# Supplementary material for: Electrophilic halogenation of hydrazones of CF3-ynones. Regioselective synthesis of 4-halo-substituted 3-CF3-pyrazoles
Source: Royal Society of Chemistry journal article supplement (doi:10.1039/c8ob02247j), 2018-01-01

## Supporting Information

### Electrophilic Halogenation of Hydrazones of CF<sub>3</sub>-ynones. Regioselective Synthesis of 4-halo-substituted 3-CF<sub>3</sub>-pyrazoles

Vasiliy M. Muzalevskiy<sup>a</sup> and Valentine G. Nenajdenko<sup>\*a</sup>

<sup>a</sup> Department of Chemistry, Moscow State University Leninskie Gory, Moscow 119992, Russia, Fax: (+)7-495-9328846

E-mail: [nenajdenko@org.chem.msu.ru](mailto:nenajdenko@org.chem.msu.ru)

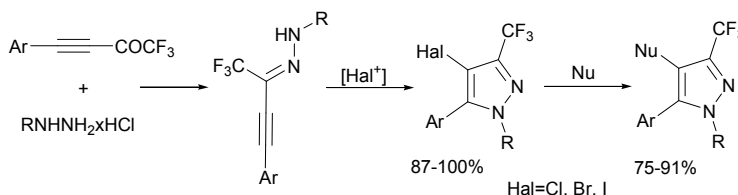

#### Table of contents

|                                                                                                                          |          |
|--------------------------------------------------------------------------------------------------------------------------|----------|
| General remarks                                                                                                          | S2       |
| Synthesis of hydrazones 3 by the reaction of ketones 1 with hydrazines 2 in (general procedure)                          | S2       |
| Characterization data of hydrazones 3                                                                                    | S2-S9    |
| Synthesis of iodopyrazoles 4 (general procedure)                                                                         | S9       |
| Characterization data of of iodopyrazoles 4                                                                              | S9-S16   |
| Synthesis of chloropyrazoles 5 (general procedure)                                                                       | S16      |
| Characterization data of chloropyrazoles 5                                                                               | S16-S17  |
| Synthesis of 4-bromo-5-(4-chlorophenyl)-3-(trifluoromethyl)-1-(4-methoxyphenyl)-1H-pyrazole (6a)                         | S18      |
| Synthesis of 4-[4-bromo-5-(4-methylphenyl)-3-(trifluoromethyl)-1H-pyrazol-1-yl]benzenesulfonamide (6b)                   | S18      |
| Synthesis of 4-[4-cyano-5-(4-methylphenyl)-3-(trifluoromethyl)-1H-pyrazol-1-yl]benzenesulfonamide (7)                    | S19      |
| Synthesis of 4-[5-(4-methylphenyl)-4-phenyl-3-(trifluoromethyl)-1H-pyrazol-1-yl]benzenesulfonamide (8)                   | S19      |
| Synthesis of 4-[5-(4-methylphenyl)-4-(phenylethynyl)-3-(trifluoromethyl)-1H-pyrazol-1-yl]benzenesulfonamide (9)          | S20      |
| Synthesis of 4-[4-[(4-methoxyphenyl)thio]-5-(4-methylphenyl)-3-(trifluoromethyl)-1H-pyrazol-1-yl]benzenesulfonamide (10) | S21      |
| Copies of all NMR spectra                                                                                                | S22-S157 |

**General remarks.** NMR spectra were recorded at 600.1 and 400.1 ( $^1\text{H}$ ), 150.9 and 100.6 ( $^{13}\text{C}$ ), 376.3 and 282.4 ( $^{19}\text{F}$ ) MHz respectively from solutions in  $\text{CDCl}_3$ ,  $\text{CD}_3\text{CN}$  and  $\text{DMSO-}d_6$ . Chemical shifts ( $\delta$ ) in ppm are reported with the use of the residual  $\text{CDCl}_3$  (7.25 for  $^1\text{H}$  and 77.0 for  $^{13}\text{C}$ ),  $\text{CD}_3\text{CN}$  (1.94 for  $^1\text{H}$  and 1.3, 118.2 for  $^{13}\text{C}$ ),  $\text{DMSO-}d_6$  (2.49 for  $^1\text{H}$  and 39.5 for  $^{13}\text{C}$ ) as internal references. The coupling constants ( $J$ ) are given in Hertz (Hz). The  $^{19}\text{F}$  chemical shifts were referenced to  $\text{C}_6\text{F}_6$  (-162.9 ppm) respectively. The silica gel used for flash chromatography was 230–400 mesh. HRMS spectra were measured at MicroTof Bruker Daltonics and Orbitrap Elite instrument. All reagents were of reagent grade and were either used as such or distilled prior to use. All solvents were dried by standard procedures and freshly distilled prior to use.  $\text{CF}_3$ -ynones **1** were obtained according to the literature procedure<sup>1</sup>.

**Synthesis of hydrazones **3** by the reaction of ketones **1** with hydrazines **2** in (general procedure):** A 20 mL screw neck vial was charged with corresponding ketone **1** (5 mmol), EtOH (10 mL), hydrochloride of arylhydrazine **2** (5.25 mmol, 1.05 equiv) and heated at 60-65 °C for 4-8 h at stirring (TLC control). Next, 1-1.5 mL of water was added to precipitate most amount of the product.\* Precipitate formed was filtered off and washed with cold with diluted EtOH (1:1, 2-3 mL). The precipitate was dried in vacuo to give pure hydrazone **3**, which can be further purified by crystallization from the mixtures of EtOH and water.

\*In case of hydrazones **3f** and **3k** after addition of water to the reaction mixture these compounds are formed as oils. Upper water layer was decanted, organic phase was dissolved in  $\text{CH}_2\text{Cl}_2$  and dried over  $\text{Na}_2\text{SO}_4$ . Evaporation of volatiles in vacuo afforded **3f** and **3k** as oils. Due to instability of **3k**, we did not succeed to obtain this compound in pure form. The purity of **3k** is about 85-90% accordingly NMR spectra.

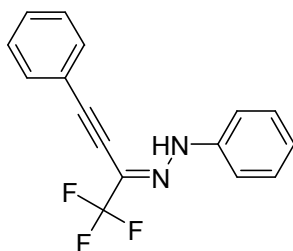

**2-(1,1,1-trifluoro-4-phenylbut-3-yn-2-ylidene)-1-phenylhydrazine (3a).** Pale yellow-green needles, m.p. 99-101 °C (Lit. data<sup>1</sup>: 99-101 °C) (1.200 g, 83% yield);  $^1\text{H}$  NMR (400.1 MHz,  $\text{DMSO-}d_6$ )  $\delta$  7.01 (td,  $J_{\text{HH}} = 6.6$  Hz,  $J_{\text{HF}} = 2.0$  Hz, 1H), 7.30-7.38 (m, 4H), 7.47-7.54 (m, 3H), 7.70-7.74 (m, 2H), 10.86 (br s, 1H, NH);  $^{13}\text{C}$  NMR (100.6 MHz,  $\text{DMSO-}d_6$ )  $\delta$  75.6, 104.2, 112.1 (q,  $J_{\text{CF}} = 38.0$  Hz, C- $\text{CF}_3$ ), 114.6, 120.5, 121.1 (q,  $J_{\text{CF}} = 270.9$  Hz,  $\text{CF}_3$ ), 122.5, 128.8, 129.2, 130.2, 132.0, 142.8;  $^{19}\text{F}$  NMR (376.3 MHz,  $\text{DMSO-}d_6$ )  $\delta$  -64.9; The NMR data are in agreement with those in the literature.<sup>1</sup>

<sup>1</sup> V. M. Muzalevskiy, A. Yu. Rulev, A. R. Romanov, E. V. Kondrashov, I. A. Ushakov, V. A. Chertkov, V. G.

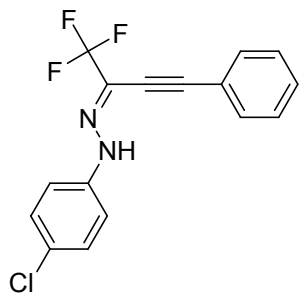

**1-(4-Chlorophenyl)-2-(1,1,1-trifluoro-4-phenylbut-3-yn-2-ylidene)hydrazine (3b).** Pale yellow crystals, m.p. 96-97 °C (1.116 g, 69% yield);  $^1\text{H NMR}$  (400.1 MHz,  $\text{CDCl}_3$ ):  $\delta$  7.13 (d,  $J_{\text{HH}} = 8.8$  Hz, 2H, 4-ClC<sub>6</sub>H<sub>4</sub>), 7.29 (d,  $J_{\text{HH}} = 8.8$  Hz, 2H, 4-ClC<sub>6</sub>H<sub>4</sub>), 7.40-7.49 (m, 3H, Ph), 7.57-7.59 (m, 2H, Ph), 8.67 (s, 1H, NH);  $^{13}\text{C NMR}$  (100.6 MHz,  $\text{CDCl}_3$ ):  $\delta$  74.4, 106.1, 115.4, 115.7 (q,  $J_{\text{CF}} = 39.8$  Hz, C-CF<sub>3</sub>), 120.3, 120.4 (q,  $J_{\text{CF}} = 270.9$  Hz, CF<sub>3</sub>), 127.8, 128.7, 129.4, 130.4, 132.0, 140.6 (Ar);  $^{19}\text{F NMR}$  (376.5 MHz,  $\text{CDCl}_3$ ):  $\delta$  -67.4; HRMS (ESI): m/z calcd for C<sub>16</sub>H<sub>9</sub>ClF<sub>3</sub>N<sub>2</sub><sup>-</sup> [M-H<sup>+</sup>]: 321.0412; found: 321.0407.

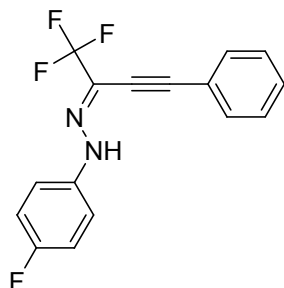

**2-(1,1,1-Trifluoro-4-phenylbut-3-yn-2-ylidene)-1-(4-fluorophenyl)hydrazine (3c).** Yellow powder, m.p. 82-84 °C (1.160 g, 76% yield);  $^1\text{H NMR}$  (400.1 MHz,  $\text{CDCl}_3$ ):  $\delta$  7.01-7.05 (m, 2H, 4-FC<sub>6</sub>H<sub>4</sub>), 7.13-7.16 (m, 2H, 4-FC<sub>6</sub>H<sub>4</sub>), 7.40-7.48 (m, 3H, Ph), 7.57-7.59 (m, 2H, Ph), 8.67 (s, 1H, NH);  $^{13}\text{C NMR}$  (100.6 MHz,  $\text{CDCl}_3$ ):  $\delta$  74.5, 105.9, 115.0 (q,  $J_{\text{CF}} = 37.2$  Hz, C-CF<sub>3</sub>), 115.4 (d,  $^3J_{\text{CF}} = 7.7$  Hz), 116.1 (d,  $^2J_{\text{CF}} = 22.9$  Hz), 120.4, 120.5 (q,  $J_{\text{CF}} = 271.3$  Hz, CF<sub>3</sub>), 128.7, 130.3, 132.0, 138.2, 158.8 (d,  $^1J_{\text{CF}} = 241.4$  Hz, C-F);  $^{19}\text{F NMR}$  (376.5 MHz,  $\text{CDCl}_3$ ):  $\delta$  -67.3 (3F, CF<sub>3</sub>), -121.9 (1F, 4-FC<sub>6</sub>H<sub>4</sub>); HRMS (ESI): m/z calcd for C<sub>16</sub>H<sub>9</sub>F<sub>4</sub>N<sub>2</sub><sup>-</sup> [M-H<sup>+</sup>]: 305.0707; found: 305.0705.

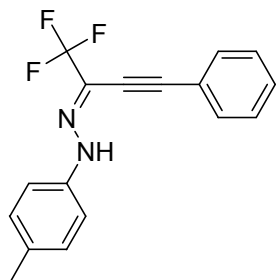

**2-(1,1,1-Trifluoro-4-phenylbut-3-yn-2-ylidene)-1-p-tolylhydrazine (3d).** Yellow powder, m.p. 115-116 °C (1.212 g, 80% yield);  $^1\text{H NMR}$  (400.1 MHz,  $\text{CDCl}_3$ )  $\delta$  2.32 (s, 3H, Me), 7.10 (d,  $J_{\text{HH}} = 8.6$  Hz, 2H, 4-MeC<sub>6</sub>H<sub>4</sub>), 7.14 (d,  $J_{\text{HH}} = 8.6$

Hz, 2H, 4-MeC<sub>6</sub>H<sub>4</sub>), 7.40-7.48 (m, 3H), 7.58-7.60 (m, 2H), 8.69 (s, 1H, NH); <sup>13</sup>C NMR (100.6 MHz, CDCl<sub>3</sub>) δ 20.7, 74.7, 105.7, 114.1 (q, *J*<sub>CF</sub> = 39.8 Hz, C-CF<sub>3</sub>), 114.2, 120.6, 120.7 (q, *J*<sub>CF</sub> = 271.3 Hz, CF<sub>3</sub>), 128.7, 129.9, 130.1, 131.9, 132.5, 139.6; <sup>19</sup>F NMR (376.3 MHz, CDCl<sub>3</sub>) δ -67.1; HRMS (ESI): *m/z* calcd for C<sub>17</sub>H<sub>12</sub>F<sub>3</sub>N<sub>2</sub><sup>-</sup> [M-H<sup>+</sup>]: 301.0958; found: 301.0958.

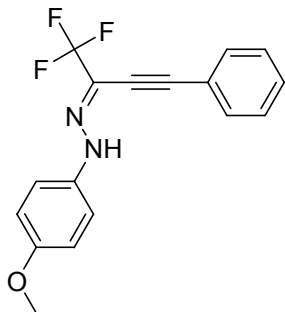

**2-(1,1,1-Trifluoro-4-phenylbut-3-yn-2-ylidene)-1-(4-methoxyphenyl)hydrazine (3e).** Yellow powder, m.p. 81-83 °C (0.956 g, 60% yield); <sup>1</sup>H NMR (400.1 MHz, CDCl<sub>3</sub>): δ 3.79 (s, 3H, OCH<sub>3</sub>), 6.88 (d, *J*<sub>HH</sub> = 8.9 Hz, 2H, 4-MeOC<sub>6</sub>H<sub>4</sub>), 7.13 (d, *J*<sub>HH</sub> = 8.9 Hz, 2H, 4-MeOC<sub>6</sub>H<sub>4</sub>), 7.39-7.47 (m, 3H, Ph), 7.56-7.59 (m, 2H, Ph), 8.66 (s, 1H, NH); <sup>13</sup>C NMR (100.6 MHz, CDCl<sub>3</sub>): δ 55.5 (OCH<sub>3</sub>), 74.8, 105.7, 113.7 (q, *J*<sub>CF</sub> = 39.1 Hz, C-CF<sub>3</sub>), 114.7, 115.4, 120.7, 120.8 (q, *J*<sub>CF</sub> = 270.9 Hz, CF<sub>3</sub>), 128.7, 130.0, 131.9, 135.8 155.7 (Ar); <sup>19</sup>F NMR (376.5 MHz, CDCl<sub>3</sub>): δ -67.0; HRMS (ESI): *m/z* calcd for C<sub>17</sub>H<sub>12</sub>F<sub>3</sub>N<sub>2</sub>O<sup>-</sup> [M-H<sup>+</sup>]: 317.0907; found: 317.0907.

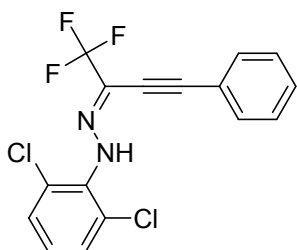

**1-(2,6-diChlorophenyl)-2-(1,1,1-trifluoro-4-phenylbut-3-yn-2-ylidene)hydrazine (3f).** Brown oil, (1.528 g, 86% yield); <sup>1</sup>H NMR (400.1 MHz, CDCl<sub>3</sub>) δ 7.01 (t, *J*<sub>HH</sub> = 8.1 Hz, 2H, 2,6-diClC<sub>6</sub>H<sub>3</sub>), 7.34 (d, *J*<sub>HH</sub> = 8.1 Hz, 2H, 2,6-diClC<sub>6</sub>H<sub>3</sub>), 7.39-7.48 (m, 3H, Ph), 7.58-7.61 (m, 2H, Ph), 8.91 (s, 1H, NH); <sup>13</sup>C NMR (100.6 MHz, CDCl<sub>3</sub>) δ 74.1, 106.5, 118.4 (q, *J*<sub>CF</sub> = 39.4 Hz, C-CF<sub>3</sub>), 120.1 (q, *J*<sub>CF</sub> = 271.7 Hz, CF<sub>3</sub>), 120.2, 125.2, 126.5, 128.7, 129.3, 130.4, 132.0, 135.5; <sup>19</sup>F NMR (376.3 MHz, CDCl<sub>3</sub>) δ -67.9; HRMS (ESI): *m/z* calcd for C<sub>16</sub>H<sub>10</sub>Cl<sub>2</sub>F<sub>3</sub>N<sub>2</sub><sup>+</sup> [M+H<sup>+</sup>]: 357.0168; found: 357.0172.

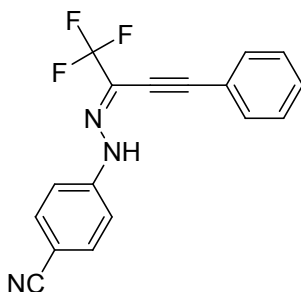

**4-(2-(1,1,1-Trifluoro-4-phenylbut-3-yn-2-ylidene)hydrazinyl)benzonitrile (3g)**. Pale yellow powder, m.p. 149-151 °C (1.341 g, 86% yield);  $^1\text{H NMR}$  (400.1 MHz,  $\text{CDCl}_3$ )  $\delta$  7.25 (d,  $J_{\text{HH}} = 8.8$  Hz, 2H, 4- $\text{CNC}_6\text{H}_4$ ), 7.41-7.51 (m, 3H, Ph), 7.58-7.61 (m, 4H, Ph, 4- $\text{CNC}_6\text{H}_4$ ), 8.81 (s, 1H, NH);  $^{13}\text{C NMR}$  (100.6 MHz,  $\text{CDCl}_3$ )  $\delta$  74.1, 105.2, 106.6, 114.4, 118.3 (q,  $J_{\text{CF}} = 39.8$  Hz, C- $\text{CF}_3$ ), 119.1, 119.9, 120.1 (q,  $J_{\text{CF}} = 272.0$  Hz,  $\text{CF}_3$ ), 128.8, 130.6, 132.1, 133.7, 145.3;  $^{19}\text{F NMR}$  (376.3 MHz,  $\text{CDCl}_3$ )  $\delta$  -67.8; HRMS (ESI): m/z calcd for  $\text{C}_{17}\text{H}_9\text{F}_3\text{N}_3$   $[\text{M}-\text{H}^+]$ : 312.0754; found: 312.0754.

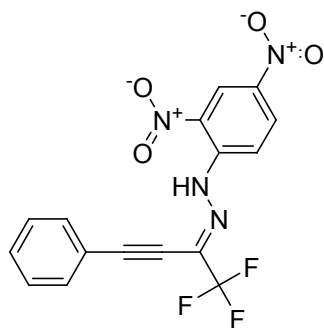

**(2-(1,1,1-Trifluoro-4-phenylbut-3-yn-2-ylidene)-1-(2,4-dinitrophenyl)hydrazine (3h)**. Obtained by slightly modified general procedure: 2,4-dinitrophenylhydrazine was dissolved in 5M HCl in MeOH,  $\text{CF}_3$ -ynone was added and heated at 60-65 °C for 4 h. Next, the product was isolated in usual manner. Yellow-orange powder, m.p. 183-185 °C (Lit. data<sup>1</sup>: 183-185 °C) (1.723 g, 91%);  $^1\text{H NMR}$  (400.1 MHz,  $\text{CDCl}_3$ )  $\delta$  7.44-7.54 (m, 3H, Ph), 7.72-7.75 (m, 2H, Ph), 8.06 (d,  $J_{\text{HH}} = 9.4$  Hz, 1H, 2,4- $\text{diNO}_2\text{C}_6\text{H}_3$ ), 8.43 (dd,  $J_{\text{HH}} = 9.4$  Hz,  $J_{\text{HH}} = 2.4$  Hz, 1H, 2,4- $(\text{NO}_2)_2\text{C}_6\text{H}_4$ ), 9.16 (d,  $J_{\text{HH}} = 2.4$  Hz, 1H, 2,4- $(\text{NO}_2)_2\text{C}_6\text{H}_4$ ), 12.11 (br s, 1H, NH);  $^{13}\text{C NMR}$  (100.6 MHz,  $\text{CDCl}_3$ )  $\delta$  74.8, 109.4, 117.7, 119.2, 119.3 (q,  $J_{\text{CF}} = 272.8$  Hz,  $\text{CF}_3$ ), 123.0, 125.6 (q,  $J_{\text{CF}} = 39.4$  Hz, C- $\text{CF}_3$ ), 129.0, 130.3, 131.4, 132.7, 140.5, 143.1;  $^{19}\text{F NMR}$  (376.3 MHz,  $\text{CDCl}_3$ )  $\delta$  -68.4; The NMR data are in agreement with those in the literature.<sup>1</sup>

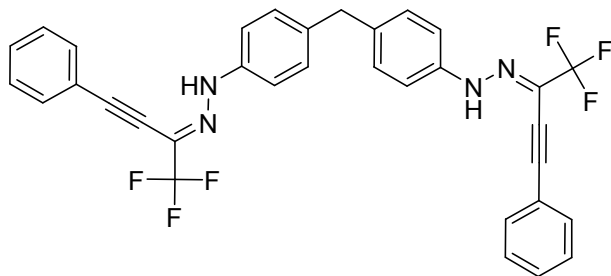

**Bis-(4-(3-(Trifluoromethyl)-4-iodo-5-phenyl-1H-pyrazol-1-yl)phenyl)methane (3i)**. Yellow powder, m.p. 177-179 °C (0.813 g, 55% yield);  $^1\text{H NMR}$  (400.1 MHz,  $\text{CDCl}_3$ )  $\delta$  3.91 (s, 2H,  $\text{CH}_2$ ), 7.13 (s, 8H), 7.40-7.48 (m, 6H, Ph), 7.57-7.59 (m, 4H, Ph), 8.70 (s, 2H, NH);  $^{13}\text{C NMR}$  (100.6 MHz,  $\text{CDCl}_3$ )  $\delta$  40.5, 74.7, 105.7, 114.4, 114.5 (q,  $J_{\text{CF}} = 37.2$  Hz, C- $\text{CF}_3$ ), 120.6 (q,  $J_{\text{CF}} = 271.3$  Hz,  $\text{CF}_3$ ), 120.7, 128.7, 129.8, 130.2, 131.9, 135.9, 140.2;  $^{19}\text{F NMR}$  (376.3 MHz,  $\text{CDCl}_3$ )  $\delta$  -67.2; HRMS (ESI): m/z calcd for  $\text{C}_{33}\text{H}_{21}\text{F}_6\text{N}_4$   $[\text{M}-\text{H}^+]$ : 587.1676; found: 587.1674.

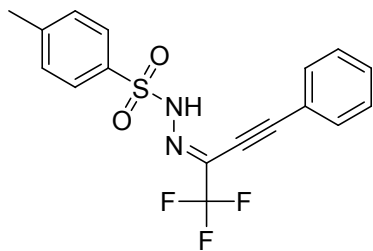

**2-(1,1,1-Trifluoro-4-phenylbut-3-yn-2-ylidene)-1-tosylhydrazine (3j).** White powder, m.p. 131-133 °C (decomp.) (1.102 g, 60% yield);  $^1\text{H}$  NMR (400.1 MHz,  $\text{CDCl}_3$ )  $\delta$  2.44 (s, 3H, Me), 7.34 (d,  $J_{\text{HH}} = 8.2$  Hz, 2H, Tos), 7.38-7.42 (m, 2H, Ph), 7.46-7.50 (m, 1H, Ph), 7.54-7.56 (m, 2H, Ph), 7.85 (d,  $J_{\text{HH}} = 8.2$  Hz, 2H, Tos), 8.81 (s, 1H, NH);  $^{13}\text{C}$  NMR (100.6 MHz,  $\text{CDCl}_3$ )  $\delta$  21.6, 73.3, 106.9, 118.9 (q,  $J_{\text{CF}} = 274.2$  Hz,  $\text{CF}_3$ ), 119.1, 124.7 (q,  $J_{\text{CF}} = 40.2$  Hz, C- $\text{CF}_3$ ), 128.0, 128.7, 129.9, 131.1, 132.4, 134.4, 145.1;  $^{19}\text{F}$  NMR (376.3 MHz,  $\text{CDCl}_3$ )  $\delta$  -69.2; HRMS (ESI): m/z calcd for  $\text{C}_{17}\text{H}_{12}\text{F}_3\text{N}_2\text{O}_2\text{S}^-$  [ $\text{M}-\text{H}^+$ ]: 365.0577; found: 365.0577.

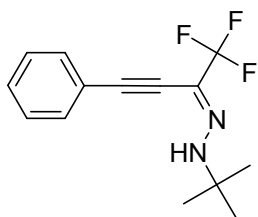

**1-tert-Butyl-2-(1,1,1-trifluoro-4-phenylbut-3-yn-2-ylidene)hydrazine (3k).** Colorless oil (0.760 g, 57% yield).  $^1\text{H}$  NMR (400 MHz,  $\text{CDCl}_3$ ):  $\delta$  1.34 (s, 9H), 6.89 (s, 1H, NH), 7.38-7.44 (m, 3H, Ph), 7.54-7.56 (m, 2H, Ph);  $^{13}\text{C}$  NMR (100.6 MHz,  $\text{CDCl}_3$ ):  $\delta$  28.7 ( $\text{CH}_3$ ), 55.2 ( $\text{C}(\text{CH}_3)_3$ ), 75.2, 103.9, 111.7 (q,  $J_{\text{CF}} = 39.5$  Hz, C- $\text{CF}_3$ ), 121.0 (q,  $J_{\text{CF}} = 270.5$  Hz,  $\text{CF}_3$ ), 121.1, 128.6, 129.6, 131.7.  $^{19}\text{F}$  NMR (376.5 MHz,  $\text{CDCl}_3$ ):  $\delta$  -67.0. HRMS (ESI): m/z calcd for  $\text{C}_{14}\text{H}_{16}\text{F}_3\text{N}_2^+$  [ $\text{M}+\text{H}^+$ ]: 269.1260; found: 269.1260.

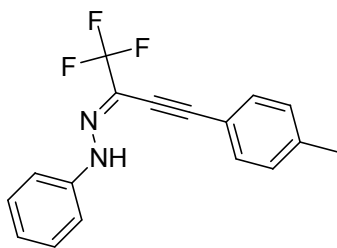

**2-(1,1,1-Trifluoro-4-p-tolylbut-3-yn-2-ylidene)-1-phenylhydrazine (3l).** Yellow powder, m.p. 101-102 °C (1.265 g, 84% yield);  $^1\text{H}$  NMR (400.1 MHz,  $\text{CDCl}_3$ )  $\delta$  2.40 (s, 3H, Me), 7.01 (t,  $J_{\text{HH}} = 7.2$  Hz, 1H, Ph), 7.17-7.25 (m, 4H, Ph, 4-MeC $_6$ H $_4$ ), 7.32 (t,  $J_{\text{HH}} = 7.7$  Hz, 2H, Ph), 7.47 (d,  $J_{\text{HH}} = 7.9$  Hz, 2H, 4-MeC $_6$ H $_4$ ), 8.70 (s, 1H, NH);  $^{13}\text{C}$  NMR (100.6 MHz,  $\text{CDCl}_3$ )  $\delta$  21.6, 74.2, 106.2, 114.2, 115.1 (q,  $J_{\text{CF}} = 39.8$  Hz, C- $\text{CF}_3$ ), 117.4, 120.6 (q,  $J_{\text{CF}} = 271.3$  Hz,  $\text{CF}_3$ ), 122.8, 129.4, 129.5, 131.9, 140.8, 142.0;  $^{19}\text{F}$  NMR (376.3 MHz,  $\text{CDCl}_3$ )  $\delta$  -67.3. HRMS (ESI): m/z calcd for  $\text{C}_{17}\text{H}_{12}\text{F}_3\text{N}_2$  [ $\text{M}-\text{H}^+$ ]: 301.0958; found: 301.0957.

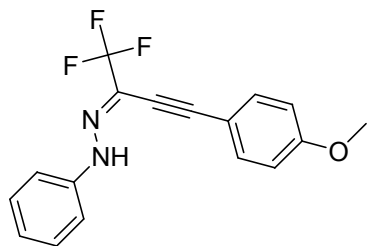

**2-(1,1,1-Trifluoro-4-(4-methoxyphenyl)but-3-yn-2-ylidene)-1-phenylhydrazine (3m).** Pale yellow needles, m.p. 100-102 °C (1.386 g, 87%);  $^1\text{H NMR}$  (400.1 MHz,  $\text{CDCl}_3$ )  $\delta$  3.86 (s, 3H, MeO), 6.93 (d,  $J_{\text{HH}} = 8.9$  Hz, 2H, 4-MeOC<sub>6</sub>H<sub>4</sub>), 7.01 (t,  $J_{\text{HH}} = 7.3$  Hz, 1H, Ph), 7.18 (d,  $J_{\text{HH}} = 7.6$  Hz, 2H, Ph), 7.32 (dd,  $J_{\text{HH}} = 8.4$  Hz,  $J_{\text{HH}} = 7.5$  Hz, 2H, Ph), 7.52 (d,  $J_{\text{HH}} = 8.9$  Hz, 2H, 4-MeOC<sub>6</sub>H<sub>4</sub>), 8.67 (s, 1H, NH);  $^{13}\text{C NMR}$  (100.6 MHz,  $\text{CDCl}_3$ )  $\delta$  55.3, 73.7, 106.2, 112.4, 114.1, 114.3, 115.3 (q,  $J_{\text{CF}} = 39.4$  Hz, C-CF<sub>3</sub>), 120.6 (q,  $J_{\text{CF}} = 271.3$  Hz, CF<sub>3</sub>), 122.7, 129.4, 133.6, 142.0, 161.1;  $^{19}\text{F NMR}$  (376.3 MHz,  $\text{CDCl}_3$ )  $\delta$  -67.4. HRMS (ESI): m/z calcd for C<sub>17</sub>H<sub>14</sub>F<sub>3</sub>N<sub>2</sub>O<sup>+</sup> [M+H<sup>+</sup>]: 319.1053; found: 319.1051.

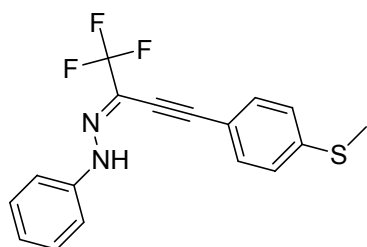

**2-(1,1,1-Trifluoro-4-(4-(methylthio)phenyl)but-3-yn-2-ylidene)-1-phenylhydrazine (3n).** Yellow crystals, m.p. 90-92 °C (1.441 g, 86%);  $^1\text{H NMR}$  (400.1 MHz,  $\text{CDCl}_3$ )  $\delta$  2.51 (s, 3H, MeS), 7.02 (t,  $J_{\text{HH}} = 7.4$  Hz, 1H, Ph), 7.18 (d,  $J_{\text{HH}} = 7.7$  Hz, 2H, Ph), 7.24 (d,  $J_{\text{HH}} = 8.4$  Hz, 2H, 4-MeSC<sub>6</sub>H<sub>4</sub>), 7.32 (t,  $J_{\text{HH}} = 7.9$  Hz, 2H, Ph), 7.47 (d,  $J_{\text{HH}} = 8.4$  Hz, 2H, 4-MeSC<sub>6</sub>H<sub>4</sub>), 8.68 (s, 1H, NH);  $^{13}\text{C NMR}$  (100.6 MHz,  $\text{CDCl}_3$ )  $\delta$  14.9, 74.8, 105.8, 114.1, 115.0 (q,  $J_{\text{CF}} = 39.1$  Hz, C-CF<sub>3</sub>), 116.2, 120.6 (q,  $J_{\text{CF}} = 271.3$  Hz, CF<sub>3</sub>), 122.8, 125.5, 129.4, 132.1, 141.9, 142.4;  $^{19}\text{F NMR}$  (376.3 MHz,  $\text{CDCl}_3$ )  $\delta$  -67.3; HRMS (ESI): m/z calcd for C<sub>17</sub>H<sub>12</sub>F<sub>3</sub>N<sub>2</sub>S<sup>-</sup> [M-H<sup>+</sup>]: 333.0679; found: 333.0677.

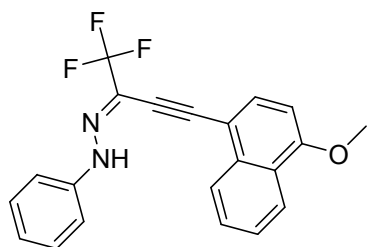

**2-(1,1,1-Trifluoro-4-(1-methoxynaphthalen-4-yl)but-3-yn-2-ylidene)-1-phenylhydrazine (3o).** Yellow needles, m.p. 99-101 °C (1.270 g, 69% yield);  $^1\text{H NMR}$  (400.1 MHz,  $\text{CDCl}_3$ )  $\delta$  4.07 (s, 3H, MeO), 6.85 (d,  $J_{\text{HH}} = 8.1$  Hz, 1H), 7.02 (t,  $J_{\text{HH}} = 7.3$  Hz, 1H, Ph), 7.19 (d,  $J_{\text{HH}} = 7.6$  Hz, 2H, Ph), 7.33 (t,  $J_{\text{HH}} = 7.9$  Hz, 2H, Ph), 7.55-7.59 (m, 1H), 7.64-7.69 (m, 1H), 7.78 (d,  $J_{\text{HH}} = 8.0$  Hz, 1H), 8.21 (d,  $J_{\text{HH}} = 8.3$  Hz, 1H), 8.33 (d,  $J_{\text{HH}} = 8.3$  Hz, 1H), 8.82 (s, 1H, NH);  $^{13}\text{C NMR}$  (100.6

MHz, CDCl<sub>3</sub>)  $\delta$  55.8, 78.2, 103.6, 105.0, 110.0, 114.1, 115.7 (q,  $J_{CF}$  = 39.1 Hz, C-CF<sub>3</sub>), 120.7 (q,  $J_{CF}$  = 270.9 Hz, CF<sub>3</sub>), 122.69, 122.72, 125.1, 125.3, 126.2, 128.2, 129.4, 132.8, 133.7, 142.1, 157.7; <sup>19</sup>F NMR (376.3 MHz, CDCl<sub>3</sub>)  $\delta$  -67.2; HRMS (ESI): m/z calcd for C<sub>21</sub>H<sub>14</sub>F<sub>3</sub>N<sub>2</sub>O- [M-H<sup>+</sup>]: 367.1064; found: 367.1061.

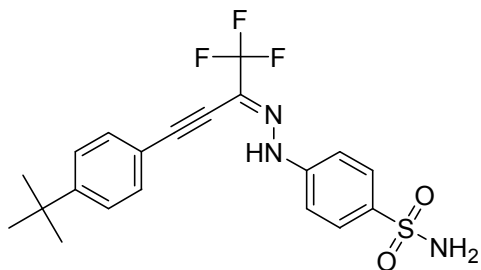

**4-{2-[3-(4-*tert*-Butylphenyl)-1-(trifluoromethyl)prop-2-yn-1-ylidene]hydrazino}benzenesulfonamide (3p).**

Pale brown powder, m.p. 160-162 °C (2.010 g, 95% yield); <sup>1</sup>H NMR (400.1 MHz, CDCl<sub>3</sub>)  $\delta$  1.35 (s, 9H, *t*-Bu), 5.38 (s, 2H, NH<sub>2</sub>), 7.22 (d,  $J_{HH}$  = 8.5 Hz, 2H), 7.43 (d,  $J_{HH}$  = 8.2 Hz, 2H), 7.54 (d,  $J_{HH}$  = 8.2 Hz, 2H), 7.81 (d,  $J_{HH}$  = 8.5 Hz, 2H), 8.95 (s, 1H, NH); <sup>13</sup>C NMR (100.6 MHz, CDCl<sub>3</sub>)  $\delta$  30.9 (C-(C(CH<sub>3</sub>)<sub>3</sub>), 35.0 (C-(C(CH<sub>3</sub>)<sub>3</sub>), 73.8, 107.0, 114.0, 116.9, 118.0 (q,  $J_{CF}$  = 39.4 Hz, C-CF<sub>3</sub>), 120.2 (q,  $J_{CF}$  = 272.0 Hz, CF<sub>3</sub>), 125.7, 128.1, 131.9, 134.9, 145.4, 154.2; <sup>19</sup>F NMR (376.3 MHz, CDCl<sub>3</sub>)  $\delta$  -67.6; HRMS (ESI): m/z calcd for C<sub>20</sub>H<sub>20</sub>F<sub>3</sub>N<sub>3</sub>O<sub>2</sub>SNa<sup>+</sup> [M+Na<sup>+</sup>]: 446.1121; found: 446.1112.

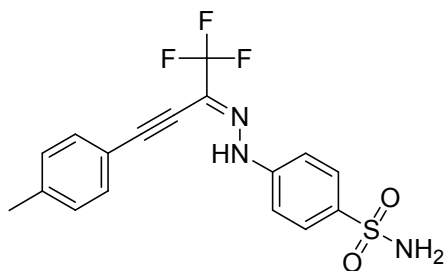

**4-{2-[3-(4-Methylphenyl)-1-(trifluoromethyl)prop-2-yn-1-ylidene]hydrazino}benzenesulfonamide 3q.** Barely

greenish powder, (1.750 g, 93% yield); m.p. 188-190 °C. <sup>1</sup>H NMR (400.1 MHz, DMSO-*d*<sub>6</sub>)  $\delta$  2.36 (s, 3H, Me), 7.23 (s, 2H, NH<sub>2</sub>), 7.31 (d,  $J_{HH}$  = 8.0 Hz, 2H, 4-MeC<sub>6</sub>H<sub>4</sub>), 7.47 (d,  $J_{HH}$  = 8.8 Hz, 2H, 4-(SO<sub>2</sub>NH<sub>2</sub>)C<sub>6</sub>H<sub>4</sub>), 7.62 (d,  $J_{HH}$  = 8.0 Hz, 2H, 4-MeC<sub>6</sub>H<sub>4</sub>), 7.81 (d,  $J_{HH}$  = 8.8 Hz, 2H, 4-(SO<sub>2</sub>NH<sub>2</sub>)C<sub>6</sub>H<sub>4</sub>), 11.09 (s, 1H, NH); <sup>13</sup>C NMR (100.6 MHz, DMSO-*d*<sub>6</sub>)  $\delta$  21.2, 75.0, 105.1, 114.1, 114.7 (q,  $J_{CF}$  = 38.3 Hz, C-CF<sub>3</sub>), 117.1, 120.7 (q,  $J_{CF}$  = 271.6 Hz, CF<sub>3</sub>), 127.3, 129.4, 132.1, 137.5, 140.7, 145.4; <sup>19</sup>F NMR (376.3 MHz, DMSO-*d*<sub>6</sub>)  $\delta$  -65.4; HRMS (ESI): m/z calcd for C<sub>17</sub>H<sub>14</sub>F<sub>3</sub>N<sub>3</sub>O<sub>2</sub>SNa<sup>+</sup> [M+Na<sup>+</sup>]: 404.0651; found: 404.0637.



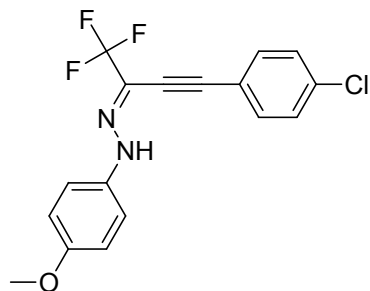

**2-(4-(4-Chlorophenyl)-1,1,1-trifluorobut-3-yn-2-ylidene)-1-(4-methoxyphenyl)hydrazine (3r).** Yellow powder, m.p. 101-103 °C (1.378 g, 78% yield);  $^1\text{H}$  NMR (400.1 MHz,  $\text{CDCl}_3$ )  $\delta$  3.79 (s, 3H, MeO), 6.88 (d,  $J_{\text{HH}} = 9.0$  Hz, 2H, 4-MeOC $_6\text{H}_4$ ), 7.13 (d,  $J_{\text{HH}} = 9.0$  Hz, 2H, 4-MeOC $_6\text{H}_4$ ), 7.39 (d,  $J_{\text{HH}} = 8.5$  Hz, 2H, 4-ClC $_6\text{H}_4$ ), 7.50 (d,  $J_{\text{HH}} = 8.5$  Hz, 2H, 4-ClC $_6\text{H}_4$ ), 8.63 (s, 1H, NH);  $^{13}\text{C}$  NMR (100.6 MHz,  $\text{CDCl}_3$ )  $\delta$  55.5, 75.7, 104.4, 113.3 (q,  $J_{\text{CF}} = 39.4$  Hz, C-CF $_3$ ), 114.7, 115.5, 119.1, 120.7 (q,  $J_{\text{CF}} = 270.5$  Hz, CF $_3$ ), 129.1, 133.0, 135.6, 136.3, 155.8;  $^{19}\text{F}$  NMR (376.3 MHz,  $\text{CDCl}_3$ )  $\delta$  -66.9; HRMS (ESI): m/z calcd for C $_{17}\text{H}_{12}\text{ClF}_3\text{N}_2\text{O}^+$  [M+H $^+$ ]: 353.0663; found: 353.0661; calcd for C $_{17}\text{H}_{11}\text{ClF}_3\text{N}_2\text{O}$  [M]: 352.0585; found: 352.0580.

**Synthesis of iodopyrazoles 4 (general procedure):** A 8 mL screw neck vial was charged with MeCN (6 mL) corresponding hydrazone **3** (1.5 mmol), I $_2$  (0.800 g, 3.15 mmol, 2.1 equiv), NaHCO $_3$  (0.265 g, 3.15 mmol, 2.1 equiv) and maintained at stirring for 1 day at room temperature. The reaction mixture was poured into water (50 mL) and few milliliters of sat. solution of Na $_2\text{SO}_3$  was added until brown color of iodine disappeared. Solution obtained was extracted with dichloromethane (3x20 mL), the combined organic phase was washed with water (20 mL) and dried over anhydrous sodium sulfate. Evaporation of the volatiles *in vacuo* gave pure iodopyrazoles **4**.

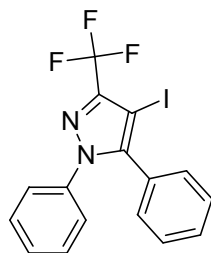

**3-(Trifluoromethyl)-4-iodo-1,5-diphenyl-1H-pyrazole (4a).** Pale brown powder, m.p. 134-135 °C (0.604 g, 97% yield).  $^1\text{H}$  NMR (400 MHz,  $\text{CDCl}_3$ )  $\delta$  7.22-7.33 (m, 7H, Ph), 7.38-7.45 (m, 3H, Ph);  $^{13}\text{C}$  NMR (100.6 MHz,  $\text{CDCl}_3$ )  $\delta$  59.5 (C-I), 120.8 (q,  $J = 270.5$  Hz, CF $_3$ ), 124.9, 128.5, 128.6, 129.0, 129.6, 130.3, 138.9, 144.3 (q,  $J = 36.9$  Hz, C-CF $_3$ ), 146.6 (C $^5$ );  $^{19}\text{F}$  NMR (376.5 MHz,  $\text{CDCl}_3$ )  $\delta$  -63.3. HRMS (ESI): m/z calcd for C $_{16}\text{H}_{11}\text{F}_3\text{IN}_2^+$  [M+H $^+$ ]: 414.9914; found: 414.9922.

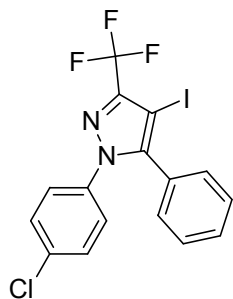

**1-(4-Chlorophenyl)-3-(trifluoromethyl)-4-iodo-5-phenyl-1H-pyrazole (4b).** Pale brown powder, m.p. 104-106 °C (0.672 g, 100% yield);  $^1\text{H}$  NMR (400.1 MHz,  $\text{CDCl}_3$ ):  $\delta$  7.16 (d,  $J_{\text{HH}} = 8.7$  Hz, 2H, 4-ClC<sub>6</sub>H<sub>4</sub>), 7.25-7.30 (m, 4H, Ar), 7.40-7.47 (m, 3H, Ar);  $^{13}\text{C}$  NMR (100.6 MHz,  $\text{CDCl}_3$ ):  $\delta$  59.9 (C-I), 120.7 (q,  $J_{\text{CF}} = 270.2$  Hz, CF<sub>3</sub>), 126.0, 128.3, 128.8, 129.2, 129.8, 130.3, 134.4, 137.5, 144.7 (q,  $J_{\text{CF}} = 36.5$  Hz, C-CF<sub>3</sub>), 146.6 (Ar);  $^{19}\text{F}$  NMR (376.5 MHz,  $\text{CDCl}_3$ ):  $\delta$  -63.4; HRMS (ESI): m/z calcd for C<sub>16</sub>H<sub>10</sub>ClF<sub>3</sub>IN<sub>2</sub><sup>+</sup> [M+H<sup>+</sup>]: 448.9524; found: 448.9533.

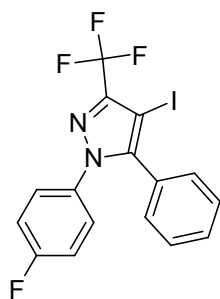

**3-(Trifluoromethyl)-1-(4-fluorophenyl)-4-iodo-5-phenyl-1H-pyrazole (4c).** Pale yellow powder, m.p. 116-118 °C (0.630 g, 97% yield);  $^1\text{H}$  NMR (400.1 MHz,  $\text{CDCl}_3$ ):  $\delta$  6.98-7.04 (m, 2H, 4-FC<sub>6</sub>H<sub>4</sub>), 7.18-7.23 (m, 2H, 4-FC<sub>6</sub>H<sub>4</sub>), 7.25-7.28 (m, 2H, Ph), 7.39-7.46 (m, 3H, Ph);  $^{13}\text{C}$  NMR (100.6 MHz,  $\text{CDCl}_3$ ):  $\delta$  59.5 (C-I), 116.0 (d,  $^2J_{\text{CF}} = 23.2$  Hz), 120.7 (q,  $J_{\text{CF}} = 270.5$  Hz, CF<sub>3</sub>), 126.9 (d,  $^3J_{\text{CF}} = 8.8$  Hz), 128.3, 128.8, 129.8, 130.3, 135.1 (d,  $^4J_{\text{CF}} = 3.3$  Hz), 144.5 (q,  $J_{\text{CF}} = 36.5$  Hz, C-CF<sub>3</sub>), 146.7, 162.1 (d,  $^1J_{\text{CF}} = 249.5$  Hz, C-F);  $^{19}\text{F}$  NMR (376.5 MHz,  $\text{CDCl}_3$ ):  $\delta$  -63.6 (3F, CF<sub>3</sub>), -113.1 (1F, 4-FC<sub>6</sub>H<sub>4</sub>); HRMS (ESI): m/z calcd for C<sub>16</sub>H<sub>10</sub>F<sub>4</sub>IN<sub>2</sub><sup>+</sup> [M+H<sup>+</sup>]: 432.9819; found: 432.9820.

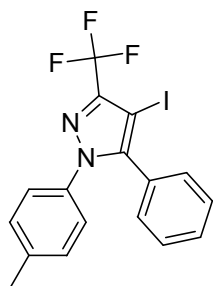

**3-(Trifluoromethyl)-4-iodo-5-phenyl-1-p-tolyl-1H-pyrazole (4d).** Pale brown powder, m.p. 100-102 °C (0.639 g, 100% yield);  $^1\text{H}$  NMR (400.1 MHz,  $\text{CDCl}_3$ )  $\delta$  2.32 (s, 3H, Me), 7.09 (s, 4H), 7.24-7.27 (m, 2H), 7.37-7.41 (m, 3H);  $^{13}\text{C}$  NMR (100.6 MHz,  $\text{CDCl}_3$ )  $\delta$  21.0, 59.2 (C-I), 120.7 (q,  $J_{\text{CF}}$

= 270.2 Hz, CF<sub>3</sub>), 124.8, 128.6, 129.5, 130.3, 136.6, 138.6, 144.1 (q,  $J_{CF}$  = 36.9 Hz, C-CF<sub>3</sub>), 146.5; <sup>19</sup>F NMR (376.3 MHz, CDCl<sub>3</sub>)  $\delta$  -63.2; HRMS (ESI): m/z calcd for C<sub>17</sub>H<sub>13</sub>F<sub>3</sub>IN<sub>2</sub><sup>+</sup> [M+H<sup>+</sup>]: 429.007; found: 429.0064.

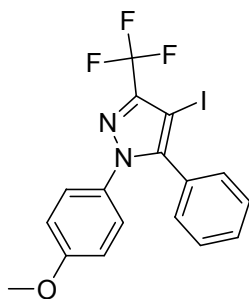

**3-(Trifluoromethyl)-4-iodo-1-(4-methoxyphenyl)-5-phenyl-1H-pyrazole (4e).** Brown powder, m.p. 109-110 °C (0.664 g, 100% yield); <sup>1</sup>H NMR (400.1 MHz, CDCl<sub>3</sub>):  $\delta$  3.78 (s, 3H, OCH<sub>3</sub>), 6.81 (d,  $J_{HH}$  = 9.0 Hz, 2H, 4-MeOC<sub>6</sub>H<sub>4</sub>), 7.13 (d,  $J_{HH}$  = 9.0 Hz, 2H, 4-MeOC<sub>6</sub>H<sub>4</sub>), 7.25-7.28 (m, 2H, Ph), 7.38-7.41 (m, 3H, Ph); <sup>13</sup>C NMR (100.6 MHz, CDCl<sub>3</sub>):  $\delta$  55.4 (OCH<sub>3</sub>), 58.9 (C-I), 114.1, 120.8 (q,  $J_{CF}$  = 270.5 Hz, CF<sub>3</sub>), 126.4, 128.6, 129.5, 130.3, 132.1, 144.0 (q,  $J_{CF}$  = 36.5 Hz, C-CF<sub>3</sub>), 146.6, 159.4 (Ar); <sup>19</sup>F NMR (376.5 MHz, CDCl<sub>3</sub>):  $\delta$  -63.2; HRMS (ESI): m/z calcd for C<sub>17</sub>H<sub>13</sub>F<sub>3</sub>IN<sub>2</sub>O<sup>+</sup> [M+H<sup>+</sup>]: 445.0019; found: 445.0022.

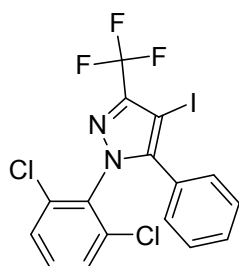

**1-(2,6-dichlorophenyl)-3-(trifluoromethyl)-4-iodo-5-phenyl-1H-pyrazole (4f).** Pale brown powder, m.p. 138-139 °C (0.723 g, 100% yield); <sup>1</sup>H NMR (400.1 MHz, CDCl<sub>3</sub>)  $\delta$  7.27-7.40 (m, 8H, Ph); <sup>13</sup>C NMR (100.6 MHz, CDCl<sub>3</sub>)  $\delta$  58.1 (C-I), 120.6 (q,  $J_{CF}$  = 270.5 Hz, CF<sub>3</sub>), 127.5, 128.5, 128.6, 129.5, 130.0, 131.6, 134.8, 145.6 (q,  $J_{CF}$  = 37.2 Hz, C-CF<sub>3</sub>), 149.1; <sup>19</sup>F NMR (376.3 MHz, CDCl<sub>3</sub>)  $\delta$  -63.6; HRMS (ESI): m/z calcd for C<sub>16</sub>H<sub>9</sub>Cl<sub>2</sub>F<sub>3</sub>IN<sub>2</sub><sup>+</sup> [M+H<sup>+</sup>]: 482.9134; found: 482.9137.

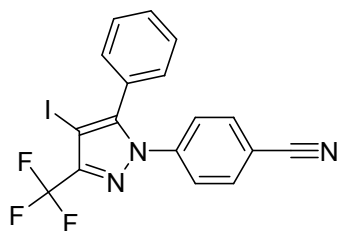

**4-(3-(Trifluoromethyl)-4-iodo-5-phenyl-1H-pyrazol-1-yl)benzonitrile (4g).** Pale brown powder, m.p. 137-138 °C (0.657 g, 100% yield); <sup>1</sup>H NMR (400.1 MHz, CDCl<sub>3</sub>)  $\delta$  7.26-7.29 (m, 2H, Ph), 7.36 (d,  $J_{HH}$  = 8.7 Hz, 2H, 4-CNC<sub>6</sub>H<sub>4</sub>), 7.44-7.52 (m, 3H, Ph), 7.60 (d,  $J_{HH}$  = 8.7 Hz, 2H, 4-CNC<sub>6</sub>H<sub>4</sub>); <sup>13</sup>C NMR (100.6 MHz, CDCl<sub>3</sub>)  $\delta$  61.2 (C-I), 112.0, 117.6,

120.5 (q,  $J_{CF} = 270.5$  Hz,  $CF_3$ ), 124.9, 128.0, 129.1, 130.1, 130.2, 133.0, 142.0, 145.5 (q,  $J_{CF} = 37.2$  Hz, C- $CF_3$ ), 146.8;

$^{19}F$  NMR (376.3 MHz,  $CDCl_3$ )  $\delta$  -63.6; HRMS (ESI): m/z calcd for  $C_{17}H_{10}F_3IN_3^+$  [ $M+H^+$ ]: 439.9866; found: 439.9867.

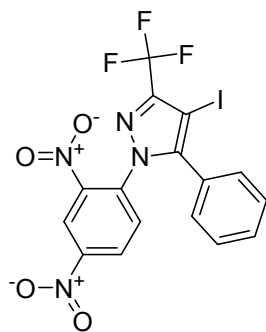

**3-(Trifluoromethyl)-4-iodo-1-(2,4-dinitrophenyl)-5-phenyl-1H-pyrazole (4h).** Pale yellow-green powder, m.p. 78-80 °C, (0.712 g, 94% yield);  $^1H$  NMR (400.1 MHz,  $CDCl_3$ )  $\delta$  7.26-7.28 (m, 2H, Ph), 7.40-7.49 (m, 3H, Ph), 7.54 (d,  $J_{HH} = 8.7$  Hz, 1H, 2,4- $diNO_2C_6H_4$ ), 8.44 (dd,  $J_{HH}=8.7$ ,  $J_{HH}=2.1$  Hz, 1H, 2,4- $(NO_2)_2C_6H_4$ ), 8.76 (d,  $J_{HH}=2.1$  Hz, 1H, 2,4- $(NO_2)_2C_6H_4$ );  $^{13}C$  NMR (100.6 MHz,  $CDCl_3$ )  $\delta$  60.6 (C-I), 120.1 (q,  $J_{CF} = 270.5$  Hz,  $CF_3$ ), 121.1, 126.5, 127.7, 129.2, 130.1, 130.5, 130.6, 136.8, 144.8 (q,  $J_{CF} = 37.6$  Hz, C- $CF_3$ ), 147.3, 148.2;  $^{19}F$  NMR (376.3 MHz,  $CDCl_3$ )  $\delta$  -63.9; HRMS (ESI): m/z calcd for  $C_{16}H_9F_3IN_4O_4^+$  [ $M+H^+$ ]: 504.9615; found: 504.9612.

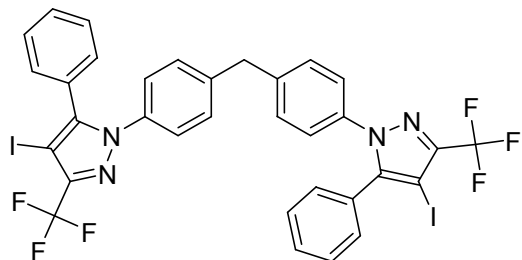

**bis(4-(3-(Trifluoromethyl)-4-iodo-5-phenyl-1H-pyrazol-1-yl)phenyl)methane (4i).** Pale brown powder, m.p. 97-99 °C (0.620 g, 98% yield);  $^1H$  NMR (400.1 MHz,  $CDCl_3$ )  $\delta$  3.93 (s, 2H,  $CH_2$ ), 7.06 (d,  $J_{HH} = 8.5$  Hz, 4H), 7.13 (d,  $J_{HH} = 8.5$  Hz, 4H), 7.24-7.28 (m, 4H, Ph), 7.37-7.45 (m, 6H, Ph);  $^{13}C$  NMR (100.6 MHz,  $CDCl_3$ )  $\delta$  40.7, 59.5 (C-I), 120.7 (q,  $J_{CF} = 270.2$  Hz,  $CF_3$ ), 125.0, 128.5, 128.7, 129.4, 129.7, 130.3, 137.4, 140.8, 144.3 (q,  $J_{CF} = 36.9$  Hz, C- $CF_3$ ), 146.5;  $^{19}F$  NMR (376.3 MHz,  $CDCl_3$ )  $\delta$  -63.3; HRMS (ESI): m/z calcd for  $C_{33}H_{21}F_6I_2N_4^+$  [ $M+H^+$ ]: 840.9754; found: 840.9774.

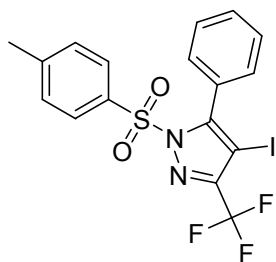

**3-(Trifluoromethyl)-4-iodo-5-phenyl-1-tosyl-1H-pyrazole (4j).** White powder, m.p. 121-123 °C (0.717 g, 97% yield); <sup>1</sup>H NMR (400.1 MHz, CDCl<sub>3</sub>) δ 2.42 (s, 3H, Me), 7.21-7.24 (m, 2H, Ph), 7.27 (d, *J*<sub>HH</sub> = 8.3 Hz, 2H, Tos), 7.47-7.51 (m, 2H, Ph), 7.54-7.56 (m, 1H, Ph), 7.58 (d, *J*<sub>HH</sub> = 8.3 Hz, 2H, Tos); <sup>13</sup>C NMR (100.6 MHz, CDCl<sub>3</sub>) δ 21.8, 64.2 (C-I), 119.8 (q, *J*<sub>CF</sub> = 271.3 Hz, CF<sub>3</sub>), 127.7, 128.2, 128.6, 130.1, 130.4, 130.6, 133.2, 144.8 (q, *J*<sub>CF</sub> = 37.6 Hz, C-CF<sub>3</sub>), 146.9, 149.6; <sup>19</sup>F NMR (376.3 MHz, CDCl<sub>3</sub>) δ -64.2; HRMS (ESI): m/z calcd for C<sub>17</sub>H<sub>13</sub>F<sub>3</sub>IN<sub>2</sub>O<sub>2</sub>S<sup>+</sup> [M+H<sup>+</sup>]: 492.9689; found: 492.9697.

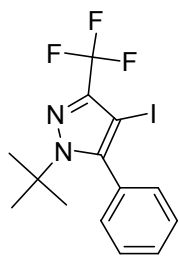

**1-tert-Butyl-3-(trifluoromethyl)-4-iodo-5-phenyl-1H-pyrazole (4k).** White powder, m.p. 89-91 °C (0.515 g, 87% yield). <sup>1</sup>H NMR (400 MHz, CDCl<sub>3</sub>): δ 1.47 (s, 9H), 7.27-7.29 (m, 2H, Ph), 7.50-7.52 (m, 3H, Ph); <sup>13</sup>C NMR (100.6 MHz, CDCl<sub>3</sub>): δ 30.6 (CH<sub>3</sub>), 61.8 (C-I), 63.8 (C(CH<sub>3</sub>)<sub>3</sub>), 121.1 (q, *J*<sub>CF</sub> = 269.8 Hz, CF<sub>3</sub>), 128.5, 129.6, 131.0, 132.0, 140.6 (q, *J*<sub>CF</sub> = 39.5 Hz, C-CF<sub>3</sub>), 146.9. <sup>19</sup>F NMR (376.5 MHz, CDCl<sub>3</sub>): δ -62.9. HRMS (ESI): m/z calcd for C<sub>14</sub>H<sub>15</sub>F<sub>3</sub>IN<sub>2</sub><sup>+</sup> [M+H<sup>+</sup>]: 395.0227; found: 395.0226.

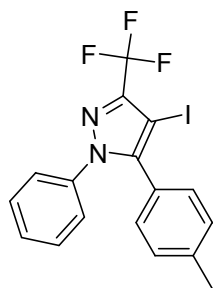

**3-(Trifluoromethyl)-4-iodo-1-phenyl-5-p-tolyl-1H-pyrazole (4l).** Pale yellow-brown powder, m.p. 122-123 °C (0.630 g, 98% yield); <sup>1</sup>H NMR (400.1 MHz, CDCl<sub>3</sub>) δ 2.38 (s, 3H, Me), 7.14 (d, *J*<sub>HH</sub> = 8.2 Hz, 2H, 4-MeC<sub>6</sub>H<sub>4</sub>), 7.19 (d, *J*<sub>HH</sub> = 8.2 Hz, 2H, 4-MeC<sub>6</sub>H<sub>4</sub>), 7.20-7.23 (m, 2H, Ph), 7.29-7.31 (m, 3H, Ph); <sup>13</sup>C NMR (100.6 MHz, CDCl<sub>3</sub>) δ 21.4, 59.4 (C-I), 120.8 (q, *J*<sub>CF</sub> = 270.5 Hz, CF<sub>3</sub>), 125.0, 125.5, 128.4, 129.0, 129.4, 130.1, 139.1, 139.7, 144.3 (q, *J*<sub>CF</sub> = 36.9 Hz, C-CF<sub>3</sub>), 146.7; <sup>19</sup>F NMR (376.3 MHz, CDCl<sub>3</sub>) δ -63.3; HRMS (ESI): m/z calcd for C<sub>17</sub>H<sub>13</sub>F<sub>3</sub>IN<sub>2</sub><sup>+</sup> [M+H<sup>+</sup>]: 429.0070; found: 429.0070.

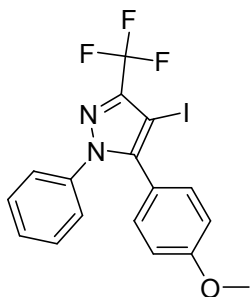

**3-(Trifluoromethyl)-4-iodo-5-(4-methoxyphenyl)-1-phenyl-1H-pyrazole (4m).** Pale yellow-brown powder, m.p. 143-145 °C (0.441 g, 99%); <sup>1</sup>H NMR (400.1 MHz, CDCl<sub>3</sub>) δ 3.82 (s, 3H, MeO), 6.89 (d, *J*<sub>HH</sub> = 8.8 Hz, 2H, 4-MeOC<sub>6</sub>H<sub>4</sub>), 7.18 (d, *J*<sub>HH</sub> = 8.8 Hz, 2H, 4-MeOC<sub>6</sub>H<sub>4</sub>), 7.19-7.22 (m, 2H, Ph), 7.29-7.32 (m, 3H, Ph); <sup>13</sup>C NMR (100.6 MHz, CDCl<sub>3</sub>) δ 55.2, 59.5 (C-I), 114.1, 120.5, 120.8 (q, *J*<sub>CF</sub> = 270.5 Hz, CF<sub>3</sub>), 124.9, 128.4, 129.0, 131.6, 139.1, 144.2 (q, *J*<sub>CF</sub> = 36.9 Hz, C-CF<sub>3</sub>), 146.5, 160.3; <sup>19</sup>F NMR (376.3 MHz, CDCl<sub>3</sub>) δ -63.3. HRMS (ESI): m/z calcd for C<sub>17</sub>H<sub>13</sub>F<sub>3</sub>IN<sub>2</sub>O<sup>+</sup> [M+H<sup>+</sup>]: 445.0019; found: 445.0020.

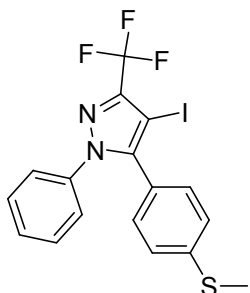

**3-(Trifluoromethyl)-4-iodo-5-(4-(methylthio)phenyl)-1-phenyl-1H-pyrazole (4n).** Brown powder, m.p. 92-94 °C (0.688 g, 100% yield); <sup>1</sup>H NMR (400.1 MHz, CDCl<sub>3</sub>) δ 2.48 (s, 3H, MeS), 7.15 (d, *J*<sub>HH</sub> = 8.5 Hz, 2H, 4-MeSC<sub>6</sub>H<sub>4</sub>), 7.20-7.23 (m, 4H, Ph), 7.30-7.33 (m, 3H, Ph); <sup>13</sup>C NMR (100.6 MHz, CDCl<sub>3</sub>) δ 14.9, 59.5 (C-I), 120.8 (q, *J*<sub>CF</sub> = 270.2 Hz, CF<sub>3</sub>), 124.5, 125.0, 125.5, 128.5, 129.1, 130.5, 139.0, 141.1, 144.4 (q, *J*<sub>CF</sub> = 36.9 Hz, C-CF<sub>3</sub>), 146.1; <sup>19</sup>F NMR (376.3 MHz, CDCl<sub>3</sub>) δ -63.3; HRMS (ESI): m/z calcd C<sub>17</sub>H<sub>13</sub>F<sub>3</sub>IN<sub>2</sub>S<sup>+</sup> [M+H<sup>+</sup>]: 460.9791; found: 460.9795.

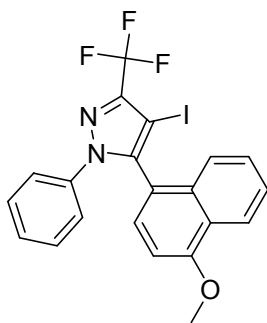

**3-(Trifluoromethyl)-4-iodo-5-(1-methoxynaphthalen-4-yl)-1-phenyl-1H-pyrazole (4o).** Pale brown powder, m.p. 159-161 °C (0.705 g, 95% yield); <sup>1</sup>H NMR (400.1 MHz, CDCl<sub>3</sub>) δ 4.04 (s, 3H, MeO), 6.82 (d, *J*<sub>HH</sub> = 8.0 Hz, 1H), 7.14-

7.21 (m, 5H), 7.26 (d,  $J_{HH} = 8.0$  Hz, 1H), 7.42-7.45 (m, 1H), 7.47-7.54 (m, 2H), 8.32-8.35 (m, 1H);  $^{13}\text{C}$  NMR (100.6 MHz,  $\text{CDCl}_3$ )  $\delta$  55.6, 62.5 (C-I), 103.2, 118.3, 120.9 (q,  $J_{CF} = 270.2$  Hz,  $\text{CF}_3$ ), 122.6, 123.9, 124.7, 125.5, 125.8, 127.7, 128.2, 128.8, 130.2, 132.3, 139.2, 144.2 (q,  $J_{CF} = 37.2$  Hz, C- $\text{CF}_3$ ), 146.4, 157.0;  $^{19}\text{F}$  NMR (376.3 MHz,  $\text{CDCl}_3$ )  $\delta$  -63.1; HRMS (ESI):  $m/z$  calcd for  $\text{C}_{21}\text{H}_{15}\text{F}_3\text{IN}_2\text{O}^+$  [ $\text{M}+\text{H}^+$ ]: 495.0176; found: 495.0177.

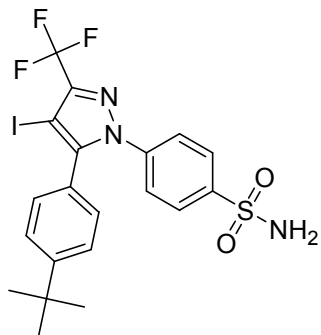

**4-[5-(4-*tert*-Butylphenyl)-4-iodo-3-(trifluoromethyl)-1H-pyrazol-1-yl]benzenesulfonamide (4p).** Pale yellow-brown powder, m.p. 185-187 °C (0.821 g, 100% yield);  $^1\text{H}$  NMR (400.1 MHz,  $\text{CDCl}_3$ )  $\delta$  1.33 (s, 9H, *t*-Bu), 5.22 (s, 2H,  $\text{NH}_2$ ), 7.17 (d,  $J_{HH} = 8.5$  Hz, 2H, 4-*t*- $\text{BuC}_6\text{H}_4$ ), 7.34 (d,  $J_{HH} = 8.7$  Hz, 2H, 4-( $\text{SO}_2\text{NH}_2$ ) $\text{C}_6\text{H}_4$ ), 7.43 (d,  $J_{HH} = 8.5$  Hz, 2H, 4-*t*- $\text{BuC}_6\text{H}_4$ ), 7.81 (d,  $J_{HH} = 8.7$  Hz, 2H, 4-( $\text{SO}_2\text{NH}_2$ ) $\text{C}_6\text{H}_4$ );  $^{13}\text{C}$  NMR (100.6 MHz,  $\text{CDCl}_3$ )  $\delta$  31.1 (C-( $\text{CH}_3$ ) $_3$ ), 34.9 (C-( $\text{CH}_3$ ) $_3$ ), 60.9 (C-I), 120.6 (q,  $J_{CF} = 270.2$  Hz,  $\text{CF}_3$ ), 124.9, 125.0, 126.0, 127.4, 129.8, 141.4, 142.2, 145.2 (q,  $J_{CF} = 36.8$  Hz, C- $\text{CF}_3$ ), 147.0, 153.5;  $^{19}\text{F}$  NMR (376.3 MHz,  $\text{CDCl}_3$ )  $\delta$  -63.4; HRMS (ESI):  $m/z$  calcd for  $\text{C}_{20}\text{H}_{20}\text{F}_3\text{IN}_3\text{O}_2\text{S}^+$  [ $\text{M}+\text{H}^+$ ]: 550.0268; found: 550.0255.

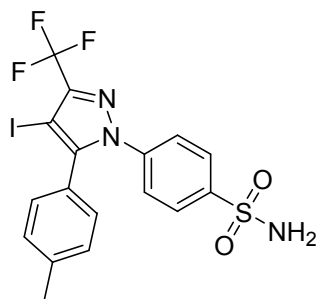

**4-[5-(4-Methylphenyl)-4-iodo-3-(trifluoromethyl)-1H-pyrazol-1-yl]benzenesulfonamide (4q).** Pale yellow-brown powder, m.p. 186-188 °C (0.759 g, 100% yield);  $^1\text{H}$  NMR (400.1 MHz,  $\text{CDCl}_3$ )  $\delta$  2.41 (s, 3H, Me), 4.81 (s, 2H,  $\text{NH}_2$ ), 7.13 (d,  $J_{HH} = 8.1$  Hz, 2H, 4-Me $\text{C}_6\text{H}_4$ ), 7.23 (d,  $J_{HH} = 8.1$  Hz, 2H, 4-Me $\text{C}_6\text{H}_4$ ), 7.37 (d,  $J_{HH} = 8.8$  Hz, 2H, 4-( $\text{SO}_2\text{NH}_2$ ) $\text{C}_6\text{H}_4$ ), 7.85 (d,  $J_{HH} = 8.8$  Hz, 2H, 4-( $\text{SO}_2\text{NH}_2$ ) $\text{C}_6\text{H}_4$ );  $^1\text{H}$  NMR (400.1 MHz,  $\text{DMSO}-d_6$ )  $\delta$  2.34 (s, 3H, Me), 7.23 (d,  $J_{HH} = 8.3$  Hz, 2H, 4-Me $\text{C}_6\text{H}_4$ ), 7.27 (d,  $J_{HH} = 8.3$  Hz, 2H, 4-Me $\text{C}_6\text{H}_4$ ), 7.47 (s, 2H,  $\text{NH}_2$ ), 7.48 (d,  $J_{HH} = 8.7$  Hz, 2H, 4-( $\text{SO}_2\text{NH}_2$ ) $\text{C}_6\text{H}_4$ ), 7.82 (d,  $J_{HH} = 8.7$  Hz, 2H, 4-( $\text{SO}_2\text{NH}_2$ ) $\text{C}_6\text{H}_4$ );  $^{13}\text{C}$  NMR (100.6 MHz,  $\text{DMSO}-d_6$ )  $\delta$  20.8, 62.8 (C-I), 120.9 (q,  $J_{CF} = 270.2$  Hz,  $\text{CF}_3$ ), 125.1, 125.8, 126.6, 129.3, 130.2, 139.6, 140.9, 143.2 (q,  $J_{CF} = 35.8$  Hz, C- $\text{CF}_3$ ), 144.0,

147.5;  $^{19}\text{F}$  NMR (376.3 MHz,  $\text{CDCl}_3$ )  $\delta$  -63.6;  $^{19}\text{F}$  NMR (376.3 MHz,  $\text{DMSO-}d_6$ )  $\delta$  -63.7; HRMS (ESI):  $m/z$  calcd for  $\text{C}_{17}\text{H}_{14}\text{F}_3\text{IN}_3\text{O}_2\text{S}^+$   $[\text{M}+\text{H}^+]$ : 507.9798; found: 507.9796.

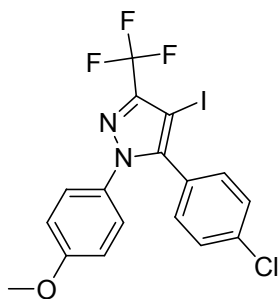

**5-(4-Chlorophenyl)-3-(trifluoromethyl)-4-iodo-1-(4-methoxyphenyl)-1H-pyrazole (4r).** Pale brown powder, m.p. 107-108 °C (0.717 g, 100% yield);  $^1\text{H}$  NMR (400.1 MHz,  $\text{CDCl}_3$ )  $\delta$  3.77 (s, 3H, MeO), 6.81 (d,  $J_{\text{HH}} = 9.0$  Hz, 2H, 4-MeOC $_6\text{H}_4$ ), 7.11 (d,  $J_{\text{HH}} = 9.0$  Hz, 2H, 4-MeOC $_6\text{H}_4$ ), 7.19 (d,  $J_{\text{HH}} = 8.5$  Hz, 2H, 4-ClC $_6\text{H}_4$ ), 7.35 (d,  $J_{\text{HH}} = 8.5$  Hz, 2H, 4-ClC $_6\text{H}_4$ );  $^{13}\text{C}$  NMR (100.6 MHz,  $\text{CDCl}_3$ )  $\delta$  55.4, 59.1 (C-I), 114.2, 120.7 (q,  $J_{\text{CF}} = 270.5$  Hz, CF $_3$ ), 126.4, 126.9, 128.9, 131.6, 131.8, 135.7, 144.1 (q,  $J_{\text{CF}} = 36.9$  Hz, C-CF $_3$ ), 145.4, 159.6;  $^{19}\text{F}$  NMR (376.3 MHz,  $\text{CDCl}_3$ )  $\delta$  -63.2; HRMS (ESI):  $m/z$  calcd for  $\text{C}_{17}\text{H}_{12}\text{ClF}_3\text{IN}_2\text{O}^+$   $[\text{M}+\text{H}^+]$ : 478.9629; found: 478.9626.

**Synthesis of chloropyrazoles 5 (general procedure):** A 8 mL screw neck vial was charged with corresponding hydrazone **3** (0.5 mmol), NCS (0.134 g, 1 mmol, 2 equiv), CuCl (0.0025 g, 0.025 mmol, 5 mol%), MeCN (2 mL) and heated for 2-4 h at 80 °C. The reaction mixture was poured into water (50 mL) and extracted with dichloromethane (3x20 mL). The combined organic phase was washed with water (20 mL) and dried over anhydrous sodium sulfate. Volatiles were evaporated in vacuo, the residue was purified by column chromatography on silica gel using mixture of hexane with  $\text{CH}_2\text{Cl}_2$  (2:1) for **5a,b** or  $\text{CH}_2\text{Cl}_2$  with MeOH (30:1) for **5c**.

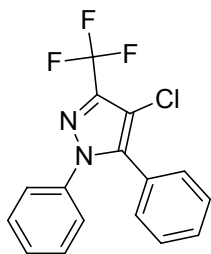

**4-Chloro-3-(trifluoromethyl)-1,5-diphenyl-1H-pyrazole (5a).** Yellow powder, m.p. 91-93 °C (0.137 g, 85% yield).  $^1\text{H}$  NMR (400 MHz,  $\text{CDCl}_3$ )  $\delta$  7.25-7.31 (m, 4H, Ph), 7.33-7.37 (m, 3H, Ph), 7.37-7.43 (m, 3H, Ph);  $^{13}\text{C}$  NMR (100.6 MHz,  $\text{CDCl}_3$ )  $\delta$  108.7 (C-Cl), 120.6 (q,  $J = 269.8$  Hz, CF $_3$ ), 125.0, 126.7, 128.6, 128.7, 129.1, 129.6, 129.8, 138.9, 139.6 (q,  $J = 37.6$  Hz, C-CF $_3$ ), 141.3;  $^{19}\text{F}$  NMR (376.5 MHz,  $\text{CDCl}_3$ )  $\delta$  -63.6. HRMS (ESI):  $m/z$  calcd for  $\text{C}_{16}\text{H}_{11}^{35}\text{ClF}_3\text{N}_2^+$   $[\text{M}+\text{H}^+]$ : 323.0557; found: 325.0558; calcd for  $\text{C}_{16}\text{H}_{11}^{37}\text{ClF}_3\text{N}_2^+$   $[\text{M}+\text{H}^+]$ : 325.0528; found: 325.0527.



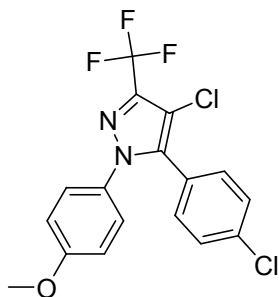

**4-Chloro-5-(4-chlorophenyl)-3-(trifluoromethyl)-1-(4-methoxyphenyl)-1H-pyrazole (5b).** Pale yellow powder, m.p. 87-89 °C (0.186 g, 96% yield);  $^1\text{H}$  NMR (400.1 MHz,  $\text{CDCl}_3$ )  $\delta$  3.78 (s, 3H, MeO), 6.84 (d,  $J_{\text{HH}} = 9.0$  Hz, 2H, 4-MeOC $_6$ H $_4$ ), 7.14 (d,  $J_{\text{HH}} = 9.0$  Hz, 2H, 4-MeOC $_6$ H $_4$ ), 7.21 (d,  $J_{\text{HH}} = 8.6$  Hz, 2H, 4-ClC $_6$ H $_4$ ), 7.35 (d,  $J_{\text{HH}} = 8.6$  Hz, 2H, 4-ClC $_6$ H $_4$ );  $^{13}\text{C}$  NMR (100.6 MHz,  $\text{CDCl}_3$ )  $\delta$  55.4, 108.4 (C-Cl), 114.3, 120.5 (q,  $J_{\text{CF}} = 270.5$  Hz, CF $_3$ ), 125.2, 126.4, 129.0, 131.1, 131.7, 135.7, 139.3 (q,  $J_{\text{CF}} = 37.2$  Hz, C-CF $_3$ ), 140.1, 159.7;  $^{19}\text{F}$  NMR (376.3 MHz,  $\text{CDCl}_3$ )  $\delta$  -63.5; HRMS (ESI): m/z calcd for C $_{17}$ H $_{12}$ Cl $_2$ F $_3$ N $_2$ O $^+$  [M+H $^+$ ]: 387.0273; found: 387.0265.

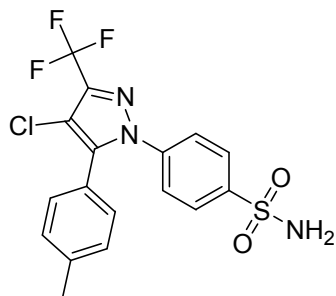

**4-[4-Chloro-5-(4-methylphenyl)-3-(trifluoromethyl)-1H-pyrazol-1-yl]benzenesulfonamide (5c)**

Pale yellow crystals, m.p. 169-171 °C (0.181 g, 87% yield);  $^1\text{H}$  NMR (600.1 MHz,  $\text{CDCl}_3$ )  $\delta$  2.39 (s, 3H, Me), 5.16 (s, 2H, NH $_2$ ), 7.15 (d,  $J_{\text{HH}} = 7.7$  Hz, 2H, 4-MeC $_6$ H $_4$ ), 7.23 (d,  $J_{\text{HH}} = 7.7$  Hz, 2H, 4-MeC $_6$ H $_4$ ), 7.39 (d,  $J_{\text{HH}} = 8.8$  Hz, 2H, 4-(SO $_2$ NH $_2$ )C $_6$ H $_4$ ), 7.85 (d,  $J_{\text{HH}} = 8.8$  Hz, 2H, 4-(SO $_2$ NH $_2$ )C $_6$ H $_4$ );  $^{13}\text{C}$  NMR (150.9 MHz,  $\text{CDCl}_3$ )  $\delta$  21.4, 109.7 (C-Cl), 120.3 (q,  $J_{\text{CF}} = 270.9$  Hz, CF $_3$ ), 123.2, 125.1, 127.5, 129.6, 129.9, 140.5, 140.6 (q,  $J_{\text{CF}} = 37.6$  Hz, C-CF $_3$ ), 141.5, 141.9, 142.1;  $^{19}\text{F}$  NMR (376.3 MHz,  $\text{CDCl}_3$ )  $\delta$  -63.9; HRMS (ESI): m/z calcd for C $_{17}$ H $_{14}$ ClF $_3$ N $_3$ O $_2$ S $^+$  [M+H $^+$ ]: 416.0442; found: 416.0440.

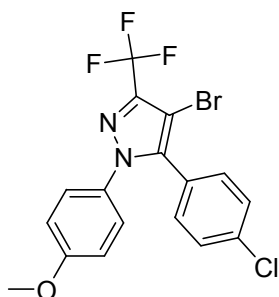

**4-Bromo-5-(4-chlorophenyl)-3-(trifluoromethyl)-1-(4-methoxyphenyl)-1H-pyrazole (6a).** A 8 mL screw neck vial was charged with hydrazone **3r** (1 mmol), MeCN (4 mL), NaHCO<sub>3</sub> (0.126 g, 1.5 mmol), Br<sub>2</sub> (1.5 mL of 1M solution in MeCN, 1.5 mmol) and stirred at room temperature overnight. The reaction mixture was poured into water (50 mL) and extracted with dichloromethane (3x20 mL). The combined organic phase was washed with water (20 mL) and dried over anhydrous sodium sulfate. Volatiles were evaporated in vacuo, the residue was purified by column chromatography on silica gel using mixture of hexane with CH<sub>2</sub>Cl<sub>2</sub> (2:1).

Pale brown powder, m.p. 104-106 °C (0.374 g, 87% yield); <sup>1</sup>H NMR (400.1 MHz, CDCl<sub>3</sub>) δ 3.78 (s, 3H, MeO), 6.83 (d, *J*<sub>HH</sub> = 9.0 Hz, 2H, 4-MeOC<sub>6</sub>H<sub>4</sub>), 7.13 (d, *J*<sub>HH</sub> = 9.0 Hz, 2H, 4-MeOC<sub>6</sub>H<sub>4</sub>), 7.21 (d, *J*<sub>HH</sub> = 8.6 Hz, 2H, 4-ClC<sub>6</sub>H<sub>4</sub>), 7.35 (d, *J*<sub>HH</sub> = 8.6 Hz, 2H, 4-ClC<sub>6</sub>H<sub>4</sub>); <sup>13</sup>C NMR (100.6 MHz, CDCl<sub>3</sub>) δ 55.4, 93.0 (C-Br), 114.3, 120.6 (q, *J*<sub>CF</sub> = 269.8 Hz, CF<sub>3</sub>), 125.8, 126.4, 129.0, 131.3, 131.7, 135.7, 140.9 (q, *J*<sub>CF</sub> = 37.2 Hz, C-CF<sub>3</sub>), 141.9, 159.7; <sup>19</sup>F NMR (376.3 MHz, CDCl<sub>3</sub>) δ -63.5; HRMS (ESI): m/z calcd for C<sub>17</sub>H<sub>12</sub><sup>79</sup>BrClF<sub>3</sub>N<sub>2</sub>O<sup>+</sup> [M+H<sup>+</sup>]: 430.9768; found: 430.9753; calcd for C<sub>17</sub>H<sub>12</sub><sup>81</sup>BrClF<sub>3</sub>N<sub>2</sub>O<sup>+</sup> [M+H<sup>+</sup>]: 432.9747; found: 432.9749.

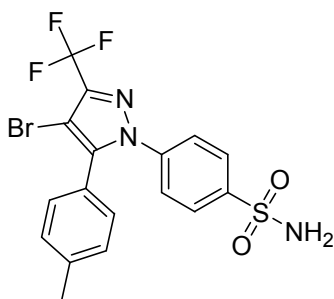

**4-[4-Bromo-5-(4-methylphenyl)-3-(trifluoromethyl)-1H-pyrazol-1-yl]benzenesulfonamide (6b).** A 8 mL screw neck vial was charged with corresponding hydrazone **3p** (0.5 mmol), NBS (0.134 g, 1 mmol, 2 equiv), MeCN (2 mL) and heated for 2 h at 80 °C. The reaction mixture was poured into water (50 mL) and extracted with dichloromethane (3x20 mL). The combined organic phase was washed with water (20 mL) and dried over anhydrous sodium sulfate. Volatiles were evaporated in vacuo, the residue was purified by column chromatography on silica gel using mixture of CH<sub>2</sub>Cl<sub>2</sub> with MeOH (30:1). Pale yellow-green powder, m.p. 155-157 °C (0.209 g, 91% yield); <sup>1</sup>H NMR (600.1 MHz, CDCl<sub>3</sub>) δ 2.40 (s, 3H, Me), 5.28 (s, 2H, NH<sub>2</sub>), 7.16 (d, *J*<sub>HH</sub> = 8.0 Hz, 2H, 4-MeC<sub>6</sub>H<sub>4</sub>), 7.24 (d, *J*<sub>HH</sub> = 8.0 Hz, 2H, 4-MeC<sub>6</sub>H<sub>4</sub>), 7.38 (d, *J*<sub>HH</sub> = 8.8 Hz, 2H, 4-(SO<sub>2</sub>NH<sub>2</sub>)C<sub>6</sub>H<sub>4</sub>), 7.85 (d, *J*<sub>HH</sub> = 8.8 Hz, 2H, 4-(SO<sub>2</sub>NH<sub>2</sub>)C<sub>6</sub>H<sub>4</sub>); <sup>13</sup>C NMR (150.9 MHz, CDCl<sub>3</sub>) δ 21.4, 94.4 (C-Br), 120.4 (q, *J*<sub>CF</sub> = 269.8 Hz, CF<sub>3</sub>), 123.8, 125.0, 127.4, 129.76, 129.84, 140.5, 141.5, 142.1 (q, *J*<sub>CF</sub> = 37.6 Hz, C-CF<sub>3</sub>), 142.1, 143.7; <sup>19</sup>F NMR (376.3 MHz, CDCl<sub>3</sub>) δ -63.9; HRMS (ESI): m/z calcd for C<sub>17</sub>H<sub>14</sub><sup>79</sup>BrF<sub>3</sub>N<sub>3</sub>O<sub>2</sub>S<sup>+</sup> [M+H<sup>+</sup>]: 459.9937; found: 459.9935; calcd for C<sub>17</sub>H<sub>14</sub><sup>84</sup>BrF<sub>3</sub>N<sub>3</sub>O<sub>2</sub>S<sup>+</sup> [M+H<sup>+</sup>]: 461.9917; found: 461.9917.

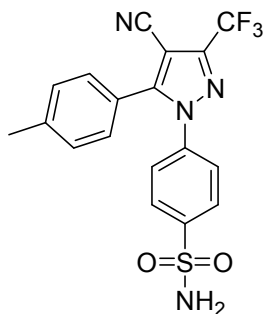

**4-[4-Cyano-5-(4-methylphenyl)-3-(trifluoromethyl)-1H-pyrazol-1-yl]benzenesulfonamide (7).** A 25 mL one necked round-bottomed flask was charged with iodopyrazole **4q** (0.177 g, 0.35 mmol), CuCN (0.038 g, 0.42 mmol), dry DMF (2 mL), flushed with argon and heated with reflux condenser at 150-155 °C (oil bath) for 8 h. The cooled reaction mixture was dispersed between CH<sub>2</sub>Cl<sub>2</sub> and water (both 50 mL) and filtered through celite. Organic layer was separated, the water layer was extracted with CH<sub>2</sub>Cl<sub>2</sub> (3x20 mL), combined extract was washed with 0.1 M HCl (50 mL) and dried over Na<sub>2</sub>SO<sub>4</sub>. Volatiles were evaporated in vacuo, the residue was purified by column chromatography on silica gel using mixture of CH<sub>2</sub>Cl<sub>2</sub> and MeOH (30:1). Evaporation of the solvents gave compound **7** as white powder, 0.129 g, 91% yield; m.p. 174-176 °C. <sup>1</sup>H NMR (600.1 MHz, CDCl<sub>3</sub>) δ 2.38 (s, 3H, Me), 5.32 (s, 2H, NH<sub>2</sub>), 7.20 (d, *J*<sub>HH</sub> = 8.4 Hz, 2H, 4-MeC<sub>6</sub>H<sub>4</sub>), 7.24 (d, *J*<sub>HH</sub> = 8.4 Hz, 2H, 4-MeC<sub>6</sub>H<sub>4</sub>), 7.42 (d, *J*<sub>HH</sub> = 8.9 Hz, 2H, 4-(SO<sub>2</sub>NH<sub>2</sub>)C<sub>6</sub>H<sub>4</sub>), 7.90 (d, *J*<sub>HH</sub> = 8.9 Hz, 2H, 4-(SO<sub>2</sub>NH<sub>2</sub>)C<sub>6</sub>H<sub>4</sub>); <sup>13</sup>C NMR (150.9 MHz, CDCl<sub>3</sub>) δ 21.4, 92.7, 110.8, 119.5 (q, *J*<sub>CF</sub> = 270.9 Hz, CF<sub>3</sub>), 121.9, 125.6, 127.7, 129.0, 130.3, 141.0, 142.0, 142.7, 144.9 (q, *J*<sub>CF</sub> = 39.4 Hz, C-CF<sub>3</sub>), 150.4; <sup>19</sup>F NMR (376.3 MHz, CDCl<sub>3</sub>) δ -63.7; HRMS (ESI): m/z calcd for C<sub>18</sub>H<sub>14</sub>F<sub>3</sub>N<sub>4</sub>O<sub>2</sub>S<sup>+</sup> [M+H<sup>+</sup>]: 407.0784; found: 407.0777.

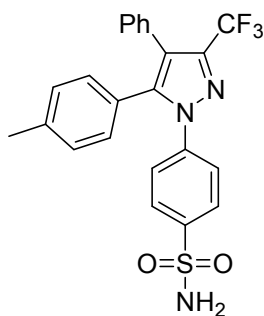

**4-[5-(4-Methylphenyl)-4-phenyl-3-(trifluoromethyl)-1H-pyrazol-1-yl]benzenesulfonamide (8).** A 12 mL screw neck vial was flushed with argon and charged with iodopyrazole **4q** (0.177 g, 0.35 mmol), PhB(OH)<sub>2</sub> (0.051 g, 0.42 mmol), K<sub>2</sub>CO<sub>3</sub> (0.097 g, 0.7 mmol), DMF (4 mL), water (0.5 mL), Pd(PPh<sub>3</sub>)<sub>4</sub> (0.020 g, 0.0175 mmol, 5 mol%). The vial was repeatedly flushed with argon, close tightly and heated at 110 °C for 14 h. The cooled reaction mixture was dispersed between CH<sub>2</sub>Cl<sub>2</sub> and water (both 50 mL) and filtered through celite. Organic layer was separated, the water layer was extracted with CH<sub>2</sub>Cl<sub>2</sub> (3x20 mL), combined extract was washed with 0.1 M HCl (50 mL) and dried over Na<sub>2</sub>SO<sub>4</sub>. Volatiles were evaporated in vacuo, the residue was

purified by column chromatography on silica gel using mixture of CH<sub>2</sub>Cl<sub>2</sub> and MeOH (30:1). Evaporation of the solvents gave compound **8** as white powder, 0.132 g, 83% yield; m.p. 95-97 °C. <sup>1</sup>H NMR (600.1 MHz, CDCl<sub>3</sub>) δ 2.27 (s, 3H, Me), 5.50 (s, 2H, NH<sub>2</sub>), 6.89 (d, *J*<sub>HH</sub> = 8.1 Hz, 2H, 4-MeC<sub>6</sub>H<sub>4</sub>), 7.02 (d, *J*<sub>HH</sub> = 8.1 Hz, 2H, 4-MeC<sub>6</sub>H<sub>4</sub>), 7.19-7.20 (m, 2H, Ph), 7.28-7.29 (m, 3H, Ph), 7.41 (d, *J*<sub>HH</sub> = 8.6 Hz, 2H, 4-(SO<sub>2</sub>NH<sub>2</sub>)C<sub>6</sub>H<sub>4</sub>), 7.84 (d, *J*<sub>HH</sub> = 8.6 Hz, 2H, 4-(SO<sub>2</sub>NH<sub>2</sub>)C<sub>6</sub>H<sub>4</sub>); <sup>13</sup>C NMR (150.6 MHz, CDCl<sub>3</sub>) δ 21.2, 121.3 (q, *J*<sub>CF</sub> = 270.9 Hz, CF<sub>3</sub>), 121.7, 124.8, 125.4, 127.3, 127.7, 128.1, 129.6, 129.8, 130.0, 130.1, 139.4, 141.2, 141.6 (q, *J*<sub>CF</sub> = 36.5 Hz, C-CF<sub>3</sub>), 142.3, 142.9; <sup>19</sup>F NMR (376.3 MHz, CDCl<sub>3</sub>) δ -60.9; HRMS (ESI): m/z calcd for C<sub>23</sub>H<sub>19</sub>F<sub>3</sub>N<sub>3</sub>O<sub>2</sub>S<sup>+</sup> [M+H<sup>+</sup>]: 458.1145; found: 458.1145.

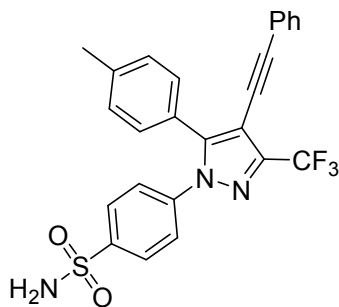

**4-[5-(4-Methylphenyl)-4-(phenylethynyl)-3-(trifluoromethyl)-1H-pyrazol-1-yl]benzenesulfonamide (9).** A 12 mL screw neck vial was flushed with argon and charged with iodopyrazole **4q** (0.177 g, 0.35 mmol), phenylacetylene (0.042 g, 0.42 mmol), Et<sub>3</sub>N (0.071 g, 0.7 mmol), MeCN (2.5 mL), Pd(PPh<sub>3</sub>)<sub>2</sub>Cl<sub>2</sub> (0.012 g, 0.0175 mmol, 5 mol%), CuI (0.0067 g, 0.035 mmol, 10 mol%). The vial was repeatedly flushed with argon, close tightly and heated at 80 °C for 14 h. The cooled reaction mixture was dispersed between CH<sub>2</sub>Cl<sub>2</sub> and water (both 50 mL) and filtered through celite. Organic layer was separated, the water layer was extracted with CH<sub>2</sub>Cl<sub>2</sub> (3x20 mL), combined extract was washed with 0.1 M HCl (50 mL) and dried over Na<sub>2</sub>SO<sub>4</sub>. Volatiles were evaporated in vacuo, the residue was purified by column chromatography on silica gel using mixture of CH<sub>2</sub>Cl<sub>2</sub> and MeOH (30:1). Evaporation of the solvents gave compound **9** as white powder, 0.126 g, 75% yield; m.p. 233-235 °C. <sup>1</sup>H NMR (600.1 MHz, CD<sub>3</sub>CN) δ 2.37 (s, 3H, Me), 5.67 (br s, 2H, NH<sub>2</sub>), 7.27-7.29 (m, 2H, 4-MeC<sub>6</sub>H<sub>4</sub>), 7.34 (d, *J*<sub>HH</sub> = 8.1 Hz, 2H, 4-MeC<sub>6</sub>H<sub>4</sub>), 7.37-7.40 (m, 3H, Ph), 7.41-7.44 (m, 2H, Ph), 7.49 (d, *J*<sub>HH</sub> = 8.9 Hz, 2H, 4-(SO<sub>2</sub>NH<sub>2</sub>)C<sub>6</sub>H<sub>4</sub>), 7.88 (d, *J*<sub>HH</sub> = 8.9 Hz, 2H, 4-(SO<sub>2</sub>NH<sub>2</sub>)C<sub>6</sub>H<sub>4</sub>); <sup>13</sup>C NMR (150.9 MHz, CD<sub>3</sub>CN) δ 21.4, 78.5, 95.1, 103.6, 122.1 (q, *J*<sub>CF</sub> = 269.6 Hz, CF<sub>3</sub>), 123.2, 125.3, 126.9, 128.1, 129.6, 129.9, 130.4, 130.5, 132.1, 141.4, 142.6, 144.0 (q, *J*<sub>CF</sub> = 36.7 Hz, C-CF<sub>3</sub>), 144.3, 148.2; <sup>19</sup>F NMR (376.3 MHz, CDCl<sub>3</sub>) δ -61.5; HRMS (ESI): m/z calcd for C<sub>25</sub>H<sub>19</sub>F<sub>3</sub>N<sub>3</sub>O<sub>2</sub>S<sup>+</sup> [M+H<sup>+</sup>]: 482.1145; found: 482.1147.

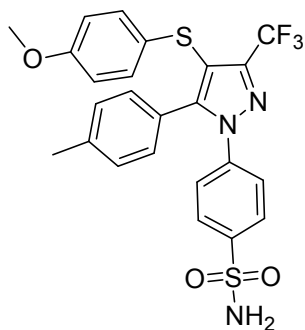

**4-[4-[(4-Methoxyphenyl)thio]-5-(4-methylphenyl)-3-(trifluoromethyl)-1H-pyrazol-1-yl]benzenesulfonamide (10).**

A 12 mL screw neck vial was flushed with argon and charged with iodopyrazole **4q** (0.177 g, 0.35 mmol), 4-methoxybenzenethiol (0.074 g, 0.53 mmol), *i*-PrNEt<sub>2</sub> (0.141 g, 1.23 mmol), dioxane (4 mL), Pd(dba)<sub>2</sub> (0.010 g, 0.0175 mmol, 5 mol%), Xantphos (0.020 g, 0.035 mmol, 10 mol%). The vial was repeatedly flushed with argon, close tightly and heated at 100 °C for 6 h. The cooled reaction mixture was dispersed between CH<sub>2</sub>Cl<sub>2</sub> and water (both 50 mL) and filtered through celite. Organic layer was separated, the water layer was extracted with CH<sub>2</sub>Cl<sub>2</sub> (3x20 mL), combined extract was washed with 0.1 M HCl (50 mL) and dried over Na<sub>2</sub>SO<sub>4</sub>. Volatiles were evaporated in vacuo, the residue was purified by column chromatography on silica gel using mixture of CH<sub>2</sub>Cl<sub>2</sub> and MeOH (30:1). Evaporation of the solvents gave compound **10** as white powder, 0.153 g, 84% yield; m.p. 137-139 °C. <sup>1</sup>H NMR (600.1 MHz, CDCl<sub>3</sub>) δ 2.37 (s, 3H, Me), 3.73 (s, 3H, Me), 5.00 (br s, 2H, NH<sub>2</sub>), 6.71 (d, *J*<sub>HH</sub> = 8.9 Hz, 2H, 4-MeOC<sub>6</sub>H<sub>4</sub>), 7.01 (d, *J*<sub>HH</sub> = 8.9 Hz, 2H, 4-MeOC<sub>6</sub>H<sub>4</sub>), 7.04 (d, *J*<sub>HH</sub> = 8.0 Hz, 2H, 4-MeC<sub>6</sub>H<sub>4</sub>), 7.15 (d, *J*<sub>HH</sub> = 8.0 Hz, 2H, 4-MeC<sub>6</sub>H<sub>4</sub>), 7.39 (d, *J*<sub>HH</sub> = 9.0 Hz, 2H, 4-(SO<sub>2</sub>NH<sub>2</sub>)C<sub>6</sub>H<sub>4</sub>), 7.83 (d, *J*<sub>HH</sub> = 9.0 Hz, 2H, 4-(SO<sub>2</sub>NH<sub>2</sub>)C<sub>6</sub>H<sub>4</sub>); <sup>13</sup>C NMR (150.9 MHz, CDCl<sub>3</sub>) δ 21.4, 55.3, 111.1, 114.6, 120.8 (q, *J*<sub>CF</sub> = 269.6 Hz, CF<sub>3</sub>), 124.4, 125.2, 126.9, 127.4, 129.6, 130.1, 131.2, 140.2, 141.3, 142.3, 146.0 (q, *J*<sub>CF</sub> = 36.1 Hz, C-CF<sub>3</sub>), 148.9, 158.9; <sup>19</sup>F NMR (376.3 MHz, CDCl<sub>3</sub>) δ -62.8; HRMS (ESI): *m/z* calcd for C<sub>24</sub>H<sub>21</sub>F<sub>3</sub>N<sub>3</sub>O<sub>3</sub>S<sub>2</sub><sup>+</sup> [M+H<sup>+</sup>]: 520.0971; found: 520.0971.

|           |          |                |                                                               |
|-----------|----------|----------------|---------------------------------------------------------------|
| <b>FW</b> | 288.2672 | <b>Formula</b> | C <sub>16</sub> H <sub>11</sub> F <sub>3</sub> N <sub>2</sub> |
|-----------|----------|----------------|---------------------------------------------------------------|

|                               |                                     |                        |                      |                       |             |                             |         |
|-------------------------------|-------------------------------------|------------------------|----------------------|-----------------------|-------------|-----------------------------|---------|
| <b>Acquisition Time (sec)</b> | 2.5559                              | <b>Comment</b>         | Imported from UXMNR. |                       | <b>Date</b> | 17 Jun 2014 13:55:42        |         |
| <b>File Name</b>              | C:\BM_DATA\SPEC_BM\BM-504.H_001001r | <b>Frequency (MHz)</b> | 400.13               | <b>Nucleus</b>        | 1H          | <b>Number of Transients</b> | 4       |
| <b>Original Points Count</b>  | 16384                               | <b>Points Count</b>    | 65536                | <b>Pulse Sequence</b> | zg30        | <b>Solvent</b>              | DMSO-D6 |
| <b>Temperature (degree C)</b> | 27.000                              |                        |                      |                       |             | <b>Sweep Width (Hz)</b>     | 6410.26 |

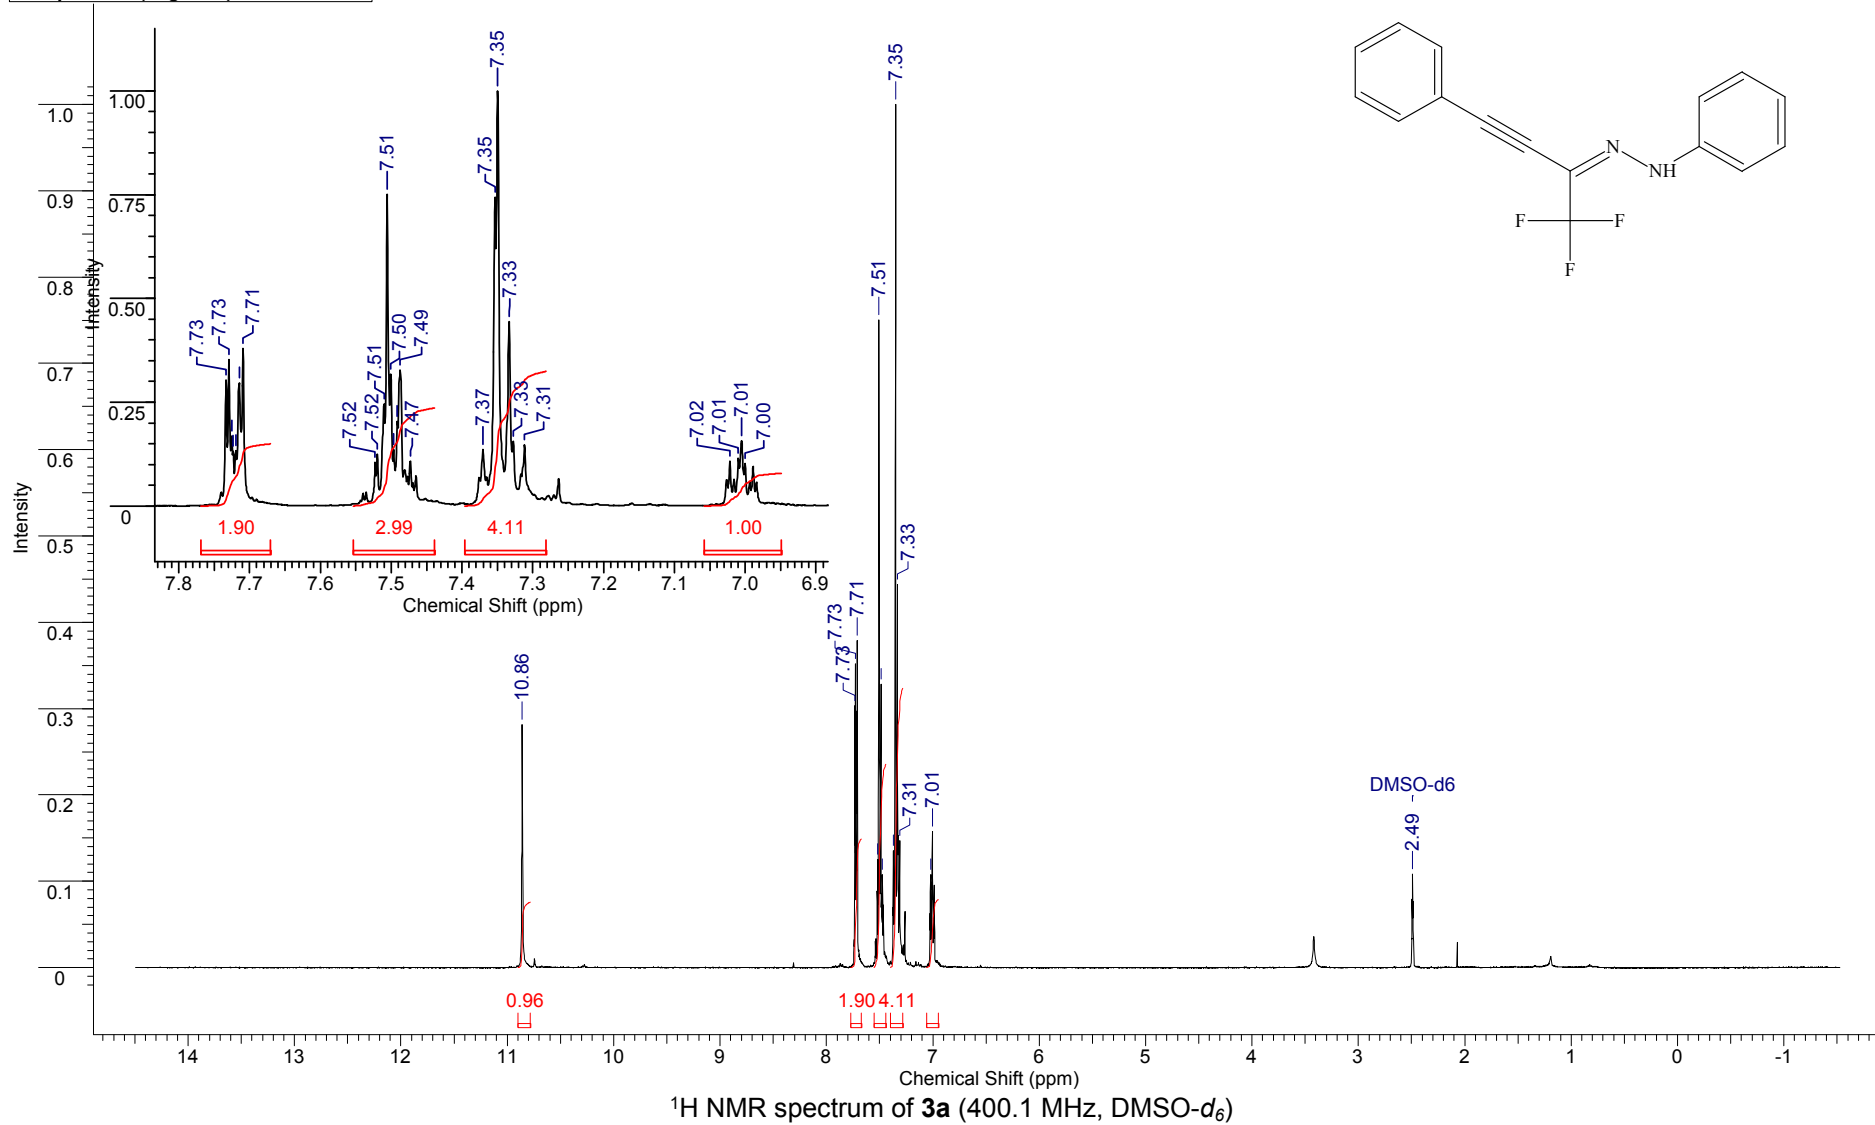

FW 288.2672 Formula C<sub>16</sub>H<sub>11</sub>F<sub>3</sub>N<sub>2</sub>

|                        |        |                |             |                      |                                                                  |                       |          |
|------------------------|--------|----------------|-------------|----------------------|------------------------------------------------------------------|-----------------------|----------|
| Acquisition Time (sec) | 2.0000 | Date           | Jun 17 2014 | File Name            | C:\BM_DATA\SPECTRA\19F\2014.06.17\BM-504_20140617_01\FLUORINE_01 |                       |          |
| Frequency (MHz)        | 376.31 | Nucleus        | 19F         | Number of Transients | 16                                                               | Original Points Count | 178571   |
| Points Count           | 262144 | Pulse Sequence | s2pul       | Solvent              | DMSO-D6                                                          | Sweep Width (Hz)      | 89285.71 |
| Temperature (degree C) | 50.000 |                |             |                      |                                                                  |                       |          |

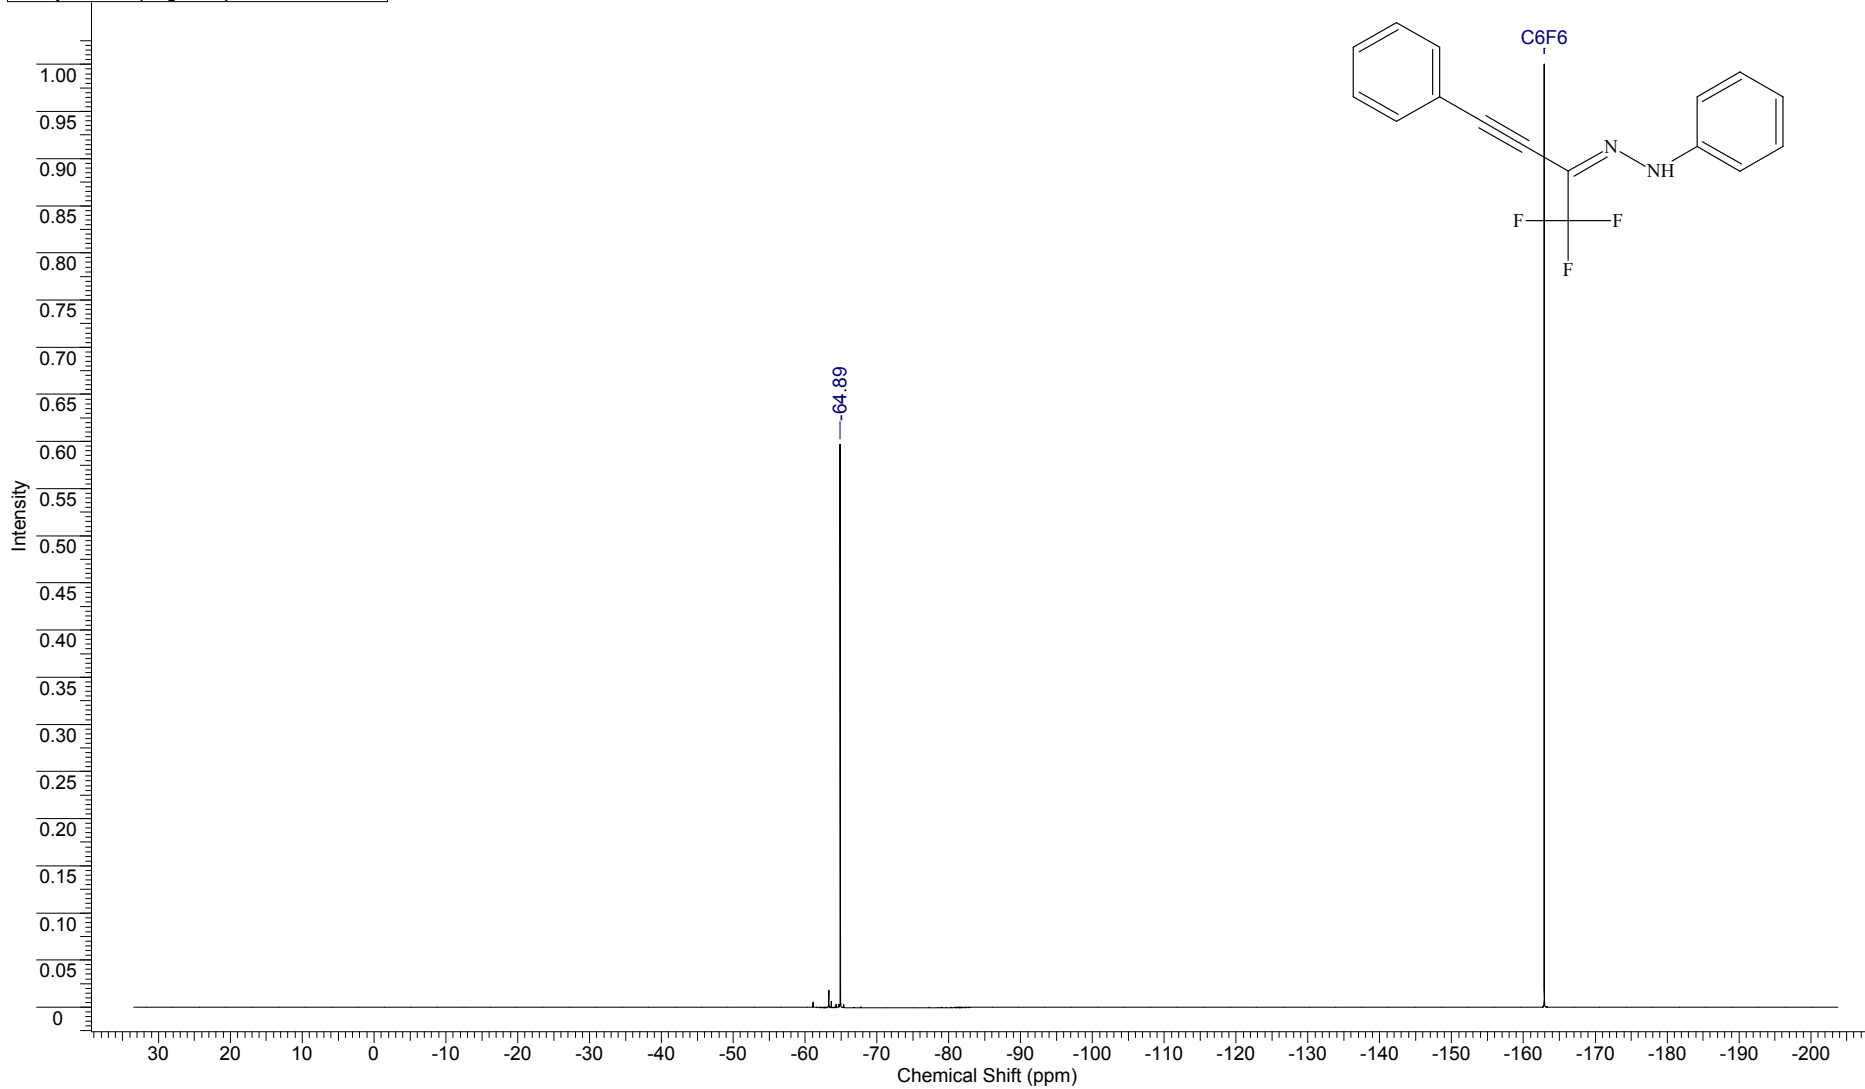

**FW** 322.7120 **Formula** C<sub>16</sub>H<sub>10</sub>ClF<sub>3</sub>N<sub>2</sub>

|                               |                                                           |                             |                      |                              |                      |
|-------------------------------|-----------------------------------------------------------|-----------------------------|----------------------|------------------------------|----------------------|
| <b>Acquisition Time (sec)</b> | 2.5559                                                    | <b>Comment</b>              | Imported from UXMNR. | <b>Date</b>                  | 25 Mar 2017 13:27:26 |
| <b>File Name</b>              | C:\BM_DATA\DOCS\SPEC_BM_H,C_I-IV.2017\BM-1020-1.H_001001r |                             |                      | <b>Frequency (MHz)</b>       | 400.13               |
| <b>Nucleus</b>                | 1H                                                        | <b>Number of Transients</b> | 4                    | <b>Original Points Count</b> | 16384                |
| <b>Pulse Sequence</b>         | zg30                                                      | <b>Solvent</b>              | CHLOROFORM-D         | <b>Points Count</b>          | 65536                |
| <b>Temperature (degree C)</b> | 27.000                                                    |                             |                      | <b>Sweep Width (Hz)</b>      | 6410.26              |

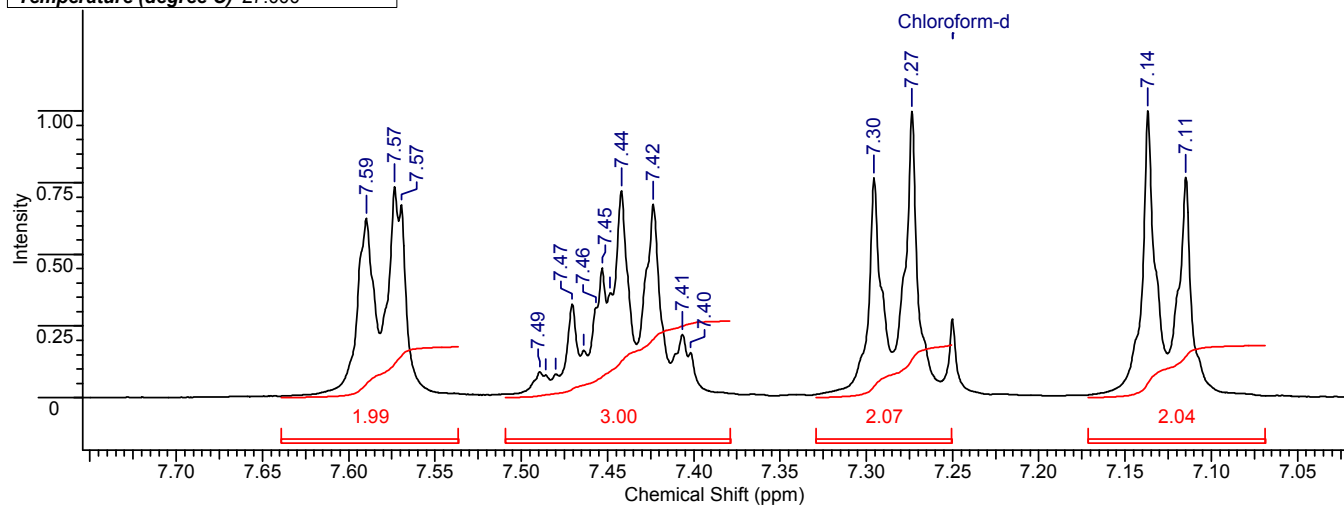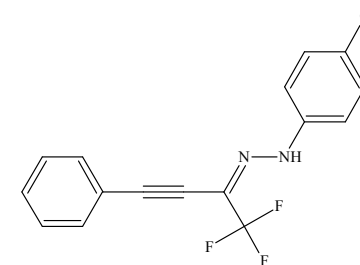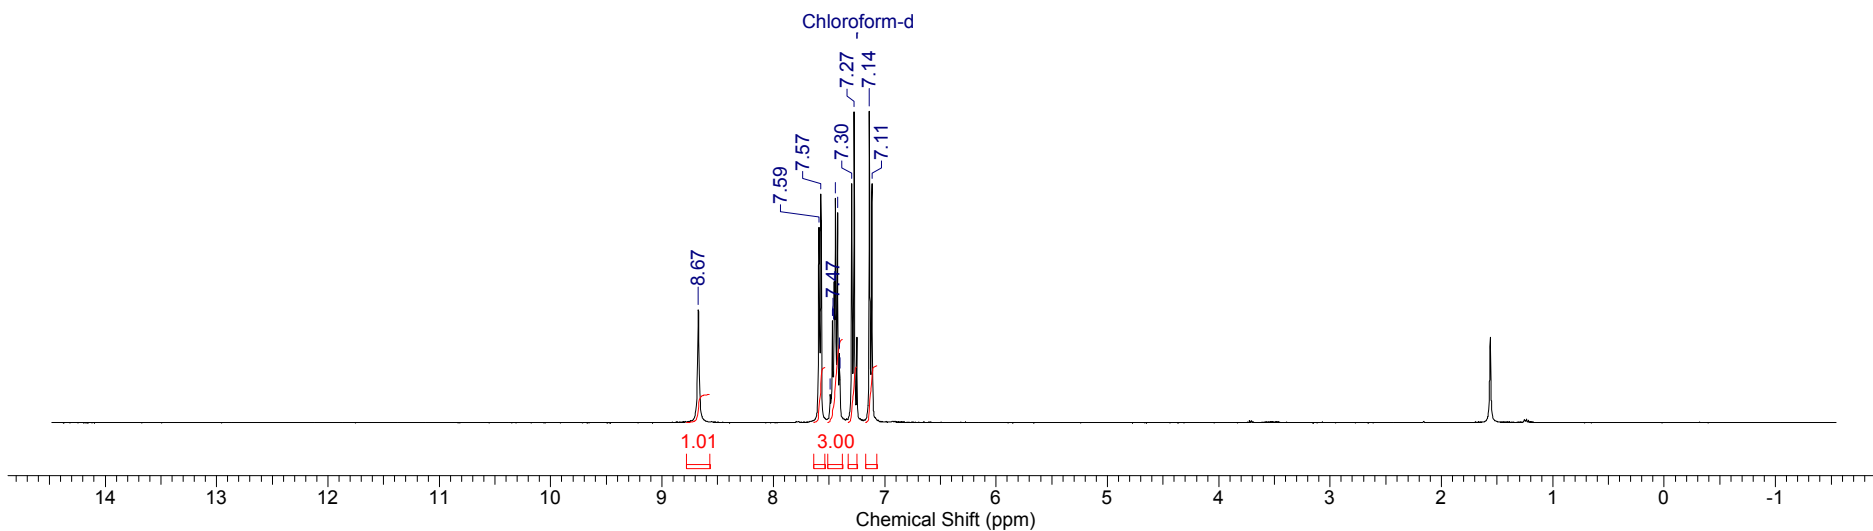

<sup>1</sup>H NMR spectrum of **3b** (400.1 MHz, CDCl<sub>3</sub>)



**FW** 322.7120 **Formula** C<sub>16</sub>H<sub>10</sub>ClF<sub>3</sub>N<sub>2</sub>

|                               |                                                           |                             |                      |                              |                      |
|-------------------------------|-----------------------------------------------------------|-----------------------------|----------------------|------------------------------|----------------------|
| <b>Acquisition Time (sec)</b> | 0.4999                                                    | <b>Comment</b>              | Imported from UXMNR. | <b>Date</b>                  | 25 Mar 2017 13:37:52 |
| <b>File Name</b>              | C:\BM_DATA\DOCS\SPEC_BM_H,C_I-IV.2017\BM-1020-1.C_002001r |                             |                      | <b>Frequency (MHz)</b>       | 100.61               |
| <b>Nucleus</b>                | 13C                                                       | <b>Number of Transients</b> | 367                  | <b>Original Points Count</b> | 12076                |
| <b>Pulse Sequence</b>         | zgpg30                                                    | <b>Solvent</b>              | CHLOROFORM-D         | <b>Points Count</b>          | 65536                |
| <b>Temperature (degree C)</b> | 27.000                                                    |                             |                      | <b>Sweep Width (Hz)</b>      | 24154.59             |

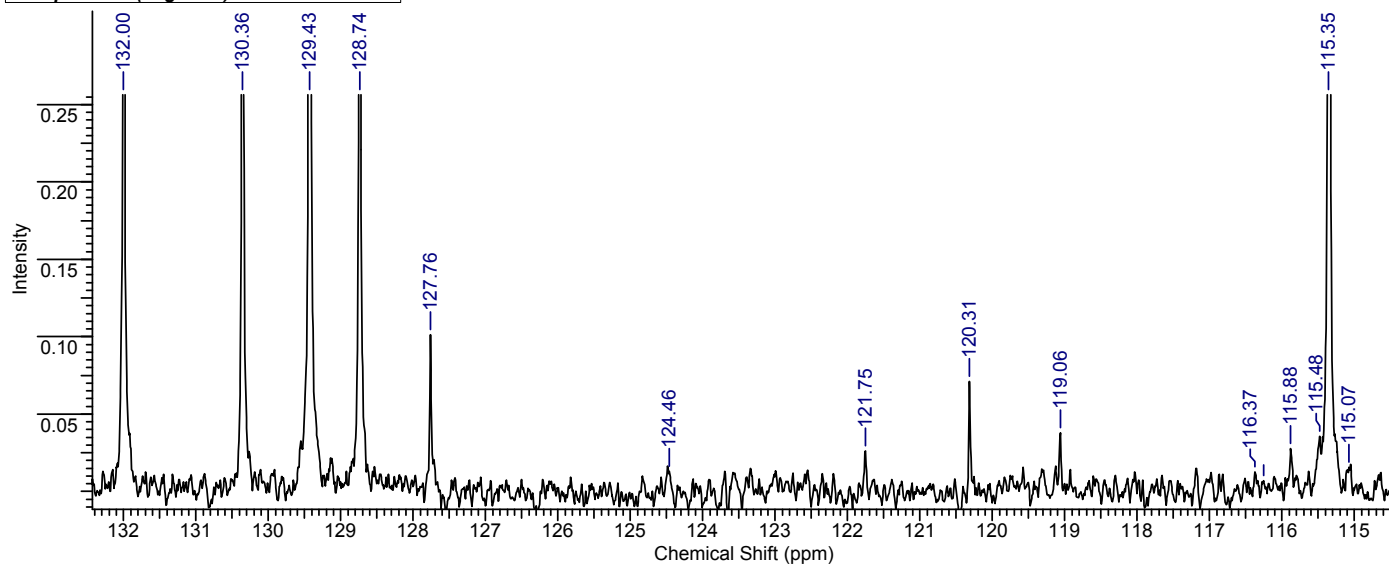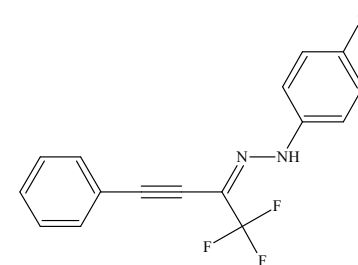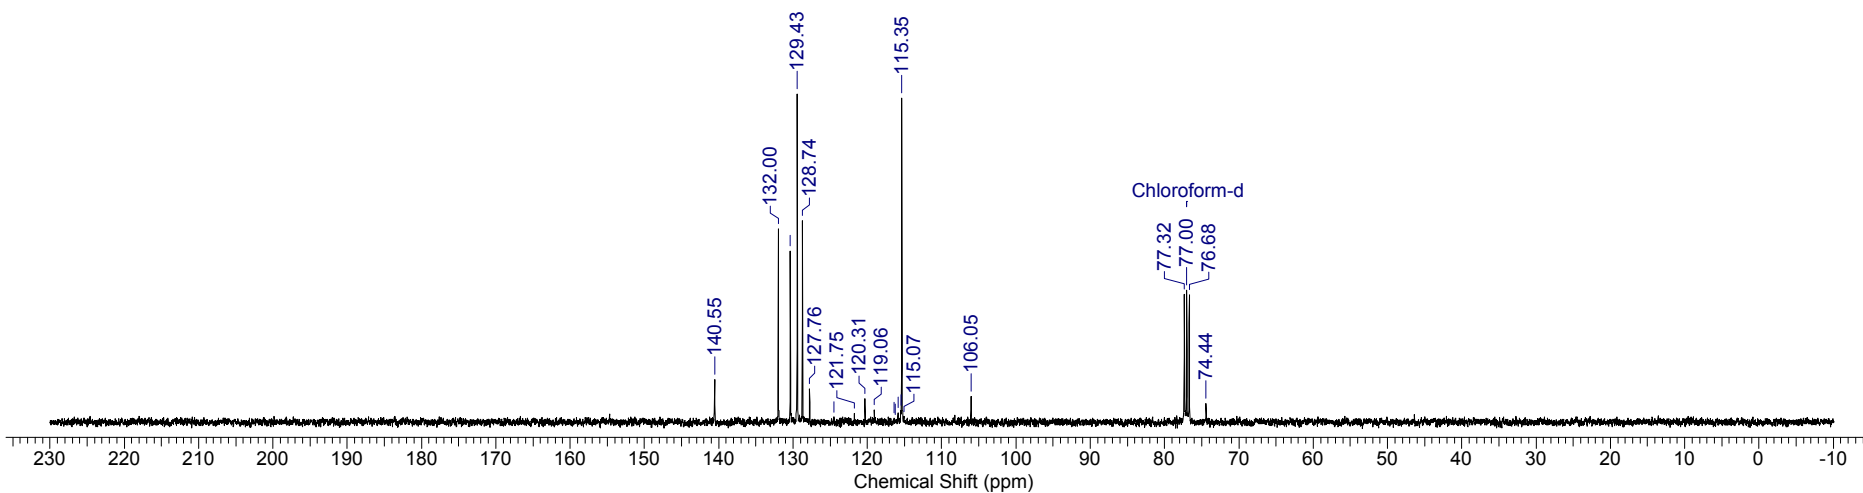

<sup>13</sup>C NMR spectrum of **3b** (100.6 MHz, CDCl<sub>3</sub>)

|           |          |                |                                                                 |
|-----------|----------|----------------|-----------------------------------------------------------------|
| <b>FW</b> | 322.7120 | <b>Formula</b> | C <sub>16</sub> H <sub>10</sub> ClF <sub>3</sub> N <sub>2</sub> |
|-----------|----------|----------------|-----------------------------------------------------------------|

|                               |          |                               |                 |                             |                                                                     |                              |       |
|-------------------------------|----------|-------------------------------|-----------------|-----------------------------|---------------------------------------------------------------------|------------------------------|-------|
| <b>Acquisition Time (sec)</b> | 0.7340   | <b>Date</b>                   | Apr 3 2017      | <b>File Name</b>            | C:\BM_DATA\DOCS\SPEC_F_I-XII.2017\BM-1020-1_20170403_01\FLUORINE_01 |                              |       |
| <b>Frequency (MHz)</b>        | 376.31   | <b>Nucleus</b>                | <sup>19</sup> F | <b>Number of Transients</b> | 10                                                                  | <b>Original Points Count</b> | 65536 |
| <b>Points Count</b>           | 65536    | <b>Pulse Sequence</b>         | s2pul           | <b>Solvent</b>              | CHLOROFORM-D                                                        |                              |       |
| <b>Sweep Width (Hz)</b>       | 89285.71 | <b>Temperature (degree C)</b> | 25.000          |                             |                                                                     |                              |       |

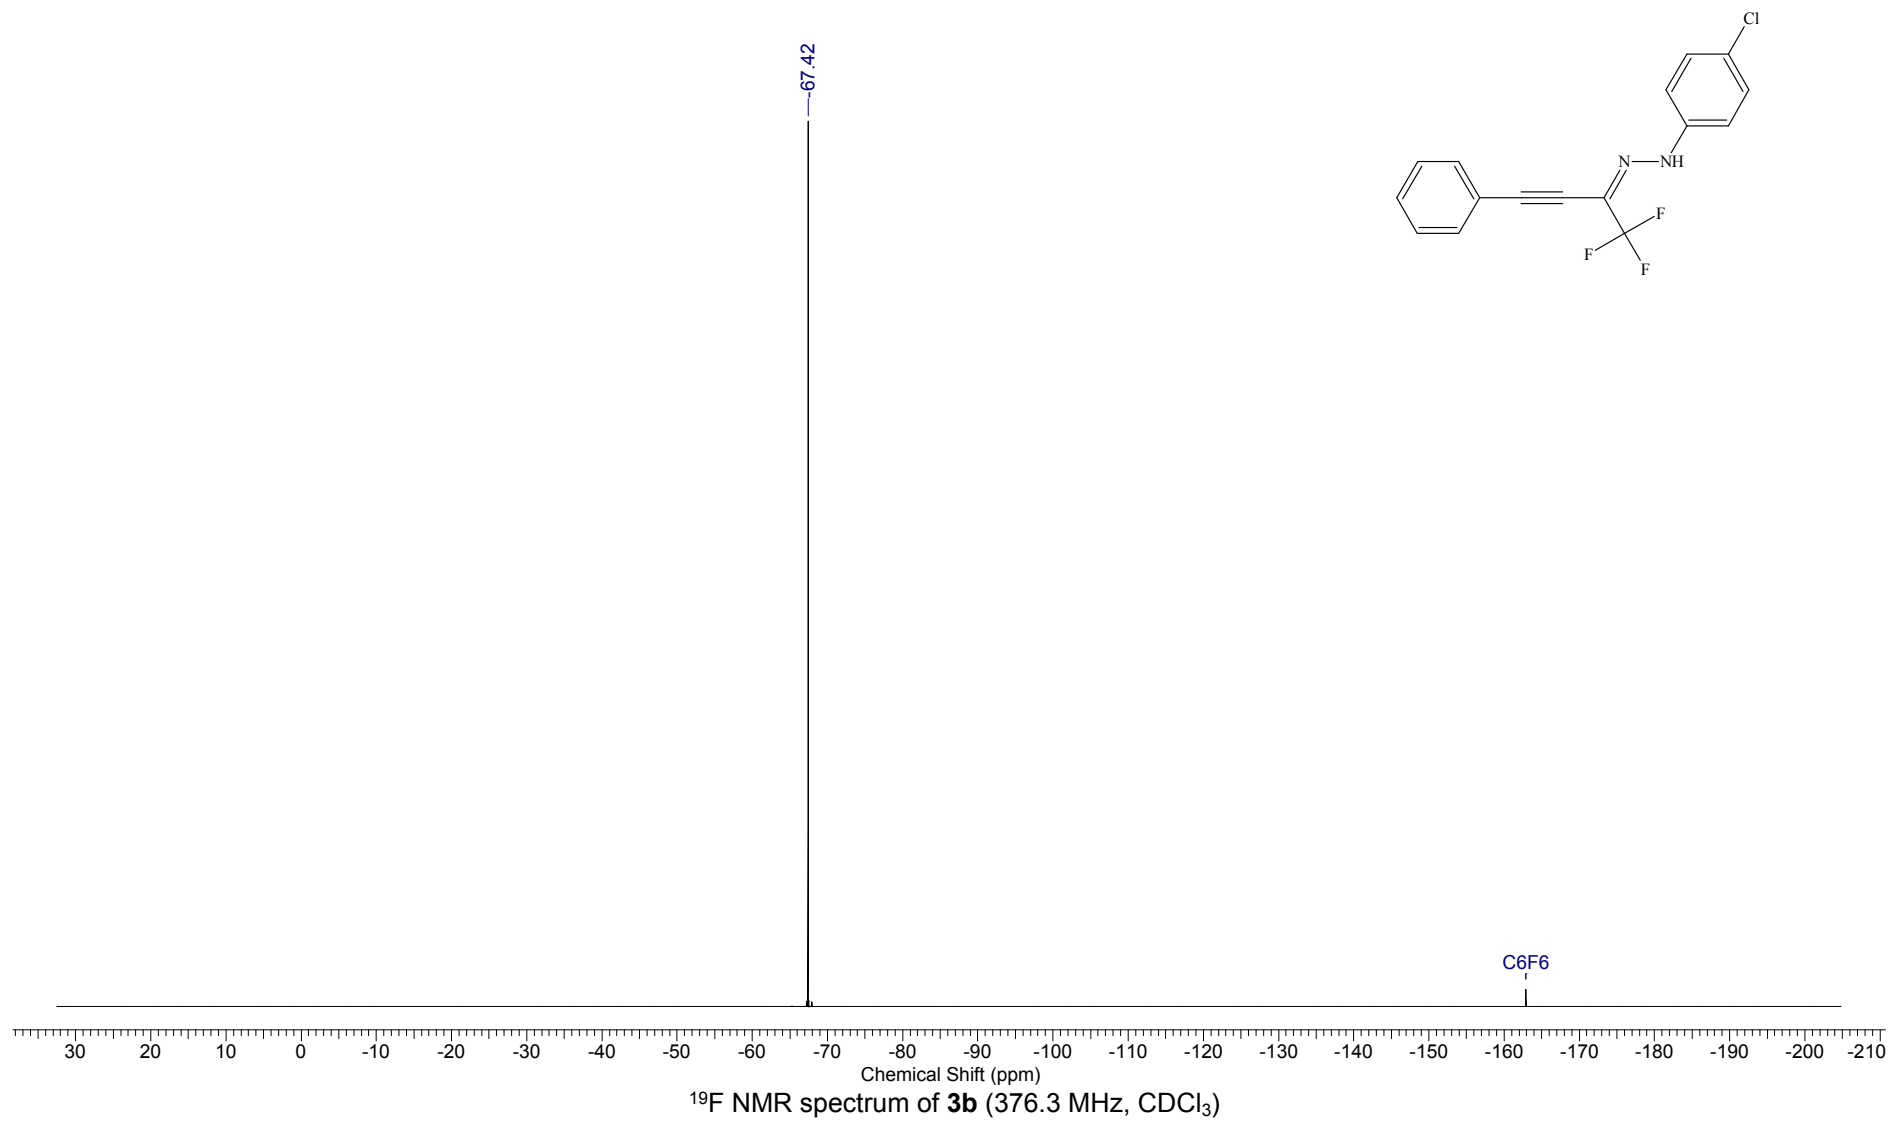

FW 306.2577 Formula  $C_{16}H_{10}F_4N_2$

| Acquisition Time (sec) | 2.9295                                 | Comment                | Imported from UXMNR. |                | Date | 26 Apr 2017 23:22:04 |              |
|------------------------|----------------------------------------|------------------------|----------------------|----------------|------|----------------------|--------------|
| File Name              | C:\BM_DATA\BM-1044-d\BM-1044-d_001001r | Frequency (MHz)        | 400.13               | Nucleus        | 1H   | Number of Transients | 8            |
| Original Points Count  | 16384                                  | Points Count           | 65536                | Pulse Sequence | zg30 | Solvent              | CHLOROFORM-D |
| Sweep Width (Hz)       | 5592.84                                | Temperature (degree C) | 27.000               |                |      |                      |              |

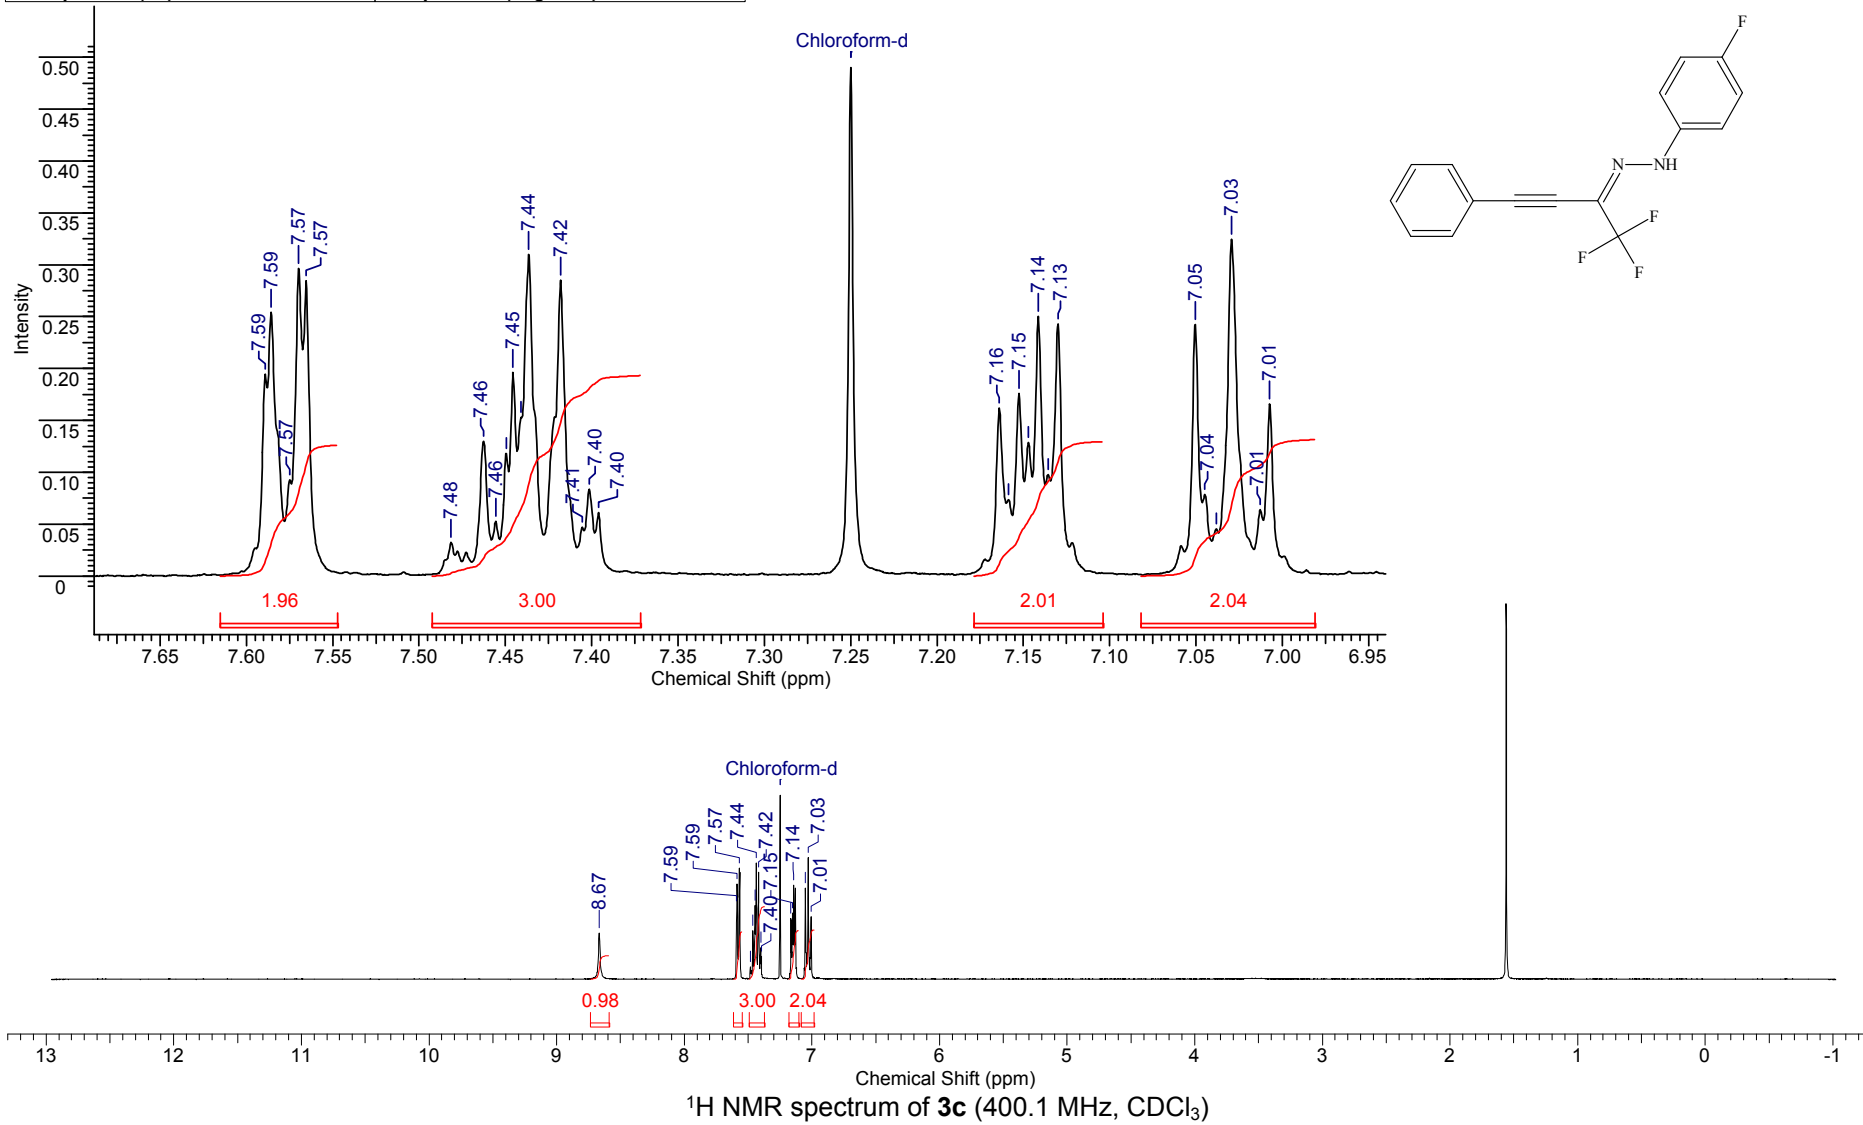

|           |          |                |                                                               |
|-----------|----------|----------------|---------------------------------------------------------------|
| <b>FW</b> | 306.2577 | <b>Formula</b> | C <sub>16</sub> H <sub>10</sub> F <sub>4</sub> N <sub>2</sub> |
|-----------|----------|----------------|---------------------------------------------------------------|

|                               |                                                         |                             |                      |                              |                         |                      |       |
|-------------------------------|---------------------------------------------------------|-----------------------------|----------------------|------------------------------|-------------------------|----------------------|-------|
| <b>Acquisition Time (sec)</b> | 0.4999                                                  | <b>Comment</b>              | Imported from UXMNR. |                              | <b>Date</b>             | 25 Apr 2017 15:58:36 |       |
| <b>File Name</b>              | C:\BM_DATA\DOCS\SPEC_BM_H,C_I-IV.2017\BM-1044.C_002001r |                             |                      | <b>Frequency (MHz)</b>       | 100.61                  |                      |       |
| <b>Nucleus</b>                | 13C                                                     | <b>Number of Transients</b> | 182                  | <b>Original Points Count</b> | 12076                   | <b>Points Count</b>  | 65536 |
| <b>Pulse Sequence</b>         | zpgg30                                                  | <b>Solvent</b>              | CHLOROFORM-D         |                              | <b>Sweep Width (Hz)</b> | 24154.59             |       |
| <b>Temperature (degree C)</b> | 27.000                                                  |                             |                      |                              |                         |                      |       |

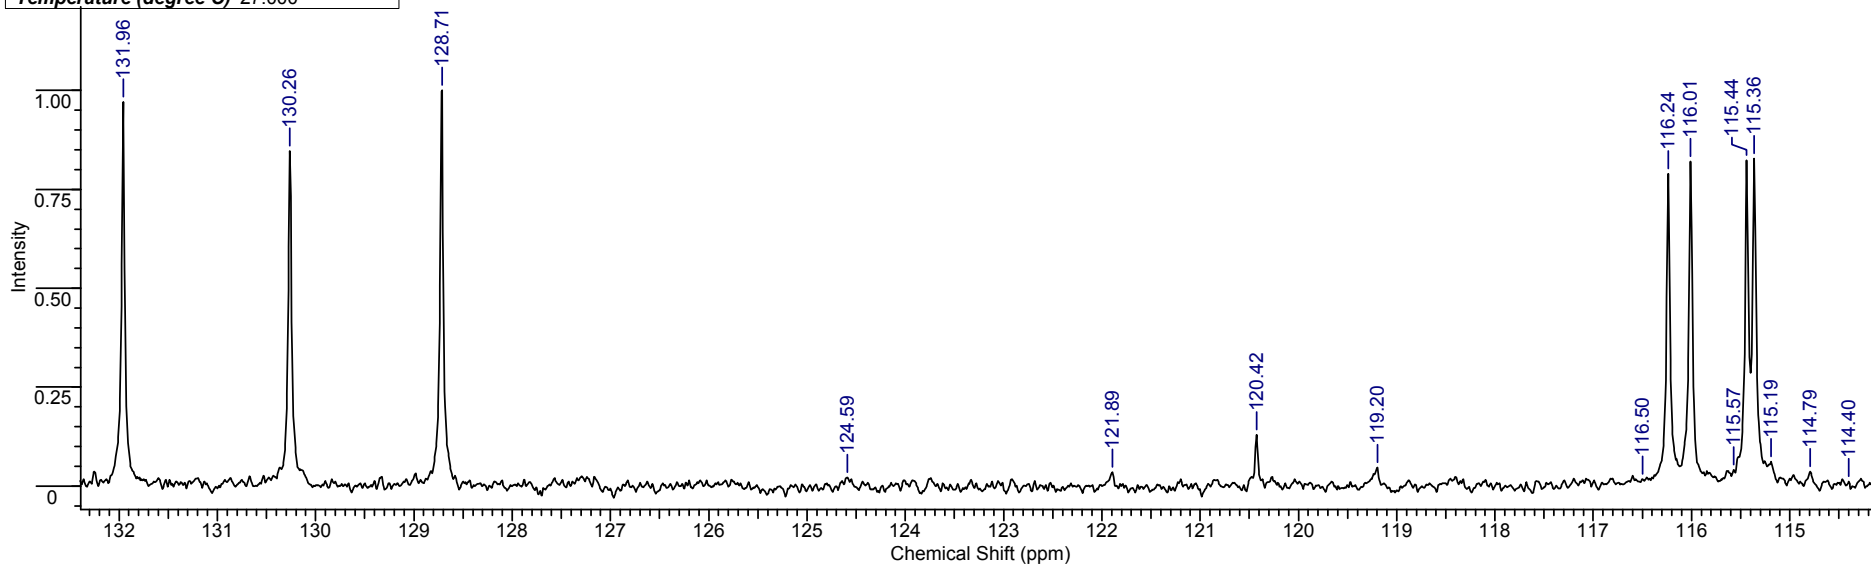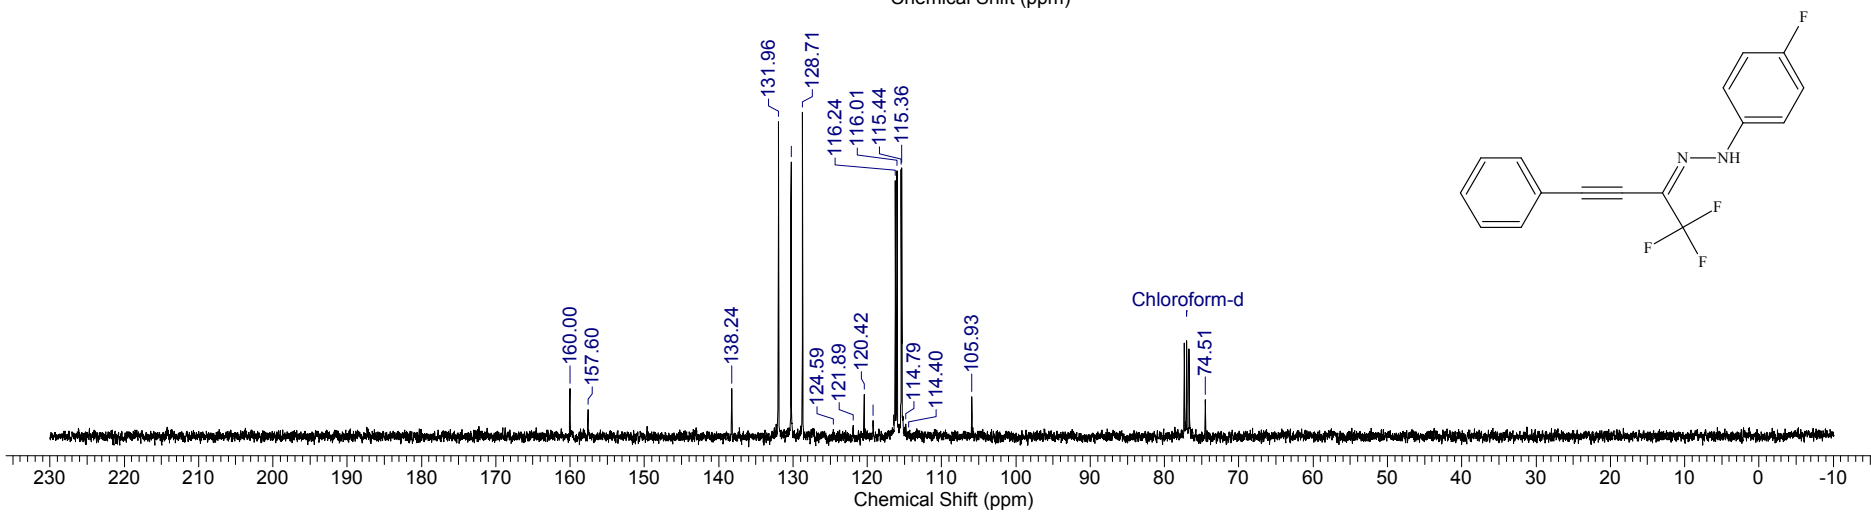

<sup>13</sup>C NMR spectrum of **3c** (100.6 MHz, CDCl<sub>3</sub>)

|           |          |                |                                                               |
|-----------|----------|----------------|---------------------------------------------------------------|
| <b>FW</b> | 306.2577 | <b>Formula</b> | C <sub>16</sub> H <sub>10</sub> F <sub>4</sub> N <sub>2</sub> |
|-----------|----------|----------------|---------------------------------------------------------------|

|                               |          |                               |             |                             |                                                                   |                              |        |
|-------------------------------|----------|-------------------------------|-------------|-----------------------------|-------------------------------------------------------------------|------------------------------|--------|
| <b>Acquisition Time (sec)</b> | 1.5000   | <b>Date</b>                   | Apr 26 2017 | <b>File Name</b>            | C:\BM_DATA\DOCS\SPEC_F_I-XII.2017\BM-1044_20170426_01\FLUORINE_01 |                              |        |
| <b>Frequency (MHz)</b>        | 376.31   | <b>Nucleus</b>                | 19F         | <b>Number of Transients</b> | 16                                                                | <b>Original Points Count</b> | 133929 |
| <b>Points Count</b>           | 262144   | <b>Pulse Sequence</b>         | s2pul       | <b>Solvent</b>              | CHLOROFORM-D                                                      |                              |        |
| <b>Sweep Width (Hz)</b>       | 89285.71 | <b>Temperature (degree C)</b> | 25.000      |                             |                                                                   |                              |        |

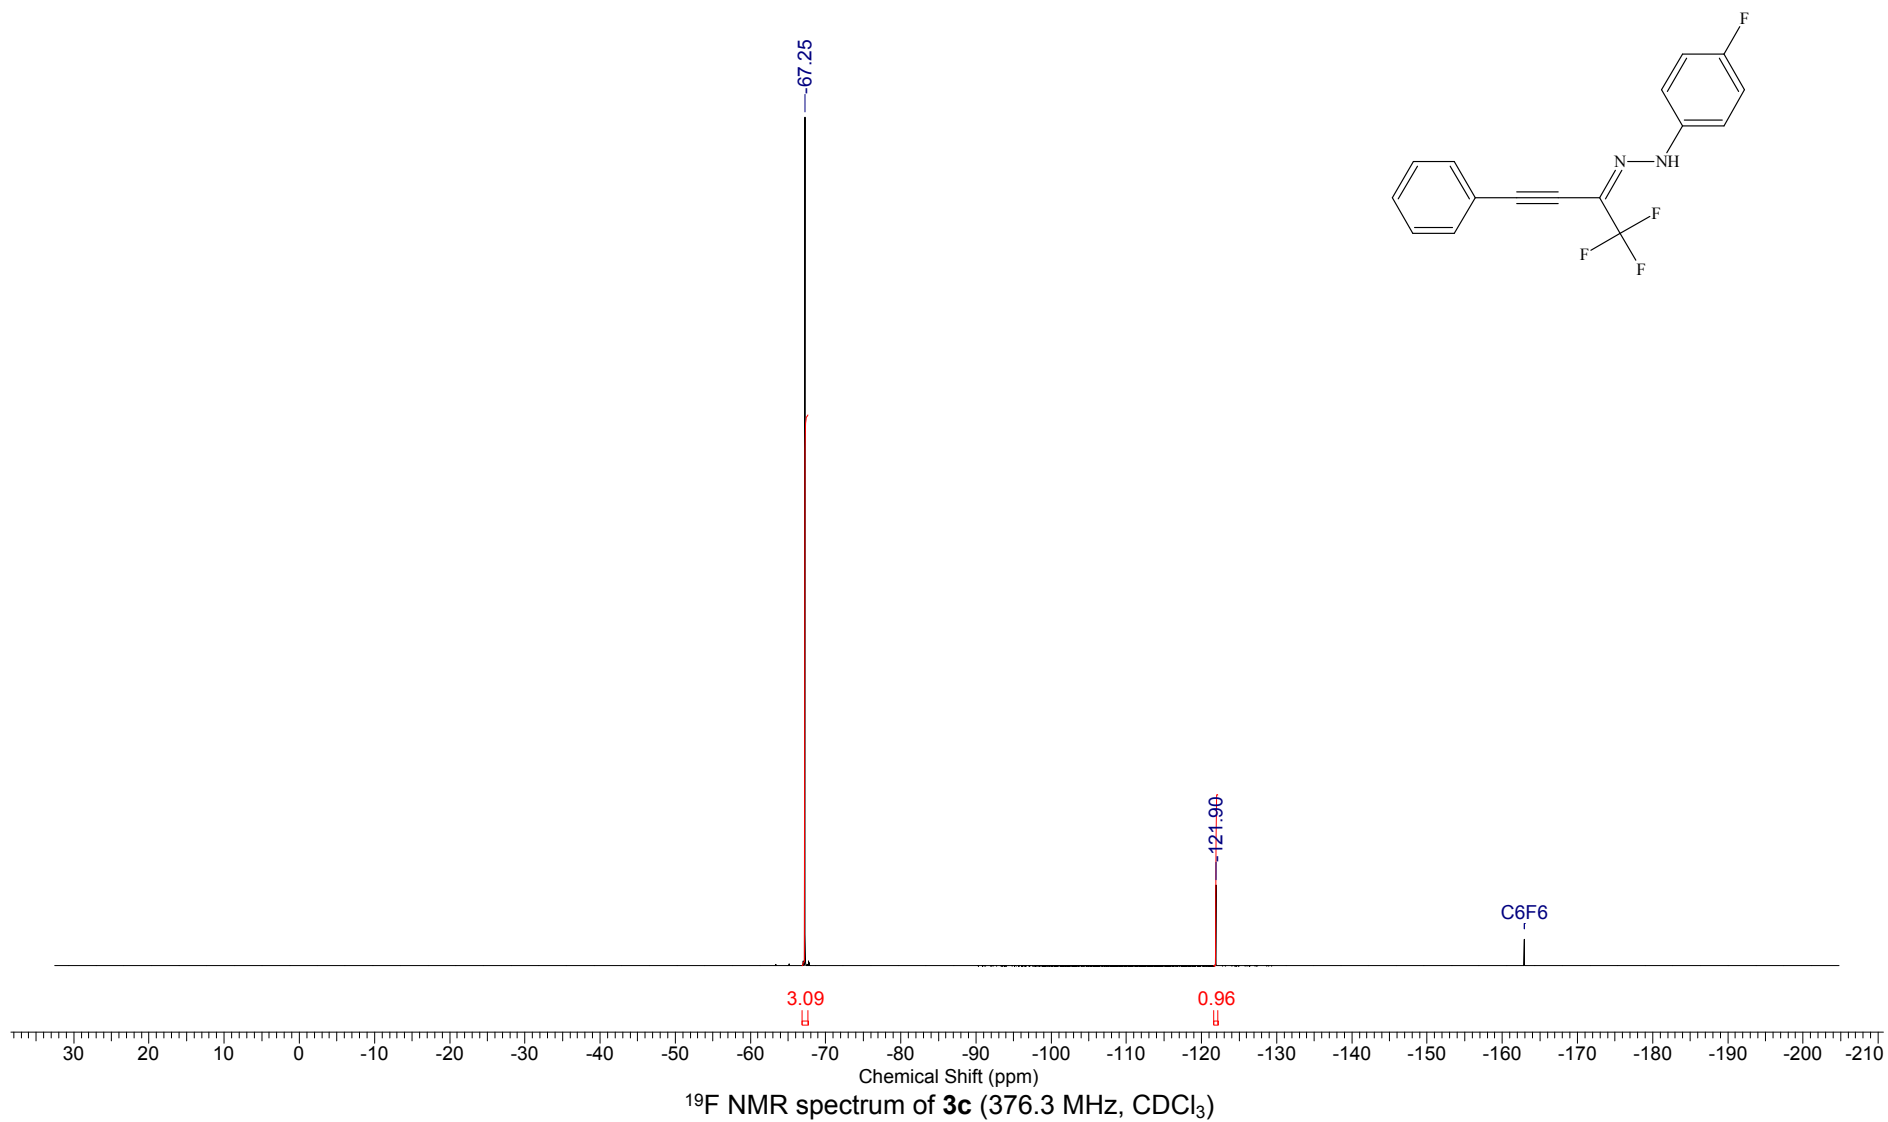

**FW** 302.2938 **Formula** C<sub>17</sub>H<sub>13</sub>F<sub>3</sub>N<sub>2</sub>

|                               |                                                          |                             |                      |                              |             |                               |        |
|-------------------------------|----------------------------------------------------------|-----------------------------|----------------------|------------------------------|-------------|-------------------------------|--------|
| <b>Acquisition Time (sec)</b> | 2.5559                                                   | <b>Comment</b>              | Imported from UXNMR. |                              | <b>Date</b> | 25 Apr 2017 15:00:58          |        |
| <b>File Name</b>              | C:\IBM_DATA\DOCS\SPEC_BM_H,C_I-IV.2017\BM-1043.H_001001r |                             |                      | <b>Frequency (MHz)</b>       | 400.13      |                               |        |
| <b>Nucleus</b>                | 1H                                                       | <b>Number of Transients</b> | 4                    | <b>Original Points Count</b> | 16384       | <b>Points Count</b>           | 65536  |
| <b>Pulse Sequence</b>         | zg30                                                     | <b>Solvent</b>              | DMSO-D6              | <b>Sweep Width (Hz)</b>      | 6410.26     | <b>Temperature (degree C)</b> | 27.000 |

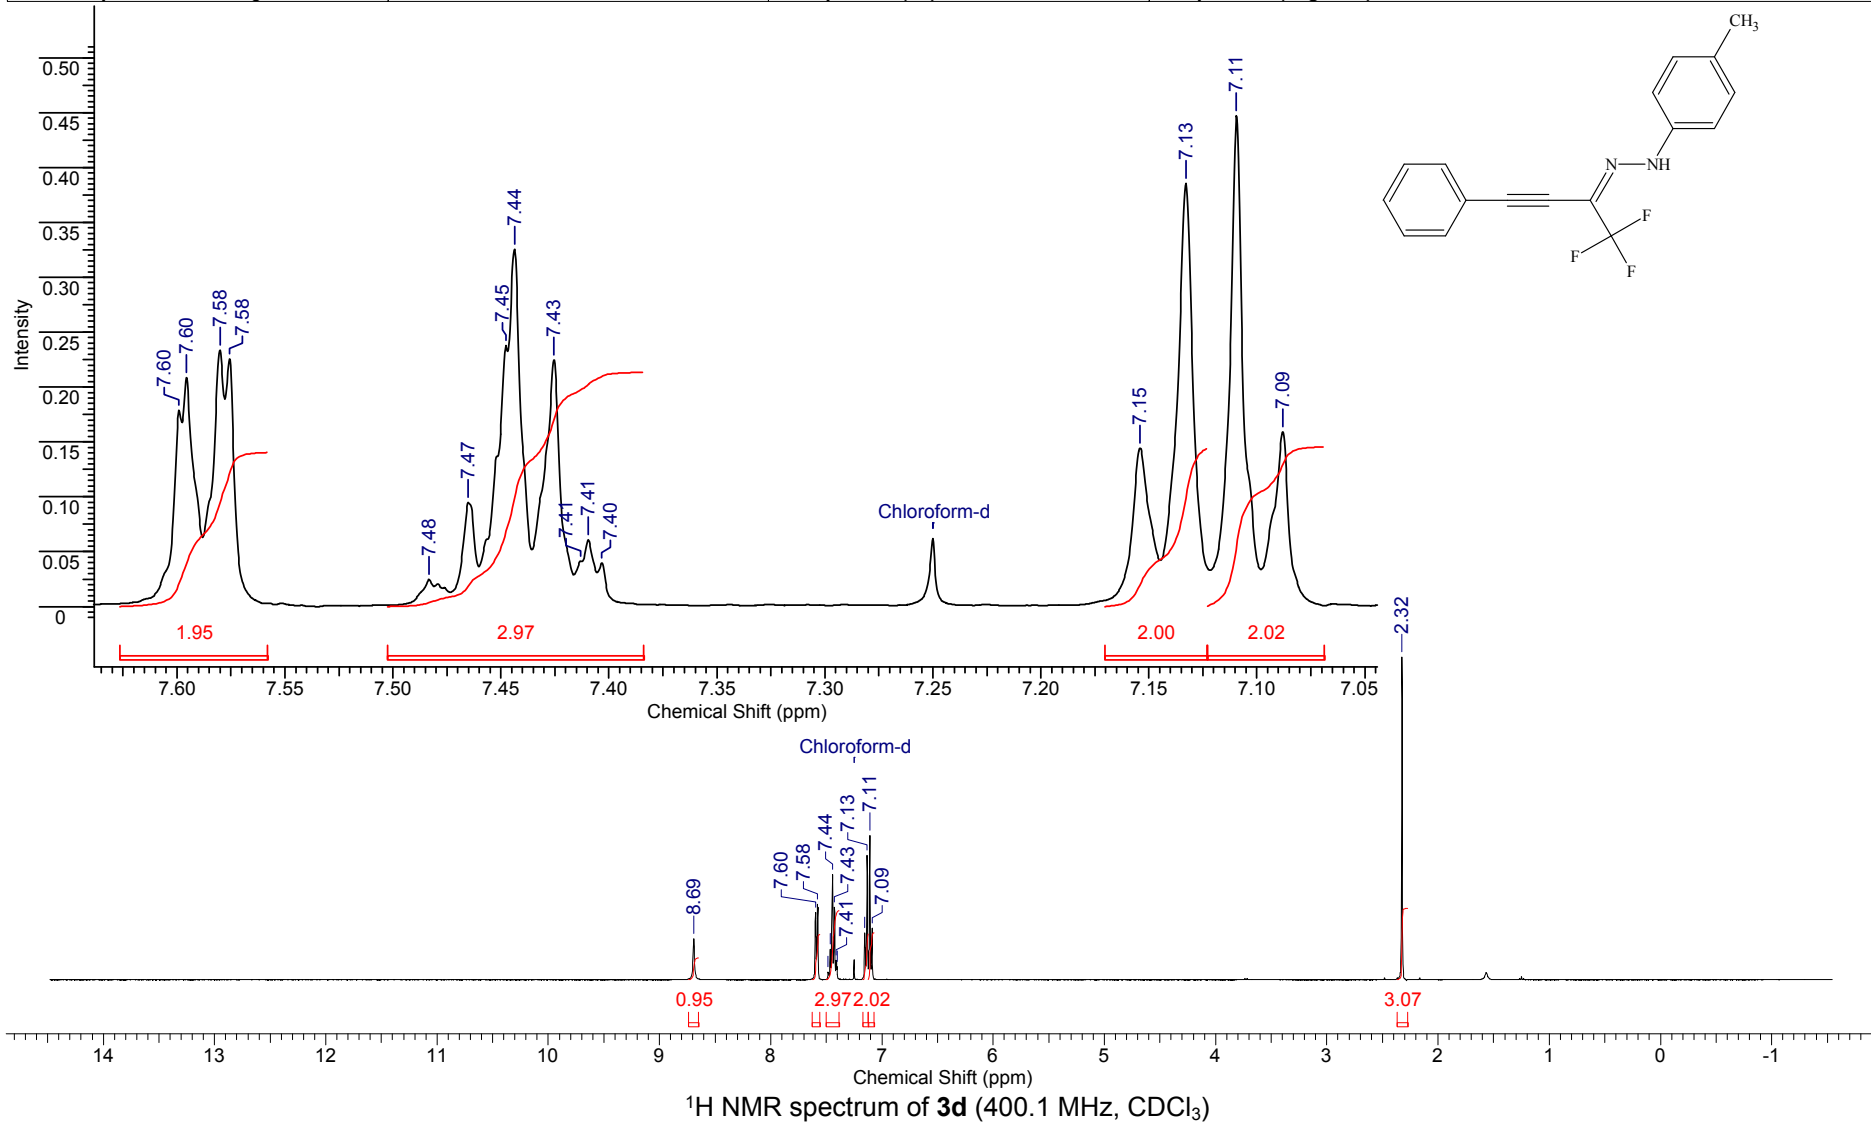

|           |          |                |                                                               |
|-----------|----------|----------------|---------------------------------------------------------------|
| <b>FW</b> | 302.2938 | <b>Formula</b> | C <sub>17</sub> H <sub>13</sub> F <sub>3</sub> N <sub>2</sub> |
|-----------|----------|----------------|---------------------------------------------------------------|

|                               |                                                         |                             |                      |                              |                      |
|-------------------------------|---------------------------------------------------------|-----------------------------|----------------------|------------------------------|----------------------|
| <b>Acquisition Time (sec)</b> | 0.4999                                                  | <b>Comment</b>              | Imported from UXMNR. | <b>Date</b>                  | 25 Apr 2017 15:11:00 |
| <b>File Name</b>              | C:\BM_DATA\DOCS\SPEC_BM_H,C_I-IV.2017\BM-1043.C_002001r |                             |                      | <b>Frequency (MHz)</b>       | 100.61               |
| <b>Nucleus</b>                | 13C                                                     | <b>Number of Transients</b> | 350                  | <b>Original Points Count</b> | 12076                |
| <b>Pulse Sequence</b>         | zgpg30                                                  | <b>Solvent</b>              | CHLOROFORM-D         | <b>Points Count</b>          | 65536                |
| <b>Temperature (degree C)</b> | 27.000                                                  |                             |                      | <b>Sweep Width (Hz)</b>      | 24154.59             |

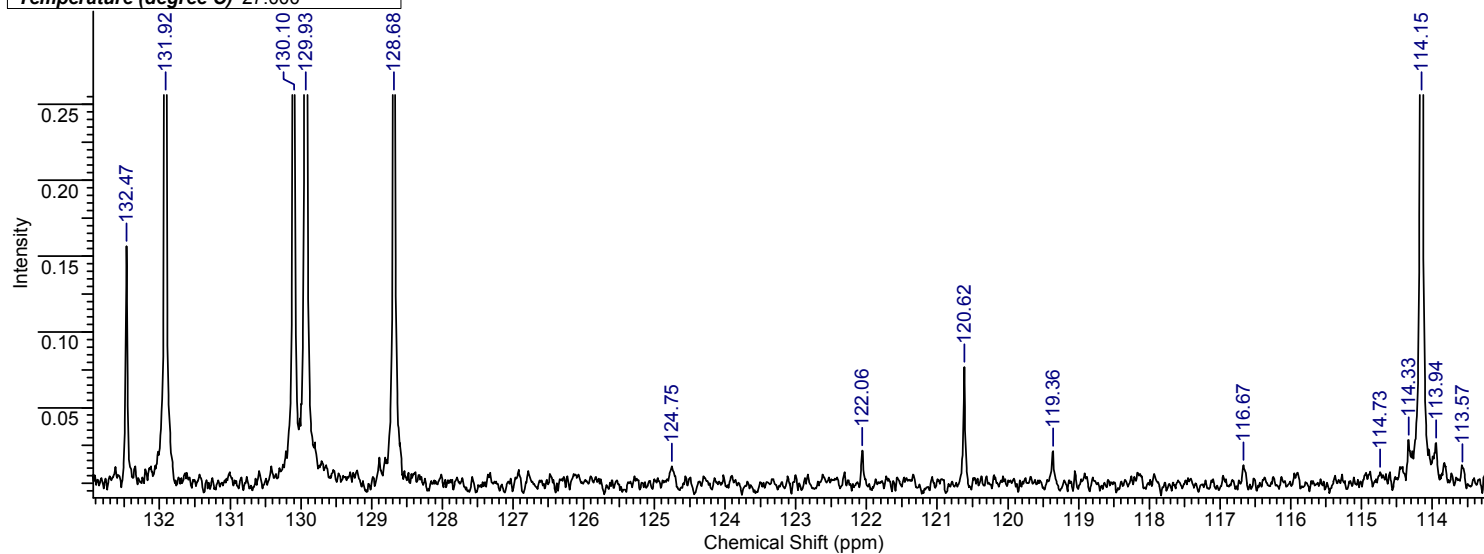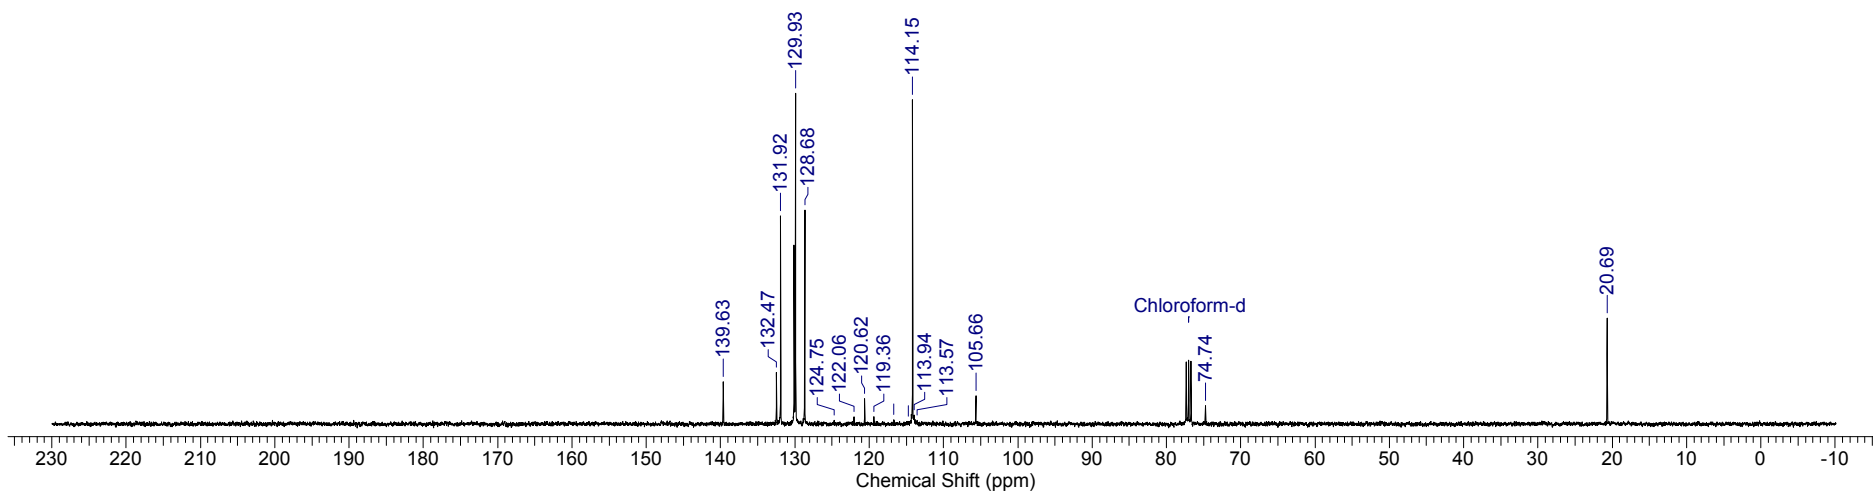

<sup>13</sup>C NMR spectrum of **3d** (100.6 MHz, CDCl<sub>3</sub>)

|           |          |                |                                                               |
|-----------|----------|----------------|---------------------------------------------------------------|
| <b>FW</b> | 302.2938 | <b>Formula</b> | C <sub>17</sub> H <sub>13</sub> F <sub>3</sub> N <sub>2</sub> |
|-----------|----------|----------------|---------------------------------------------------------------|

|                               |          |                               |             |                             |                                                                   |                              |        |
|-------------------------------|----------|-------------------------------|-------------|-----------------------------|-------------------------------------------------------------------|------------------------------|--------|
| <b>Acquisition Time (sec)</b> | 1.5000   | <b>Date</b>                   | Apr 26 2017 | <b>File Name</b>            | C:\BM_DATA\DOCS\SPEC_F_I-XII.2017\BM-1043_20170426_01\FLUORINE_01 |                              |        |
| <b>Frequency (MHz)</b>        | 376.31   | <b>Nucleus</b>                | 19F         | <b>Number of Transients</b> | 16                                                                | <b>Original Points Count</b> | 133929 |
| <b>Points Count</b>           | 262144   | <b>Pulse Sequence</b>         | s2pul       | <b>Solvent</b>              | CHLOROFORM-D                                                      |                              |        |
| <b>Sweep Width (Hz)</b>       | 89285.71 | <b>Temperature (degree C)</b> | 25.000      |                             |                                                                   |                              |        |

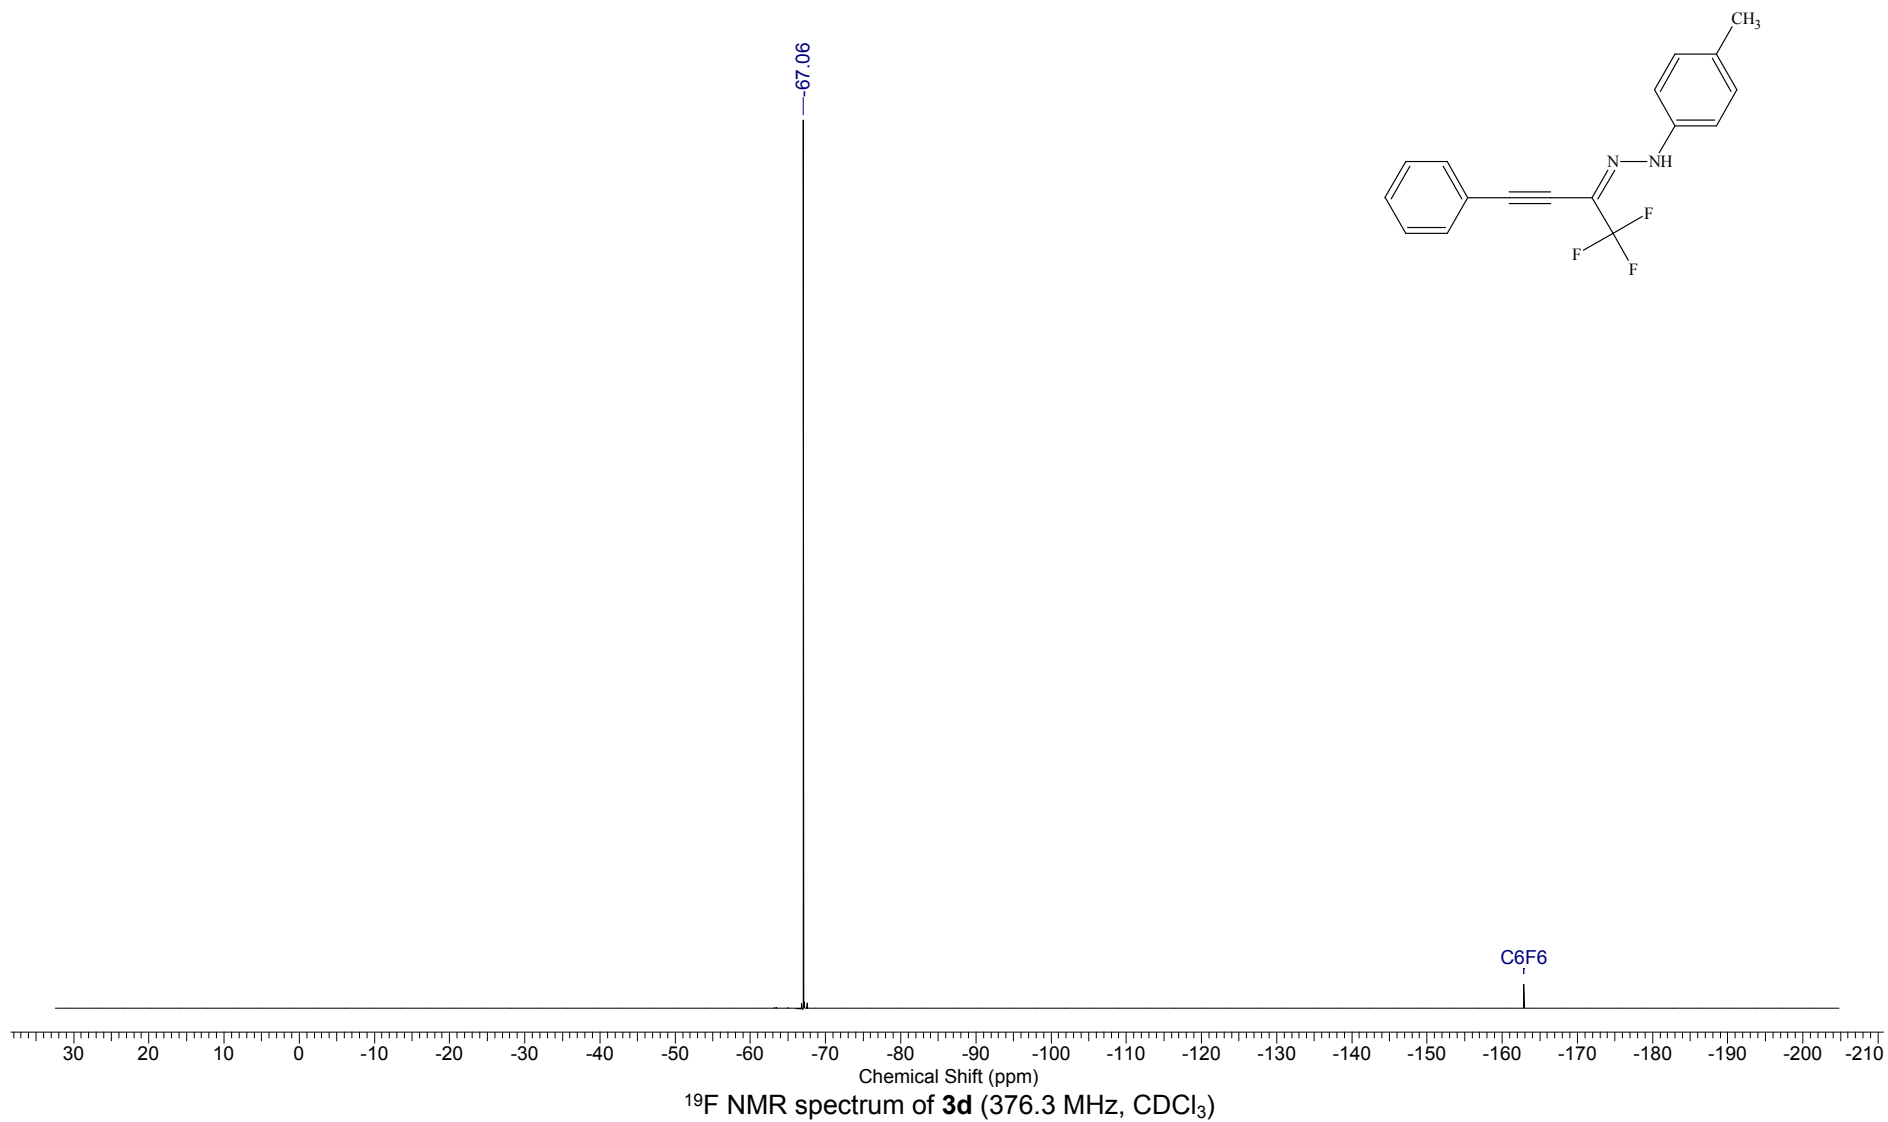



**FW** 318.2932 **Formula** C<sub>17</sub>H<sub>13</sub>F<sub>3</sub>N<sub>2</sub>O

| Acquisition Time (sec) | 2.9295                            | Comment                | Imported from UXNMR. |                | Date | 25 Apr 2017 22:28:06 |              |
|------------------------|-----------------------------------|------------------------|----------------------|----------------|------|----------------------|--------------|
| File Name              | C:\BM_DATA\170425\BM-1042_001001r | Frequency (MHz)        | 400.13               | Nucleus        | 1H   | Number of Transients | 8            |
| Original Points Count  | 16384                             | Points Count           | 65536                | Pulse Sequence | zg30 | Solvent              | CHLOROFORM-D |
| Sweep Width (Hz)       | 5592.84                           | Temperature (degree C) | 27.000               |                |      |                      |              |

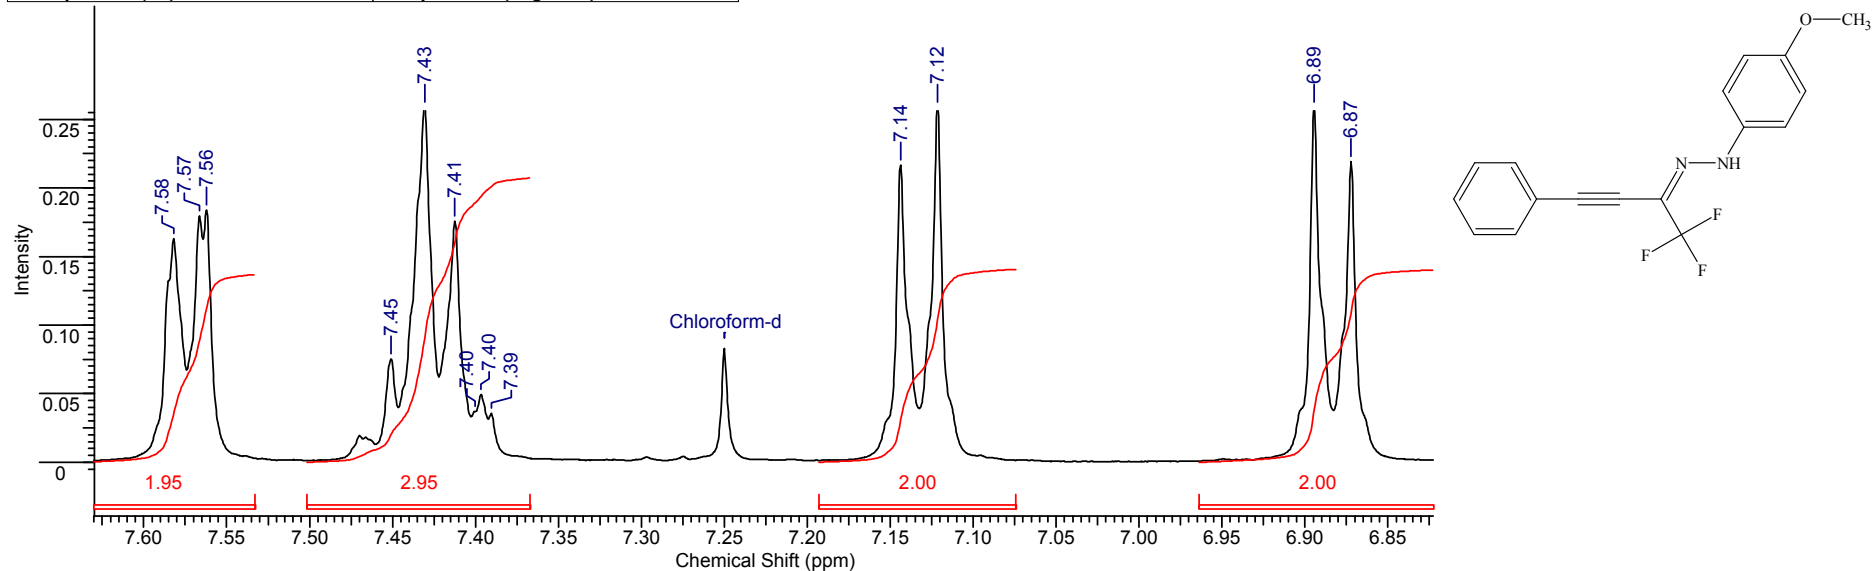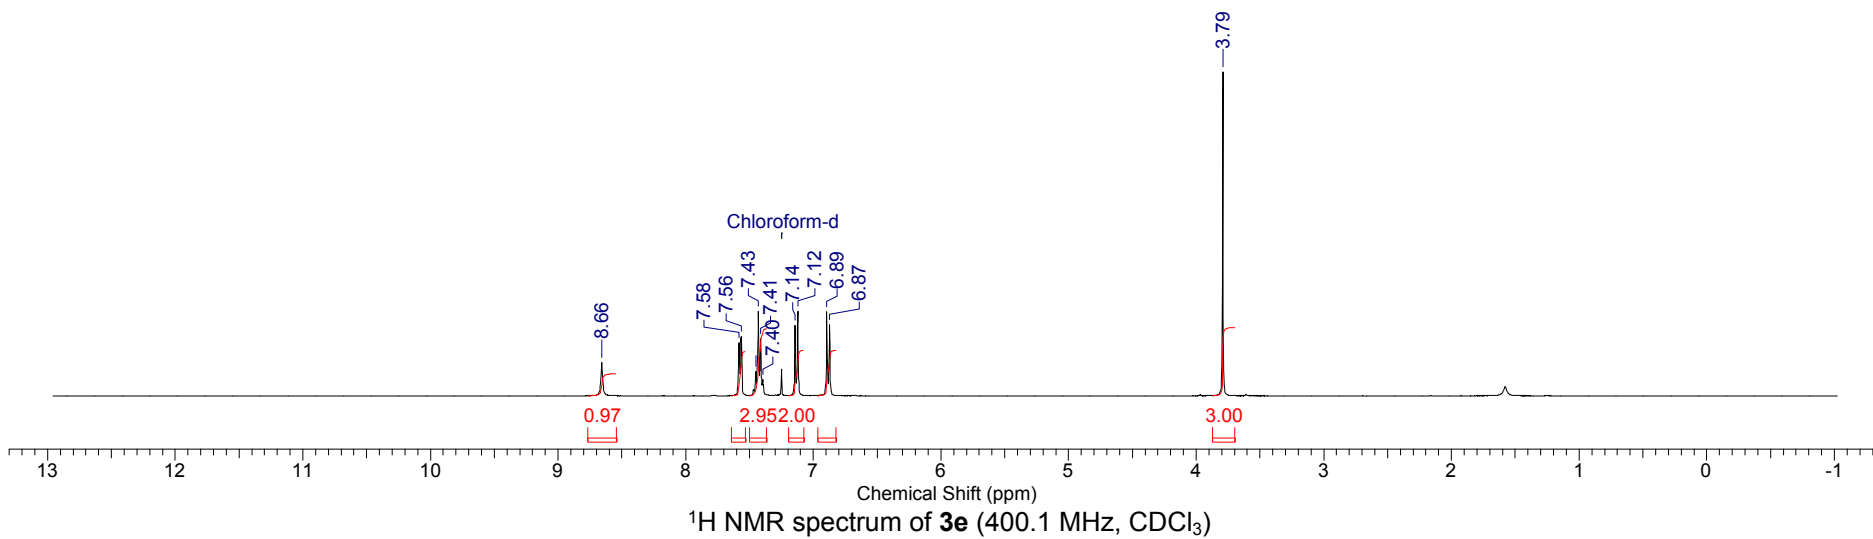

FW 318.2932 Formula C<sub>17</sub>H<sub>13</sub>F<sub>3</sub>N<sub>2</sub>O

|                        |                                                         |                      |                      |                       |                      |
|------------------------|---------------------------------------------------------|----------------------|----------------------|-----------------------|----------------------|
| Acquisition Time (sec) | 0.4999                                                  | Comment              | Imported from UXMNR. | Date                  | 26 Apr 2017 17:24:04 |
| File Name              | C:\BM_DATA\DOCS\SPEC_BM_H,C_I-IV.2017\BM-1042.C_002001r |                      |                      | Frequency (MHz)       | 100.61               |
| Nucleus                | 13C                                                     | Number of Transients | 256                  | Original Points Count | 12076                |
| Pulse Sequence         | zgpg30                                                  | Solvent              | CHLOROFORM-D         | Points Count          | 65536                |
| Temperature (degree C) | 27.000                                                  |                      |                      | Sweep Width (Hz)      | 24154.59             |

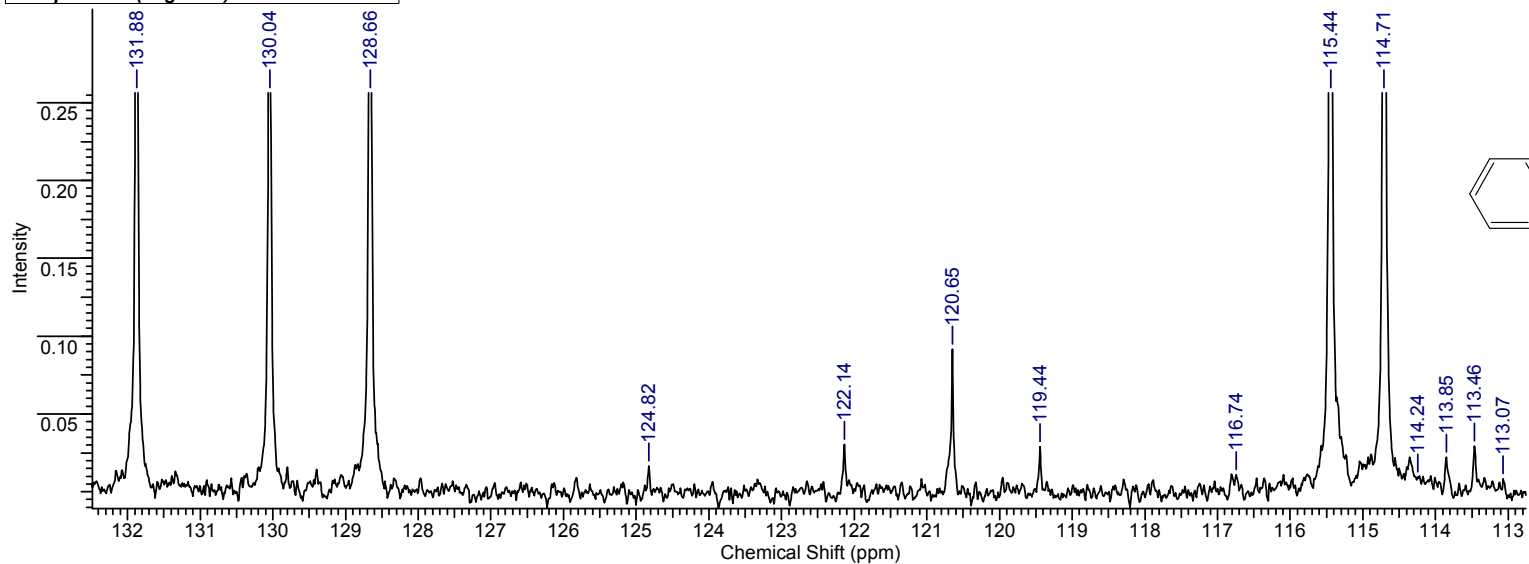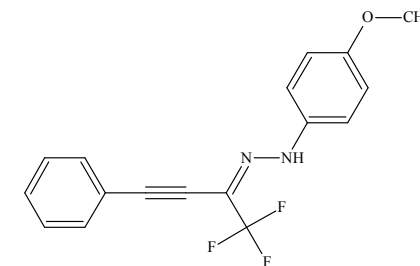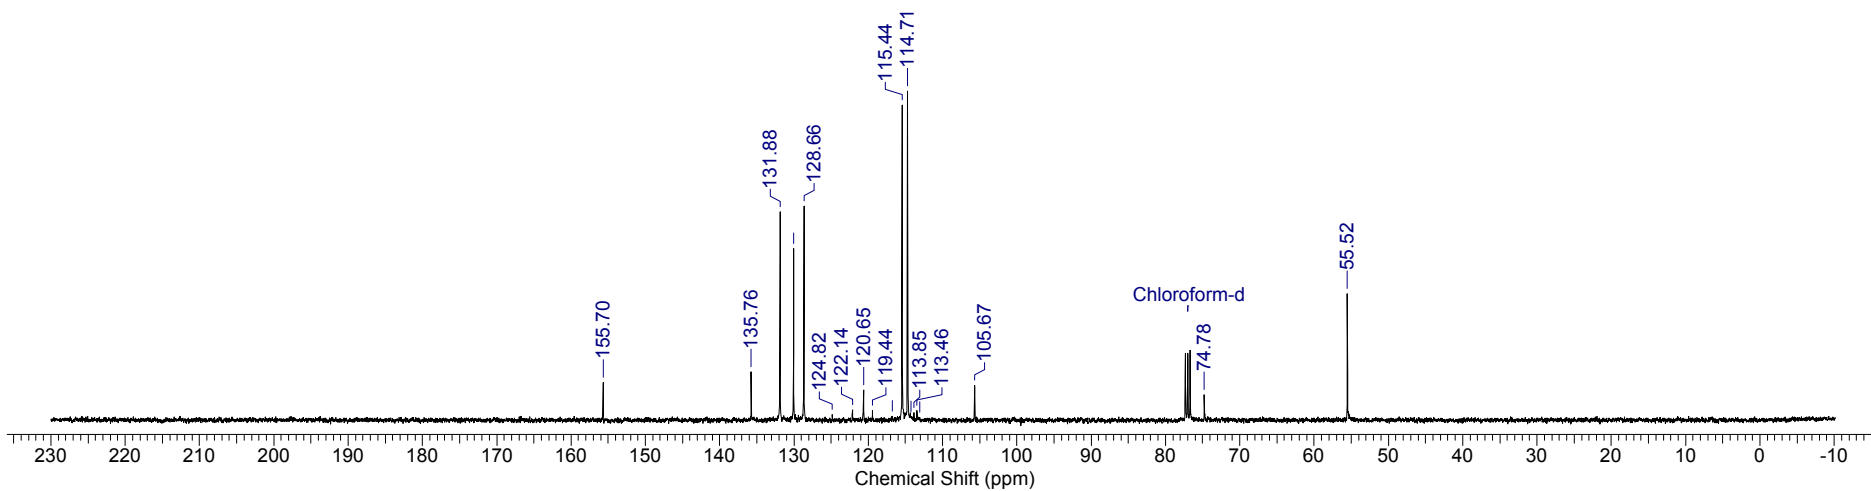

<sup>13</sup>C NMR spectrum of **3e** (100.6 MHz, CDCl<sub>3</sub>)

|           |          |                |                                                                 |
|-----------|----------|----------------|-----------------------------------------------------------------|
| <b>FW</b> | 318.2932 | <b>Formula</b> | C <sub>17</sub> H <sub>13</sub> F <sub>3</sub> N <sub>2</sub> O |
|-----------|----------|----------------|-----------------------------------------------------------------|

|                               |          |                               |             |                             |                                                                   |                              |        |
|-------------------------------|----------|-------------------------------|-------------|-----------------------------|-------------------------------------------------------------------|------------------------------|--------|
| <b>Acquisition Time (sec)</b> | 1.5000   | <b>Date</b>                   | Apr 26 2017 | <b>File Name</b>            | C:\BM_DATA\DOCS\SPEC_F_I-XII.2017\BM-1042_20170426_01\FLUORINE_01 |                              |        |
| <b>Frequency (MHz)</b>        | 376.31   | <b>Nucleus</b>                | 19F         | <b>Number of Transients</b> | 16                                                                | <b>Original Points Count</b> | 133929 |
| <b>Points Count</b>           | 262144   | <b>Pulse Sequence</b>         | s2pul       | <b>Solvent</b>              | CHLOROFORM-D                                                      |                              |        |
| <b>Sweep Width (Hz)</b>       | 89285.71 | <b>Temperature (degree C)</b> | 25.000      |                             |                                                                   |                              |        |

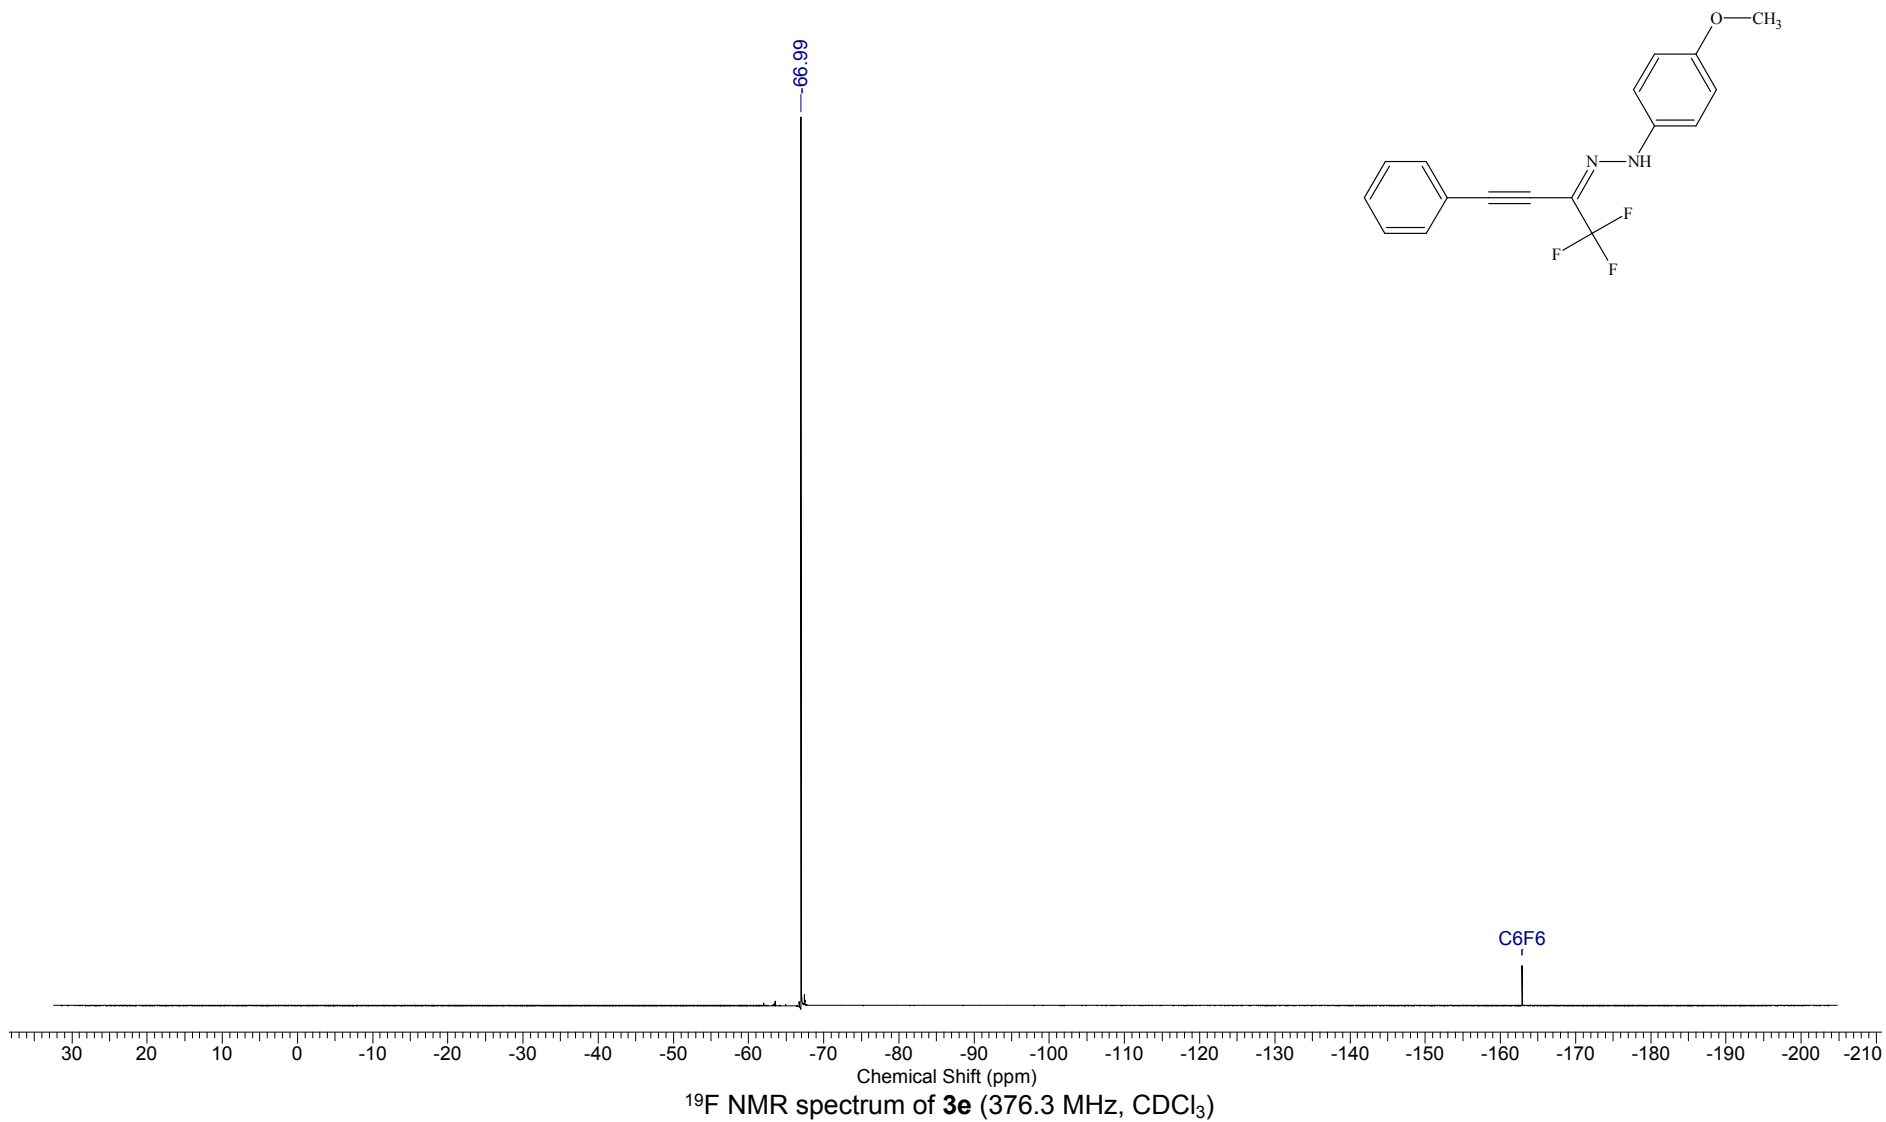

FW 357.1567 Formula C<sub>16</sub>H<sub>9</sub>Cl<sub>2</sub>F<sub>3</sub>N<sub>2</sub>

|                        |                                                         |                      |                      |                       |                      |
|------------------------|---------------------------------------------------------|----------------------|----------------------|-----------------------|----------------------|
| Acquisition Time (sec) | 2.5559                                                  | Comment              | Imported from UXMNR. | Date                  | 29 Apr 2017 13:25:00 |
| File Name              | C:\BM_DATA\DOCS\SPEC_BM_H,C_I-IV.2017\BM-1048.H_001001r |                      |                      | Frequency (MHz)       | 400.13               |
| Nucleus                | 1H                                                      | Number of Transients | 4                    | Original Points Count | 16384                |
| Pulse Sequence         | zg30                                                    | Solvent              | CHLOROFORM-D         | Points Count          | 65536                |
| Temperature (degree C) | 27.000                                                  |                      |                      | Sweep Width (Hz)      | 6410.26              |

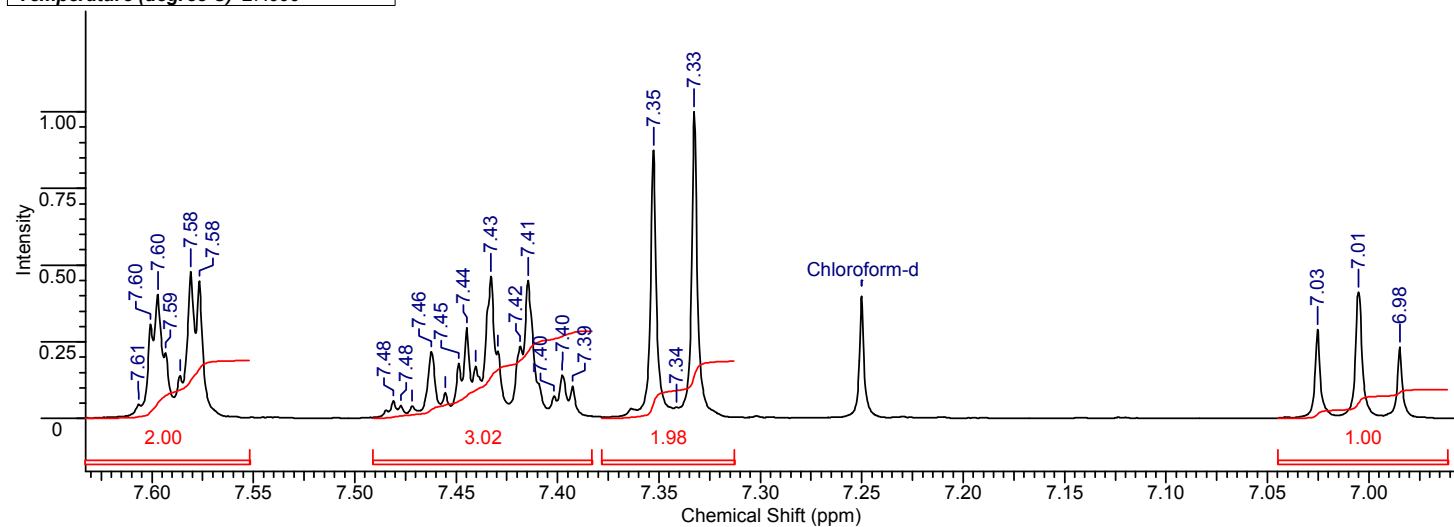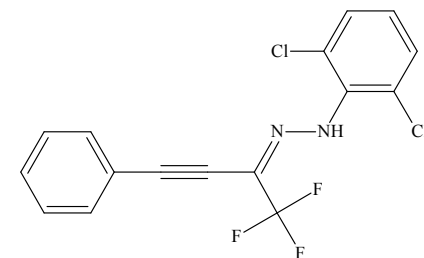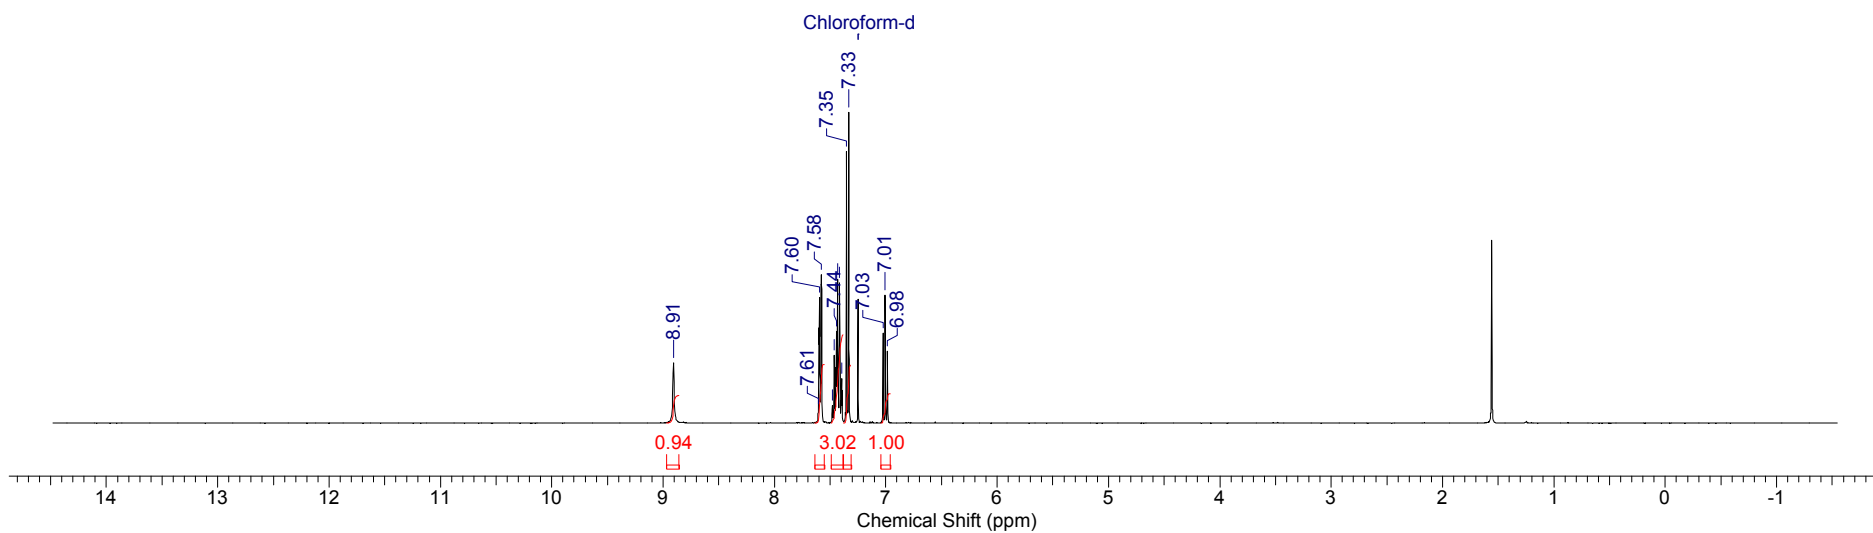

<sup>1</sup>H NMR spectrum of **3f** (400.1 MHz, CDCl<sub>3</sub>)

**FW** 357.1567 **Formula** C<sub>16</sub>H<sub>9</sub>Cl<sub>2</sub>F<sub>3</sub>N<sub>2</sub>

|                               |                                                         |                             |                      |                              |                      |
|-------------------------------|---------------------------------------------------------|-----------------------------|----------------------|------------------------------|----------------------|
| <b>Acquisition Time (sec)</b> | 0.4999                                                  | <b>Comment</b>              | Imported from UXMNR. | <b>Date</b>                  | 29 Apr 2017 13:47:04 |
| <b>File Name</b>              | C:\BM_DATA\DOCS\SPEC_BM_H,C_I-IV.2017\BM-1048.C_002001r |                             |                      | <b>Frequency (MHz)</b>       | 100.61               |
| <b>Nucleus</b>                | <sup>13</sup> C                                         | <b>Number of Transients</b> | 224                  | <b>Original Points Count</b> | 12076                |
| <b>Pulse Sequence</b>         | zgpg30                                                  | <b>Solvent</b>              | CHLOROFORM-D         | <b>Points Count</b>          | 65536                |
| <b>Temperature (degree C)</b> | 27.000                                                  |                             |                      | <b>Sweep Width (Hz)</b>      | 24154.59             |

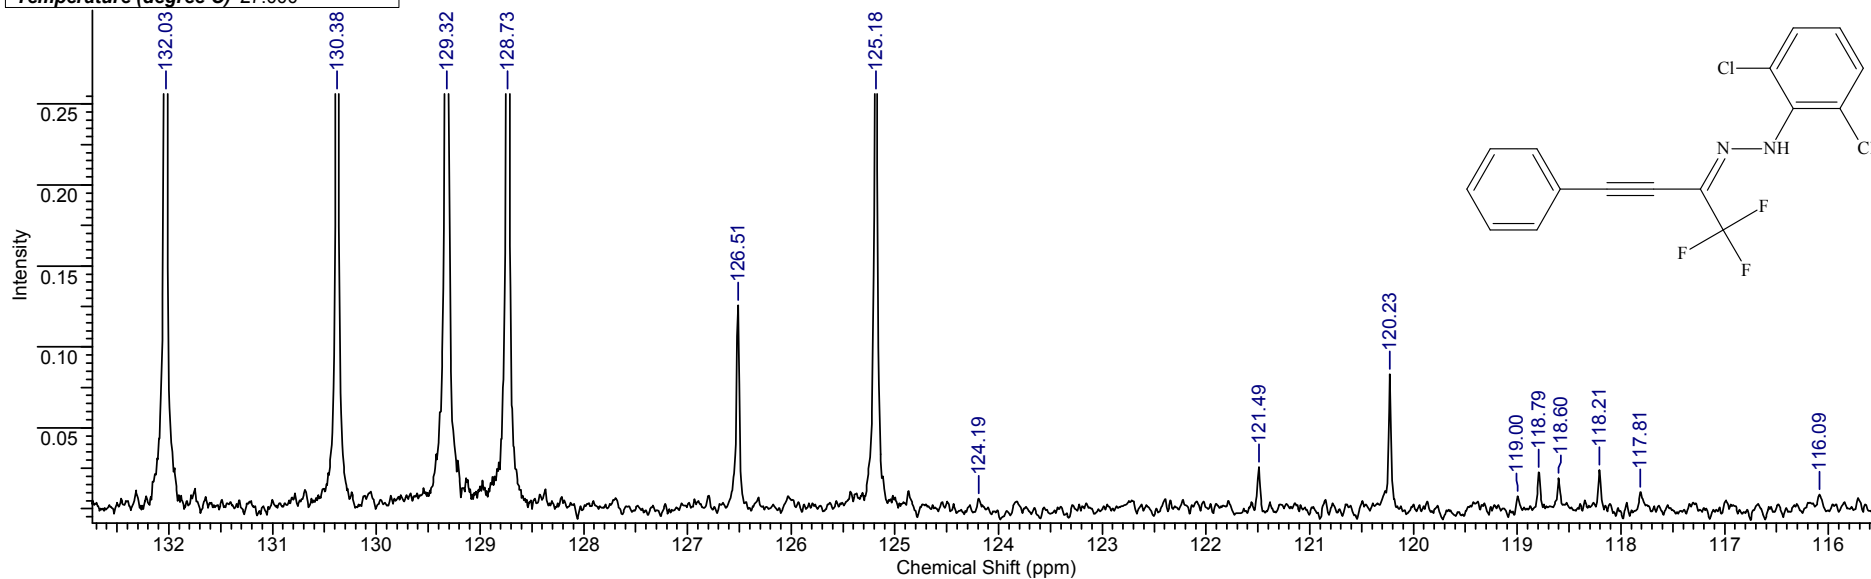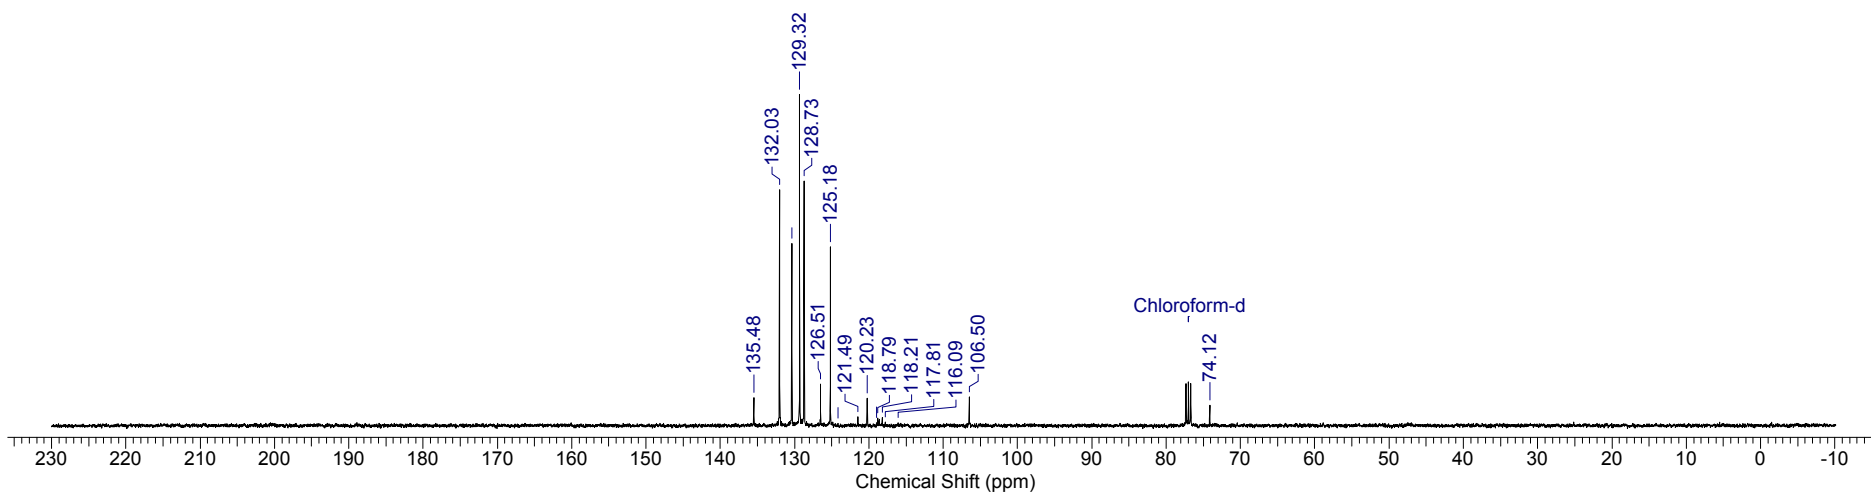

<sup>13</sup>C NMR spectrum of **3f** (100.6 MHz, CDCl<sub>3</sub>)

|           |          |                |                                                                              |
|-----------|----------|----------------|------------------------------------------------------------------------------|
| <b>FW</b> | 357.1567 | <b>Formula</b> | C <sub>16</sub> H <sub>9</sub> Cl <sub>2</sub> F <sub>3</sub> N <sub>2</sub> |
|-----------|----------|----------------|------------------------------------------------------------------------------|

|                               |          |                               |            |                             |                                                                     |                              |        |
|-------------------------------|----------|-------------------------------|------------|-----------------------------|---------------------------------------------------------------------|------------------------------|--------|
| <b>Acquisition Time (sec)</b> | 1.4680   | <b>Date</b>                   | May 4 2017 | <b>File Name</b>            | C:\BM_DATA\DOCS\SPEC_F_I-XII.2017\BM-1048-F_20170504_01\FLUORINE_01 |                              |        |
| <b>Frequency (MHz)</b>        | 376.32   | <b>Nucleus</b>                | 19F        | <b>Number of Transients</b> | 8                                                                   | <b>Original Points Count</b> | 131073 |
| <b>Points Count</b>           | 262144   | <b>Pulse Sequence</b>         | s2pul      | <b>Solvent</b>              | CHLOROFORM-D                                                        |                              |        |
| <b>Sweep Width (Hz)</b>       | 89285.71 | <b>Temperature (degree C)</b> | 22.000     |                             |                                                                     |                              |        |

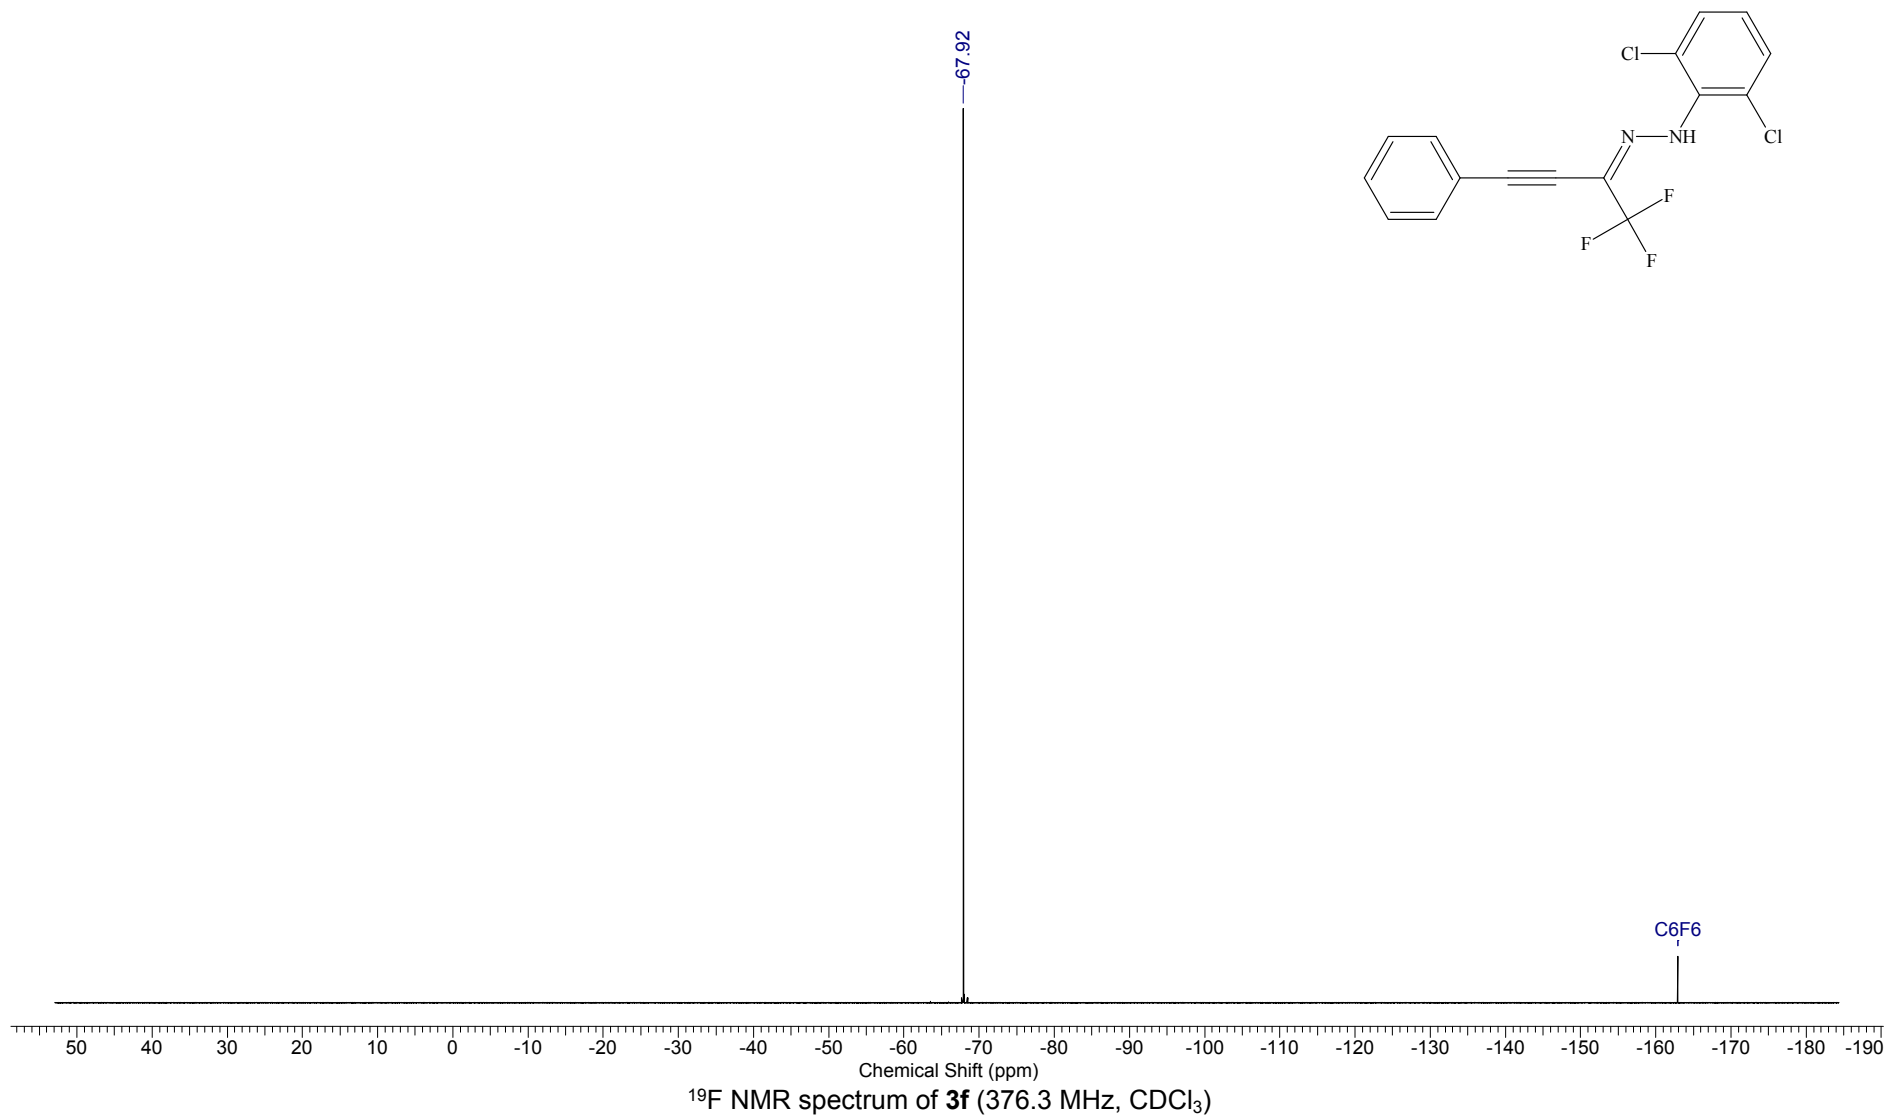

FW 313.2767 Formula C<sub>17</sub>H<sub>10</sub>F<sub>3</sub>N<sub>3</sub>

|                        |                                                          |                      |                      |                       |                      |
|------------------------|----------------------------------------------------------|----------------------|----------------------|-----------------------|----------------------|
| Acquisition Time (sec) | 2.5559                                                   | Comment              | Imported from UXMNR. | Date                  | 02 May 2017 14:13:24 |
| File Name              | C:\BM_DATA\DOCS\SPEC_BM_H,C_V-XII.2017\BM-1056.H_001001r |                      |                      | Frequency (MHz)       | 400.13               |
| Nucleus                | 1H                                                       | Number of Transients | 4                    | Original Points Count | 16384                |
| Pulse Sequence         | zg30                                                     | Solvent              | CHLOROFORM-D         | Points Count          | 65536                |
| Temperature (degree C) | 27.000                                                   |                      |                      | Sweep Width (Hz)      | 6410.26              |

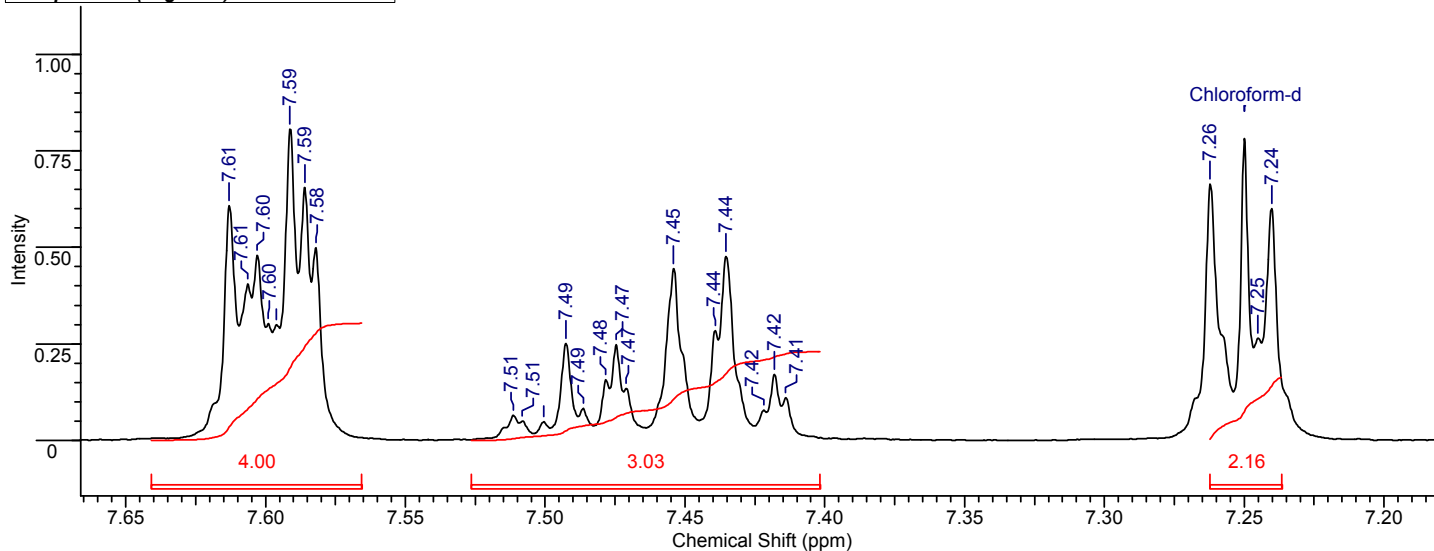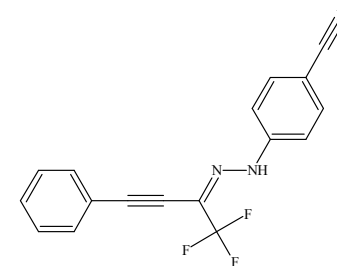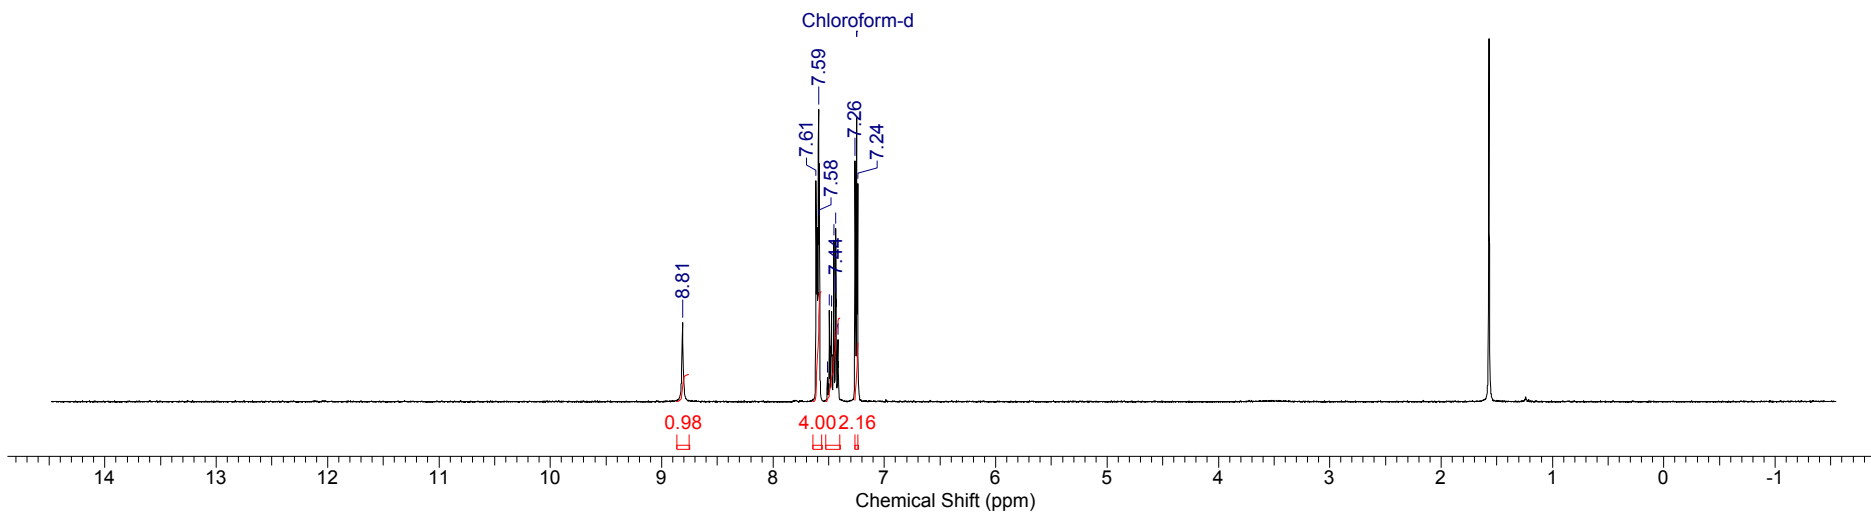

<sup>1</sup>H NMR spectrum of **3g** (400.1 MHz, CDCl<sub>3</sub>)

|           |          |                |                                                               |
|-----------|----------|----------------|---------------------------------------------------------------|
| <b>FW</b> | 313.2767 | <b>Formula</b> | C <sub>17</sub> H <sub>10</sub> F <sub>3</sub> N <sub>3</sub> |
|-----------|----------|----------------|---------------------------------------------------------------|

|                               |                                                          |                             |                      |                              |                         |                      |       |
|-------------------------------|----------------------------------------------------------|-----------------------------|----------------------|------------------------------|-------------------------|----------------------|-------|
| <b>Acquisition Time (sec)</b> | 0.4999                                                   | <b>Comment</b>              | Imported from UXMNR. |                              | <b>Date</b>             | 02 May 2017 15:04:44 |       |
| <b>File Name</b>              | C:\BM_DATA\DOCS\SPEC_BM_H,C_V-XII.2017\BM-1056.C_002001r |                             |                      | <b>Frequency (MHz)</b>       | 100.61                  |                      |       |
| <b>Nucleus</b>                | 13C                                                      | <b>Number of Transients</b> | 256                  | <b>Original Points Count</b> | 12076                   | <b>Points Count</b>  | 65536 |
| <b>Pulse Sequence</b>         | zpgpg30                                                  | <b>Solvent</b>              | CHLOROFORM-D         |                              | <b>Sweep Width (Hz)</b> | 24154.59             |       |
| <b>Temperature (degree C)</b> | 27.000                                                   |                             |                      |                              |                         |                      |       |

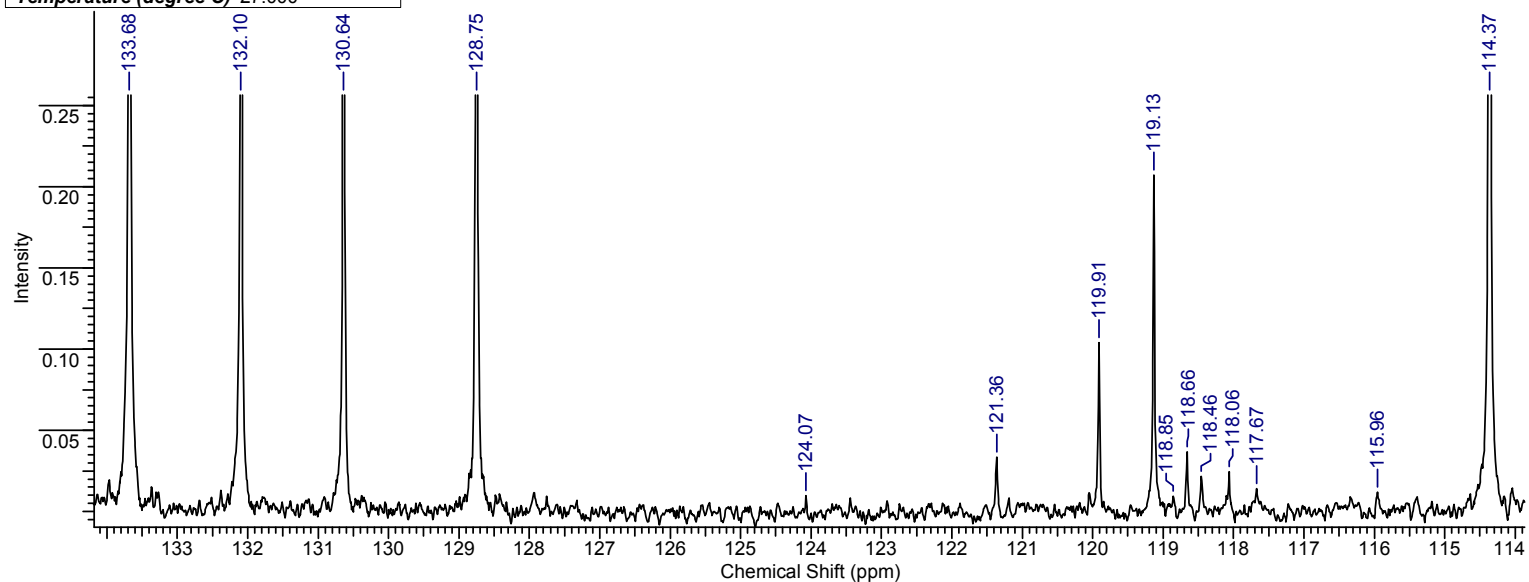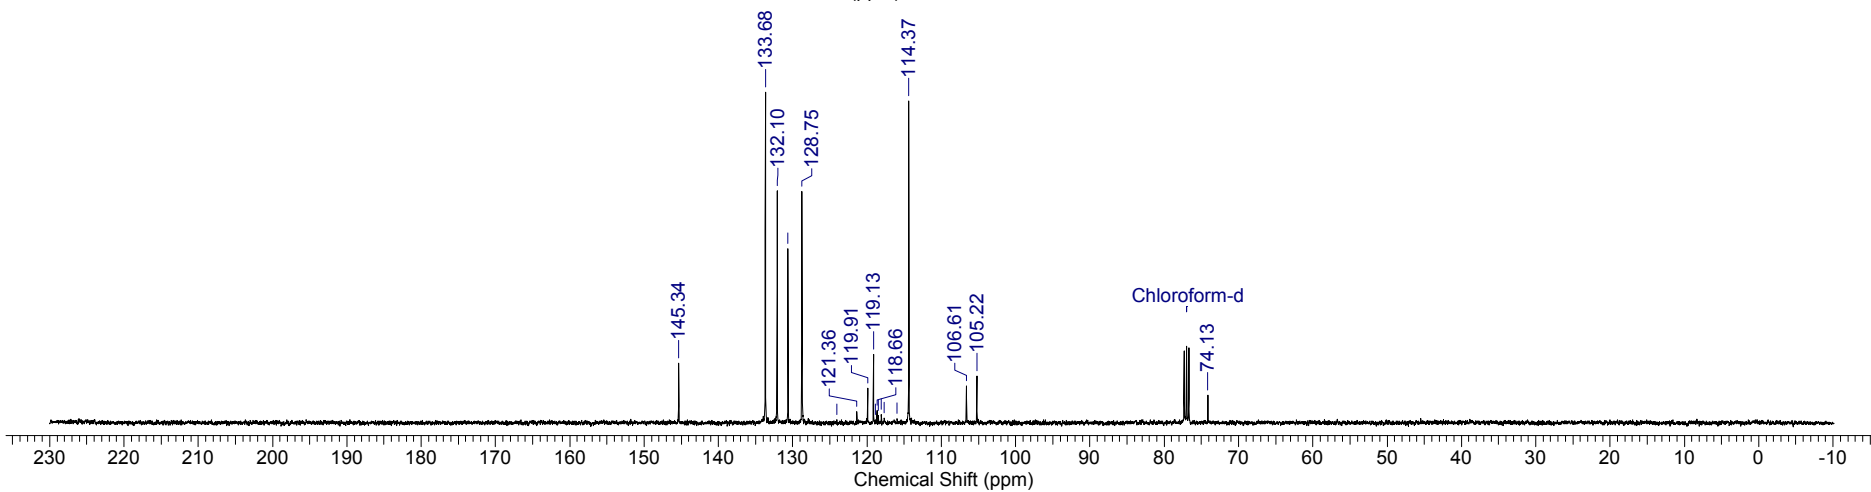

<sup>13</sup>C NMR spectrum of **3g** (100.6 MHz, CDCl<sub>3</sub>)



|           |          |                |                                                               |
|-----------|----------|----------------|---------------------------------------------------------------|
| <b>FW</b> | 313.2767 | <b>Formula</b> | C <sub>17</sub> H <sub>10</sub> F <sub>3</sub> N <sub>3</sub> |
|-----------|----------|----------------|---------------------------------------------------------------|

|                               |          |                               |                 |                             |                                                                   |                              |        |
|-------------------------------|----------|-------------------------------|-----------------|-----------------------------|-------------------------------------------------------------------|------------------------------|--------|
| <b>Acquisition Time (sec)</b> | 1.4680   | <b>Date</b>                   | May 4 2017      | <b>File Name</b>            | C:\BM_DATA\DOCS\SPEC_F_I-XII.2017\BM-1056_20170504_01\FLUORINE_01 |                              |        |
| <b>Frequency (MHz)</b>        | 376.32   | <b>Nucleus</b>                | <sup>19</sup> F | <b>Number of Transients</b> | 8                                                                 | <b>Original Points Count</b> | 131073 |
| <b>Points Count</b>           | 262144   | <b>Pulse Sequence</b>         | s2pul           | <b>Solvent</b>              | CHLOROFORM-D                                                      |                              |        |
| <b>Sweep Width (Hz)</b>       | 89285.71 | <b>Temperature (degree C)</b> | 22.000          |                             |                                                                   |                              |        |

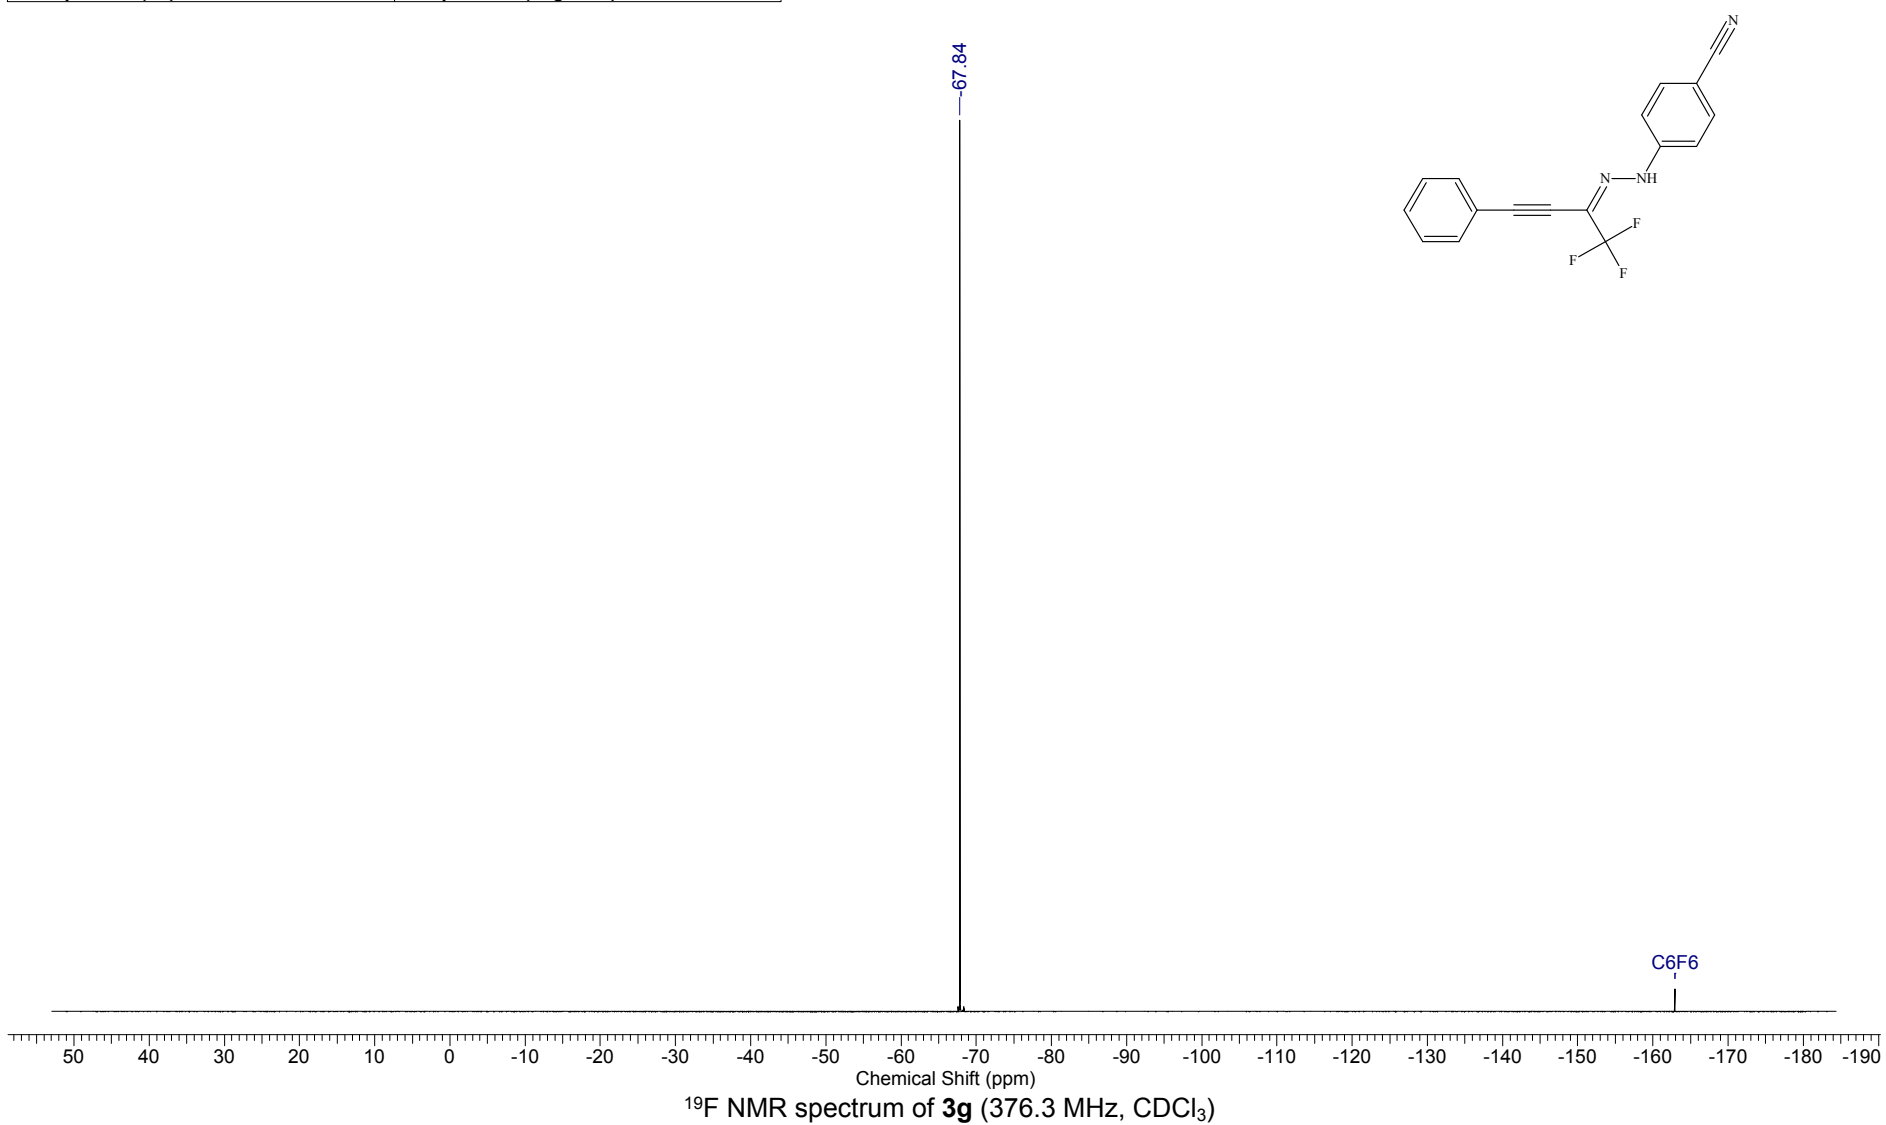

FW 378.2624 Formula C<sub>16</sub>H<sub>9</sub>F<sub>3</sub>N<sub>4</sub>O<sub>4</sub>

| Acquisition Time (sec) | 2.5559                                             | Comment                | Imported from UXNMR. |                | Date  | 06 Sep 2016 14:35:04 |
|------------------------|----------------------------------------------------|------------------------|----------------------|----------------|-------|----------------------|
| File Name              | D:\BN\output\2016\09\řáf öýádü\BM-838-11.H_001001r | Frequency (MHz)        | 400.13               | Nucleus        | 1H    |                      |
| Number of Transients   | 4                                                  | Original Points Count  | 16384                | Points Count   | 65536 |                      |
| Solvent                | CHLOROFORM-D                                       | Sweep Width (Hz)       | 6410.26              | Pulse Sequence | zg30  |                      |
|                        |                                                    | Temperature (degree C) | 27.000               |                |       |                      |

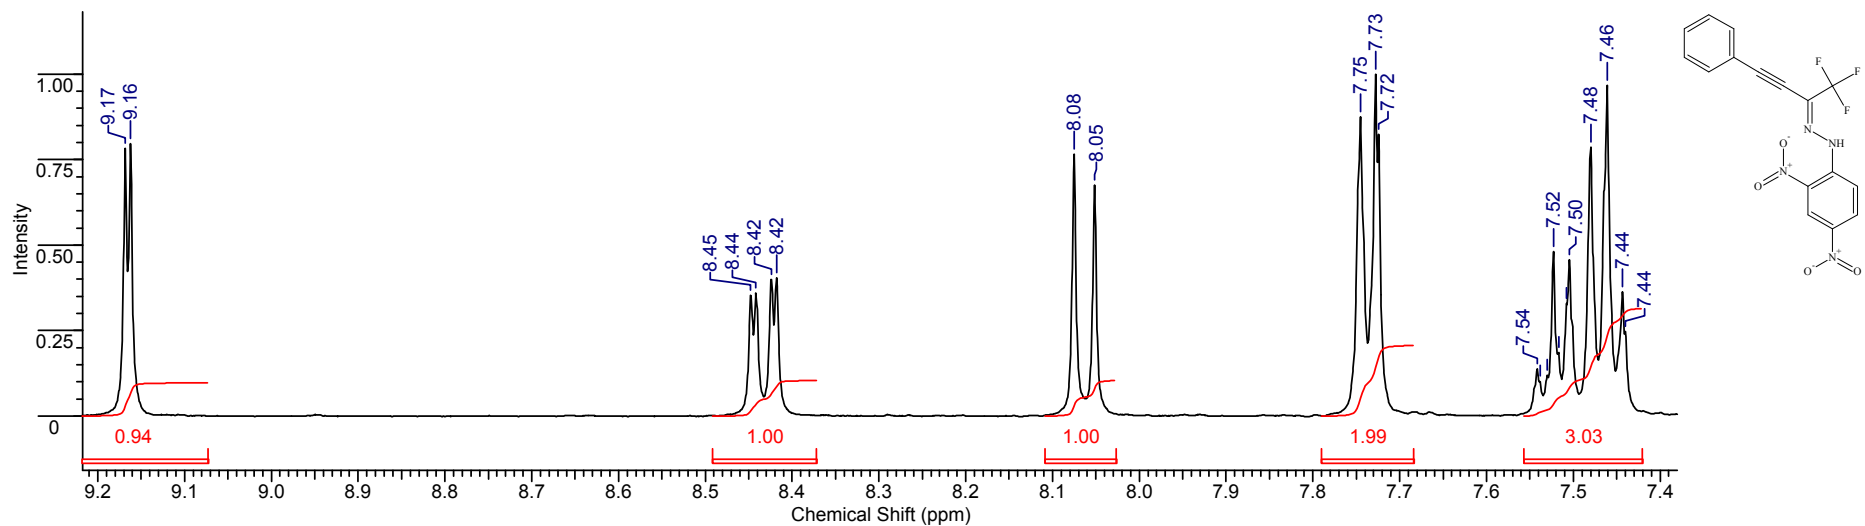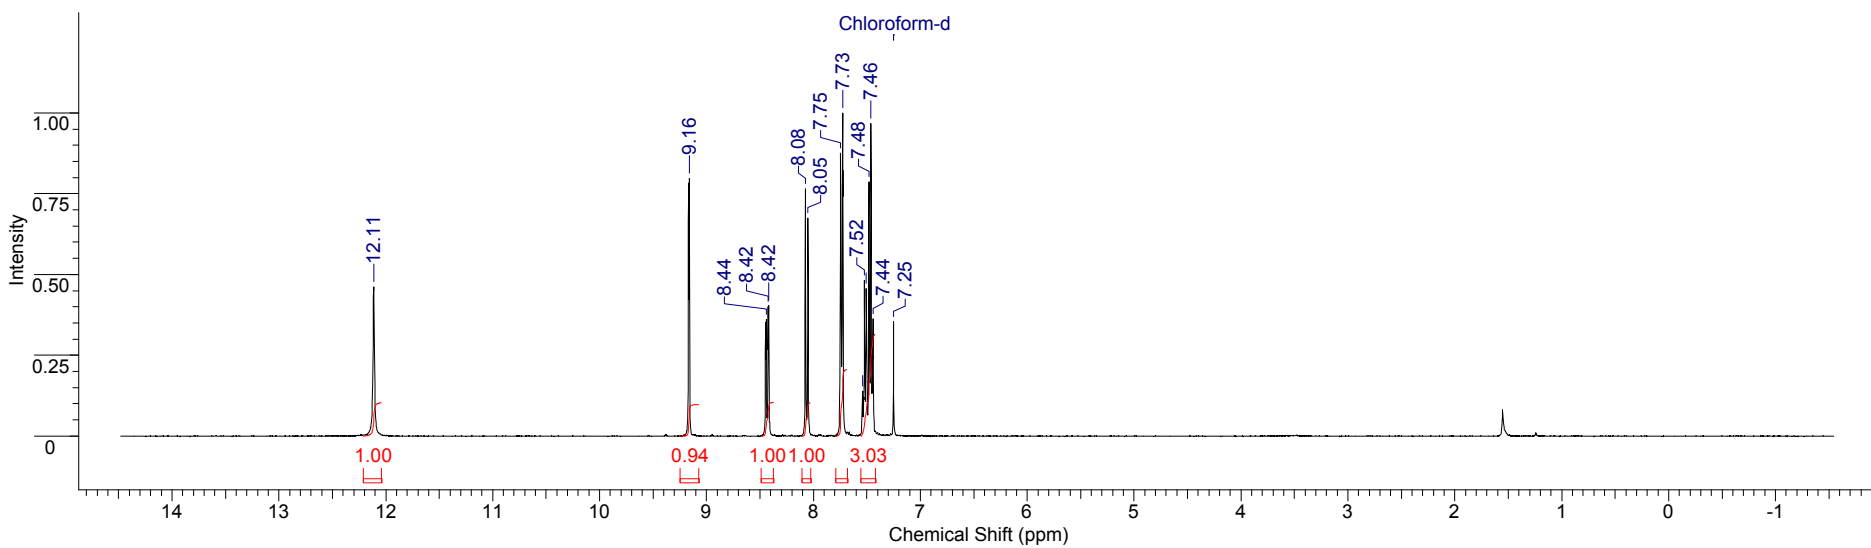

<sup>1</sup>H NMR spectrum of **3h** (400.1 MHz, CDCl<sub>3</sub>)

FW 378.2624 Formula  $C_{16}H_9F_3N_4O_4$

|                        |          |                        |             |                      |                                                                    |                             |
|------------------------|----------|------------------------|-------------|----------------------|--------------------------------------------------------------------|-----------------------------|
| Acquisition Time (sec) | 0.7340   | Date                   | Mar 23 2015 | File Name            | D:\BN\Docs (BN)\vasiliy\SPEC_BM_FBM733-2-F_20150323_01\FLUORINE_01 |                             |
| Frequency (MHz)        | 376.31   | Nucleus                | $^{19}F$    | Number of Transients | 1000                                                               | Original Points Count 65536 |
| Points Count           | 65536    | Pulse Sequence         | s2pul       | Solvent              | CHLOROFORM-D                                                       |                             |
| Sweep Width (Hz)       | 89285.71 | Temperature (degree C) | 26.000      |                      |                                                                    |                             |

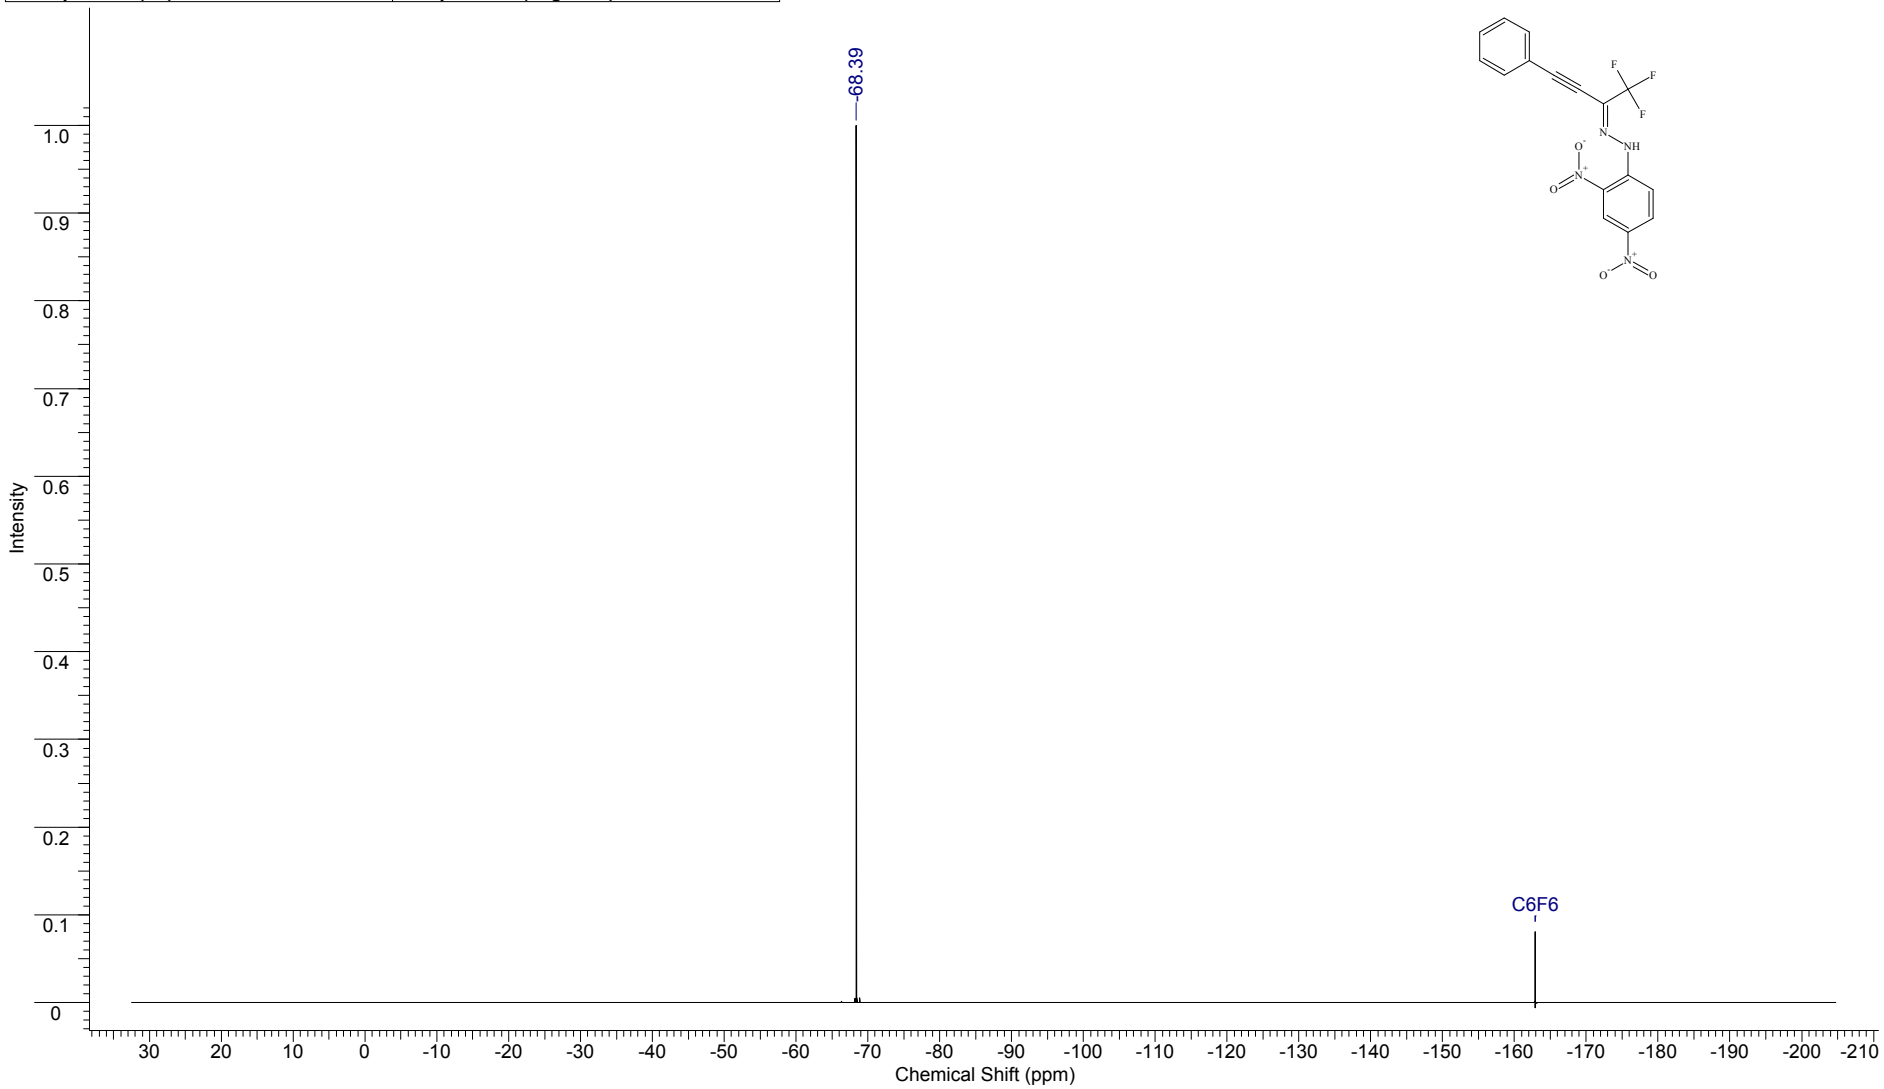

FW 588.5452 Formula C<sub>33</sub>H<sub>22</sub>F<sub>6</sub>N<sub>4</sub>

|                        |                                                            |                      |                      |                       |                 |                        |        |
|------------------------|------------------------------------------------------------|----------------------|----------------------|-----------------------|-----------------|------------------------|--------|
| Acquisition Time (sec) | 2.5559                                                     | Comment              | Imported from UXNMR. |                       | Date            | 02 May 2017 14:38:50   |        |
| File Name              | C:\BM_DATA\DOCS\SPEC_BM_H,C_V-XII.2017\BM-1053-a.H_001001r |                      |                      |                       | Frequency (MHz) | 400.13                 |        |
| Nucleus                | 1H                                                         | Number of Transients | 4                    | Original Points Count | 16384           | Points Count           | 65536  |
| Pulse Sequence         | zg30                                                       | Solvent              | DMSO-D6              | Sweep Width (Hz)      | 6410.26         | Temperature (degree C) | 27.000 |

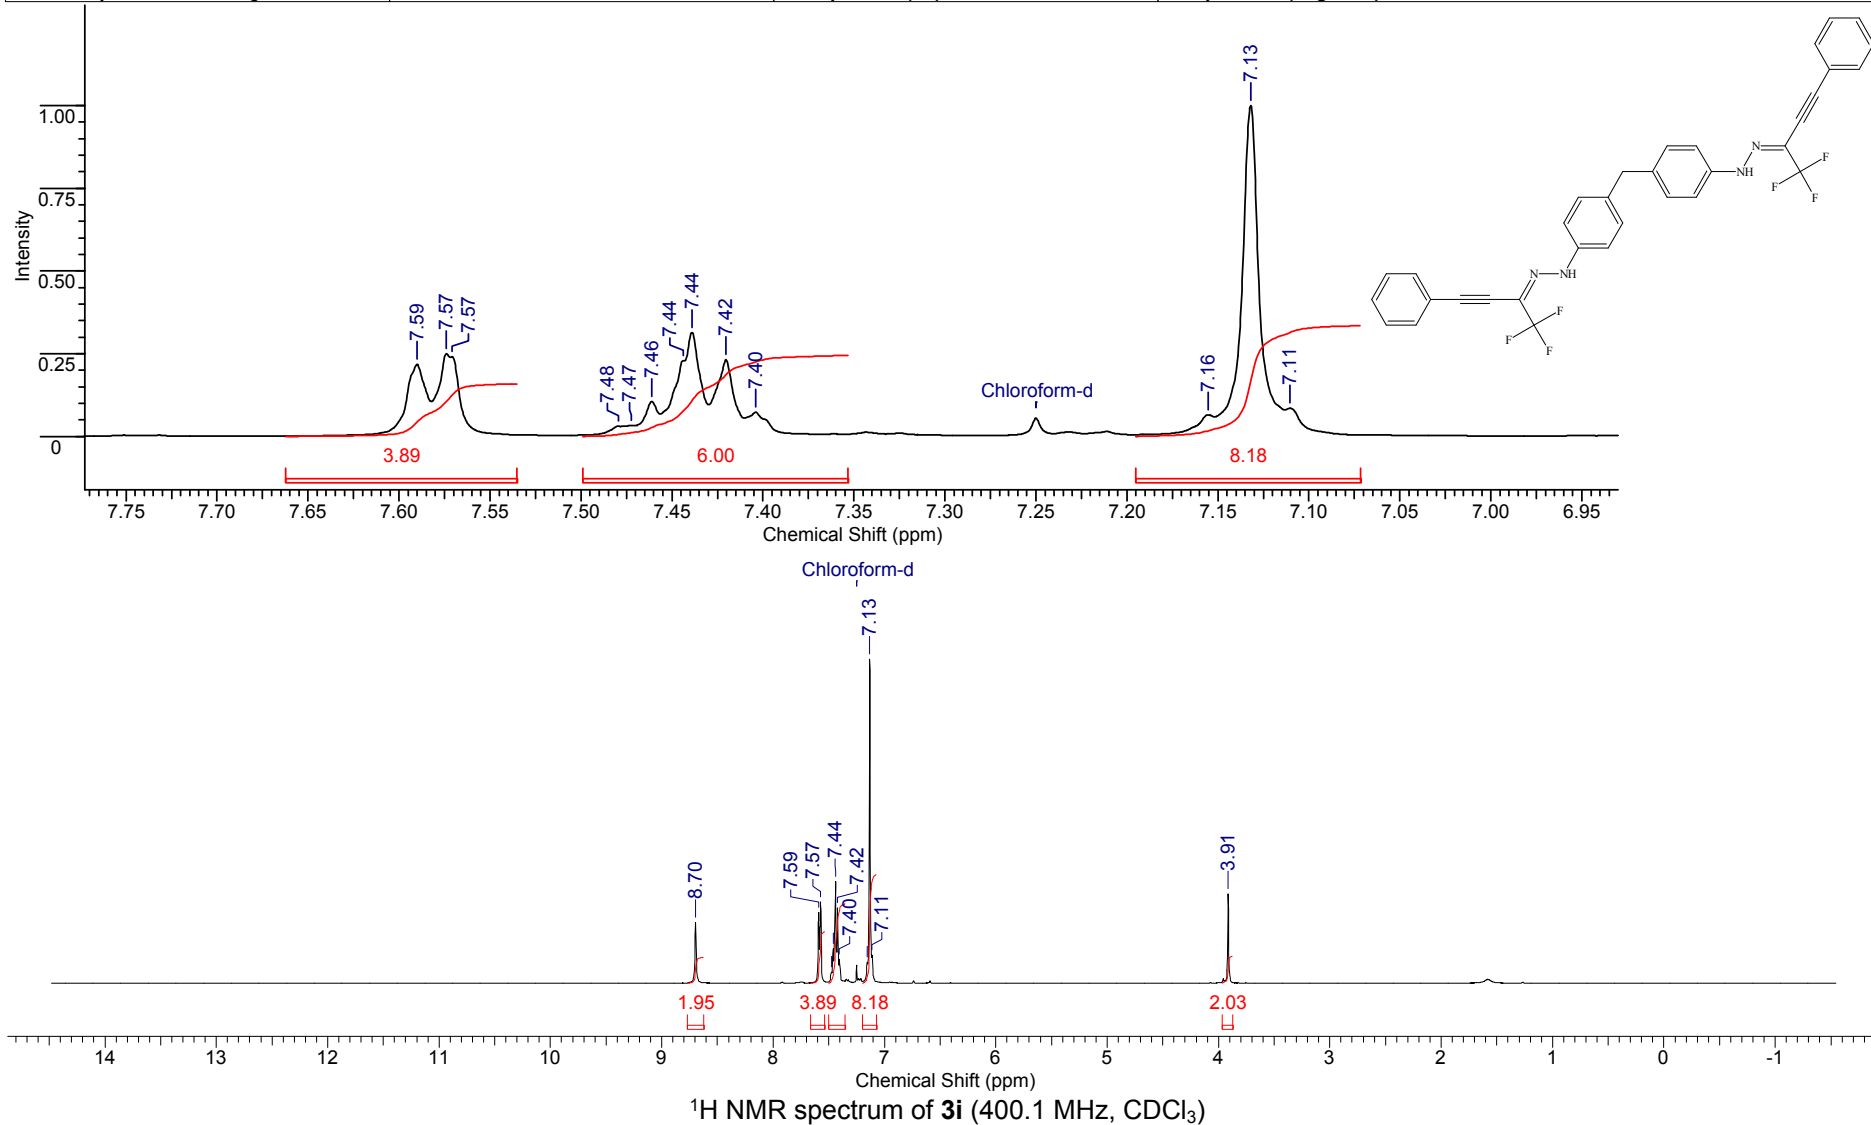

FW 588.5452 Formula C<sub>33</sub>H<sub>22</sub>F<sub>6</sub>N<sub>4</sub>

|                        |                                                            |                      |                      |                       |                      |
|------------------------|------------------------------------------------------------|----------------------|----------------------|-----------------------|----------------------|
| Acquisition Time (sec) | 0.4999                                                     | Comment              | Imported from UXNMR. | Date                  | 02 May 2017 14:48:12 |
| File Name              | C:\BM_DATA\DOCS\SPEC_BM_H,C_V-XII.2017\BM-1053-a.C_002001r |                      |                      | Frequency (MHz)       | 100.61               |
| Nucleus                | 13C                                                        | Number of Transients | 316                  | Original Points Count | 12076                |
| Pulse Sequence         | zgpg30                                                     | Solvent              | CHLOROFORM-D         | Points Count          | 65536                |
| Temperature (degree C) | 27.000                                                     |                      |                      | Sweep Width (Hz)      | 24154.59             |

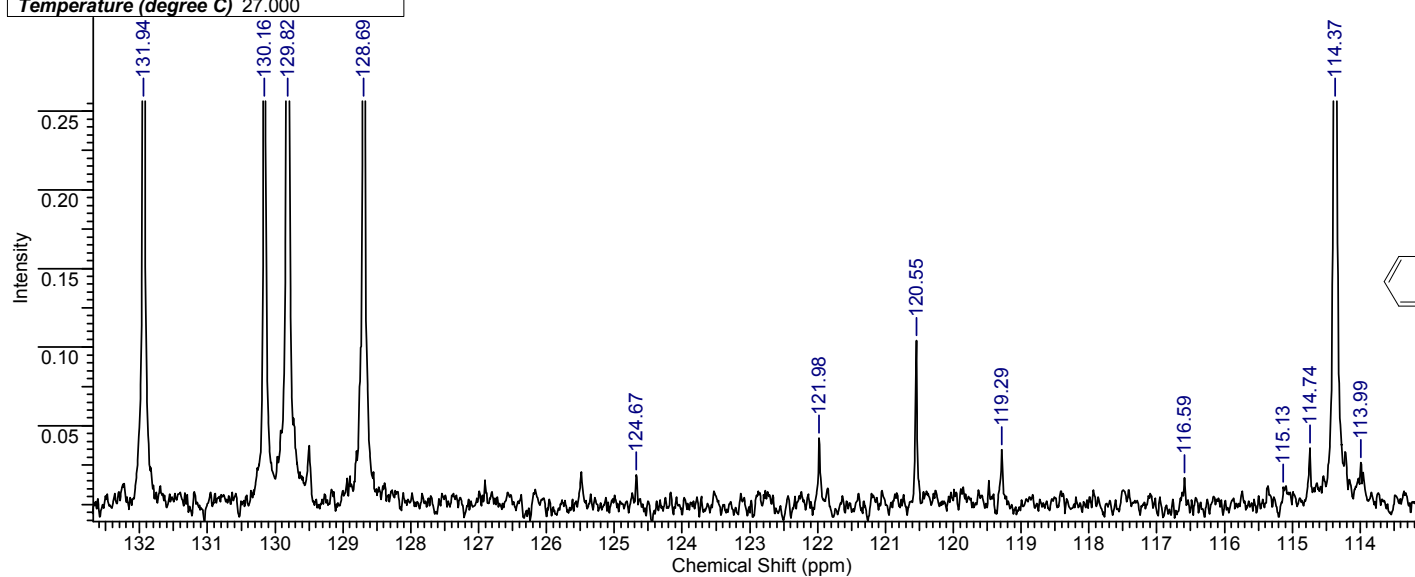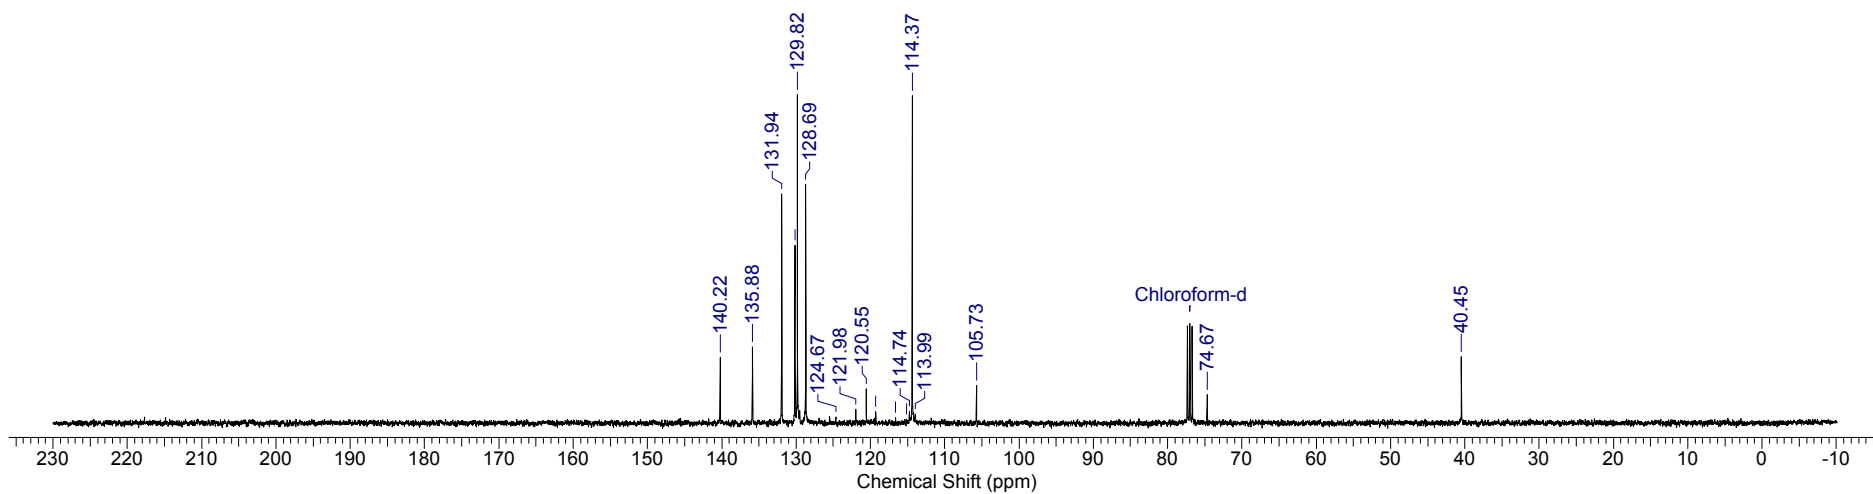

<sup>13</sup>C NMR spectrum of **3i** (100.6 MHz, CDCl<sub>3</sub>)

|           |          |                |                                                               |
|-----------|----------|----------------|---------------------------------------------------------------|
| <b>FW</b> | 588.5452 | <b>Formula</b> | C <sub>33</sub> H <sub>22</sub> F <sub>6</sub> N <sub>4</sub> |
|-----------|----------|----------------|---------------------------------------------------------------|

|                               |          |                               |                 |                             |                                                                      |                              |        |
|-------------------------------|----------|-------------------------------|-----------------|-----------------------------|----------------------------------------------------------------------|------------------------------|--------|
| <b>Acquisition Time (sec)</b> | 1.4680   | <b>Date</b>                   | May 4 2017      | <b>File Name</b>            | C:\BM_DATA\DOCS\SPEC_F_I-XII.2017\BM-1053a-F_20170504_01\FLUORINE_01 |                              |        |
| <b>Frequency (MHz)</b>        | 376.32   | <b>Nucleus</b>                | <sup>19</sup> F | <b>Number of Transients</b> | 8                                                                    | <b>Original Points Count</b> | 131073 |
| <b>Points Count</b>           | 262144   | <b>Pulse Sequence</b>         | s2pul           | <b>Solvent</b>              | CHLOROFORM-D                                                         |                              |        |
| <b>Sweep Width (Hz)</b>       | 89285.71 | <b>Temperature (degree C)</b> | 22.000          |                             |                                                                      |                              |        |

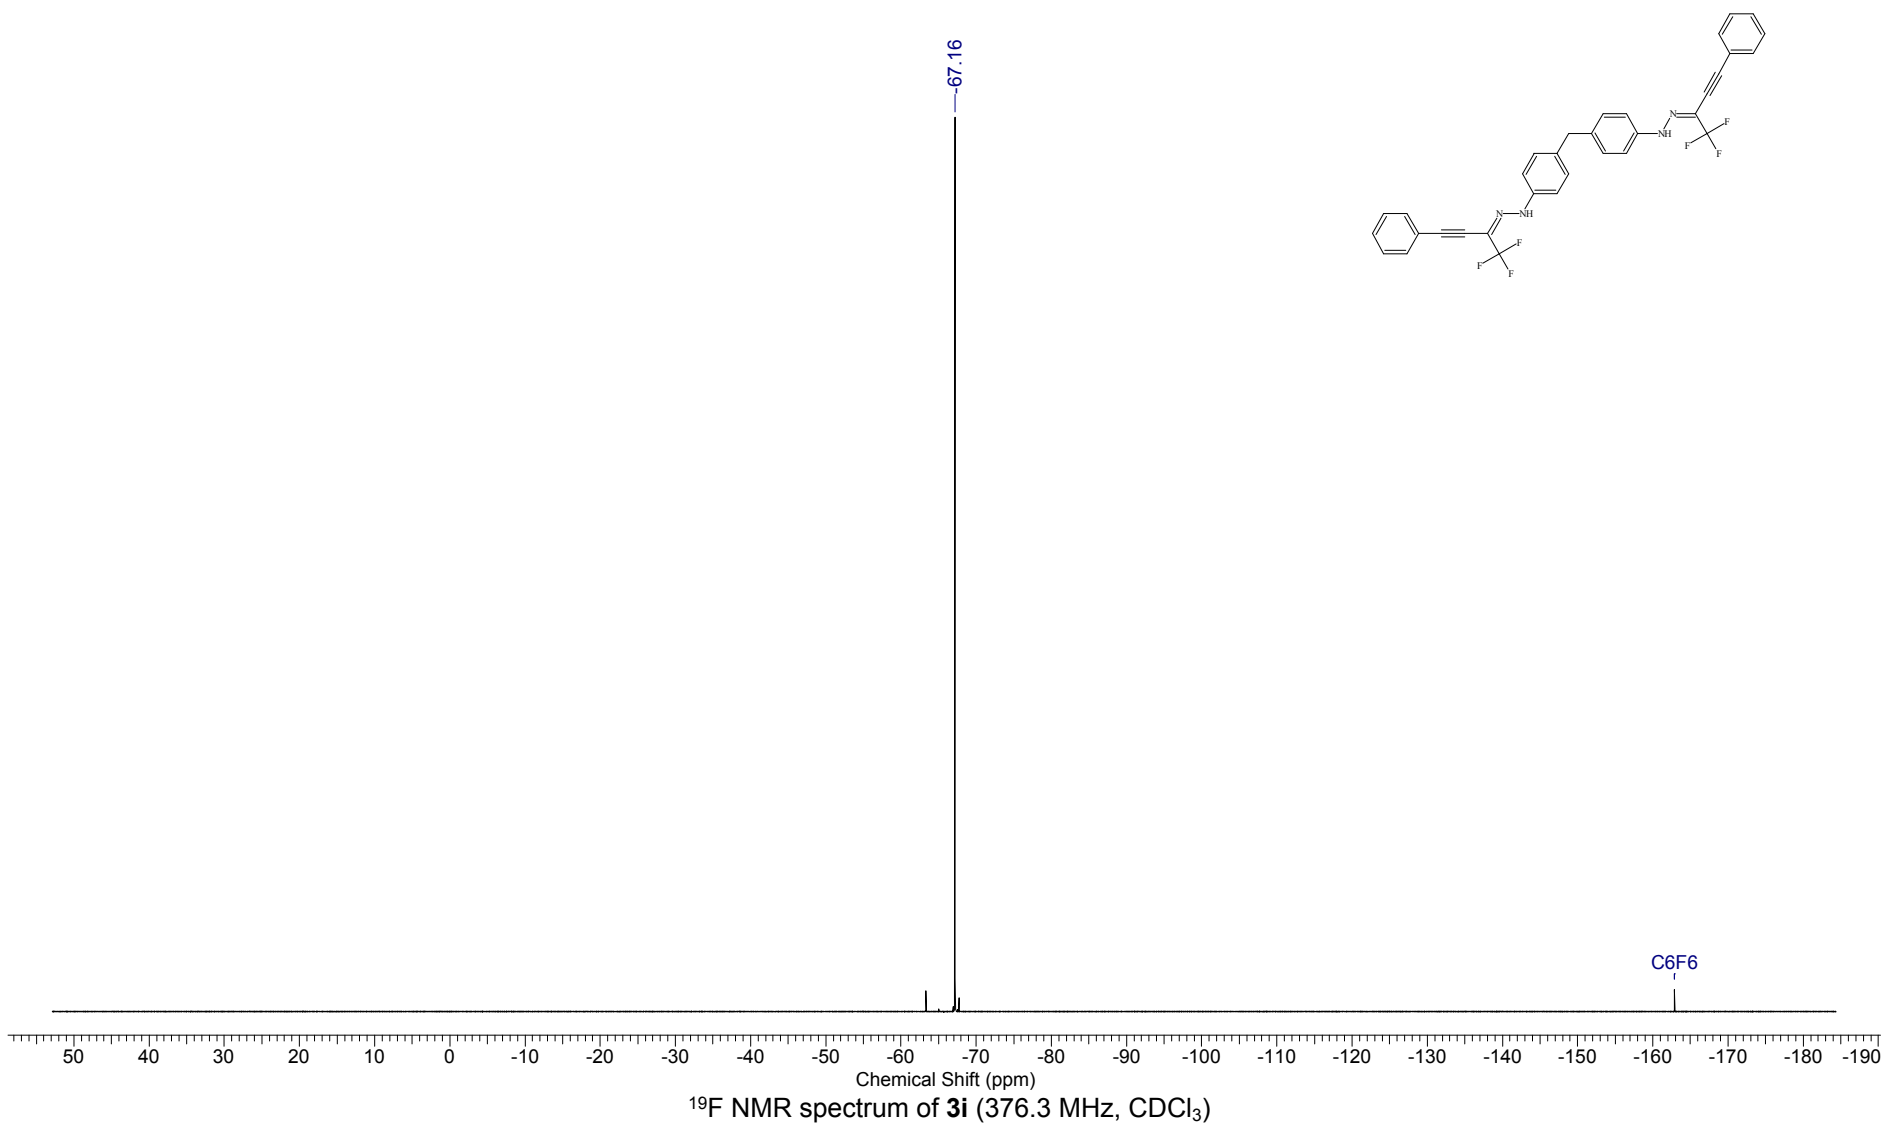

FW 366.3586      Formula C<sub>17</sub>H<sub>13</sub>F<sub>3</sub>N<sub>2</sub>O<sub>2</sub>S

| Acquisition Time (sec) | 2.9295                            | Comment                | Imported from UXNMR. |                | Date | 25 Apr 2017 22:30:40 |              |
|------------------------|-----------------------------------|------------------------|----------------------|----------------|------|----------------------|--------------|
| File Name              | C:\BM_DATA\170425\BM-1045_001001r | Frequency (MHz)        | 400.13               | Nucleus        | 1H   | Number of Transients | 8            |
| Original Points Count  | 16384                             | Points Count           | 65536                | Pulse Sequence | zg30 | Solvent              | CHLOROFORM-D |
| Sweep Width (Hz)       | 5592.84                           | Temperature (degree C) | 27.000               |                |      |                      |              |

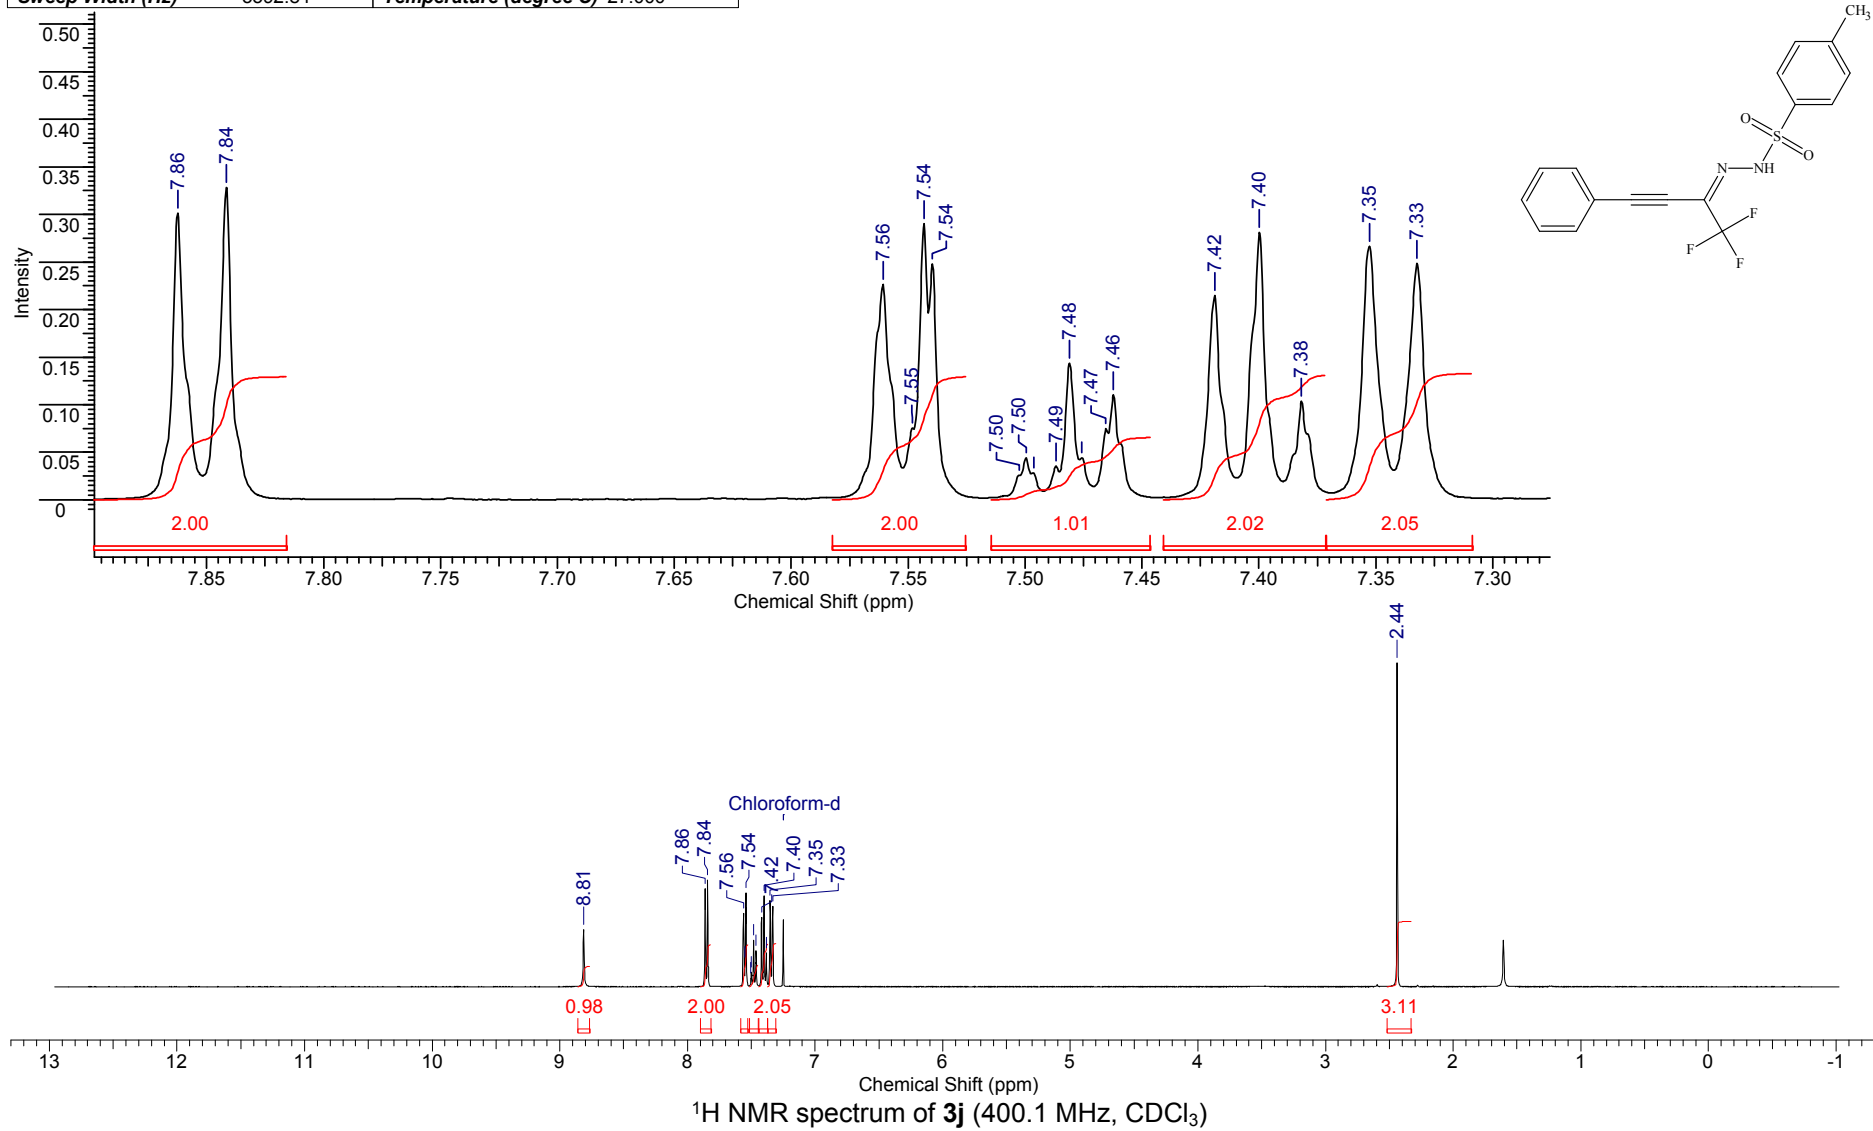

FW 366.3586      Formula C<sub>17</sub>H<sub>13</sub>F<sub>3</sub>N<sub>2</sub>O<sub>2</sub>S

|                        |                                                         |                      |                      |                       |                      |
|------------------------|---------------------------------------------------------|----------------------|----------------------|-----------------------|----------------------|
| Acquisition Time (sec) | 0.4999                                                  | Comment              | Imported from UXMNR. | Date                  | 26 Apr 2017 17:28:46 |
| File Name              | C:\BM_DATA\DOCS\SPEC_BM_H,C_I-IV.2017\BM-1045.C_002001r |                      |                      | Frequency (MHz)       | 100.61               |
| Nucleus                | 13C                                                     | Number of Transients | 128                  | Original Points Count | 12076                |
| Pulse Sequence         | zpgg30                                                  | Solvent              | CHLOROFORM-D         | Points Count          | 65536                |
| Temperature (degree C) | 27.000                                                  |                      |                      | Sweep Width (Hz)      | 24154.59             |

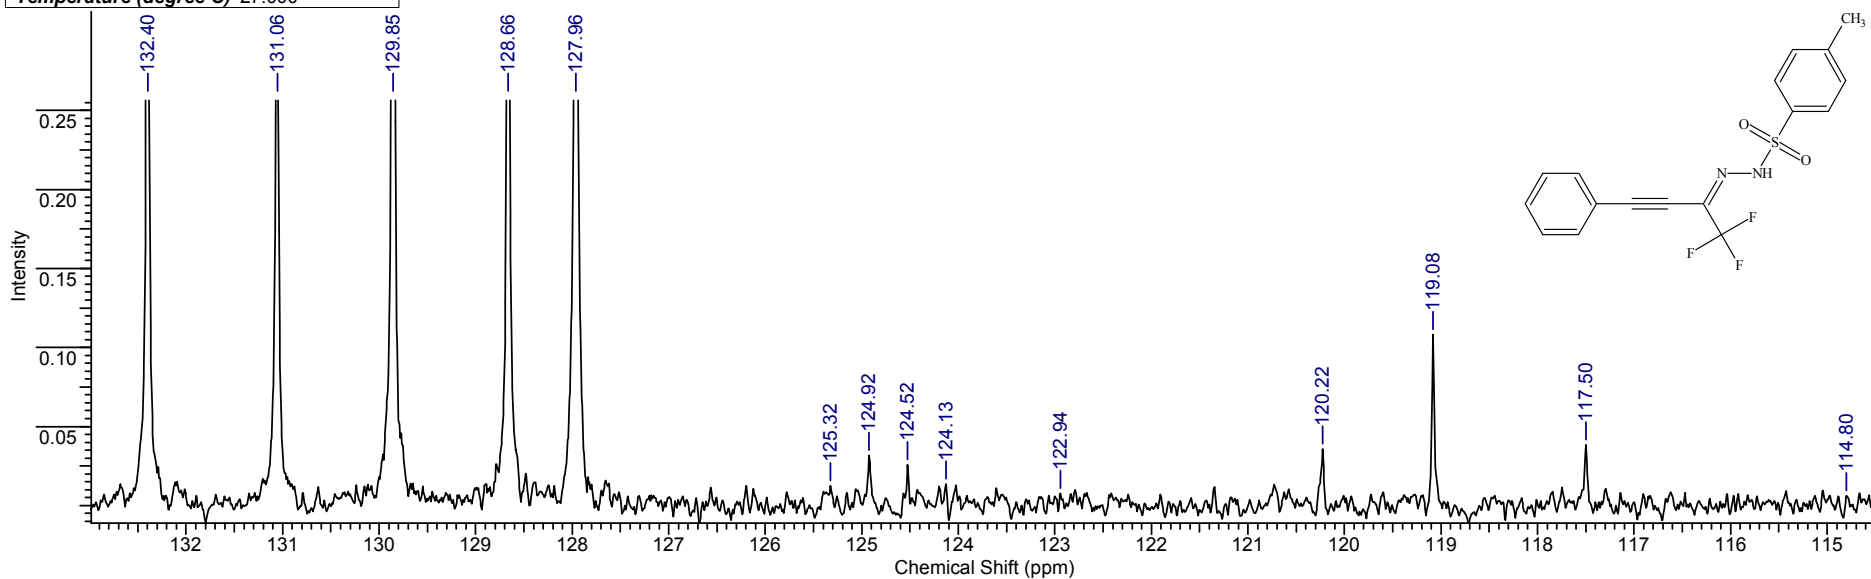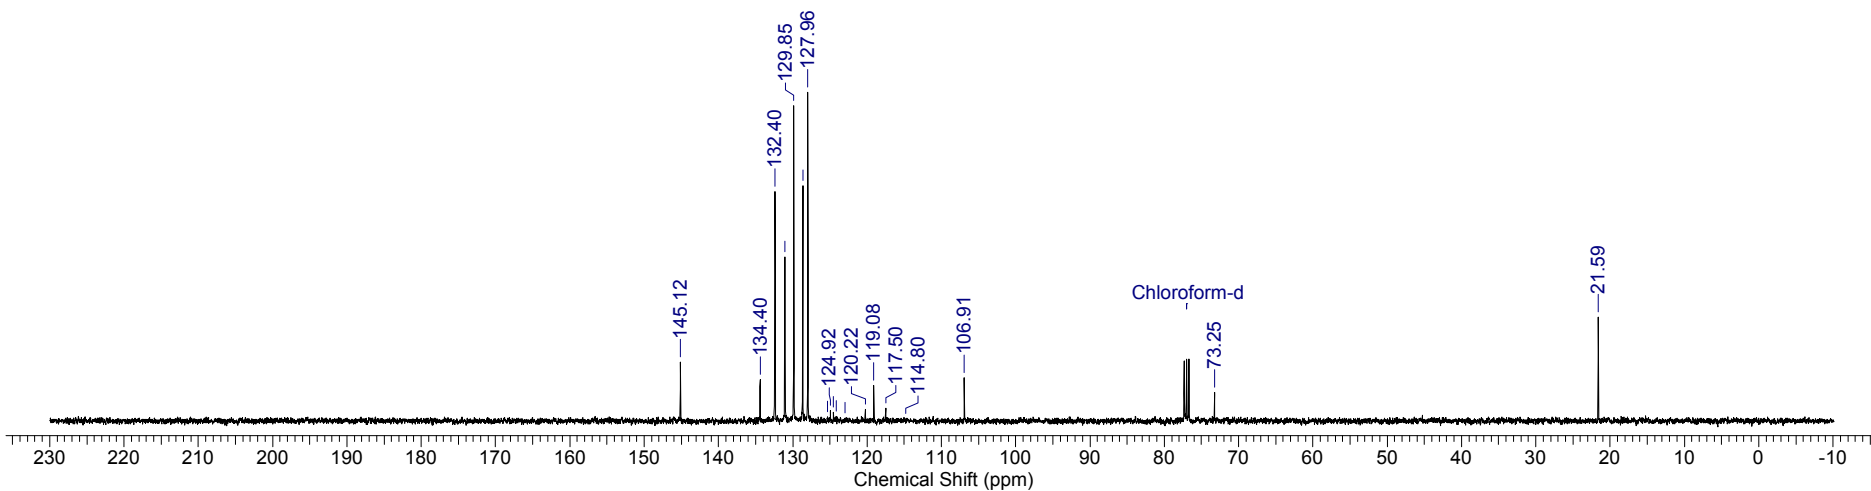

<sup>13</sup>C NMR spectrum of **3j** (100.6 MHz, CDCl<sub>3</sub>)



|           |          |                |                                                                                |
|-----------|----------|----------------|--------------------------------------------------------------------------------|
| <b>FW</b> | 366.3586 | <b>Formula</b> | C <sub>17</sub> H <sub>13</sub> F <sub>3</sub> N <sub>2</sub> O <sub>2</sub> S |
|-----------|----------|----------------|--------------------------------------------------------------------------------|

|                               |          |                               |             |                             |                                                                   |                              |        |
|-------------------------------|----------|-------------------------------|-------------|-----------------------------|-------------------------------------------------------------------|------------------------------|--------|
| <b>Acquisition Time (sec)</b> | 1.5000   | <b>Date</b>                   | Jun 19 2017 | <b>File Name</b>            | C:\BM_DATA\DOCS\SPEC_F_I-XII.2017\BM-1045_20170619_01\FLUORINE_01 |                              |        |
| <b>Frequency (MHz)</b>        | 376.31   | <b>Nucleus</b>                | 19F         | <b>Number of Transients</b> | 16                                                                | <b>Original Points Count</b> | 133929 |
| <b>Points Count</b>           | 262144   | <b>Pulse Sequence</b>         | s2pul       | <b>Solvent</b>              | CHLOROFORM-D                                                      |                              |        |
| <b>Sweep Width (Hz)</b>       | 89285.71 | <b>Temperature (degree C)</b> | 25.000      |                             |                                                                   |                              |        |

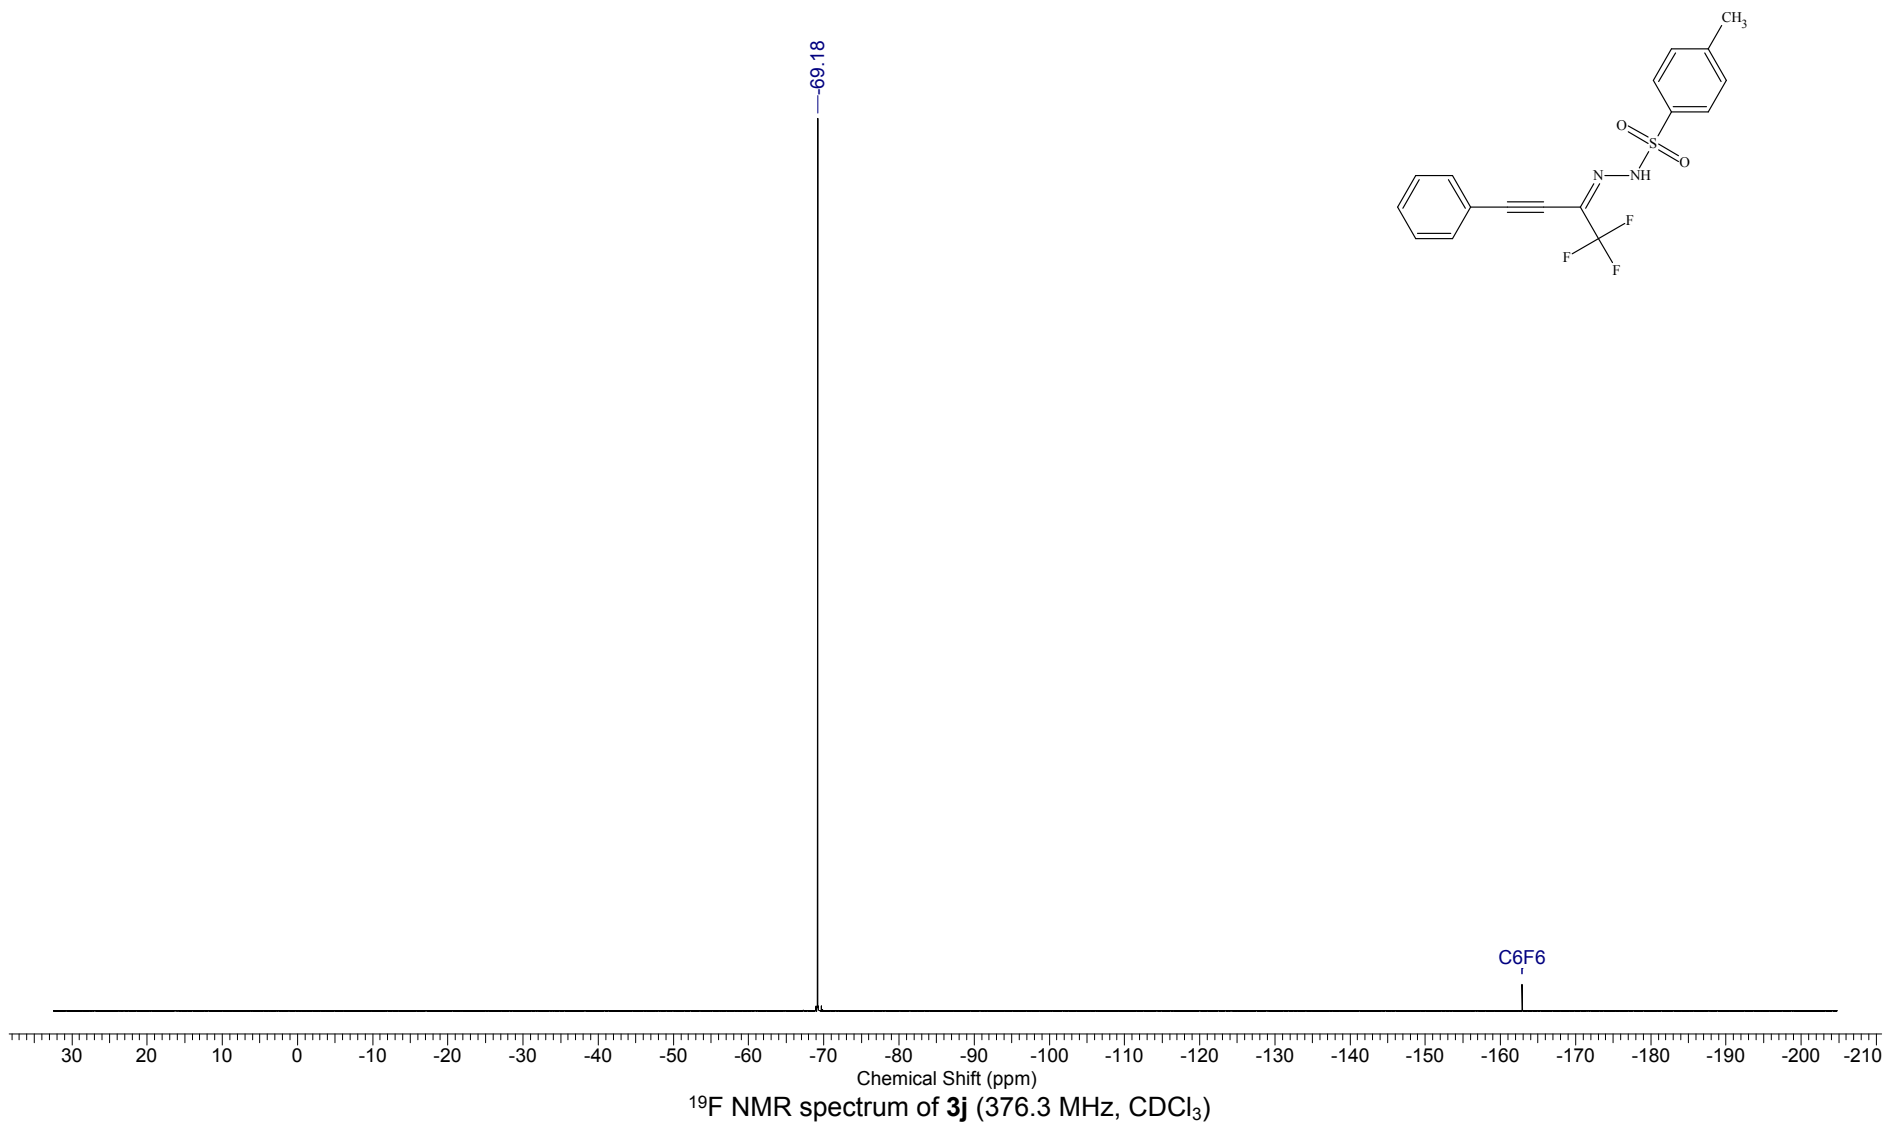

FW 268.2776 Formula C<sub>14</sub>H<sub>15</sub>F<sub>3</sub>N<sub>2</sub>

|                        |                                                             |                      |                      |                       |                      |
|------------------------|-------------------------------------------------------------|----------------------|----------------------|-----------------------|----------------------|
| Acquisition Time (sec) | 2.5559                                                      | Comment              | Imported from UXNMR. | Date                  | 03 Jun 2017 13:20:46 |
| File Name              | C:\IBM_DATA\DOCS\SPEC_BM_H,C_V-XII.2017\BM-1096-R.H_001001r |                      |                      | Frequency (MHz)       | 400.13               |
| Nucleus                | 1H                                                          | Number of Transients | 4                    | Original Points Count | 16384                |
| Pulse Sequence         | zg30                                                        | Solvent              | CHLOROFORM-D         | Points Count          | 65536                |
| Temperature (degree C) | 27.000                                                      |                      |                      | Sweep Width (Hz)      | 6410.26              |

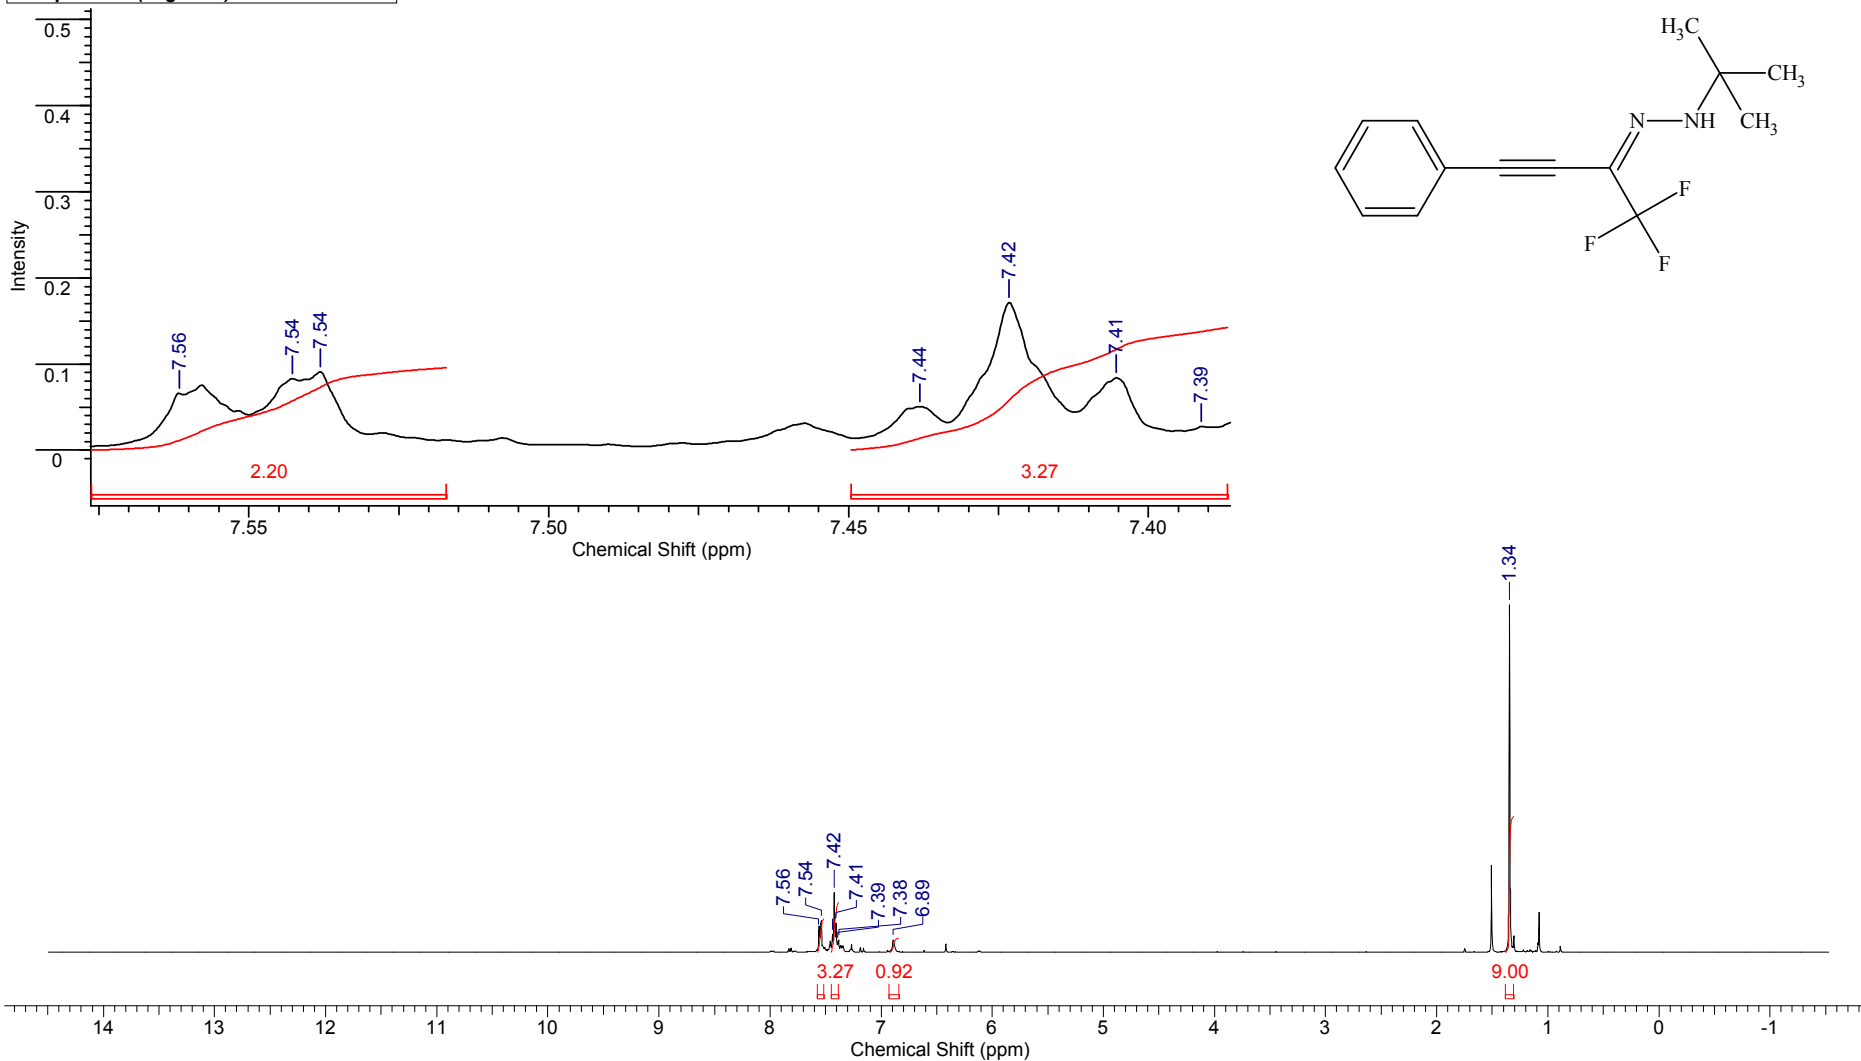

<sup>1</sup>H NMR spectrum of **3k** (400.1 MHz, CDCl<sub>3</sub>). Due to instability of **3k**, we did not succeed to obtain this compound in pure form. The purity of **3k** is about 85-90% accordingly NMR spectra.

|           |          |                |                                                               |
|-----------|----------|----------------|---------------------------------------------------------------|
| <b>FW</b> | 268.2776 | <b>Formula</b> | C <sub>14</sub> H <sub>15</sub> F <sub>3</sub> N <sub>2</sub> |
|-----------|----------|----------------|---------------------------------------------------------------|

|                               |                                                            |                             |                      |                              |                      |
|-------------------------------|------------------------------------------------------------|-----------------------------|----------------------|------------------------------|----------------------|
| <b>Acquisition Time (sec)</b> | 0.4999                                                     | <b>Comment</b>              | Imported from UXMNR. | <b>Date</b>                  | 03 Jun 2017 13:25:16 |
| <b>File Name</b>              | C:\BM_DATA\DOCS\SPEC_BM_H,C_V-XII.2017\BM-1096-R.C_002001r |                             |                      | <b>Frequency (MHz)</b>       | 100.61               |
| <b>Nucleus</b>                | 13C                                                        | <b>Number of Transients</b> | 77                   | <b>Original Points Count</b> | 12076                |
| <b>Pulse Sequence</b>         | zgpg30                                                     | <b>Solvent</b>              | CHLOROFORM-D         | <b>Points Count</b>          | 65536                |
| <b>Temperature (degree C)</b> | 27.000                                                     |                             |                      | <b>Sweep Width (Hz)</b>      | 24154.59             |

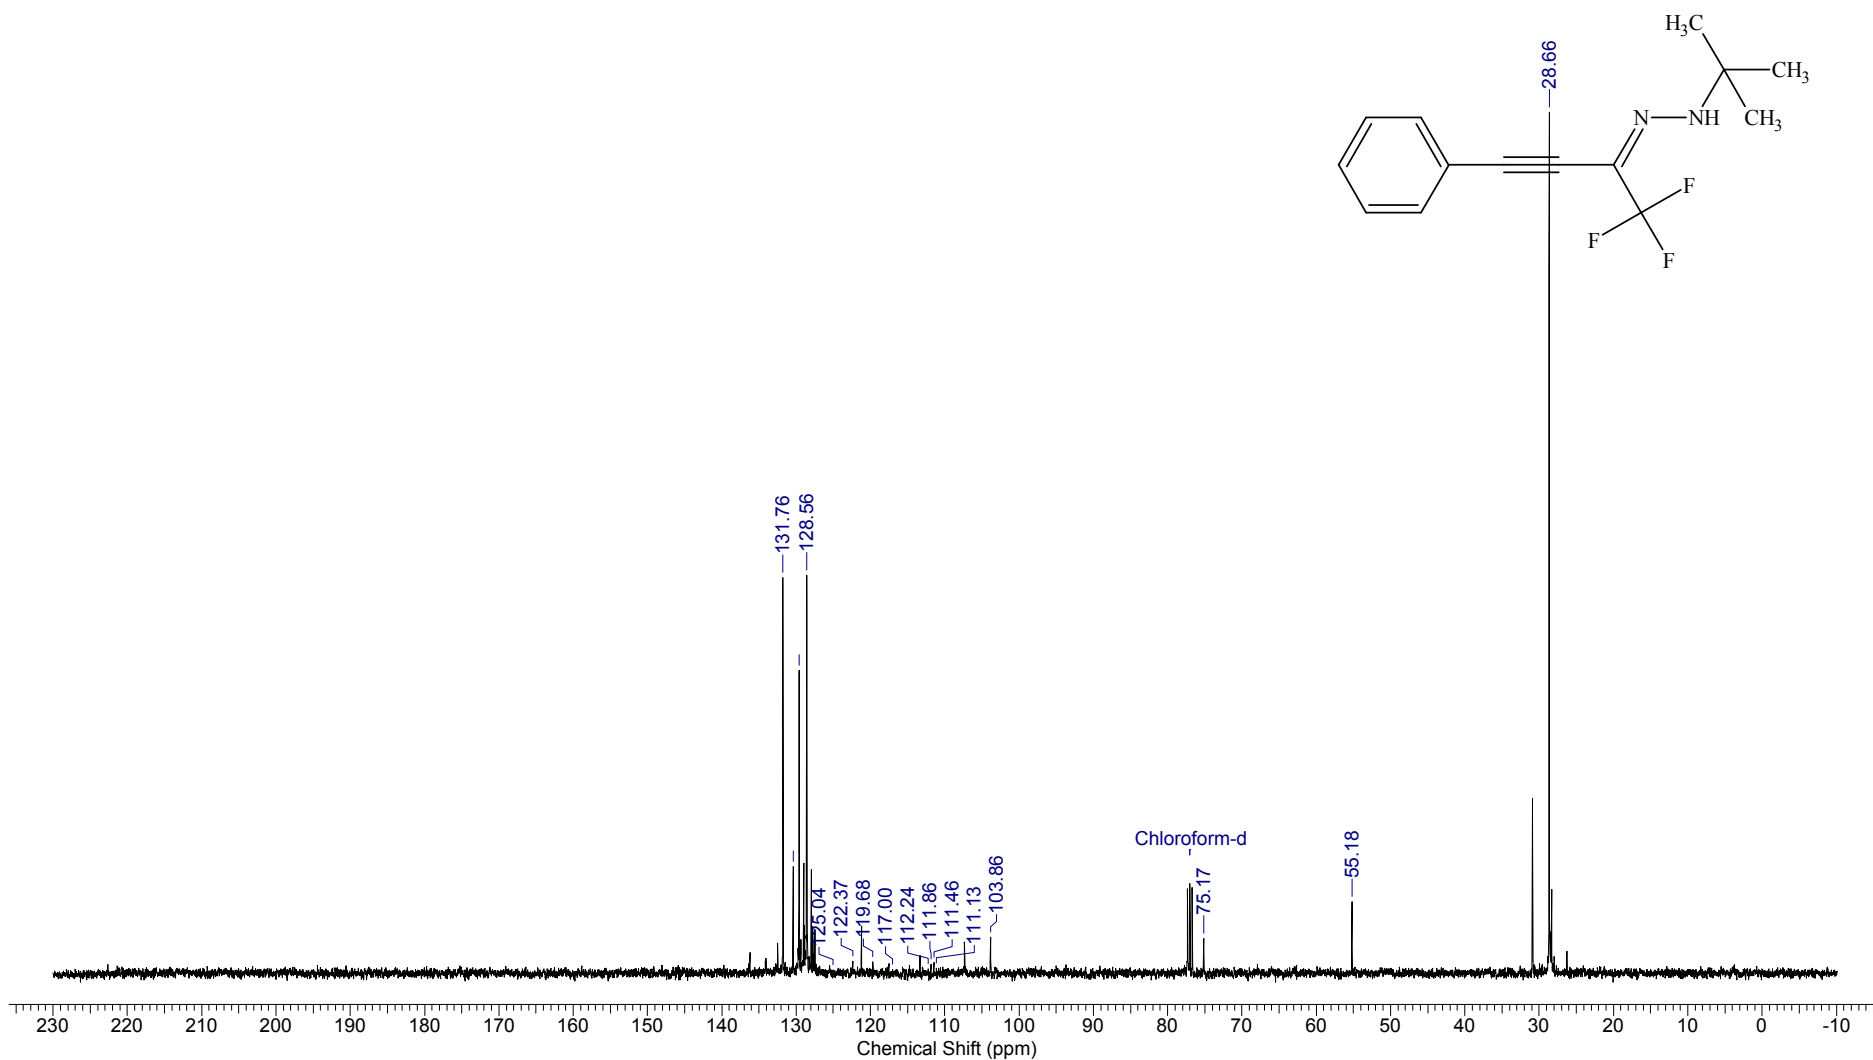

<sup>13</sup>C NMR spectrum of **3k** (100.6 MHz, CDCl<sub>3</sub>). Due to instability of **3k**, we did not succeed to obtain this compound in pure form. The purity of **3k** is about 85-90% accordingly NMR spectra.

|           |          |                |                                                               |
|-----------|----------|----------------|---------------------------------------------------------------|
| <b>FW</b> | 268.2776 | <b>Formula</b> | C <sub>14</sub> H <sub>15</sub> F <sub>3</sub> N <sub>2</sub> |
|-----------|----------|----------------|---------------------------------------------------------------|

|                               |          |                               |                 |                             |                                                                     |                              |        |
|-------------------------------|----------|-------------------------------|-----------------|-----------------------------|---------------------------------------------------------------------|------------------------------|--------|
| <b>Acquisition Time (sec)</b> | 1.5000   | <b>Date</b>                   | Jun 5 2017      | <b>File Name</b>            | C:\BM_DATA\DOCS\SPEC_F_I-XII.2017\BM-1096-R_20170605_01\FLUORINE_01 |                              |        |
| <b>Frequency (MHz)</b>        | 376.31   | <b>Nucleus</b>                | <sup>19</sup> F | <b>Number of Transients</b> | 16                                                                  | <b>Original Points Count</b> | 133929 |
| <b>Points Count</b>           | 262144   | <b>Pulse Sequence</b>         | s2pul           | <b>Solvent</b>              | CHLOROFORM-D                                                        |                              |        |
| <b>Sweep Width (Hz)</b>       | 89285.71 | <b>Temperature (degree C)</b> | 25.000          |                             |                                                                     |                              |        |

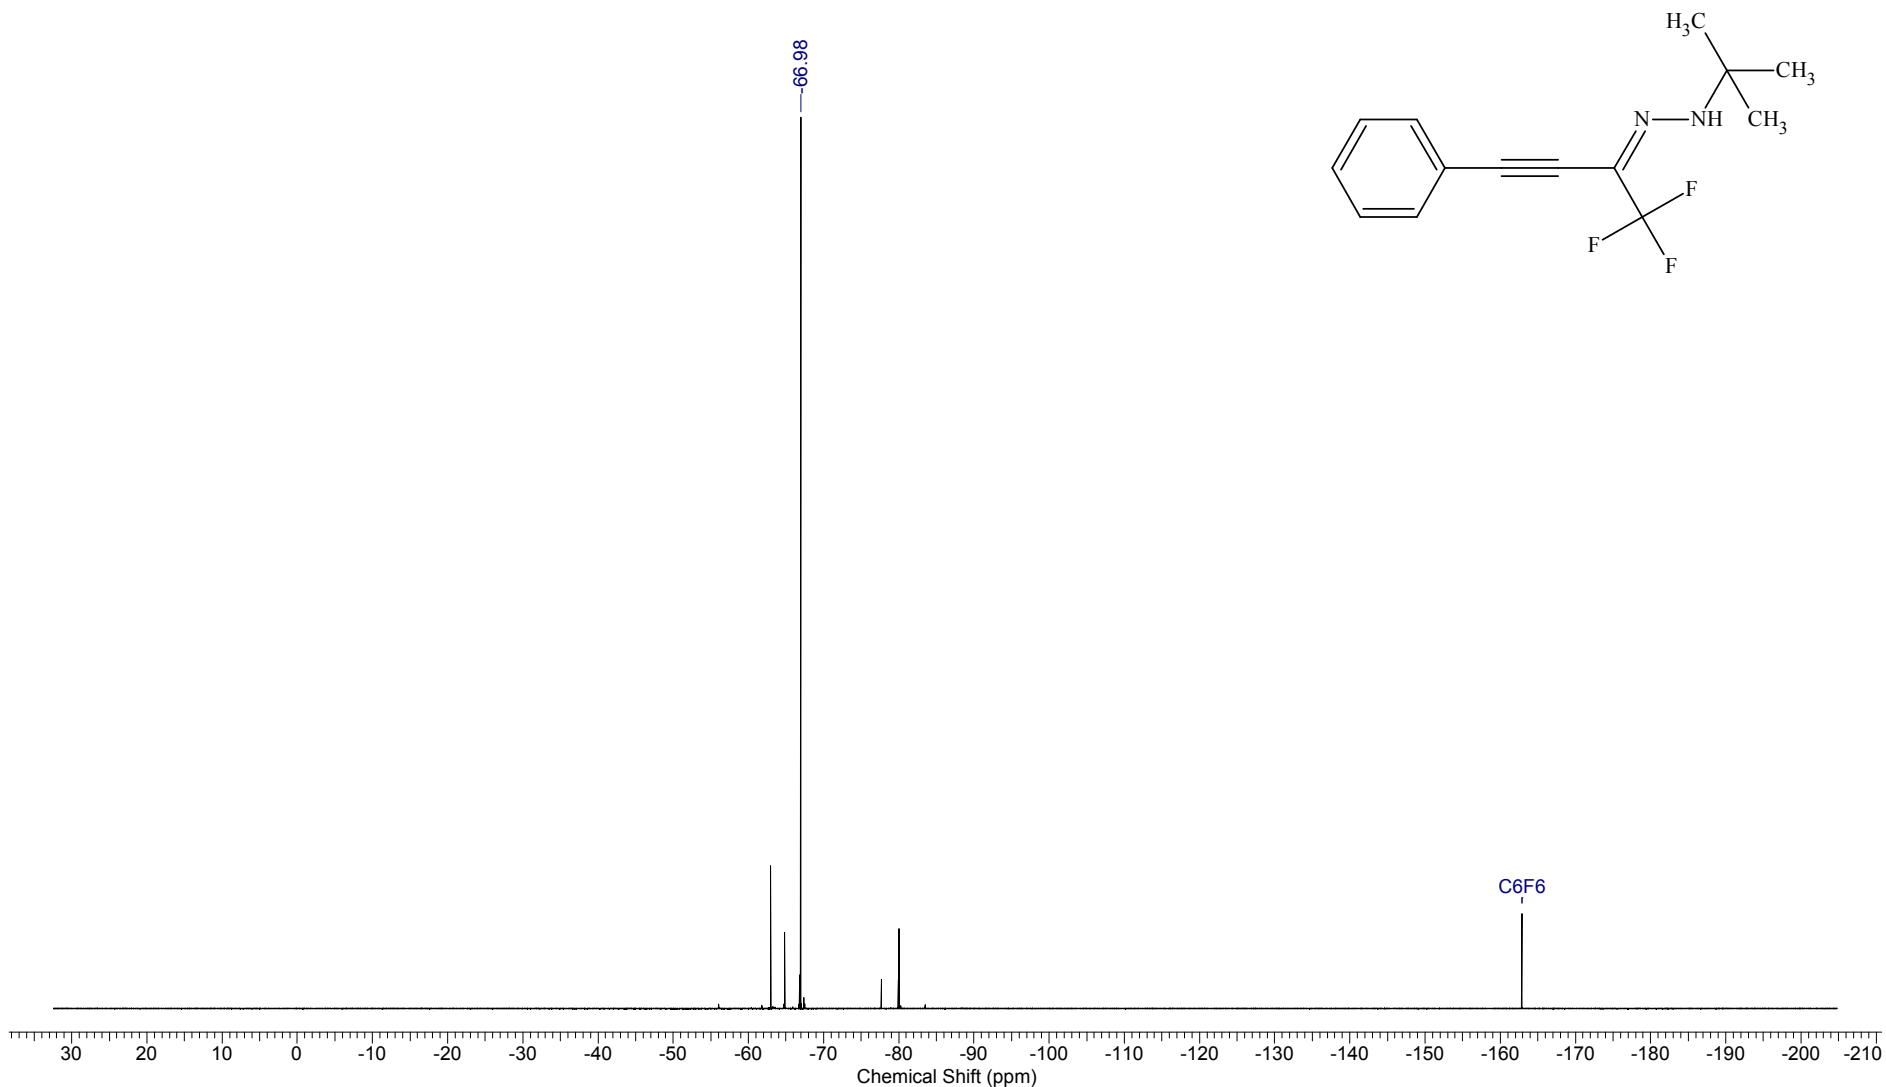

<sup>19</sup>F NMR spectrum of **3k** (376.3 MHz, CDCl<sub>3</sub>). Due to instability of **3k**, we did not succeed to obtain this compound in pure form. The purity of **3k** is about 85-90% accordingly NMR spectra.

FW 302.2938 Formula C<sub>17</sub>H<sub>13</sub>F<sub>3</sub>N<sub>2</sub>

| Acquisition Time (sec) | 2.9295                                 | Comment                | Imported from UXNMR. |                | Date | 27 Apr 2017 22:40:32 |              |
|------------------------|----------------------------------------|------------------------|----------------------|----------------|------|----------------------|--------------|
| File Name              | C:\BM_DATA\BM-1051-d\BM-1051-d_001001r | Frequency (MHz)        | 400.13               | Nucleus        | 1H   | Number of Transients | 8            |
| Original Points Count  | 16384                                  | Points Count           | 65536                | Pulse Sequence | zg30 | Solvent              | CHLOROFORM-D |
| Sweep Width (Hz)       | 5592.84                                | Temperature (degree C) | 27.000               |                |      |                      |              |

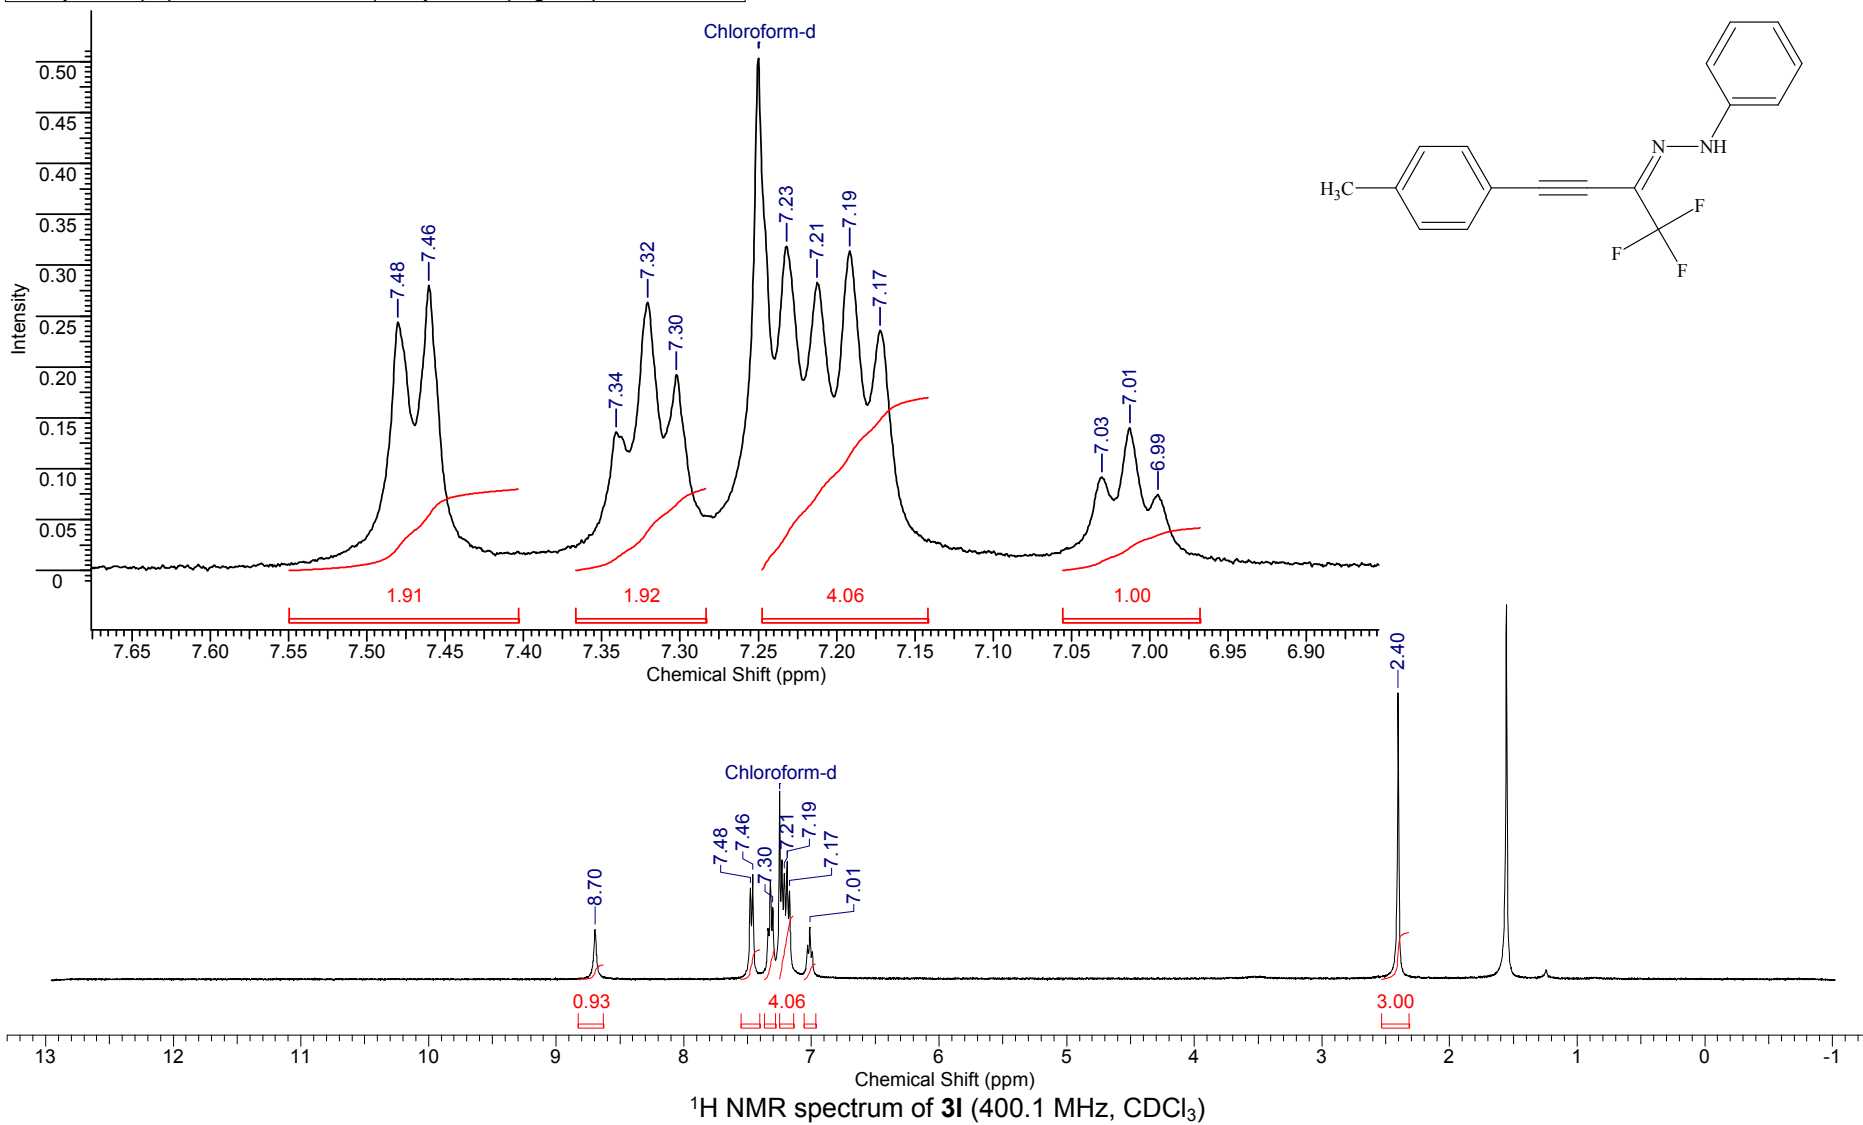

**FW** 302.2938 **Formula** C<sub>17</sub>H<sub>13</sub>F<sub>3</sub>N<sub>2</sub>

|                               |                                                           |                             |                      |                              |                      |
|-------------------------------|-----------------------------------------------------------|-----------------------------|----------------------|------------------------------|----------------------|
| <b>Acquisition Time (sec)</b> | 0.4999                                                    | <b>Comment</b>              | Imported from UXMNR. | <b>Date</b>                  | 28 Apr 2017 15:39:12 |
| <b>File Name</b>              | C:\BM_DATA\DOCS\SPEC_BM_H,C_I-IV.2017\BM-1051-d.C_002001r |                             |                      | <b>Frequency (MHz)</b>       | 100.61               |
| <b>Nucleus</b>                | 13C                                                       | <b>Number of Transients</b> | 397                  | <b>Original Points Count</b> | 12076                |
| <b>Pulse Sequence</b>         | zgpg30                                                    | <b>Solvent</b>              | CHLOROFORM-D         | <b>Points Count</b>          | 65536                |
| <b>Temperature (degree C)</b> | 27.000                                                    |                             |                      | <b>Sweep Width (Hz)</b>      | 24154.59             |

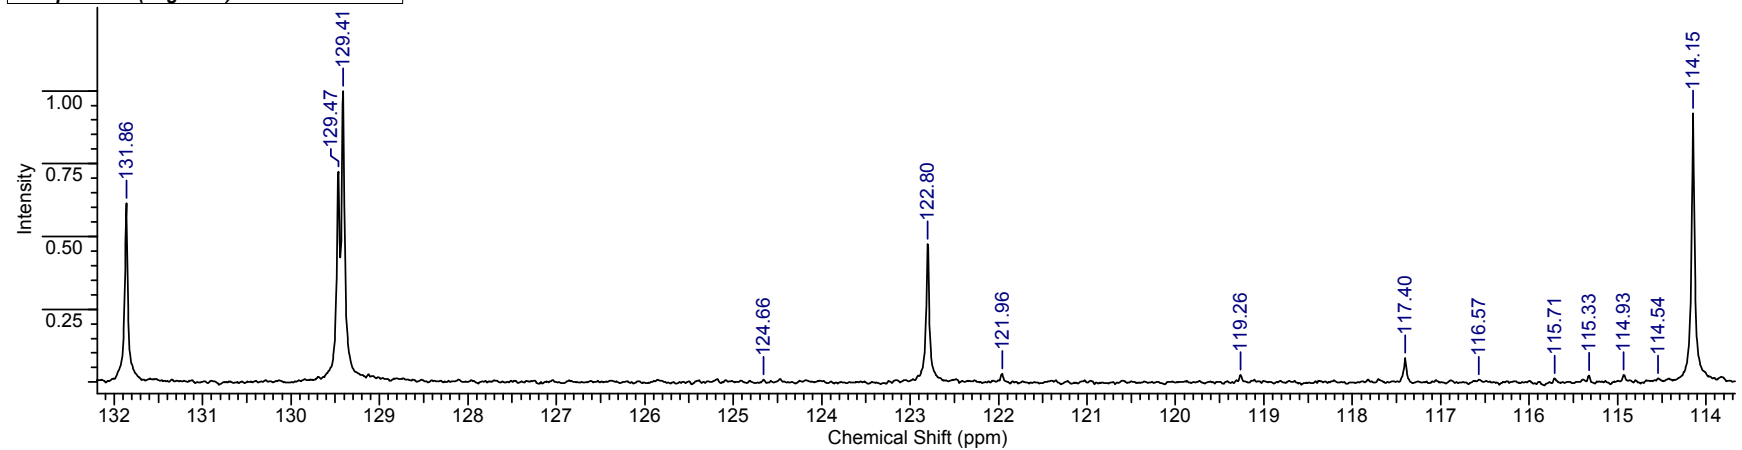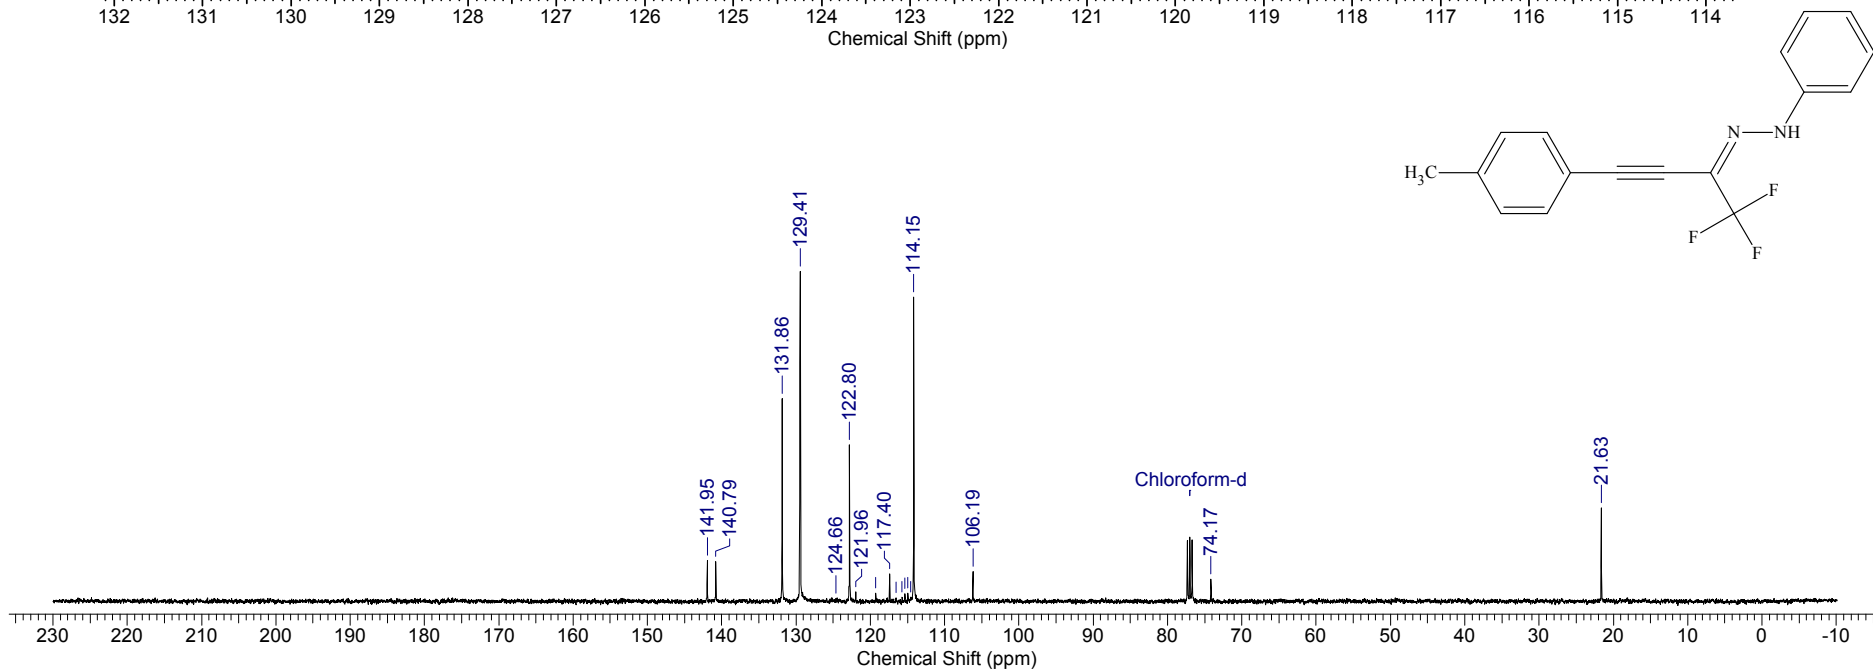

<sup>13</sup>C NMR spectrum of **3I** (100.6 MHz, CDCl<sub>3</sub>)

|           |          |                |                                                               |
|-----------|----------|----------------|---------------------------------------------------------------|
| <b>FW</b> | 302.2938 | <b>Formula</b> | C <sub>17</sub> H <sub>13</sub> F <sub>3</sub> N <sub>2</sub> |
|-----------|----------|----------------|---------------------------------------------------------------|

|                               |          |                               |                 |                             |                                                                   |                              |       |
|-------------------------------|----------|-------------------------------|-----------------|-----------------------------|-------------------------------------------------------------------|------------------------------|-------|
| <b>Acquisition Time (sec)</b> | 1.0000   | <b>Date</b>                   | Apr 28 2017     | <b>File Name</b>            | C:\BM_DATA\DOCS\SPEC_F_I-XII.2017\BM-1051_20170428_01\FLUORINE_01 |                              |       |
| <b>Frequency (MHz)</b>        | 376.31   | <b>Nucleus</b>                | <sup>19</sup> F | <b>Number of Transients</b> | 16                                                                | <b>Original Points Count</b> | 89286 |
| <b>Points Count</b>           | 131072   | <b>Pulse Sequence</b>         | s2pul           | <b>Solvent</b>              | CHLOROFORM-D                                                      |                              |       |
| <b>Sweep Width (Hz)</b>       | 89285.71 | <b>Temperature (degree C)</b> | 25.000          |                             |                                                                   |                              |       |

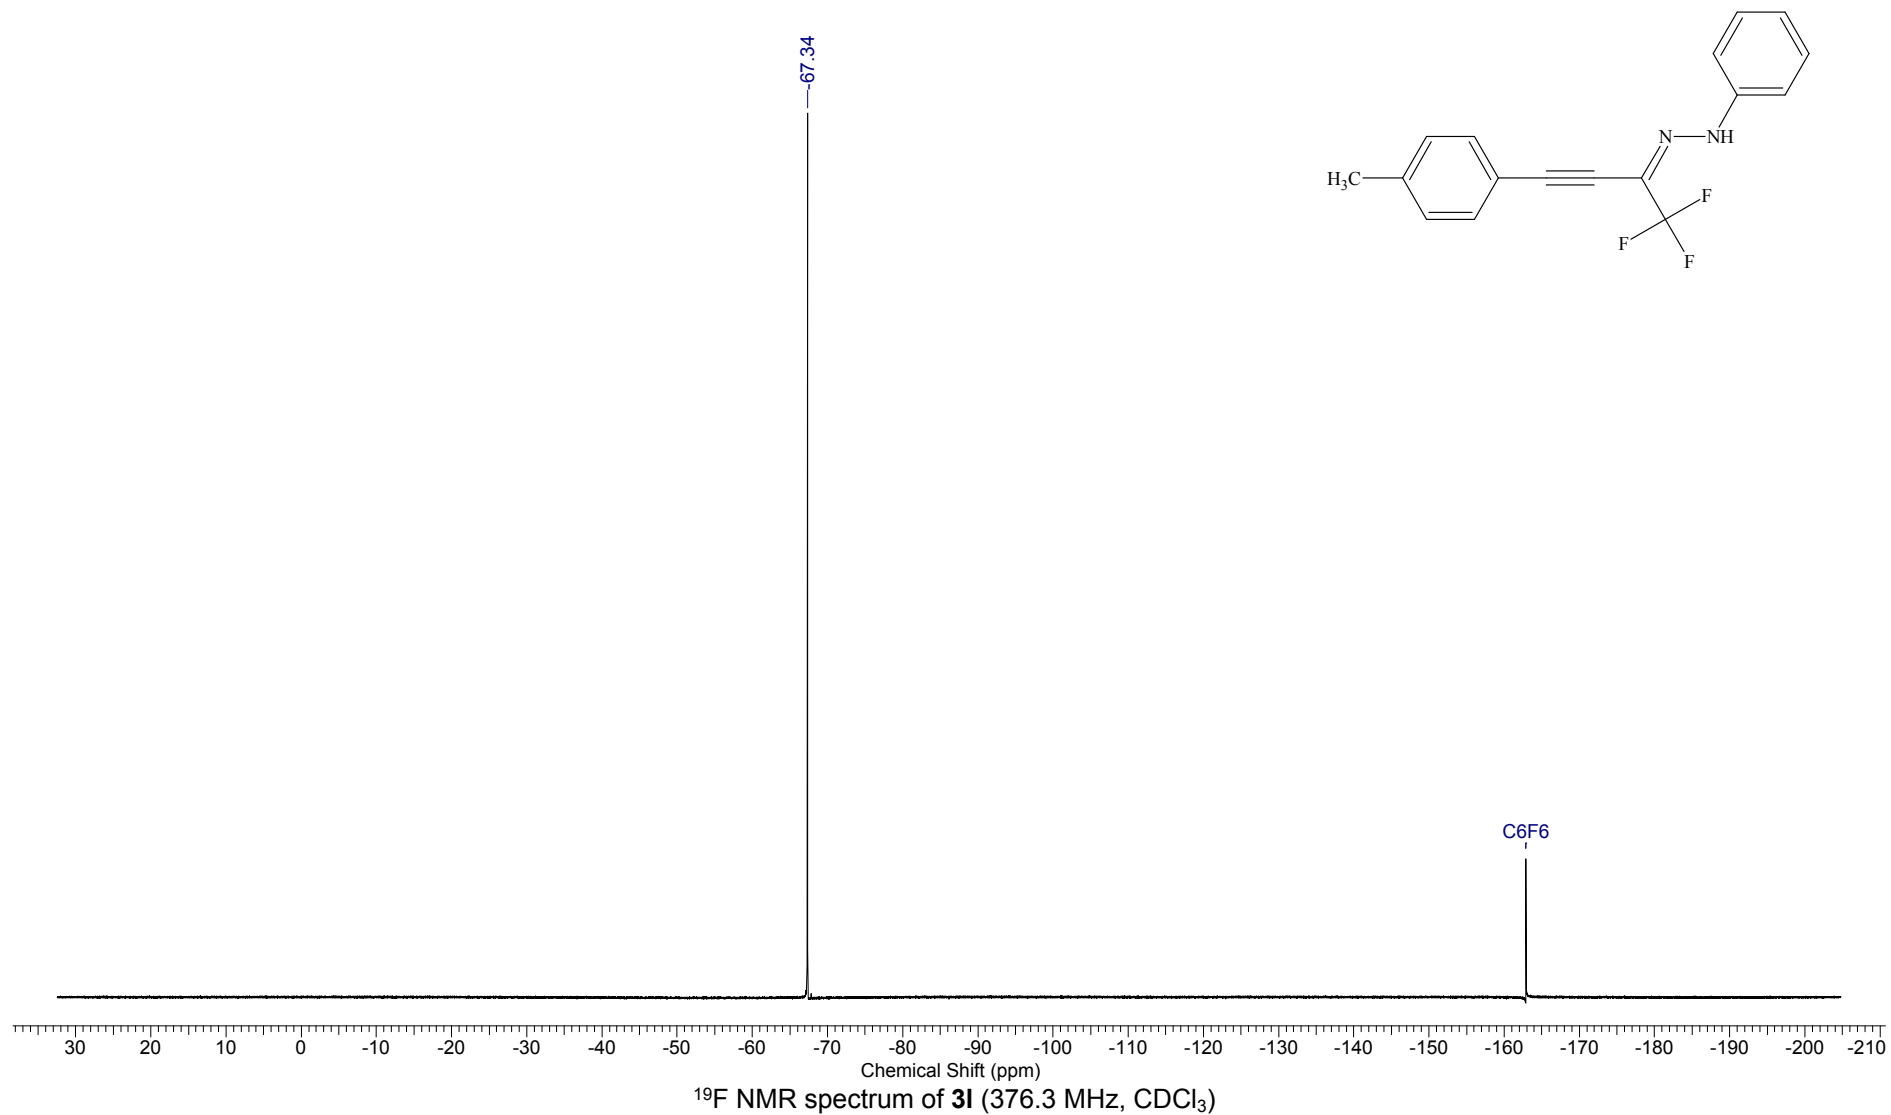

**FW** 318.2932 **Formula** C<sub>17</sub>H<sub>13</sub>F<sub>3</sub>N<sub>2</sub>O

|                               |                                                        |                             |                      |                              |                      |
|-------------------------------|--------------------------------------------------------|-----------------------------|----------------------|------------------------------|----------------------|
| <b>Acquisition Time (sec)</b> | 2.5559                                                 | <b>Comment</b>              | Imported from UXMNR. | <b>Date</b>                  | 21 Mar 2017 14:28:22 |
| <b>File Name</b>              | C:\BM_DATA\DOCS\SPEC_BM_H,C I-IV.2017\BM-975.H_001001r |                             |                      | <b>Frequency (MHz)</b>       | 400.13               |
| <b>Nucleus</b>                | 1H                                                     | <b>Number of Transients</b> | 4                    | <b>Original Points Count</b> | 16384                |
| <b>Pulse Sequence</b>         | zg30                                                   | <b>Solvent</b>              | CHLOROFORM-D         | <b>Points Count</b>          | 65536                |
| <b>Temperature (degree C)</b> | 27.000                                                 |                             |                      | <b>Sweep Width (Hz)</b>      | 6410.26              |

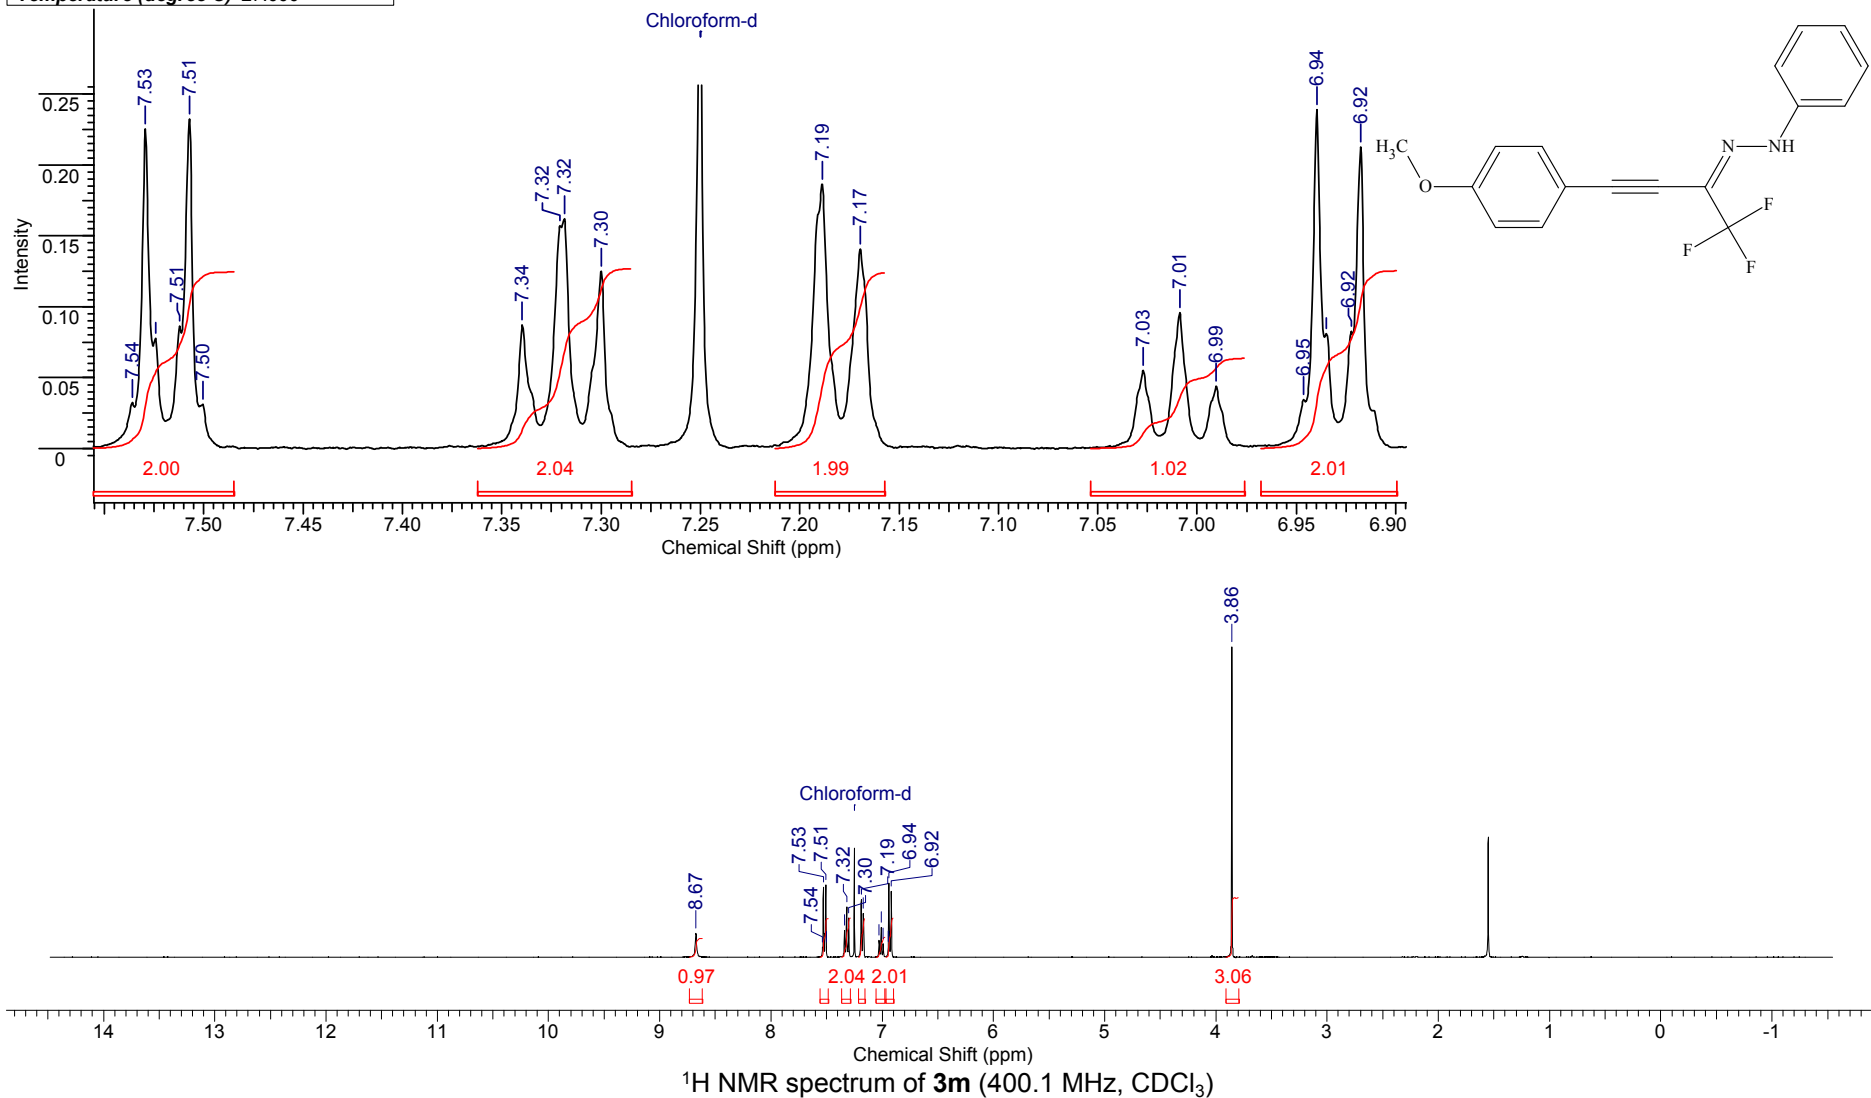



**FW** 318.2932 **Formula** C<sub>17</sub>H<sub>13</sub>F<sub>3</sub>N<sub>2</sub>O

|                               |                                                          |                             |                      |                              |                      |
|-------------------------------|----------------------------------------------------------|-----------------------------|----------------------|------------------------------|----------------------|
| <b>Acquisition Time (sec)</b> | 0.4999                                                   | <b>Comment</b>              | Imported from UXMNR. | <b>Date</b>                  | 27 Apr 2017 11:30:26 |
| <b>File Name</b>              | C:\BM_DATA\DOCS\SPEC_BM_H,C_I-IV.2017\BM-975-c.c_002001r |                             |                      | <b>Frequency (MHz)</b>       | 100.61               |
| <b>Nucleus</b>                | 13C                                                      | <b>Number of Transients</b> | 282                  | <b>Original Points Count</b> | 12076                |
| <b>Pulse Sequence</b>         | zgpg30                                                   | <b>Solvent</b>              | CHLOROFORM-D         | <b>Points Count</b>          | 65536                |
| <b>Temperature (degree C)</b> | 27.000                                                   |                             |                      | <b>Sweep Width (Hz)</b>      | 24154.59             |

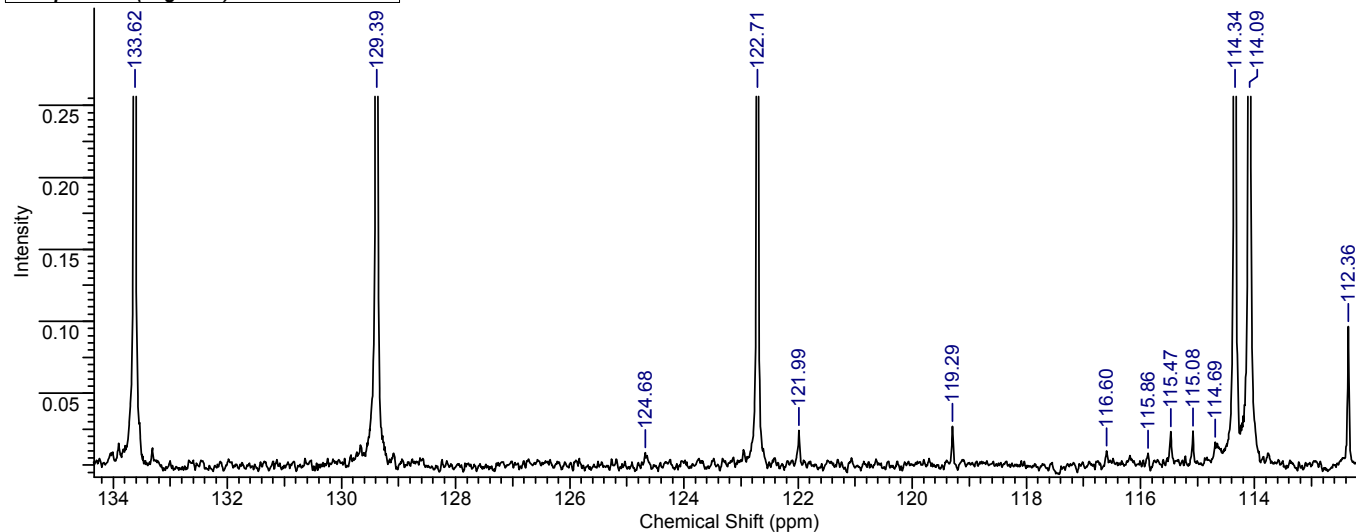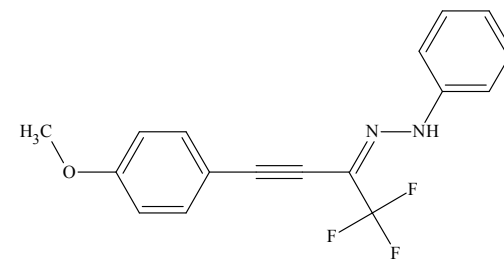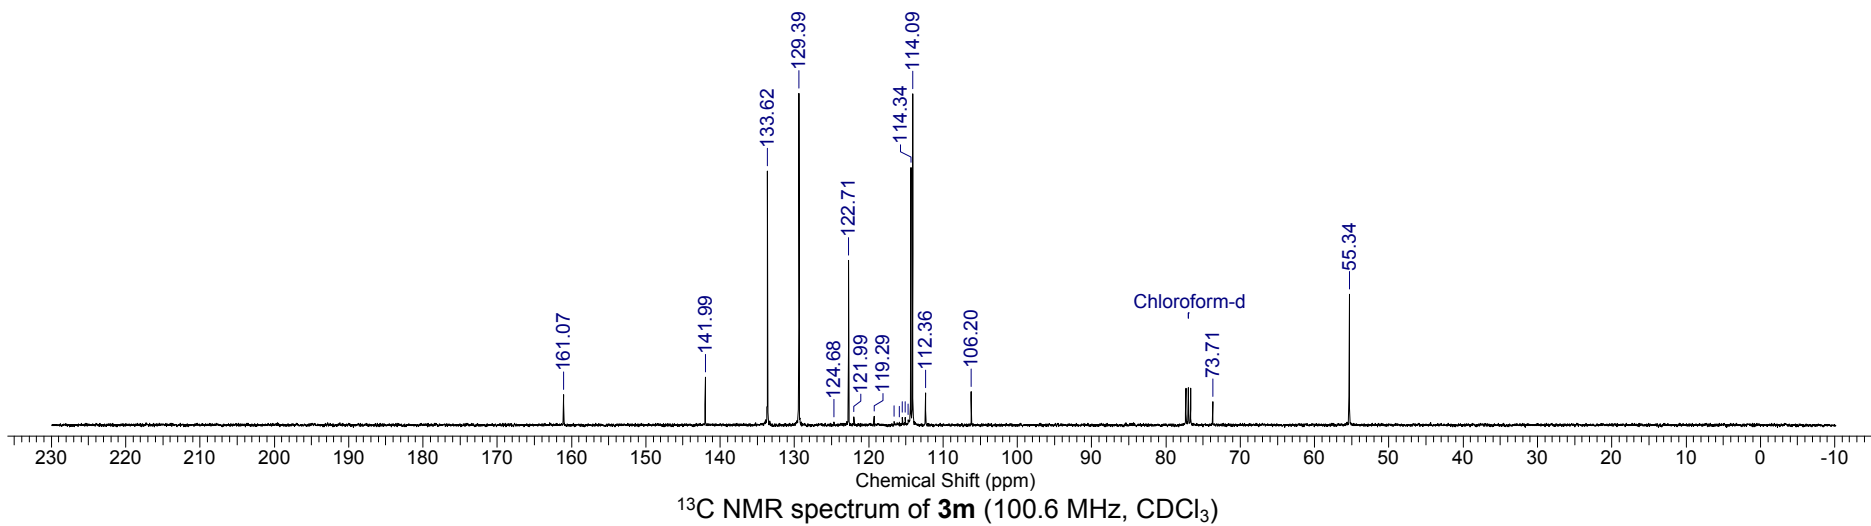

|           |          |                |                                                                 |
|-----------|----------|----------------|-----------------------------------------------------------------|
| <b>FW</b> | 318.2932 | <b>Formula</b> | C <sub>17</sub> H <sub>13</sub> F <sub>3</sub> N <sub>2</sub> O |
|-----------|----------|----------------|-----------------------------------------------------------------|

|                               |          |                               |                 |                             |                                                                  |                              |       |
|-------------------------------|----------|-------------------------------|-----------------|-----------------------------|------------------------------------------------------------------|------------------------------|-------|
| <b>Acquisition Time (sec)</b> | 1.0000   | <b>Date</b>                   | Mar 17 2017     | <b>File Name</b>            | C:\BM_DATA\DOCS\SPEC_F_I-XII.2017\BM-975_20170317_01\FLUORINE_01 |                              |       |
| <b>Frequency (MHz)</b>        | 376.31   | <b>Nucleus</b>                | <sup>19</sup> F | <b>Number of Transients</b> | 1                                                                | <b>Original Points Count</b> | 89286 |
| <b>Points Count</b>           | 131072   | <b>Pulse Sequence</b>         | s2pul           | <b>Solvent</b>              | CHLOROFORM-D                                                     |                              |       |
| <b>Sweep Width (Hz)</b>       | 89285.71 | <b>Temperature (degree C)</b> | 25.000          |                             |                                                                  |                              |       |

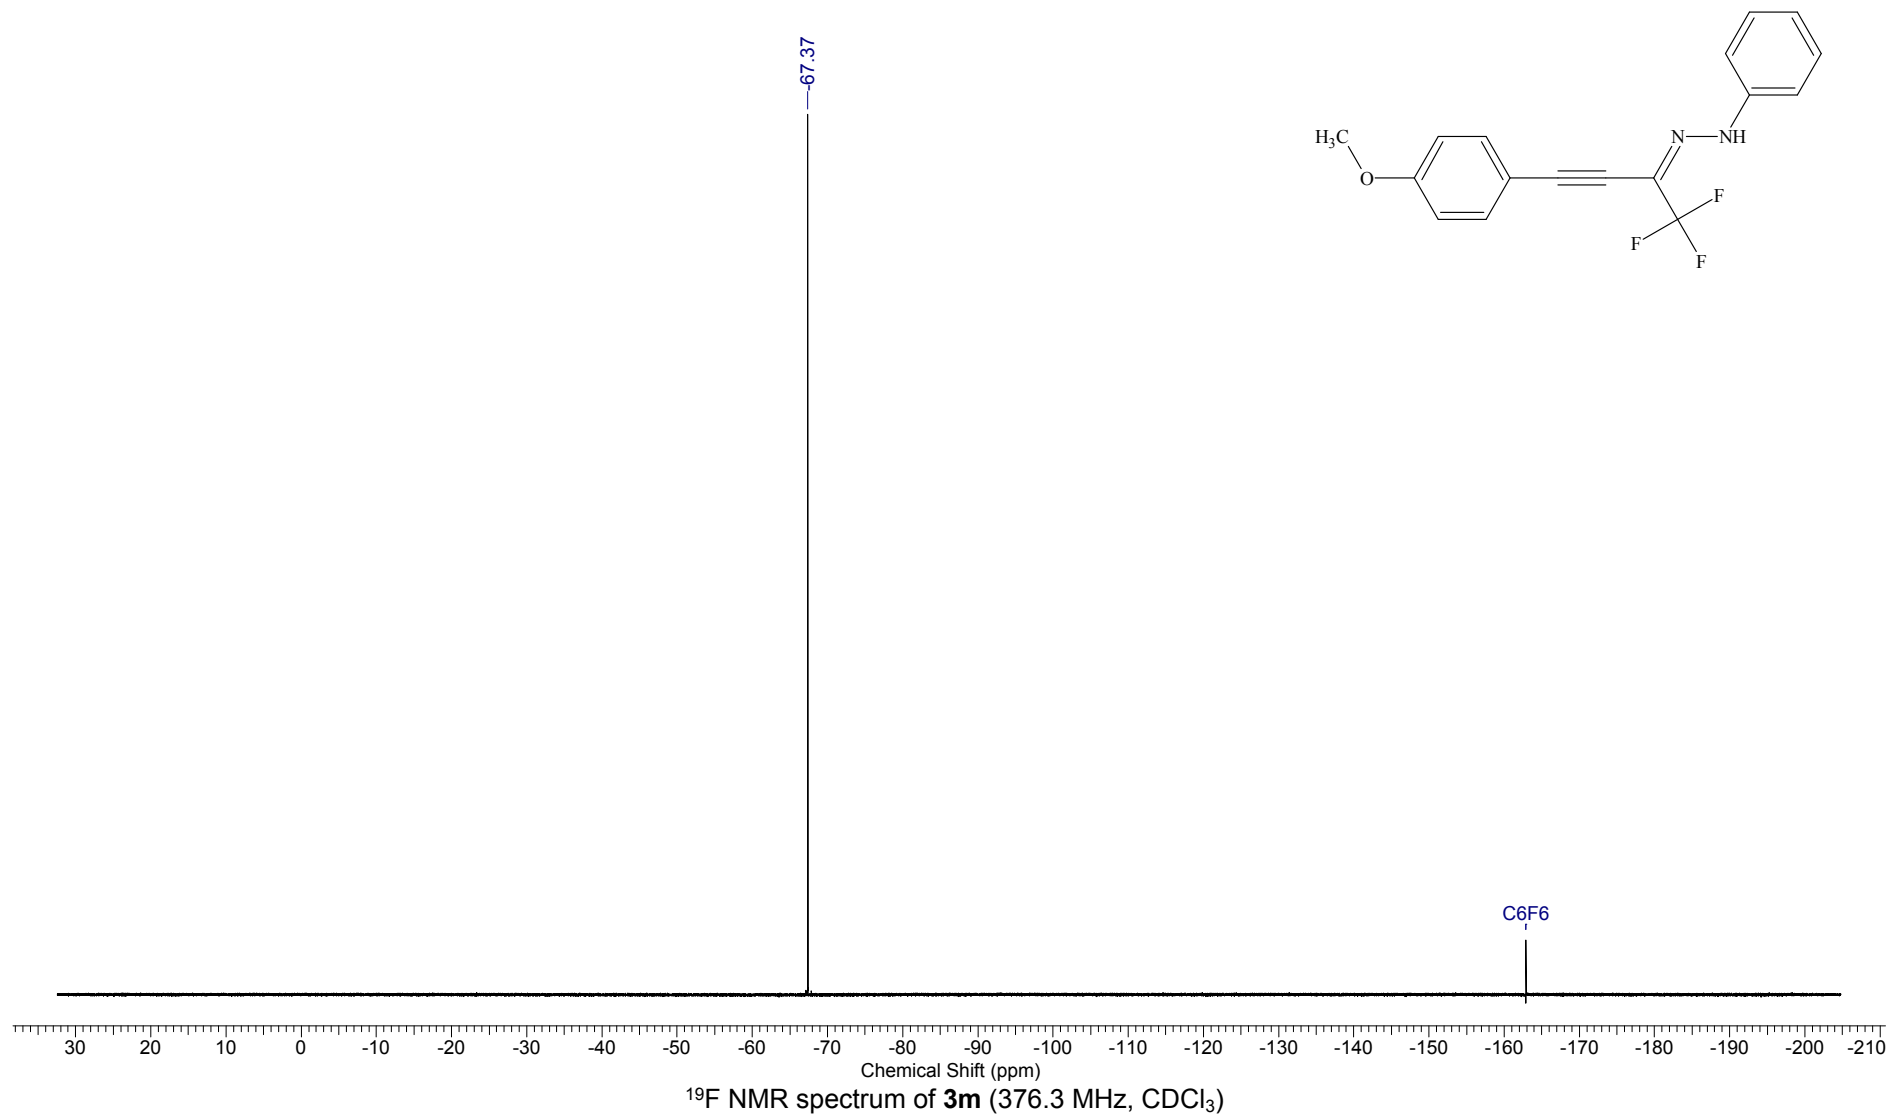

FW 334.3598 Formula C<sub>17</sub>H<sub>13</sub>F<sub>3</sub>N<sub>2</sub>S

|                        |                                                         |                      |                      |                       |                      |
|------------------------|---------------------------------------------------------|----------------------|----------------------|-----------------------|----------------------|
| Acquisition Time (sec) | 2.5559                                                  | Comment              | Imported from UXMNR. | Date                  | 28 Apr 2017 15:18:18 |
| File Name              | C:\BM_DATA\DOCS\SPEC_BM_H,C_I-IV.2017\BM-1050.H_001001r |                      |                      | Frequency (MHz)       | 400.13               |
| Nucleus                | 1H                                                      | Number of Transients | 4                    | Original Points Count | 16384                |
| Pulse Sequence         | zg30                                                    | Solvent              | CHLOROFORM-D         | Points Count          | 65536                |
| Temperature (degree C) | 27.000                                                  |                      |                      | Sweep Width (Hz)      | 6410.26              |

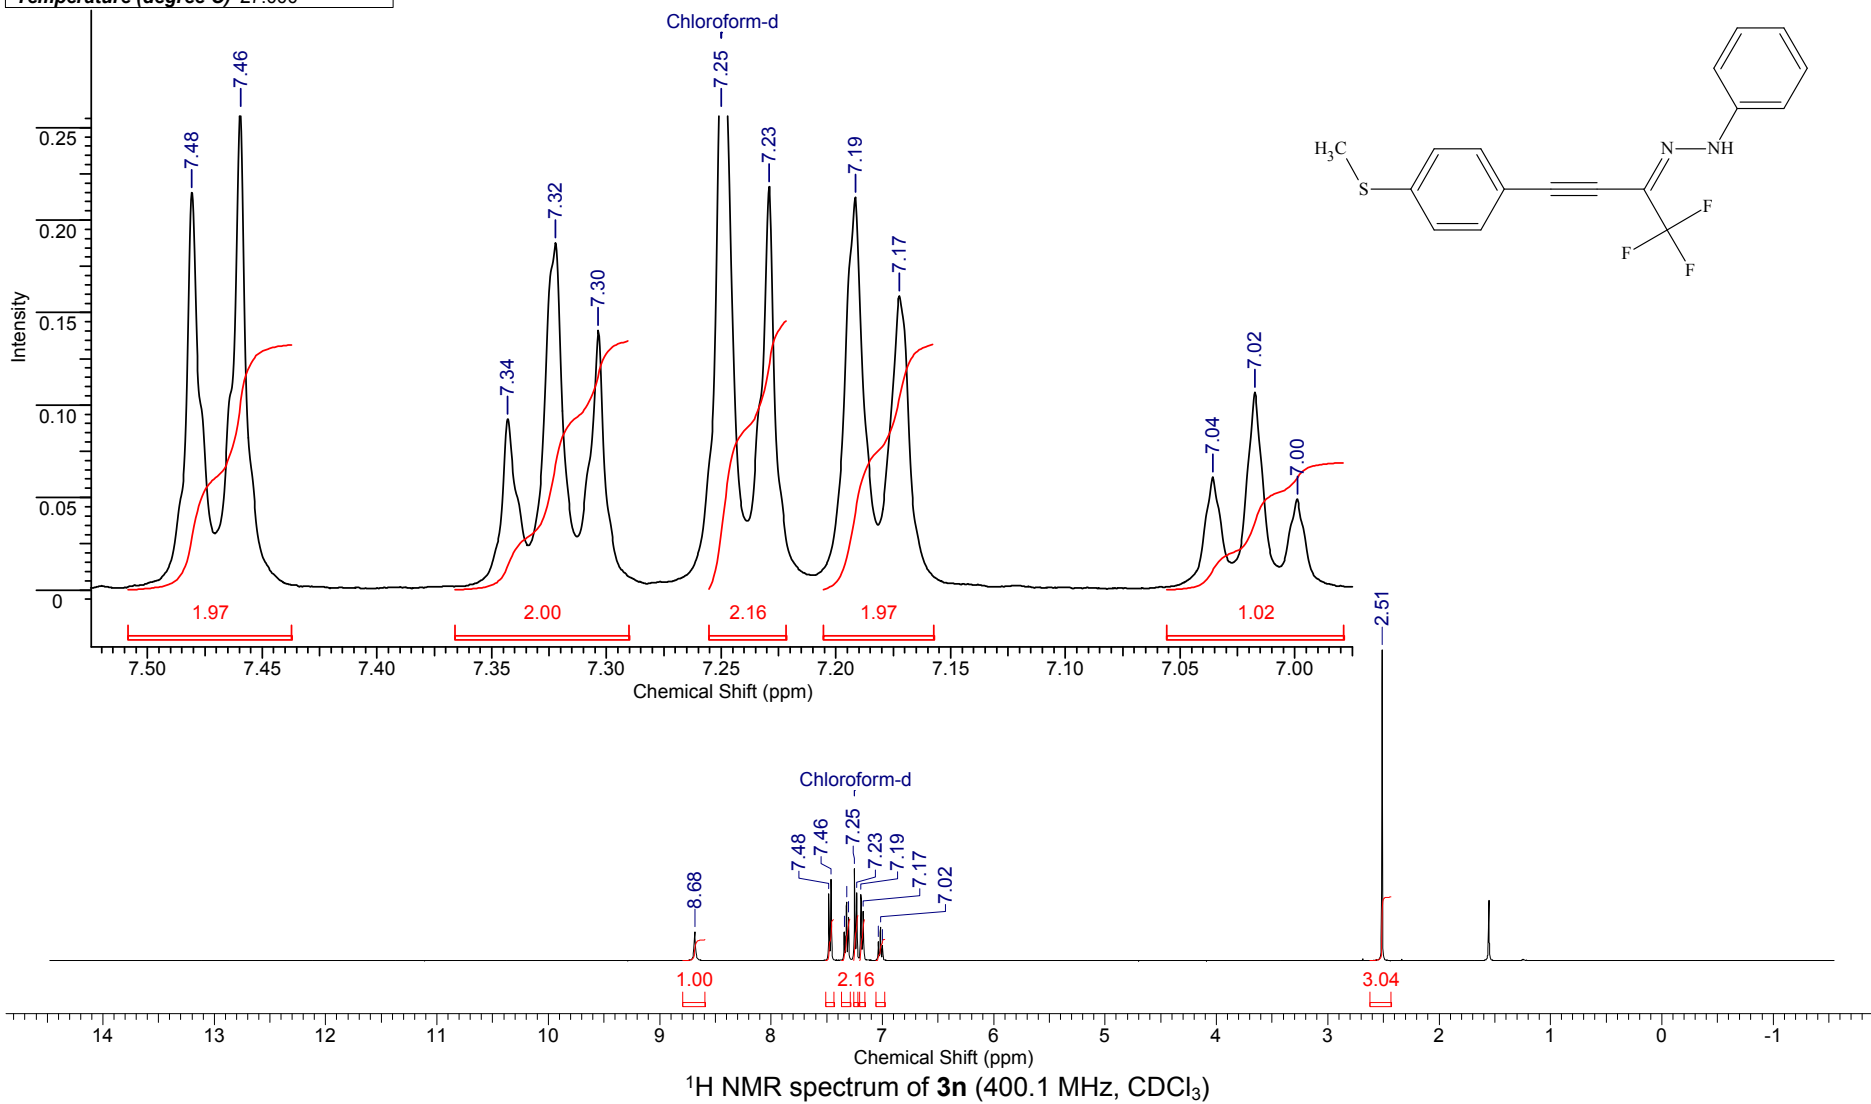

**FW** 334.3598 **Formula** C<sub>17</sub>H<sub>13</sub>F<sub>3</sub>N<sub>2</sub>S

|                               |                                                         |                             |                      |                              |                      |
|-------------------------------|---------------------------------------------------------|-----------------------------|----------------------|------------------------------|----------------------|
| <b>Acquisition Time (sec)</b> | 0.4999                                                  | <b>Comment</b>              | Imported from UXMNR. | <b>Date</b>                  | 29 Apr 2017 13:37:50 |
| <b>File Name</b>              | C:\BM_DATA\DOCS\SPEC_BM_H,C_I-IV.2017\BM-1050.C_002001r |                             |                      | <b>Frequency (MHz)</b>       | 100.61               |
| <b>Nucleus</b>                | 13C                                                     | <b>Number of Transients</b> | 128                  | <b>Original Points Count</b> | 12076                |
| <b>Pulse Sequence</b>         | zgpg30                                                  | <b>Solvent</b>              | CHLOROFORM-D         | <b>Points Count</b>          | 65536                |
| <b>Temperature (degree C)</b> | 27.000                                                  |                             |                      | <b>Sweep Width (Hz)</b>      | 24154.59             |

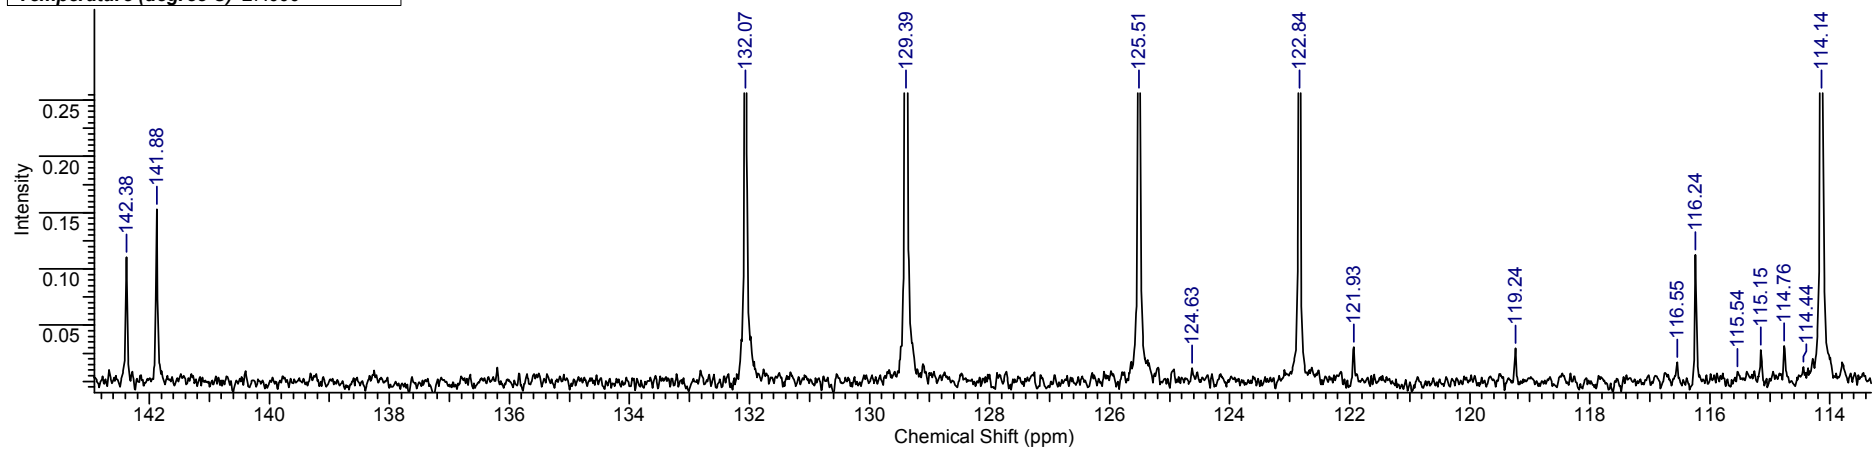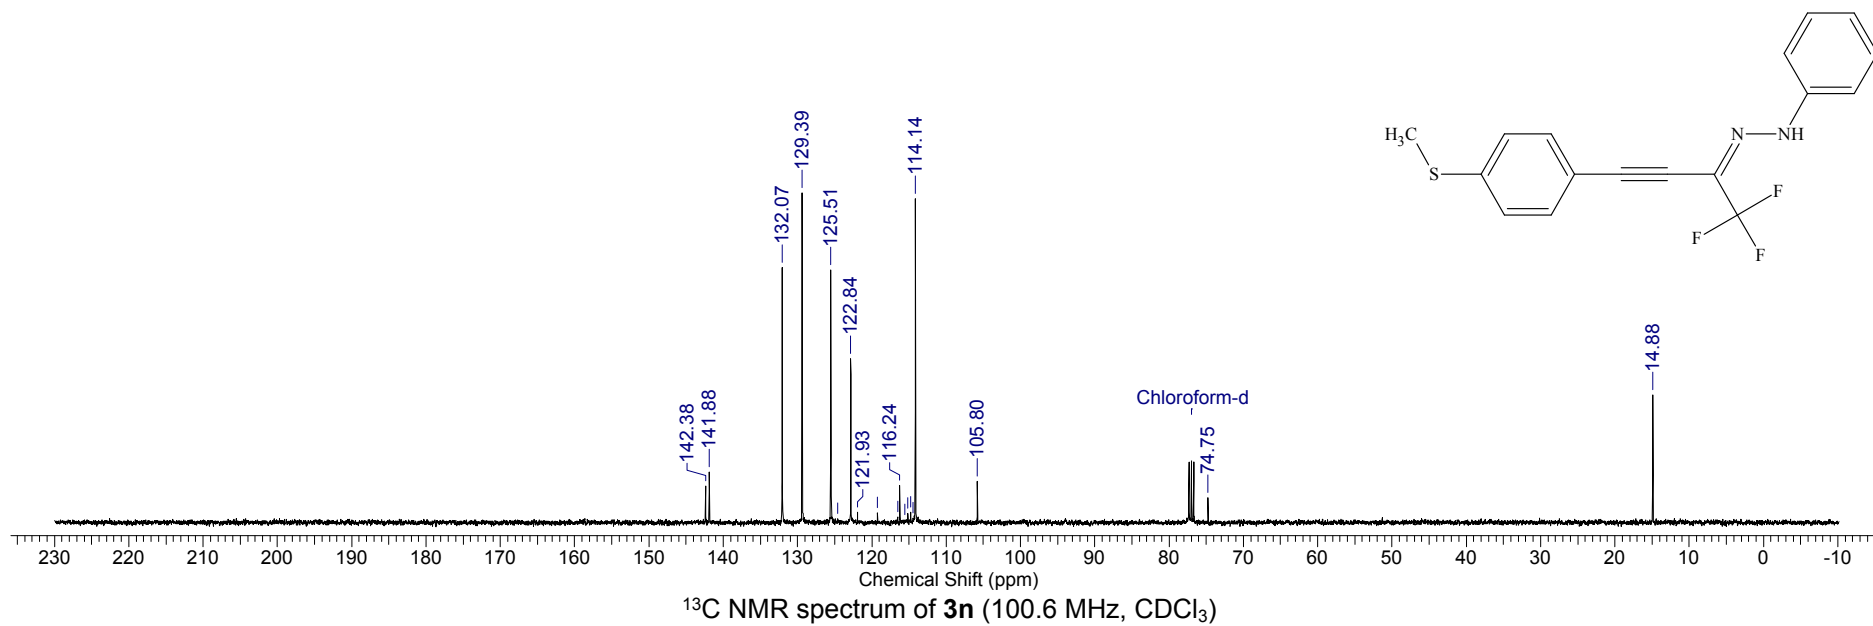

|           |          |                |                                                                 |
|-----------|----------|----------------|-----------------------------------------------------------------|
| <b>FW</b> | 334.3598 | <b>Formula</b> | C <sub>17</sub> H <sub>13</sub> F <sub>3</sub> N <sub>2</sub> S |
|-----------|----------|----------------|-----------------------------------------------------------------|

|                               |                                                                   |                             |                              |                              |             |                               |        |
|-------------------------------|-------------------------------------------------------------------|-----------------------------|------------------------------|------------------------------|-------------|-------------------------------|--------|
| <b>Acquisition Time (sec)</b> | 1.0000                                                            | <b>Comment</b>              | STANDARD FLUORINE PARAMETERS | <b>Date</b>                  | Apr 28 2017 |                               |        |
| <b>File Name</b>              | C:\BM_DATA\DOCS\SPEC_F_I-XII.2017\BM-1050_20170428_01\FLUORINE_01 |                             |                              | <b>Frequency (MHz)</b>       | 376.31      |                               |        |
| <b>Nucleus</b>                | 19F                                                               | <b>Number of Transients</b> | 16                           | <b>Original Points Count</b> | 89286       | <b>Points Count</b>           | 131072 |
| <b>Pulse Sequence</b>         | s2pul                                                             | <b>Solvent</b>              | CHLOROFORM-D                 | <b>Sweep Width (Hz)</b>      | 89285.71    | <b>Temperature (degree C)</b> | 25.000 |

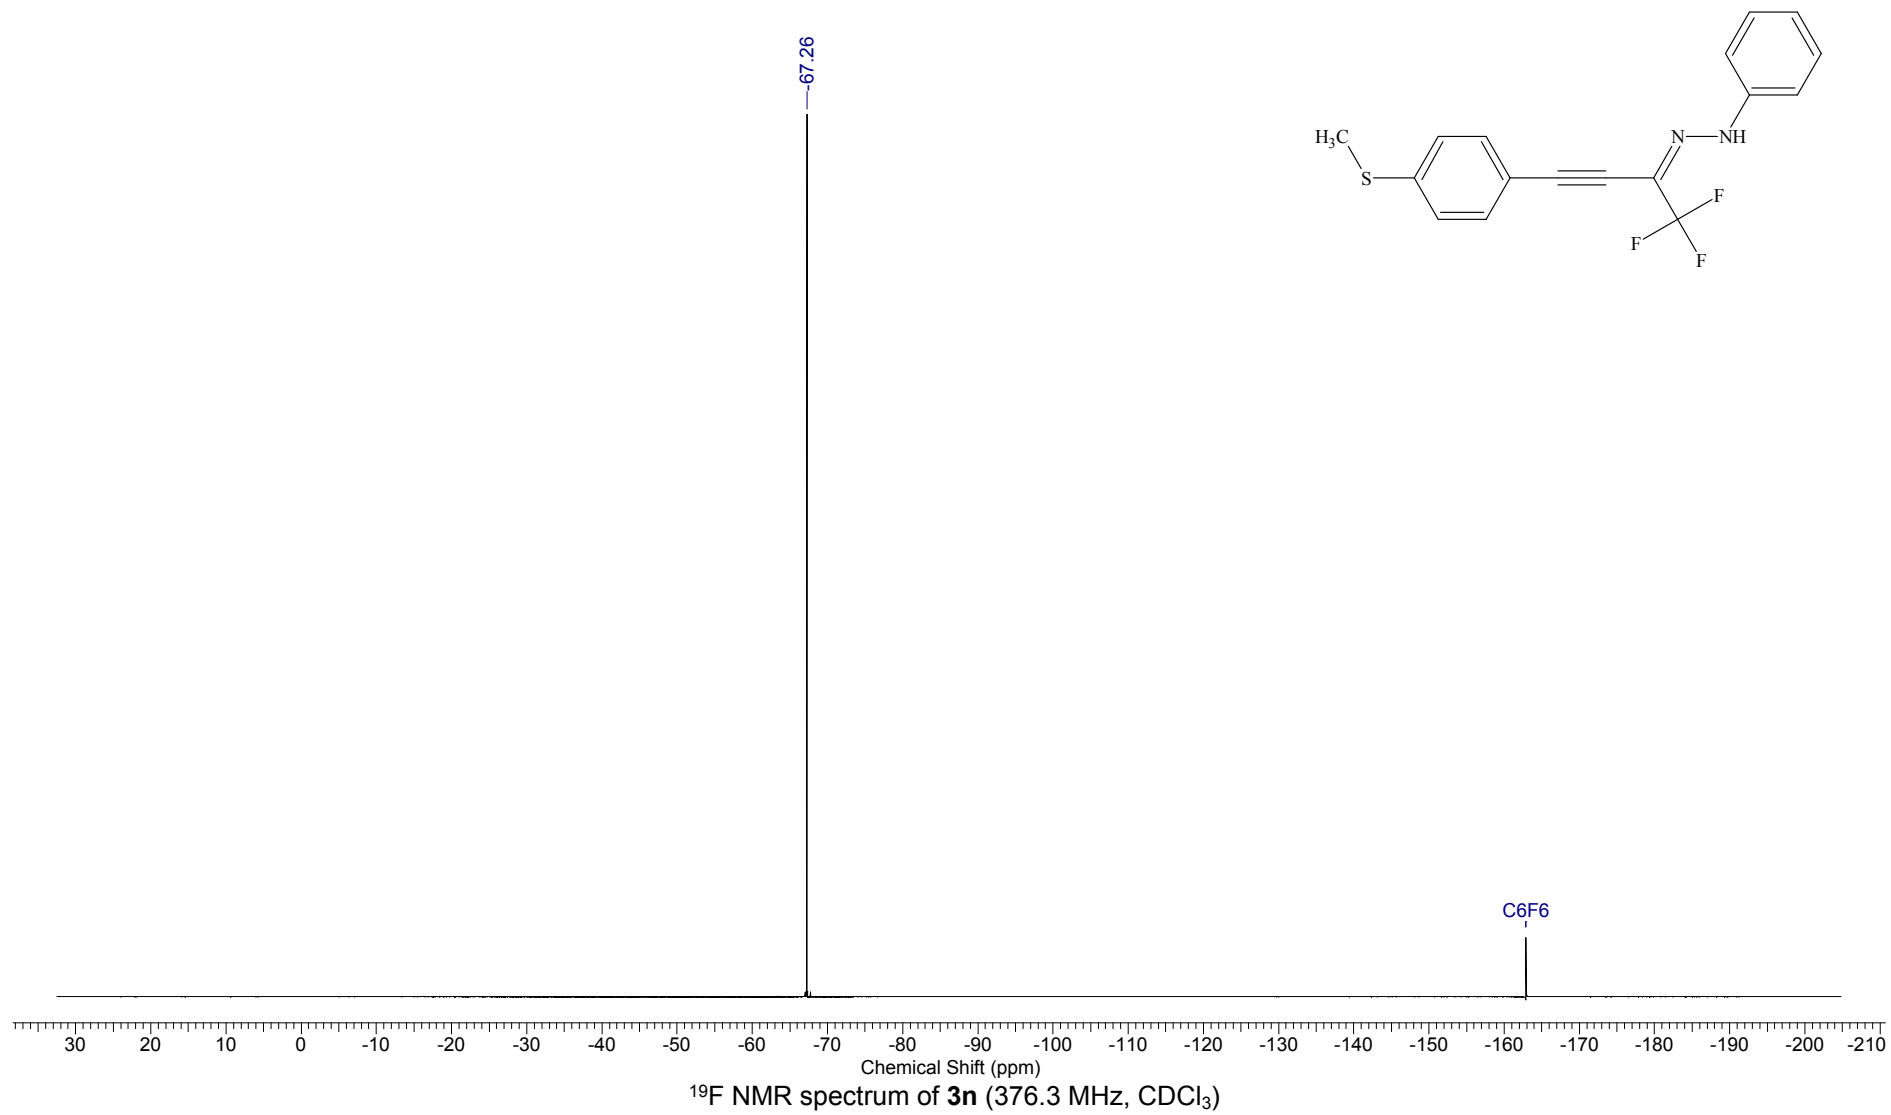

FW 368.3519 Formula C<sub>21</sub>H<sub>18</sub>F<sub>3</sub>N<sub>2</sub>O

|                        |                                                           |                      |                      |                       |                      |
|------------------------|-----------------------------------------------------------|----------------------|----------------------|-----------------------|----------------------|
| Acquisition Time (sec) | 2.5559                                                    | Comment              | Imported from UXMNR. | Date                  | 21 Mar 2017 14:26:58 |
| File Name              | C:\BM_DATA\DOCS\SPEC_BM_H,C_I-IV.2017\BM-976-2a.H_001001r |                      |                      | Frequency (MHz)       | 400.13               |
| Nucleus                | 1H                                                        | Number of Transients | 4                    | Original Points Count | 16384                |
| Pulse Sequence         | zg30                                                      | Solvent              | CHLOROFORM-D         | Points Count          | 65536                |
| Temperature (degree C) | 27.000                                                    |                      |                      | Sweep Width (Hz)      | 6410.26              |

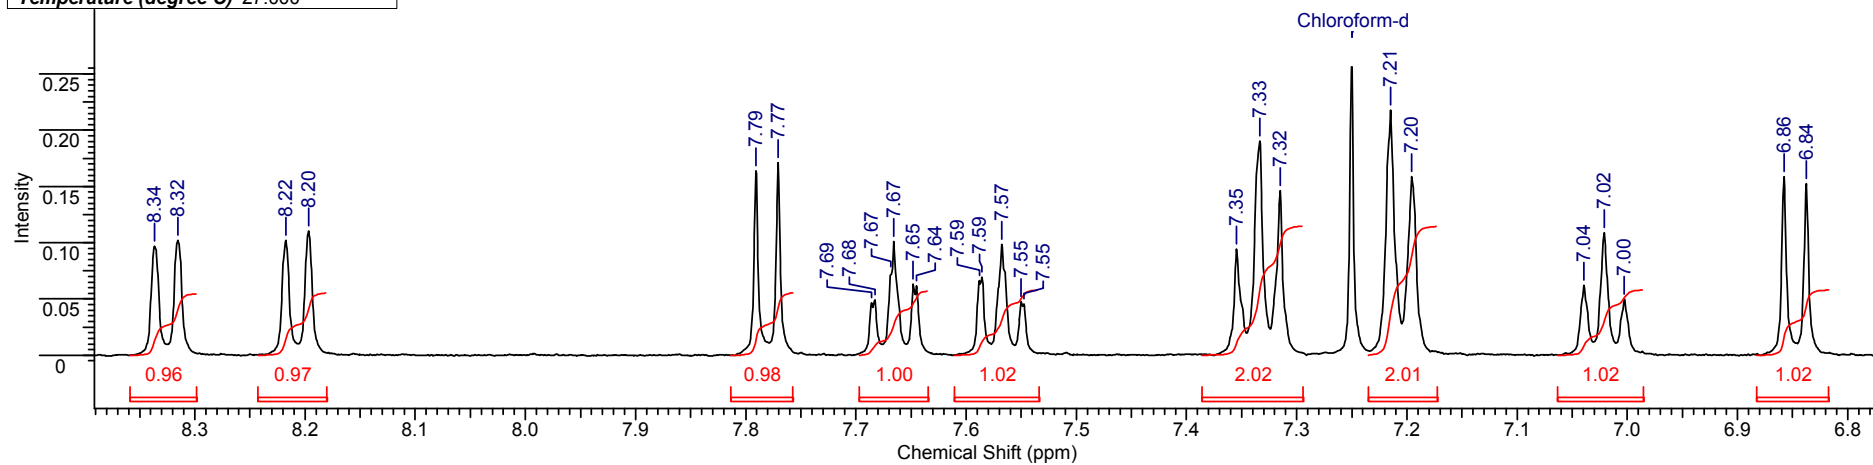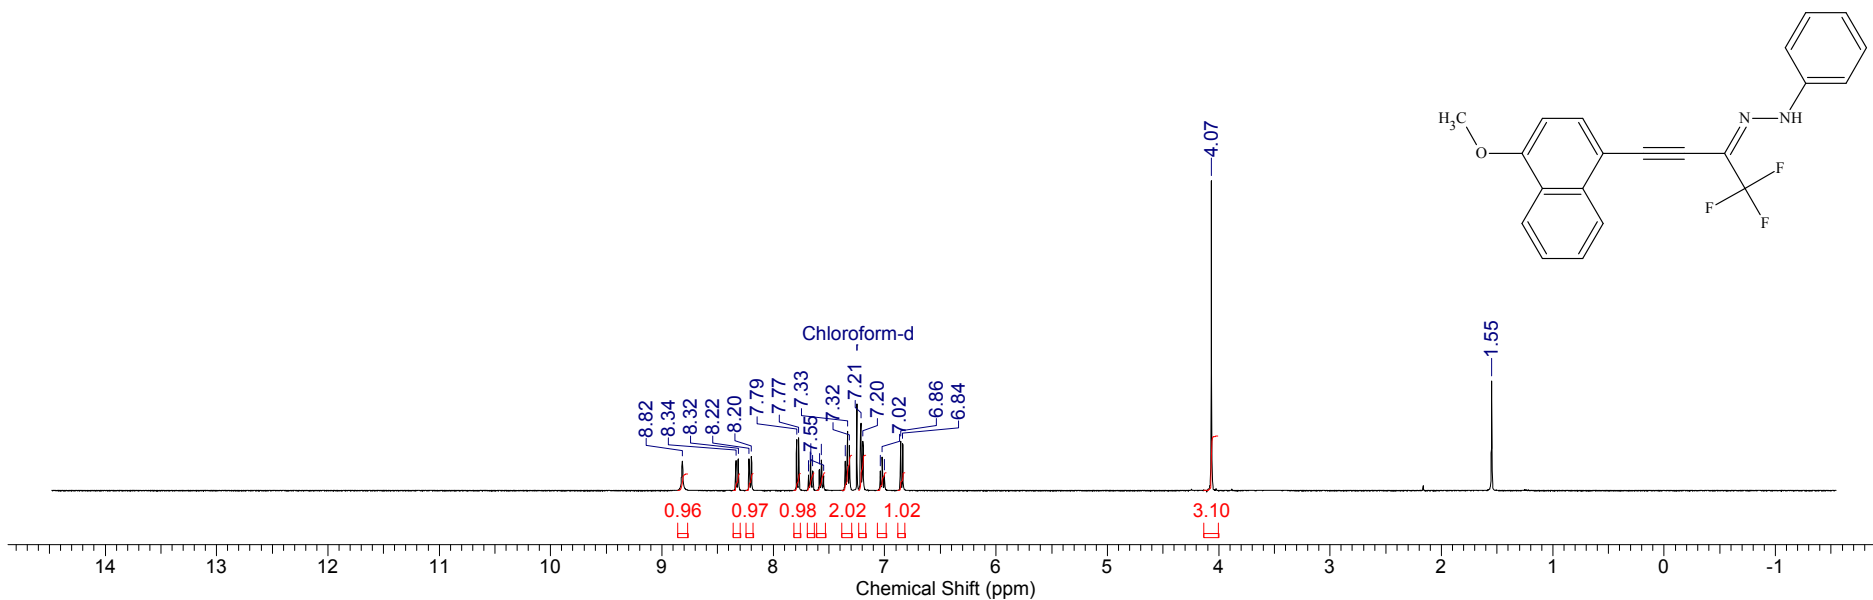

<sup>1</sup>H NMR spectrum of **3o** (400.1 MHz, CDCl<sub>3</sub>)

FW 368.3519 Formula C<sub>21</sub>H<sub>18</sub>F<sub>3</sub>N<sub>2</sub>O

|                        |                                                           |                      |                      |                       |                      |
|------------------------|-----------------------------------------------------------|----------------------|----------------------|-----------------------|----------------------|
| Acquisition Time (sec) | 0.4999                                                    | Comment              | Imported from UXMNR. | Date                  | 23 Mar 2017 12:00:54 |
| File Name              | C:\BM_DATA\DOCS\SPEC_BM_H,C_I-IV.2017\BM-976-2a.C_002001r |                      |                      | Frequency (MHz)       | 100.61               |
| Nucleus                | 13C                                                       | Number of Transients | 418                  | Original Points Count | 12076                |
| Pulse Sequence         | zgpg30                                                    | Solvent              | CHLOROFORM-D         | Points Count          | 65536                |
| Temperature (degree C) | 27.000                                                    |                      |                      | Sweep Width (Hz)      | 24154.59             |

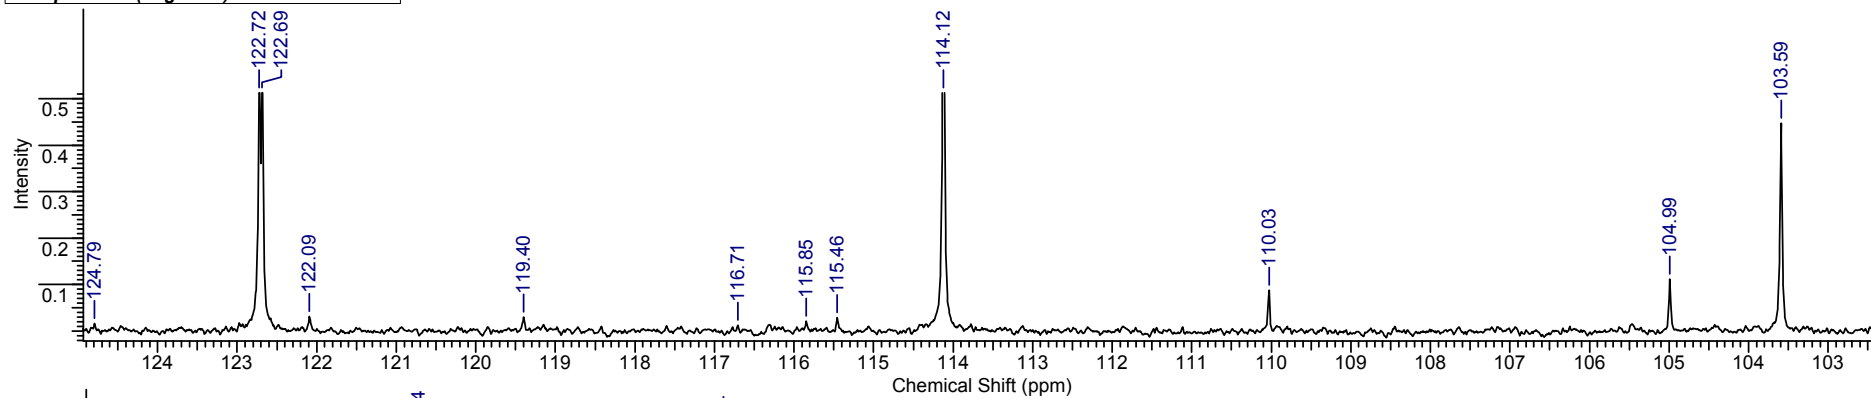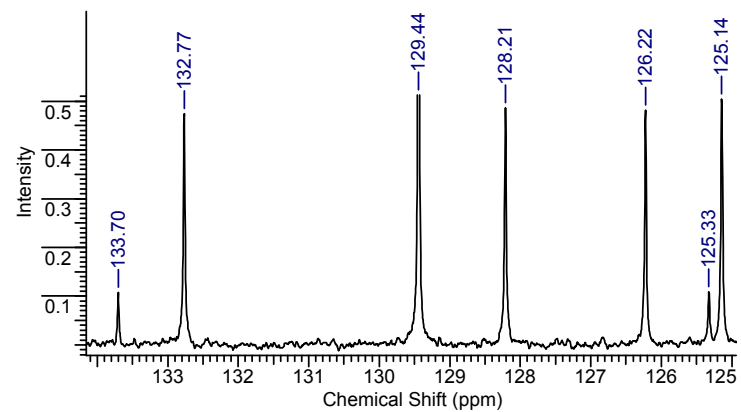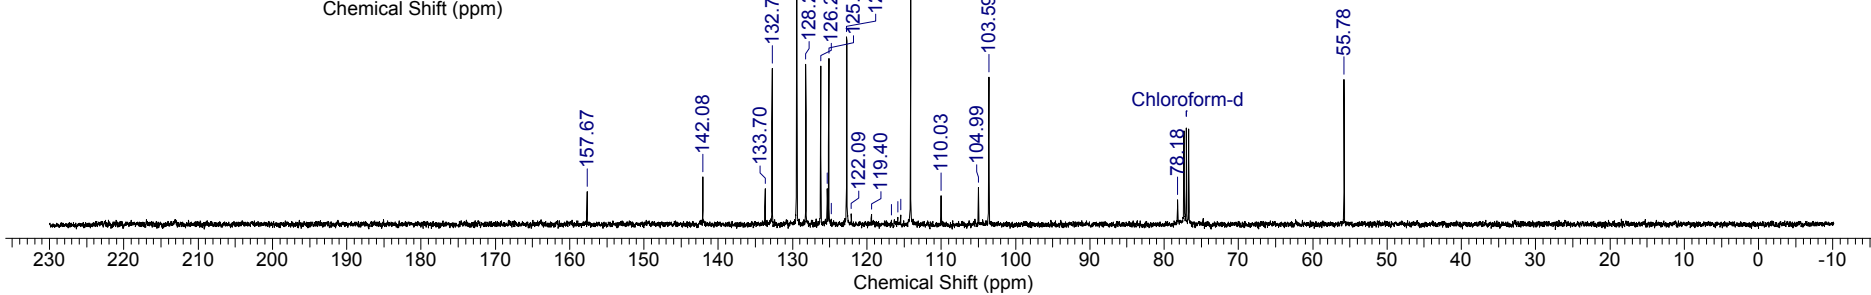

<sup>13</sup>C NMR spectrum of **3o** (100.6 MHz, CDCl<sub>3</sub>)

|           |          |                |                                                                 |
|-----------|----------|----------------|-----------------------------------------------------------------|
| <b>FW</b> | 368.3519 | <b>Formula</b> | C <sub>21</sub> H <sub>18</sub> F <sub>3</sub> N <sub>2</sub> O |
|-----------|----------|----------------|-----------------------------------------------------------------|

|                               |          |                               |                 |                             |                                                                     |                              |        |
|-------------------------------|----------|-------------------------------|-----------------|-----------------------------|---------------------------------------------------------------------|------------------------------|--------|
| <b>Acquisition Time (sec)</b> | 1.5000   | <b>Date</b>                   | Mar 20 2017     | <b>File Name</b>            | C:\BM_DATA\DOCS\SPEC_F_I-XII.2017\BM-976-2a_20170320_01\FLUORINE_01 |                              |        |
| <b>Frequency (MHz)</b>        | 376.31   | <b>Nucleus</b>                | <sup>19</sup> F | <b>Number of Transients</b> | 16                                                                  | <b>Original Points Count</b> | 133929 |
| <b>Points Count</b>           | 262144   | <b>Pulse Sequence</b>         | s2pul           | <b>Solvent</b>              | CHLOROFORM-D                                                        |                              |        |
| <b>Sweep Width (Hz)</b>       | 89285.71 | <b>Temperature (degree C)</b> | 25.000          |                             |                                                                     |                              |        |

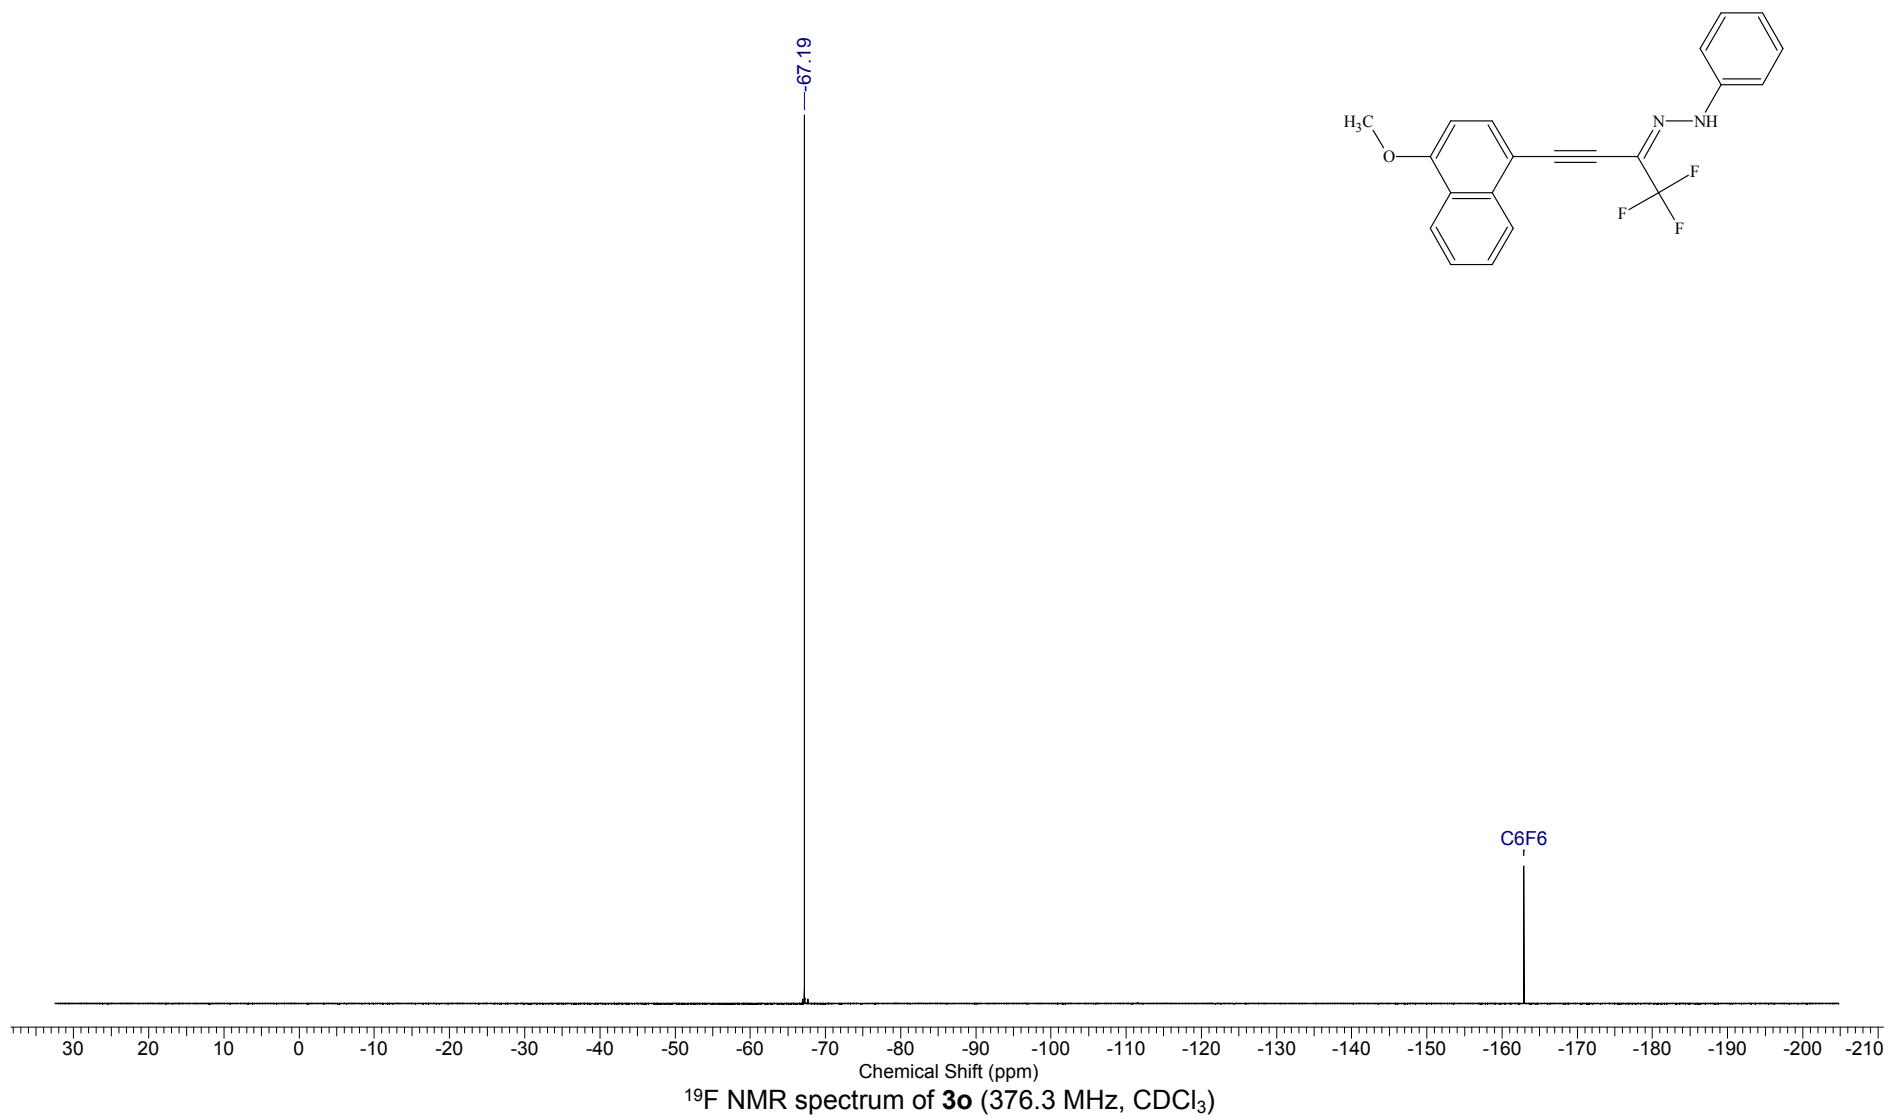



FW 423.4530 Formula C<sub>20</sub>H<sub>20</sub>F<sub>3</sub>N<sub>3</sub>O<sub>2</sub>S

|                        |                                                      |                       |                      |                        |                      |
|------------------------|------------------------------------------------------|-----------------------|----------------------|------------------------|----------------------|
| Acquisition Time (sec) | 2.5559                                               | Comment               | Imported from UXNMR. | Date                   | 29 Mar 2014 12:42:44 |
| File Name              | D:\BN\Docs (BN)\vasiliy\SPEC_BM_H.C\BM-448.H_001001r | Frequency (MHz)       | 400.13               | Nucleus                | <sup>1</sup> H       |
| Number of Transients   | 4                                                    | Original Points Count | 16384                | Points Count           | 65536                |
| Solvent                | CHLOROFORM-D                                         | Sweep Width (Hz)      | 6410.26              | Pulse Sequence         | zg30                 |
|                        |                                                      |                       |                      | Temperature (degree C) | 27.000               |

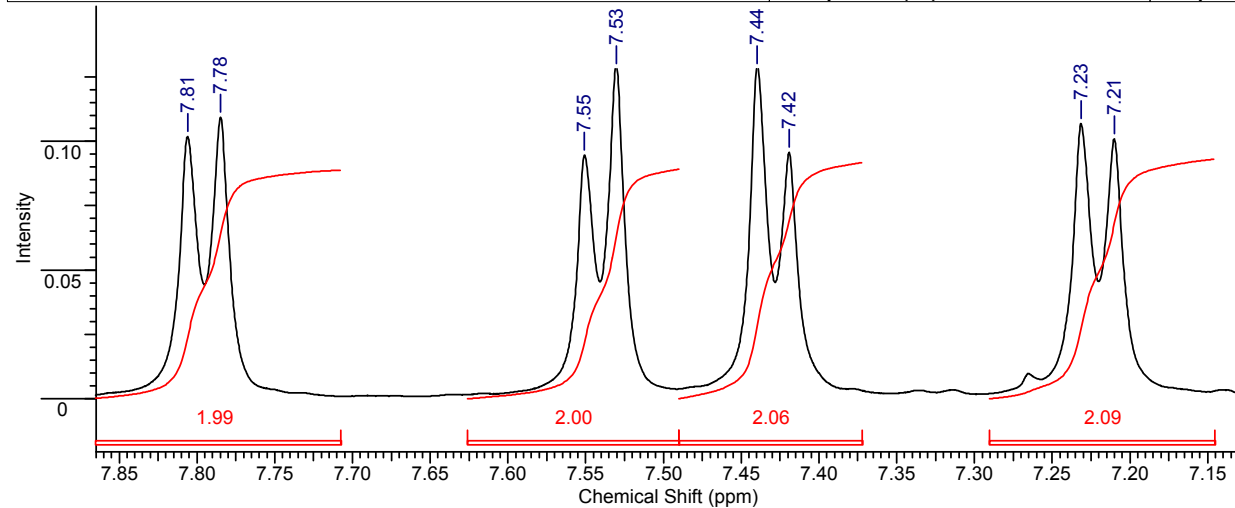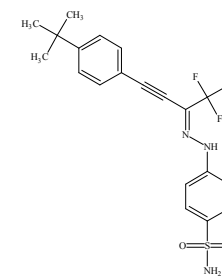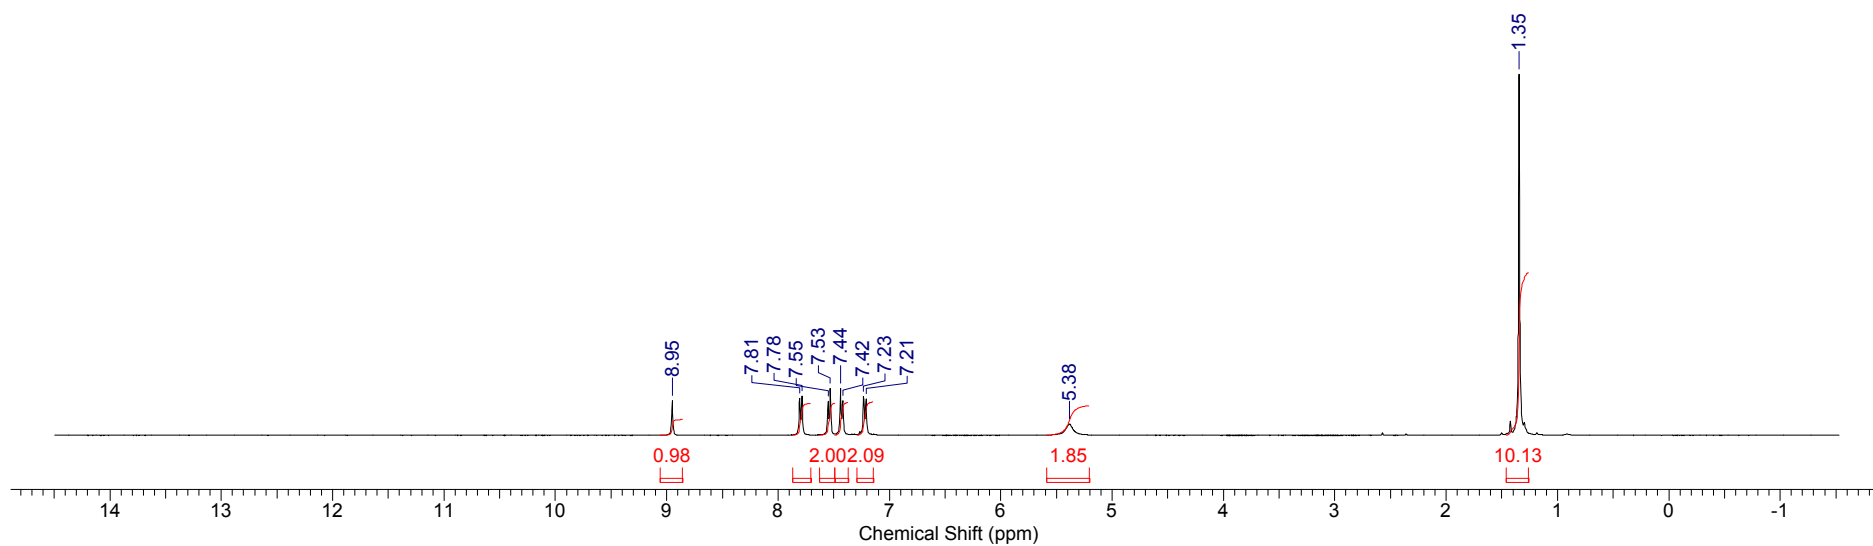

<sup>1</sup>H NMR spectrum of **3p** (400.1 MHz, CDCl<sub>3</sub>)

|           |          |                |                                                                                |
|-----------|----------|----------------|--------------------------------------------------------------------------------|
| <b>FW</b> | 423.4530 | <b>Formula</b> | C <sub>20</sub> H <sub>20</sub> F <sub>3</sub> N <sub>3</sub> O <sub>2</sub> S |
|-----------|----------|----------------|--------------------------------------------------------------------------------|

|                               |                                                      |                              |                         |                     |                               |                       |        |
|-------------------------------|------------------------------------------------------|------------------------------|-------------------------|---------------------|-------------------------------|-----------------------|--------|
| <b>Acquisition Time (sec)</b> | 0.4999                                               | <b>Comment</b>               | Imported from UXMNR.    |                     | <b>Date</b>                   | 29 Mar 2014 12:46:48  |        |
| <b>File Name</b>              | D:\BN\Docs (BN)\vasiliy\SPEC_BM_H.C\BM-448.C_002001r |                              | <b>Frequency (MHz)</b>  | 100.61              | <b>Nucleus</b>                | 13C                   |        |
| <b>Number of Transients</b>   | 80                                                   | <b>Original Points Count</b> | 12076                   | <b>Points Count</b> | 65536                         | <b>Pulse Sequence</b> | zgpg30 |
| <b>Solvent</b>                | CHLOROFORM-D                                         |                              | <b>Sweep Width (Hz)</b> | 24154.59            | <b>Temperature (degree C)</b> | 27.000                |        |

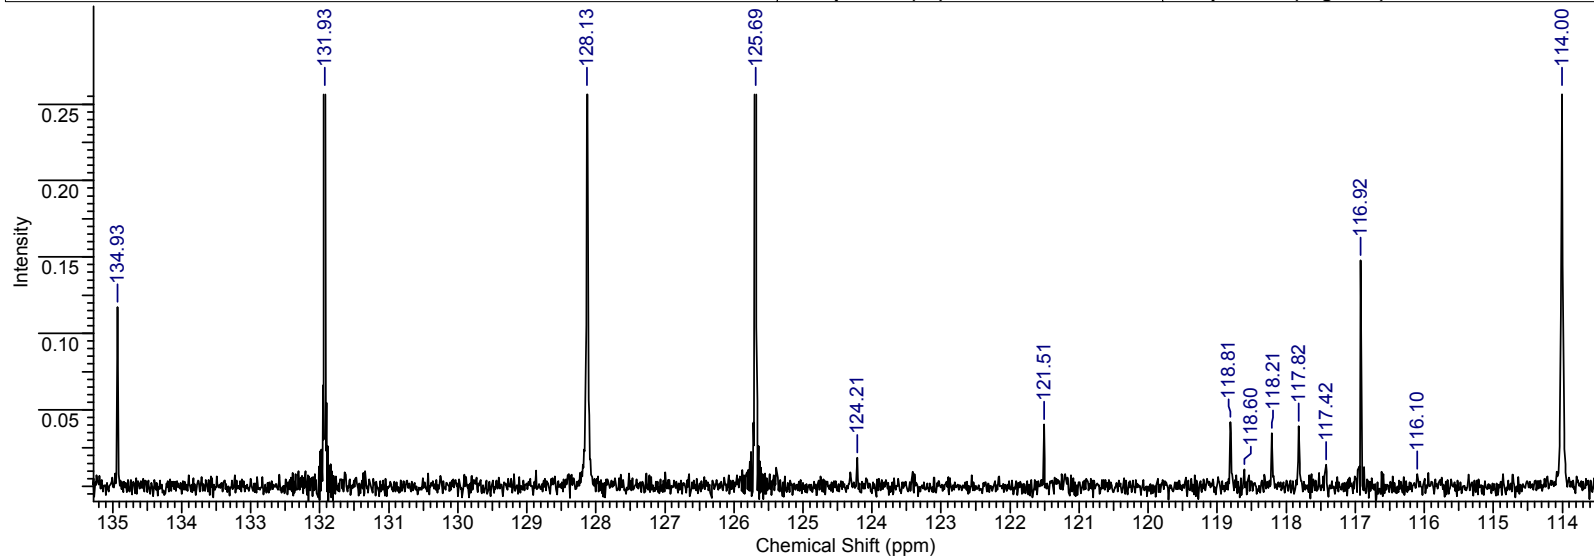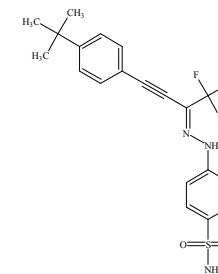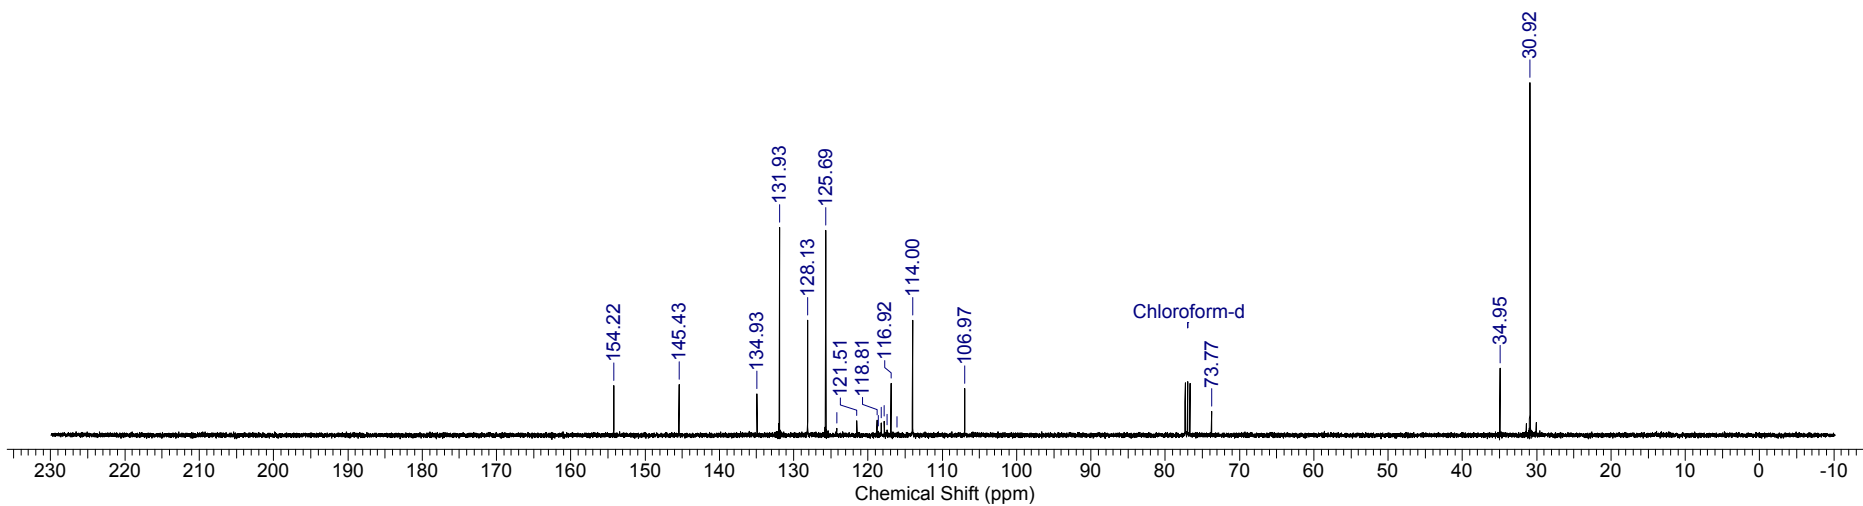

<sup>13</sup>C NMR spectrum of **3p** (100.6 MHz, CDCl<sub>3</sub>)

|           |          |                |                                                                                |
|-----------|----------|----------------|--------------------------------------------------------------------------------|
| <b>FW</b> | 423.4530 | <b>Formula</b> | C <sub>20</sub> H <sub>20</sub> F <sub>3</sub> N <sub>3</sub> O <sub>2</sub> S |
|-----------|----------|----------------|--------------------------------------------------------------------------------|

|                               |          |                               |             |                             |                                                                  |                              |       |
|-------------------------------|----------|-------------------------------|-------------|-----------------------------|------------------------------------------------------------------|------------------------------|-------|
| <b>Acquisition Time (sec)</b> | 1.0000   | <b>Date</b>                   | Feb 28 2014 | <b>File Name</b>            | D:\BN\Docs (BN)\vasiliy\SPEC_BM_F\BM-448_20140228_01\FLUORINE_01 |                              |       |
| <b>Frequency (MHz)</b>        | 376.31   | <b>Nucleus</b>                | 19F         | <b>Number of Transients</b> | 8                                                                | <b>Original Points Count</b> | 89286 |
| <b>Points Count</b>           | 131072   | <b>Pulse Sequence</b>         | s2pul       | <b>Solvent</b>              | CHLOROFORM-D                                                     |                              |       |
| <b>Sweep Width (Hz)</b>       | 89285.71 | <b>Temperature (degree C)</b> | 28.000      |                             |                                                                  |                              |       |

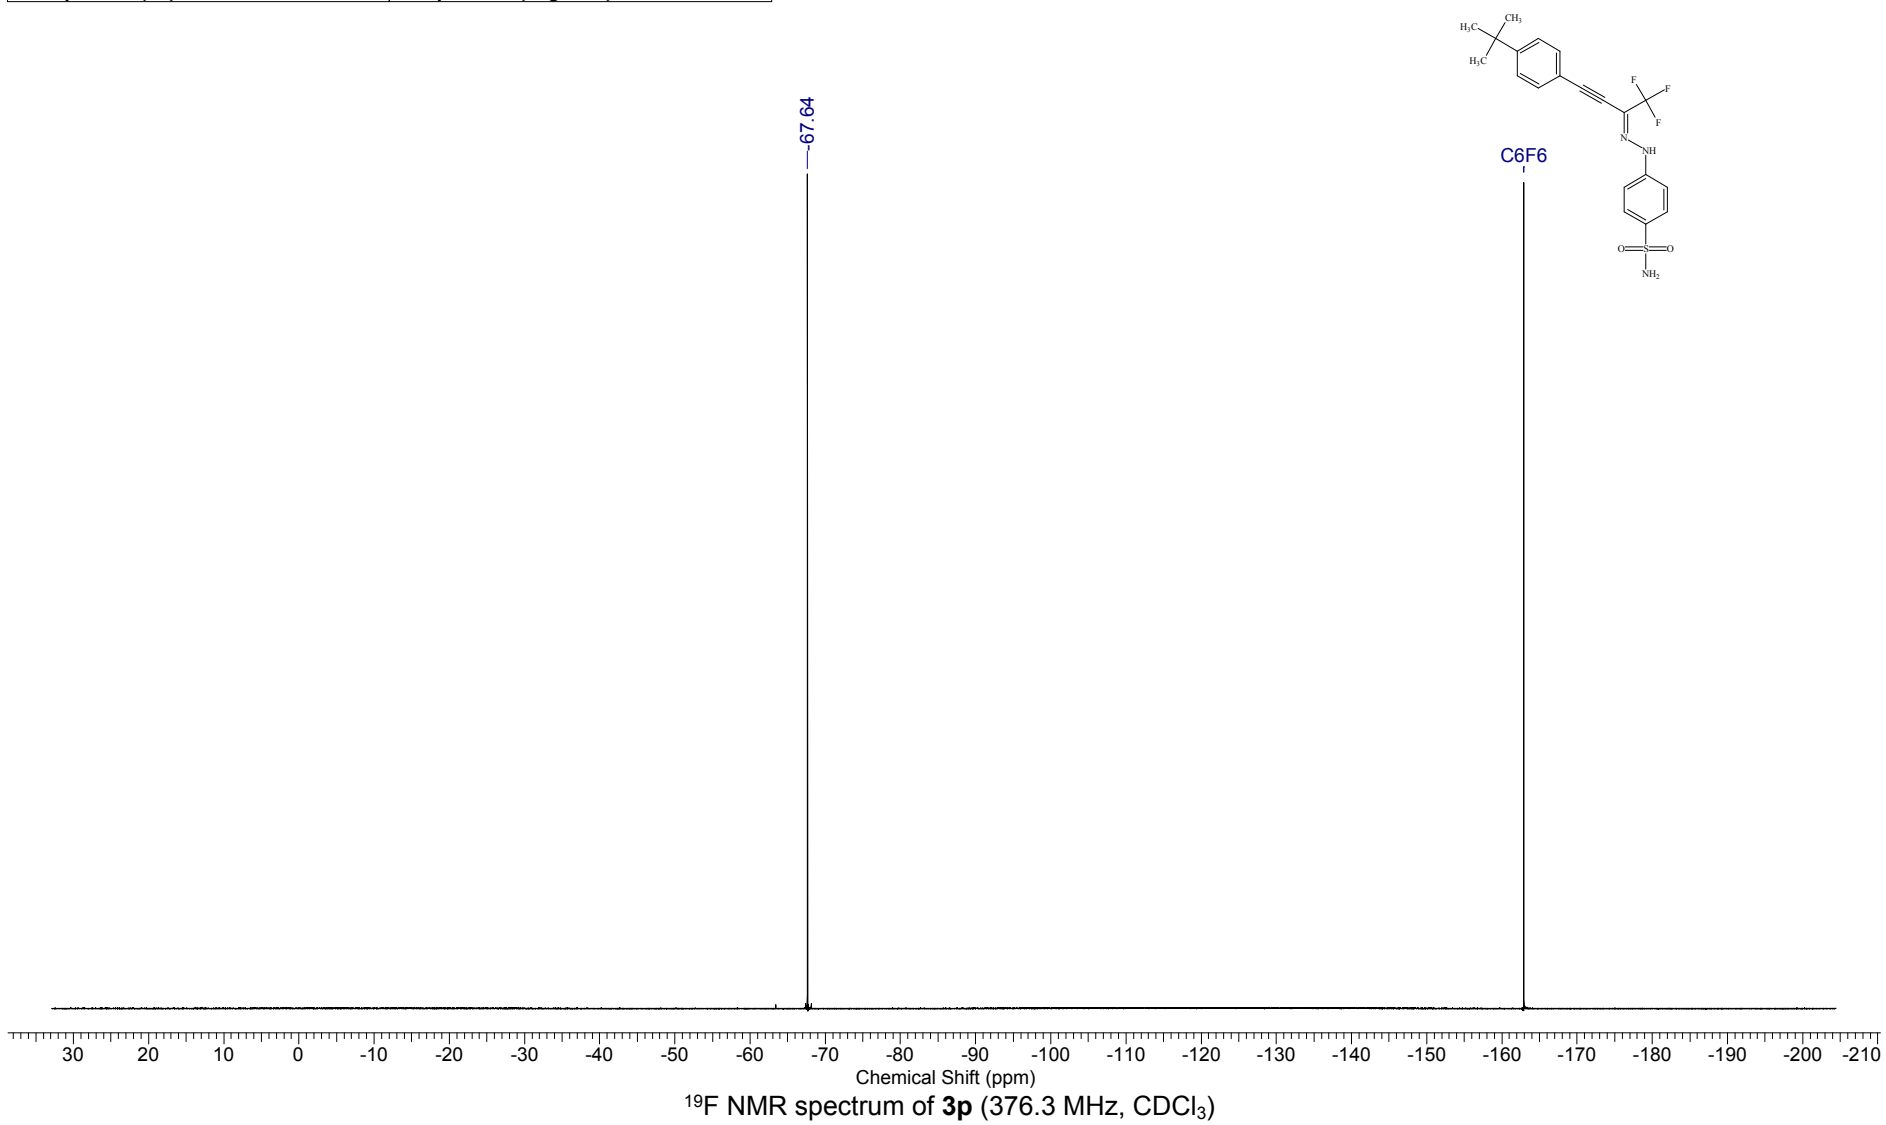

FW 381.3733 Formula C<sub>17</sub>H<sub>14</sub>F<sub>3</sub>N<sub>3</sub>O<sub>2</sub>S

|                        |                                    |                  |                      |                |      |                      |         |
|------------------------|------------------------------------|------------------|----------------------|----------------|------|----------------------|---------|
| Acquisition Time (sec) | 2.5559                             | Comment          | Imported from UXNMR. |                | Date | 03 Jun 2014 13:45:42 |         |
| File Name              | C:\BM_DATA\SPEC_BMBM-496.H_001001r | Frequency (MHz)  | 400.13               | Nucleus        | 1H   | Number of Transients | 8       |
| Original Points Count  | 16384                              | Points Count     | 65536                | Pulse Sequence | zg30 | Solvent              | DMSO-D6 |
| Temperature (degree C) | 27.000                             | Sweep Width (Hz) | 6410.26              |                |      |                      |         |

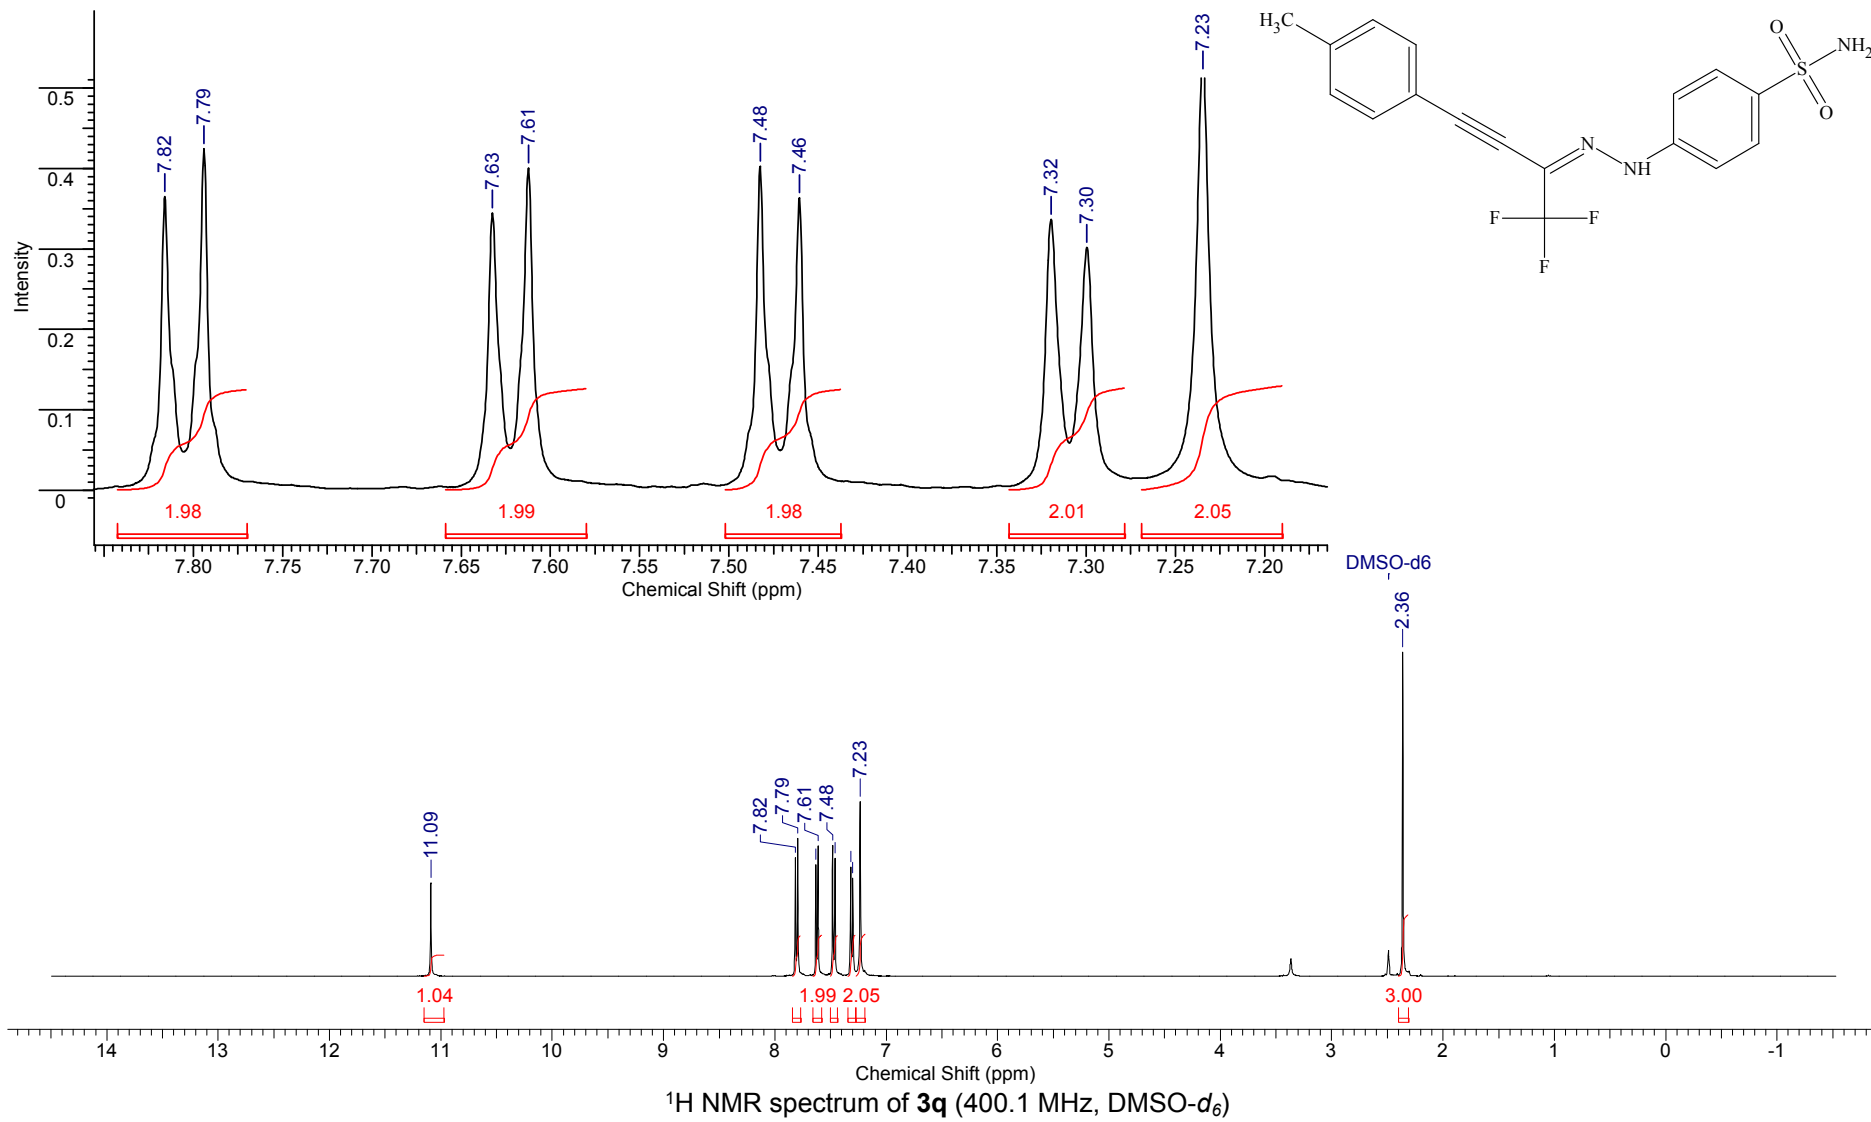

|           |          |                |                                                                                |
|-----------|----------|----------------|--------------------------------------------------------------------------------|
| <b>FW</b> | 381.3733 | <b>Formula</b> | C <sub>17</sub> H <sub>14</sub> F <sub>3</sub> N <sub>3</sub> O <sub>2</sub> S |
|-----------|----------|----------------|--------------------------------------------------------------------------------|

|                               |        |                       |            |                             |                                                                  |                              |          |
|-------------------------------|--------|-----------------------|------------|-----------------------------|------------------------------------------------------------------|------------------------------|----------|
| <b>Acquisition Time (sec)</b> | 1.0000 | <b>Date</b>           | Jun 3 2014 | <b>File Name</b>            | C:\BM_DATA\SPECTRA\19F\2014.06.03\bm-496_20140603_01\FLUORINE_01 |                              |          |
| <b>Frequency (MHz)</b>        | 376.31 | <b>Nucleus</b>        | 19F        | <b>Number of Transients</b> | 32                                                               | <b>Original Points Count</b> | 89286    |
| <b>Points Count</b>           | 131072 | <b>Pulse Sequence</b> | s2pul      | <b>Solvent</b>              | DMSO-D6                                                          | <b>Sweep Width (Hz)</b>      | 89285.71 |
| <b>Temperature (degree C)</b> | 28.000 |                       |            |                             |                                                                  |                              |          |

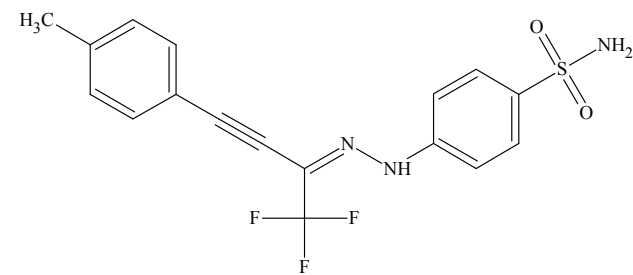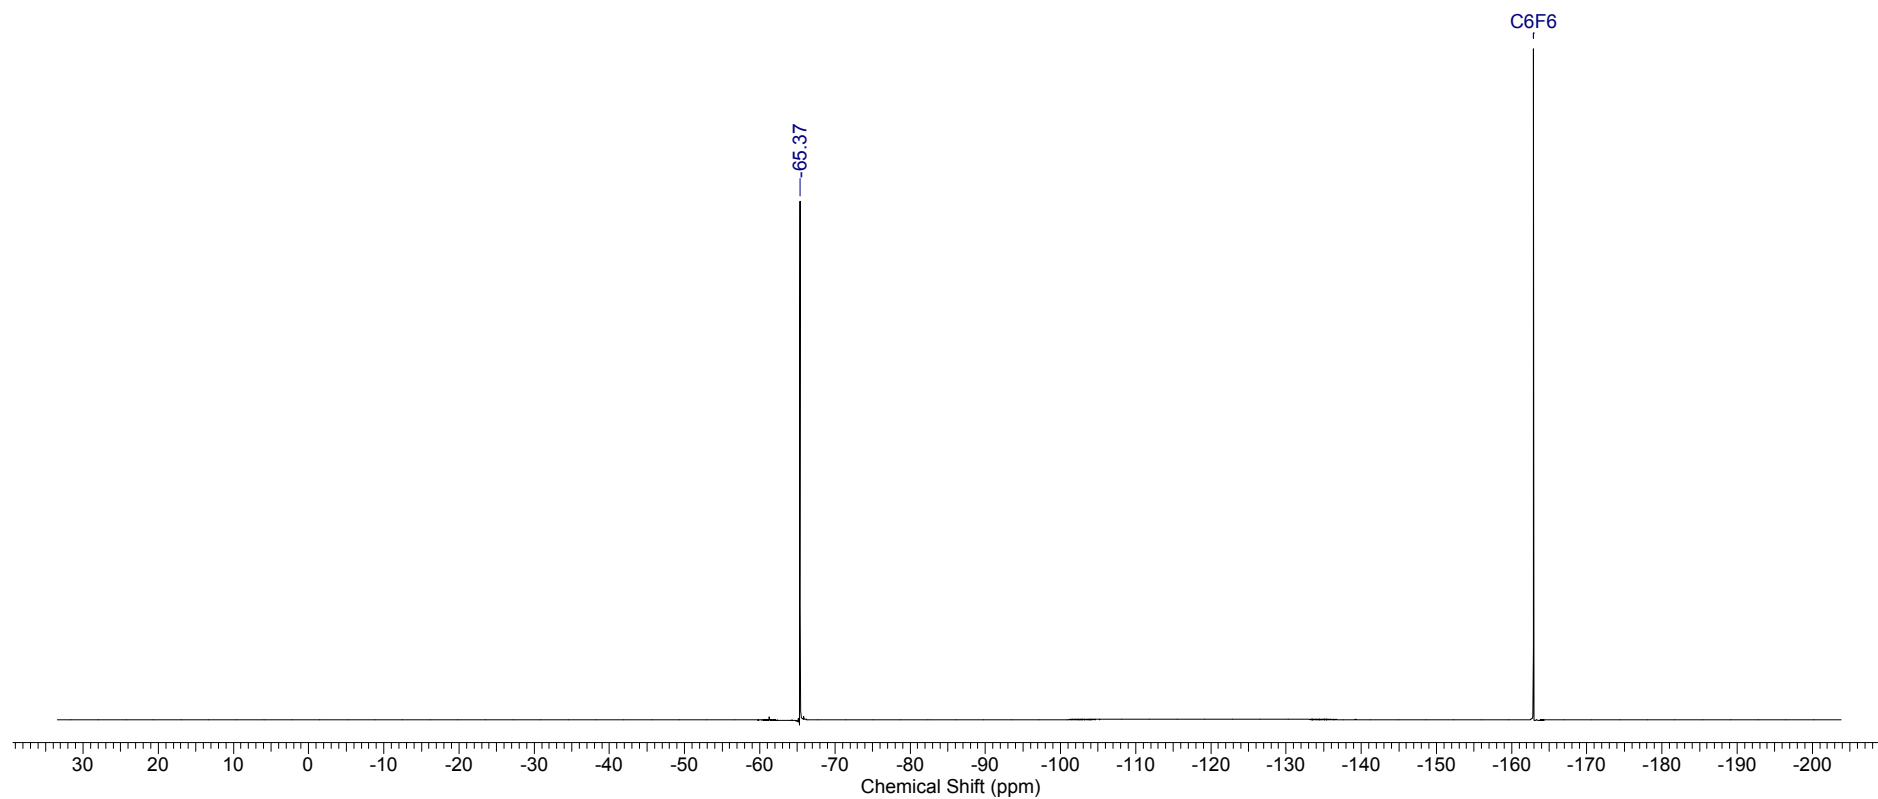

<sup>13</sup>C NMR spectrum of **3q** (100.6 MHz, DMSO-d<sub>6</sub>)

**FW** 381.3733 **Formula** C<sub>17</sub>H<sub>14</sub>F<sub>3</sub>N<sub>3</sub>O<sub>2</sub>S

|                               |                                    |                              |                      |                               |                      |
|-------------------------------|------------------------------------|------------------------------|----------------------|-------------------------------|----------------------|
| <b>Acquisition Time (sec)</b> | 0.4999                             | <b>Comment</b>               | Imported from UXNMR. | <b>Date</b>                   | 03 Jun 2014 13:50:50 |
| <b>File Name</b>              | C:\BM_DATA\SPEC_BMBM-496.C_002001r | <b>Frequency (MHz)</b>       | 100.61               | <b>Nucleus</b>                | 13C                  |
| <b>Number of Transients</b>   | 100                                | <b>Original Points Count</b> | 12076                | <b>Points Count</b>           | 65536                |
| <b>Solvent</b>                | DEUTERIUM OXIDE                    | <b>Sweep Width (Hz)</b>      | 24154.59             | <b>Pulse Sequence</b>         | zgpg30               |
|                               |                                    |                              |                      | <b>Temperature (degree C)</b> | 27.000               |

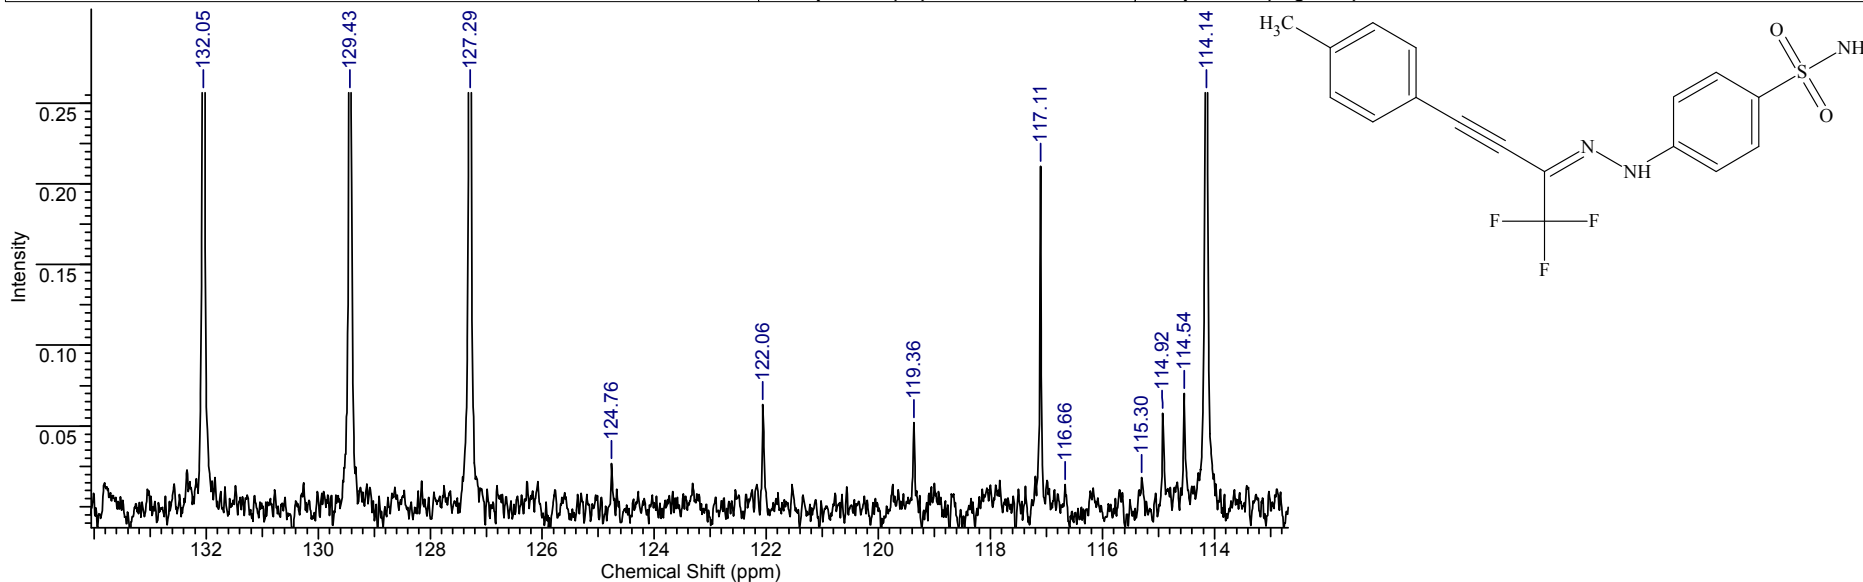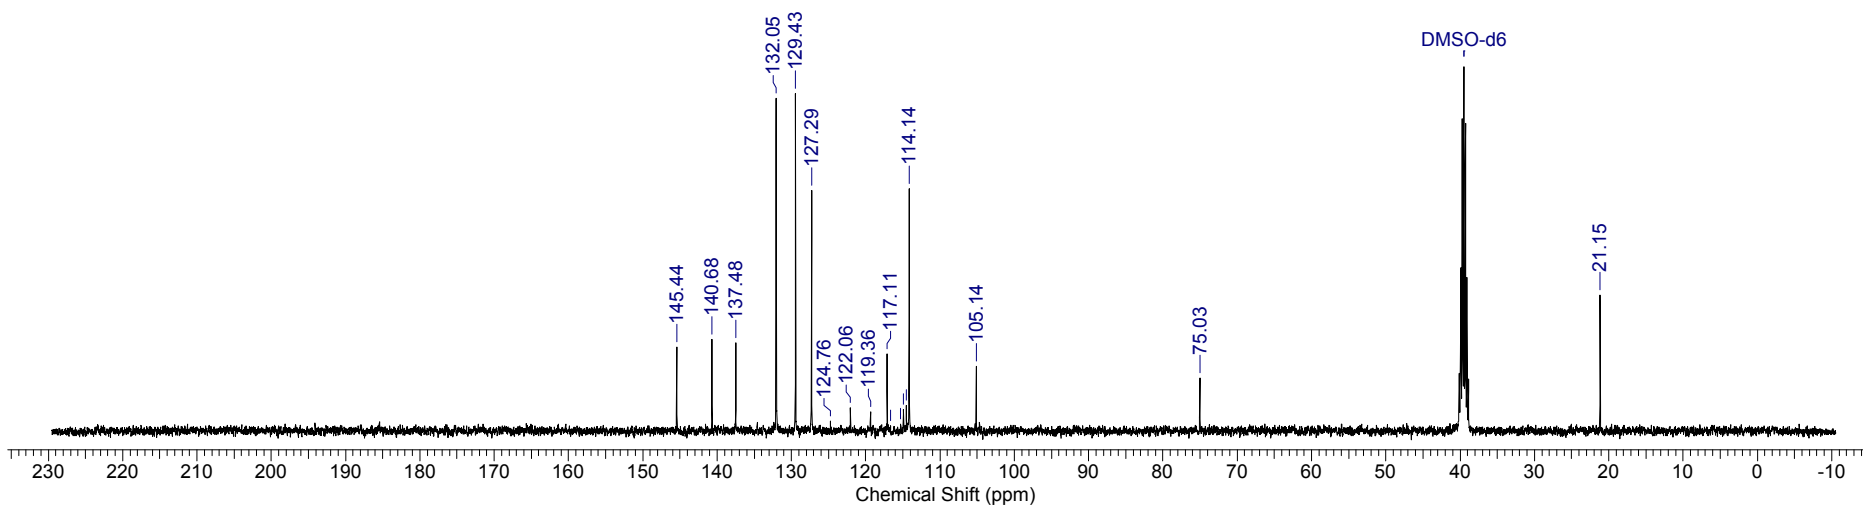

<sup>19</sup>F NMR spectrum of **3q** (376.3 MHz, DMSO-*d*<sub>6</sub>)

**FW** 352.7380 **Formula** C<sub>17</sub>H<sub>12</sub>ClF<sub>3</sub>N<sub>2</sub>O

|                               |                                                          |                             |                      |                              |                      |
|-------------------------------|----------------------------------------------------------|-----------------------------|----------------------|------------------------------|----------------------|
| <b>Acquisition Time (sec)</b> | 2.5559                                                   | <b>Comment</b>              | Imported from UXMNR. | <b>Date</b>                  | 26 Jul 2017 17:33:04 |
| <b>File Name</b>              | C:\BM_DATA\DOCS\SPEC_BM_H,C_V-XII.2017\BM-1138.H_001001r |                             |                      | <b>Frequency (MHz)</b>       | 400.13               |
| <b>Nucleus</b>                | 1H                                                       | <b>Number of Transients</b> | 4                    | <b>Original Points Count</b> | 16384                |
| <b>Pulse Sequence</b>         | zg30                                                     | <b>Solvent</b>              | CHLOROFORM-D         | <b>Points Count</b>          | 65536                |
| <b>Temperature (degree C)</b> | 27.000                                                   |                             |                      | <b>Sweep Width (Hz)</b>      | 6410.26              |

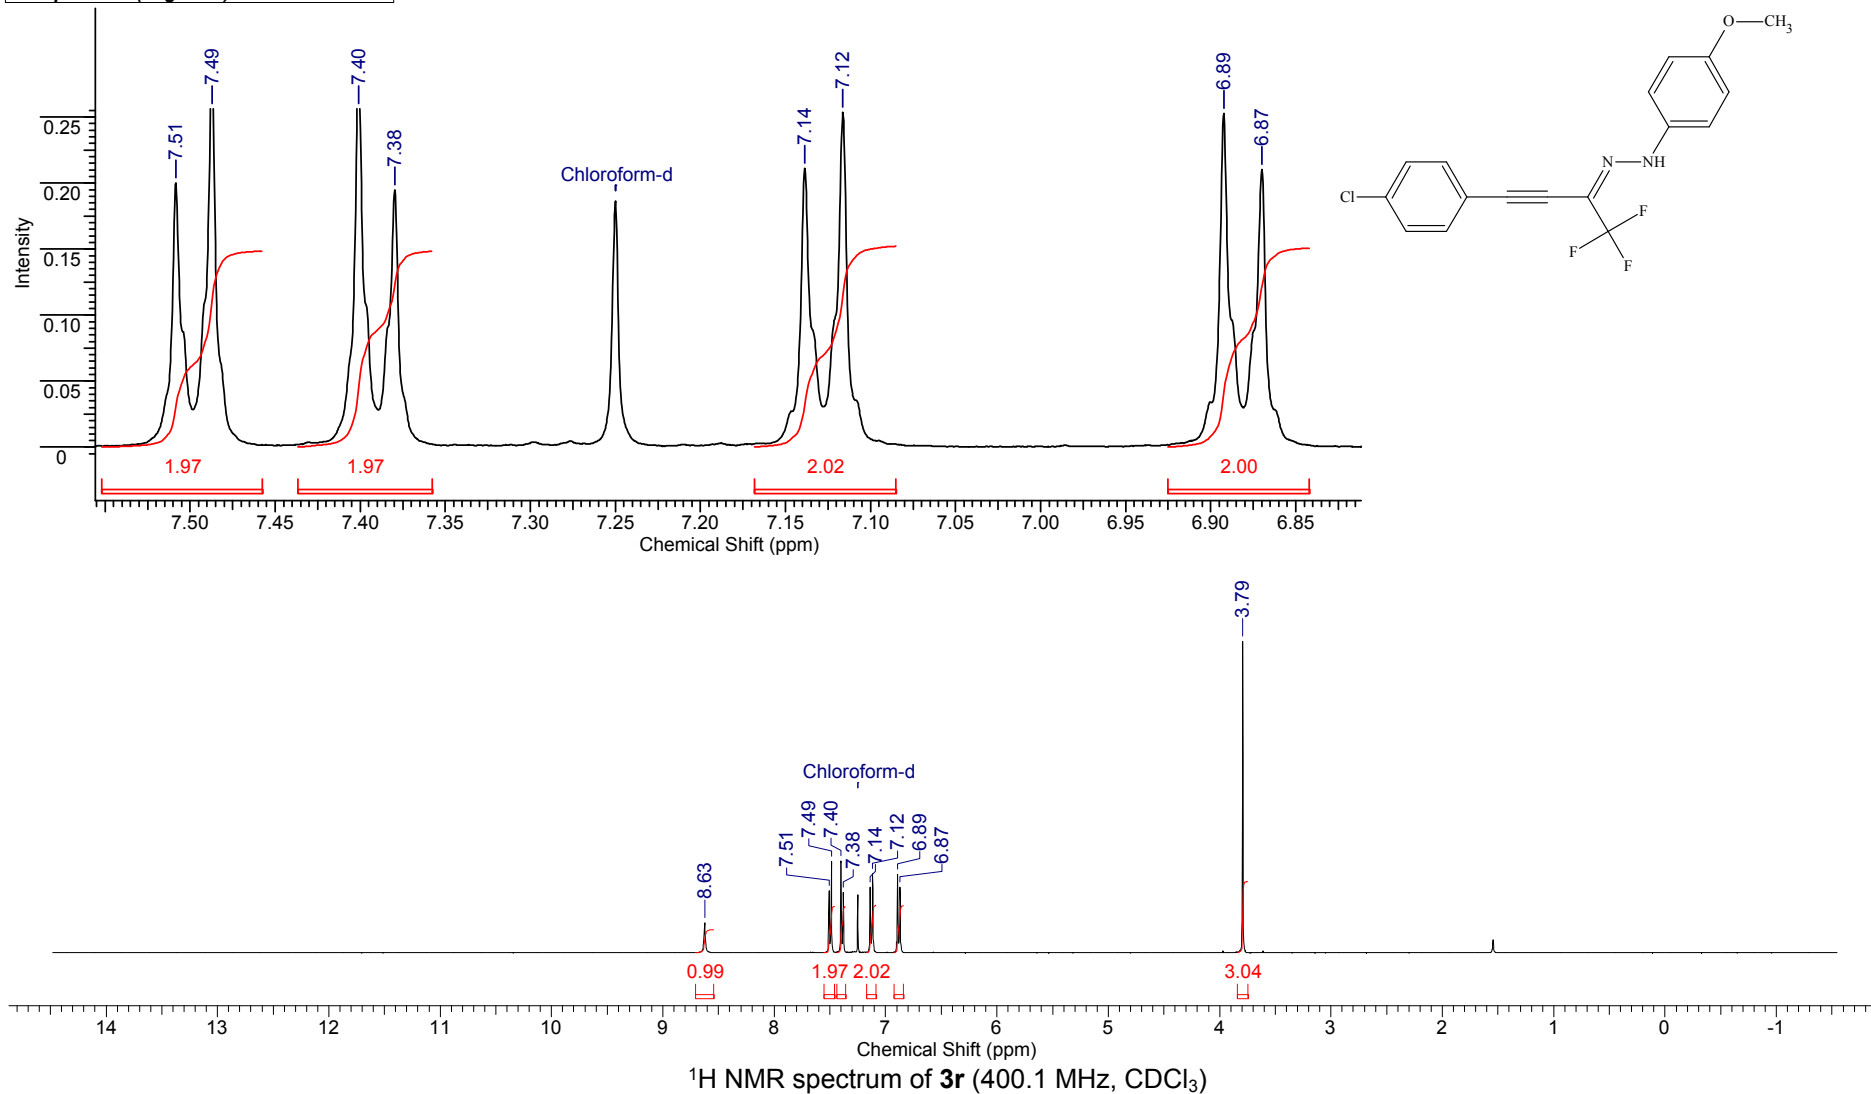

|           |          |                |                                                                   |
|-----------|----------|----------------|-------------------------------------------------------------------|
| <b>FW</b> | 352.7380 | <b>Formula</b> | C <sub>17</sub> H <sub>12</sub> ClF <sub>3</sub> N <sub>2</sub> O |
|-----------|----------|----------------|-------------------------------------------------------------------|

|                               |                                                           |                             |                      |                              |                      |
|-------------------------------|-----------------------------------------------------------|-----------------------------|----------------------|------------------------------|----------------------|
| <b>Acquisition Time (sec)</b> | 0.4999                                                    | <b>Comment</b>              | Imported from UXMNR. | <b>Date</b>                  | 26 Jul 2017 17:52:32 |
| <b>File Name</b>              | C:\IBM_DATA\DOCS\SPEC_BM_H,C_V-XII.2017\BM-1138.C_002001r |                             |                      | <b>Frequency (MHz)</b>       | 100.61               |
| <b>Nucleus</b>                | 13C                                                       | <b>Number of Transients</b> | 177                  | <b>Original Points Count</b> | 12076                |
| <b>Pulse Sequence</b>         | zgpg30                                                    | <b>Solvent</b>              | CHLOROFORM-D         | <b>Points Count</b>          | 65536                |
| <b>Temperature (degree C)</b> | 27.000                                                    |                             |                      | <b>Sweep Width (Hz)</b>      | 24154.59             |

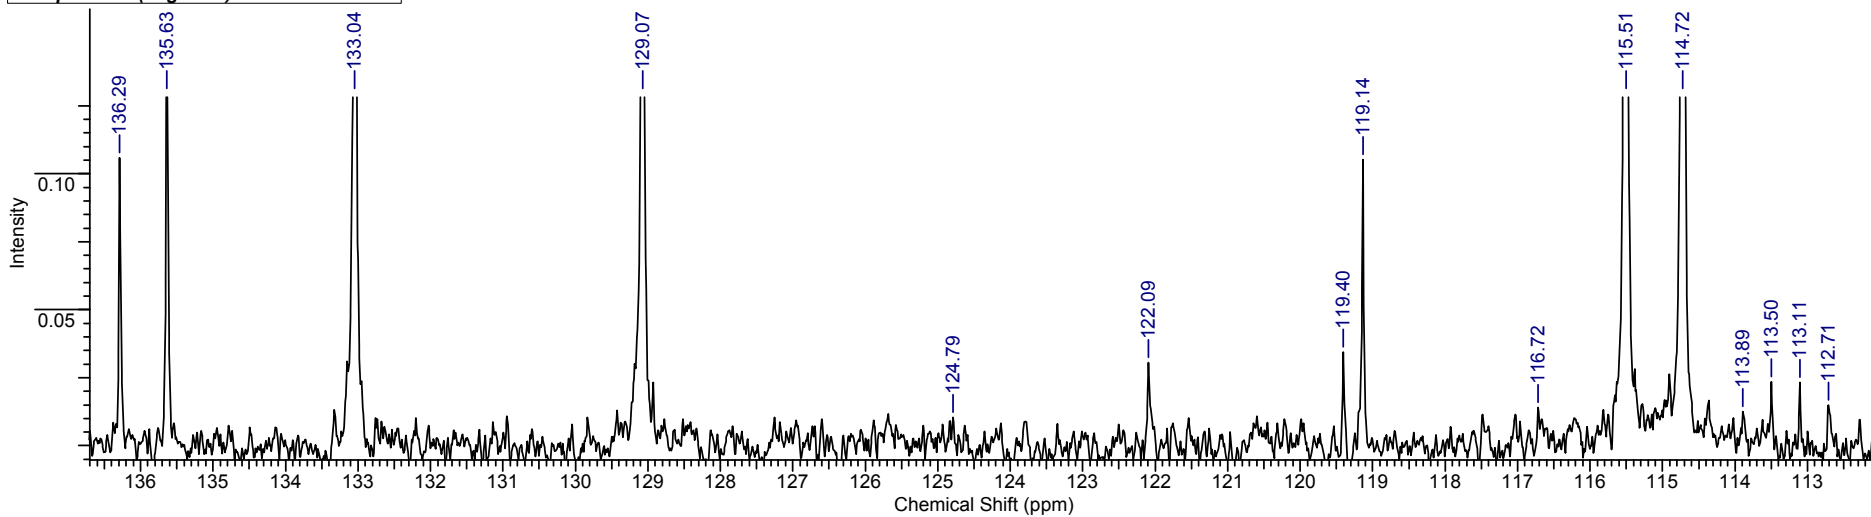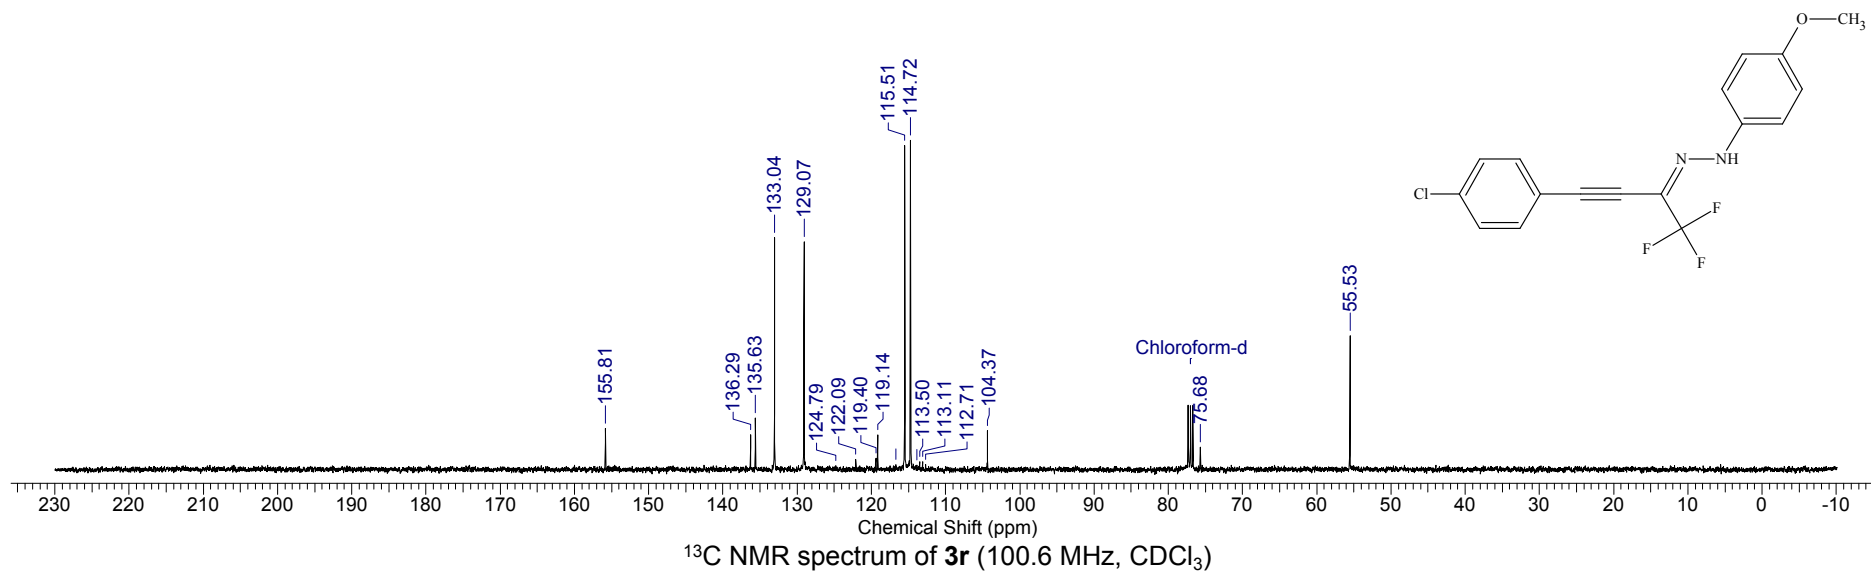



|           |          |                |                                                                   |
|-----------|----------|----------------|-------------------------------------------------------------------|
| <b>FW</b> | 352.7380 | <b>Formula</b> | C <sub>17</sub> H <sub>12</sub> ClF <sub>3</sub> N <sub>2</sub> O |
|-----------|----------|----------------|-------------------------------------------------------------------|

|                               |          |                               |             |                             |                                                           |                              |        |
|-------------------------------|----------|-------------------------------|-------------|-----------------------------|-----------------------------------------------------------|------------------------------|--------|
| <b>Acquisition Time (sec)</b> | 2.4117   | <b>Date</b>                   | Jan 22 2018 | <b>File Name</b>            | I:\SPEC_BM_F_2018.04.27\BM-1138-F_20180122_01\FLUORINE_01 |                              |        |
| <b>Frequency (MHz)</b>        | 376.31   | <b>Nucleus</b>                | 19F         | <b>Number of Transients</b> | 8                                                         | <b>Original Points Count</b> | 231897 |
| <b>Points Count</b>           | 262144   | <b>Pulse Sequence</b>         | s2pul       | <b>Solvent</b>              | CHLOROFORM-D                                              |                              |        |
| <b>Sweep Width (Hz)</b>       | 96153.84 | <b>Temperature (degree C)</b> | 5.000       |                             |                                                           |                              |        |

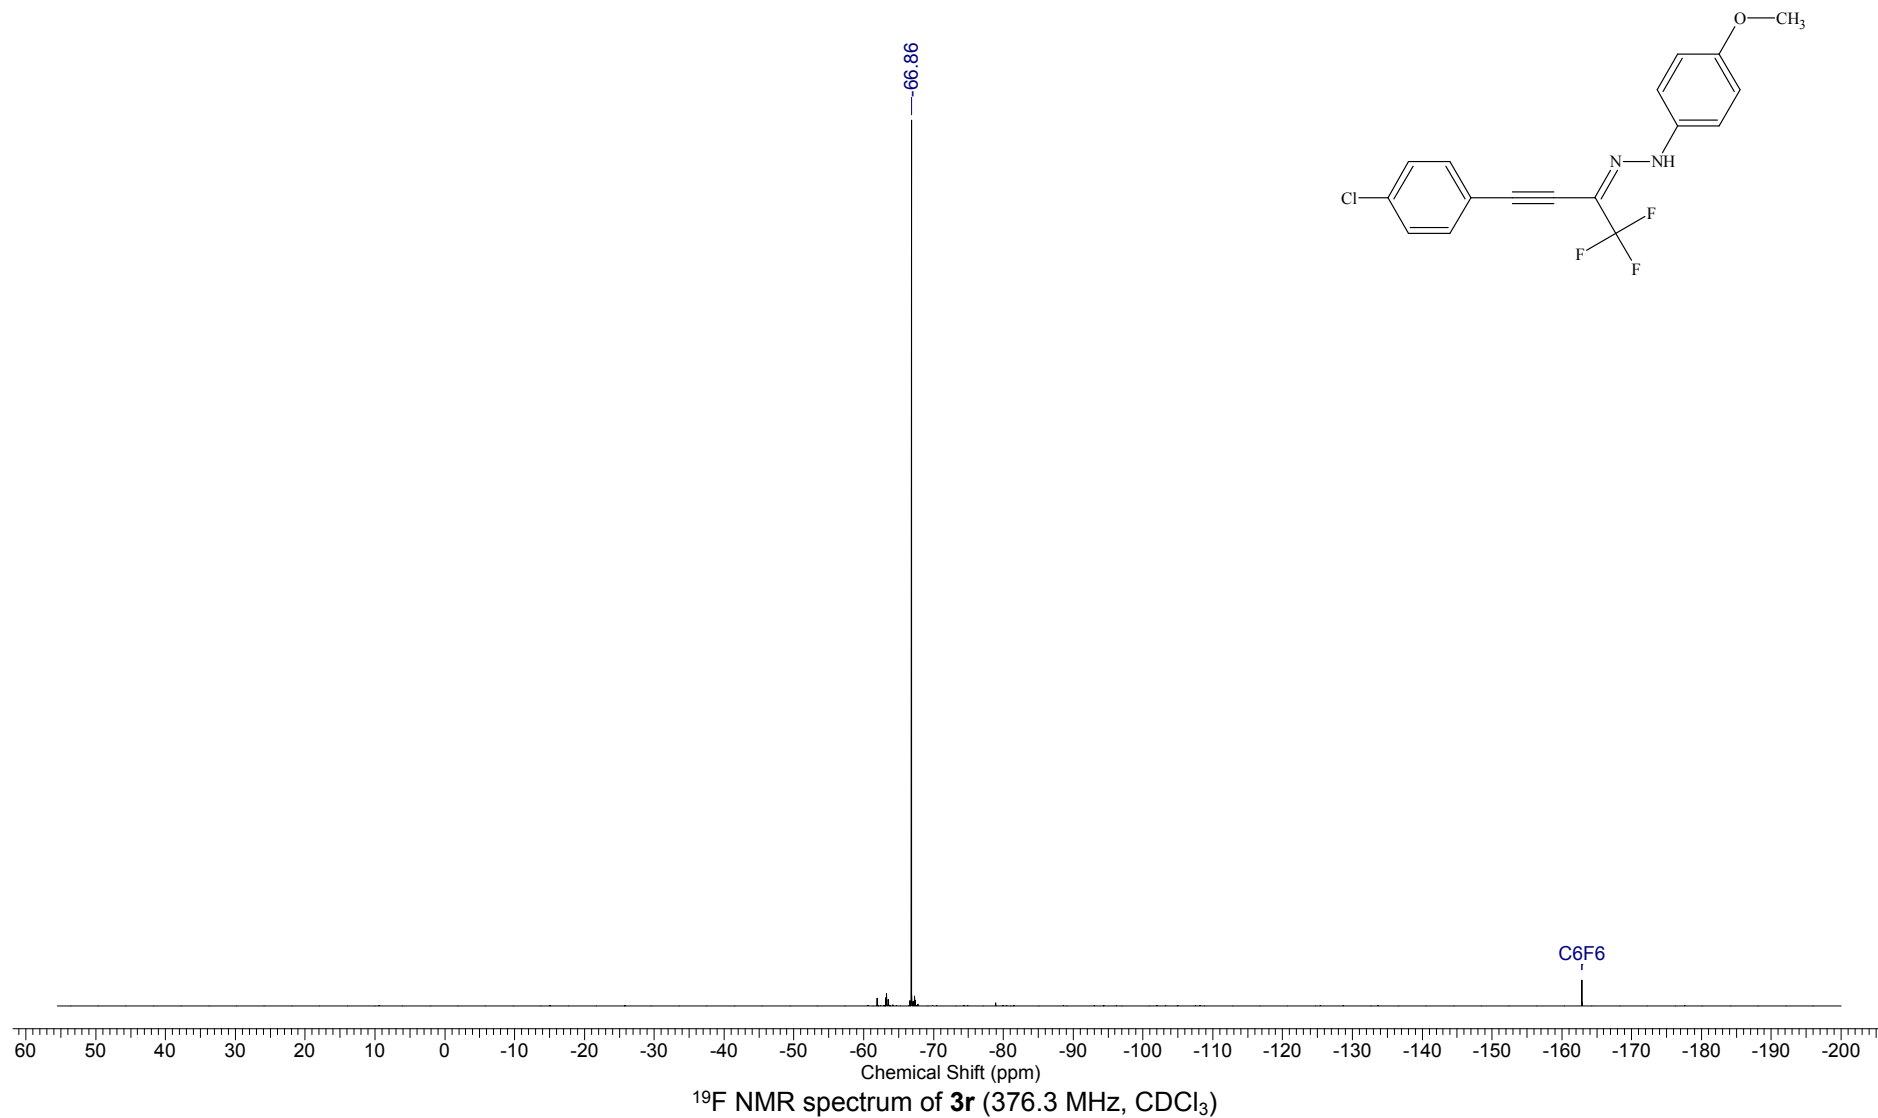

|           |          |                |                                                                |
|-----------|----------|----------------|----------------------------------------------------------------|
| <b>FW</b> | 414.1638 | <b>Formula</b> | C <sub>16</sub> H <sub>10</sub> F <sub>3</sub> IN <sub>2</sub> |
|-----------|----------|----------------|----------------------------------------------------------------|

|                               |                                                                           |                             |                      |                              |                      |
|-------------------------------|---------------------------------------------------------------------------|-----------------------------|----------------------|------------------------------|----------------------|
| <b>Acquisition Time (sec)</b> | 2.5559                                                                    | <b>Comment</b>              | Imported from UXNMR. | <b>Date</b>                  | 10 Oct 2016 15:35:44 |
| <b>File Name</b>              | C:\IBM_DATA\DOCS\Manuscr_Ultra\Iodo_Pyrazoles\BM-943,946\BM-943.H_001001r |                             |                      | <b>Frequency (MHz)</b>       | 400.13               |
| <b>Nucleus</b>                | 1H                                                                        | <b>Number of Transients</b> | 5                    | <b>Original Points Count</b> | 16384                |
| <b>Pulse Sequence</b>         | zg30                                                                      | <b>Solvent</b>              | CHLOROFORM-D         | <b>Points Count</b>          | 65536                |
| <b>Temperature (degree C)</b> | 27.000                                                                    |                             |                      | <b>Sweep Width (Hz)</b>      | 6410.26              |

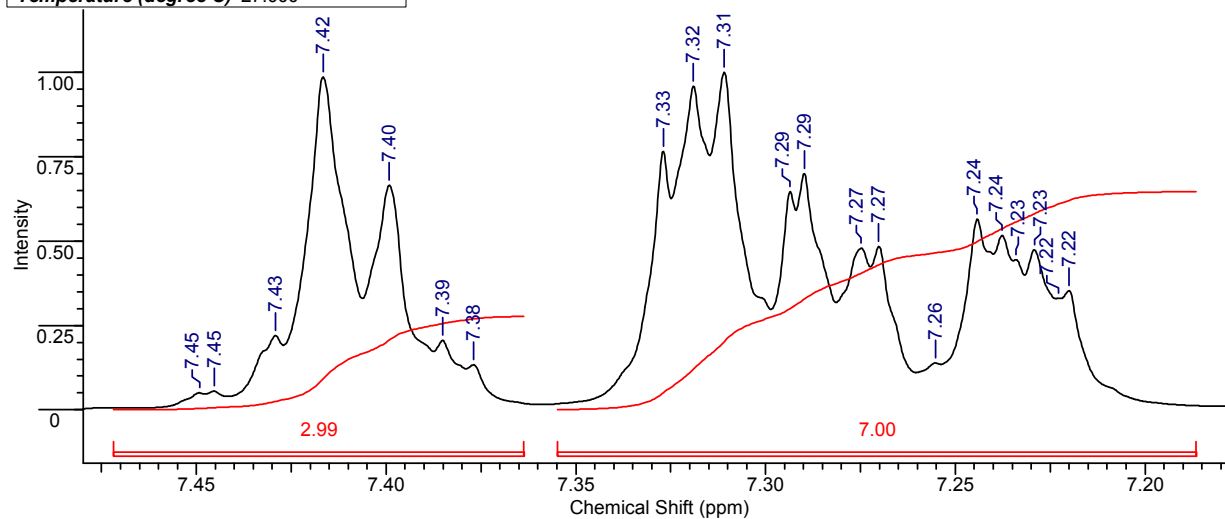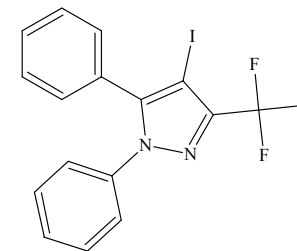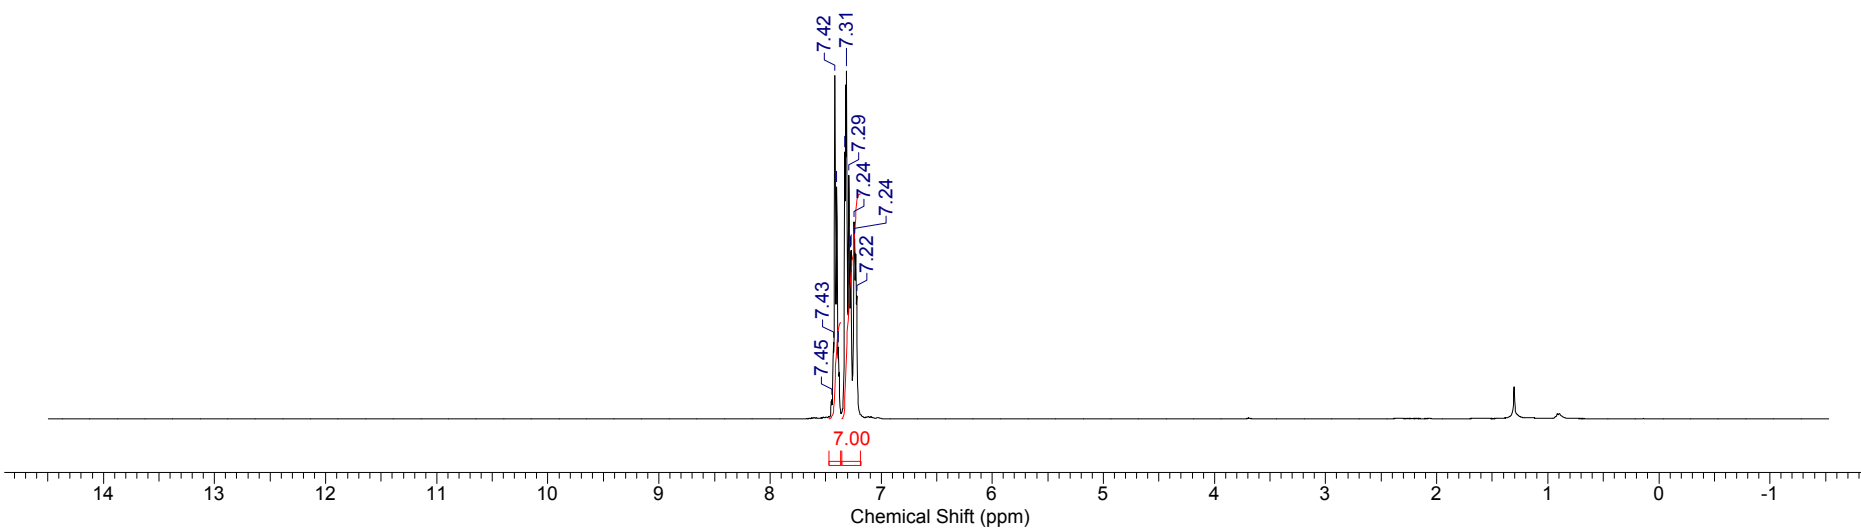

<sup>1</sup>H NMR spectrum of **4a** (400.1 MHz, CDCl<sub>3</sub>)

**FW** 414.1638 **Formula** C<sub>16</sub>H<sub>10</sub>F<sub>3</sub>IN<sub>2</sub>

|                               |                                                                         |                             |                      |                              |                        |                               |        |
|-------------------------------|-------------------------------------------------------------------------|-----------------------------|----------------------|------------------------------|------------------------|-------------------------------|--------|
| <b>Acquisition Time (sec)</b> | 0.4999                                                                  | <b>Comment</b>              | Imported from UXNMR. |                              | <b>Date</b>            | 10 Oct 2016 15:38:42          |        |
| <b>File Name</b>              | C:\BM_DATA\DOCS\Manuscr_UltraIodo_Pyrazoles\BM-943,946\BM-943.C_002001r |                             |                      |                              | <b>Frequency (MHz)</b> | 100.61                        |        |
| <b>Nucleus</b>                | 13C                                                                     | <b>Number of Transients</b> | 64                   | <b>Original Points Count</b> | 12076                  | <b>Points Count</b>           | 65536  |
| <b>Pulse Sequence</b>         | zgpg30                                                                  | <b>Solvent</b>              | DMSO-D6              | <b>Sweep Width (Hz)</b>      | 24154.59               | <b>Temperature (degree C)</b> | 27.000 |

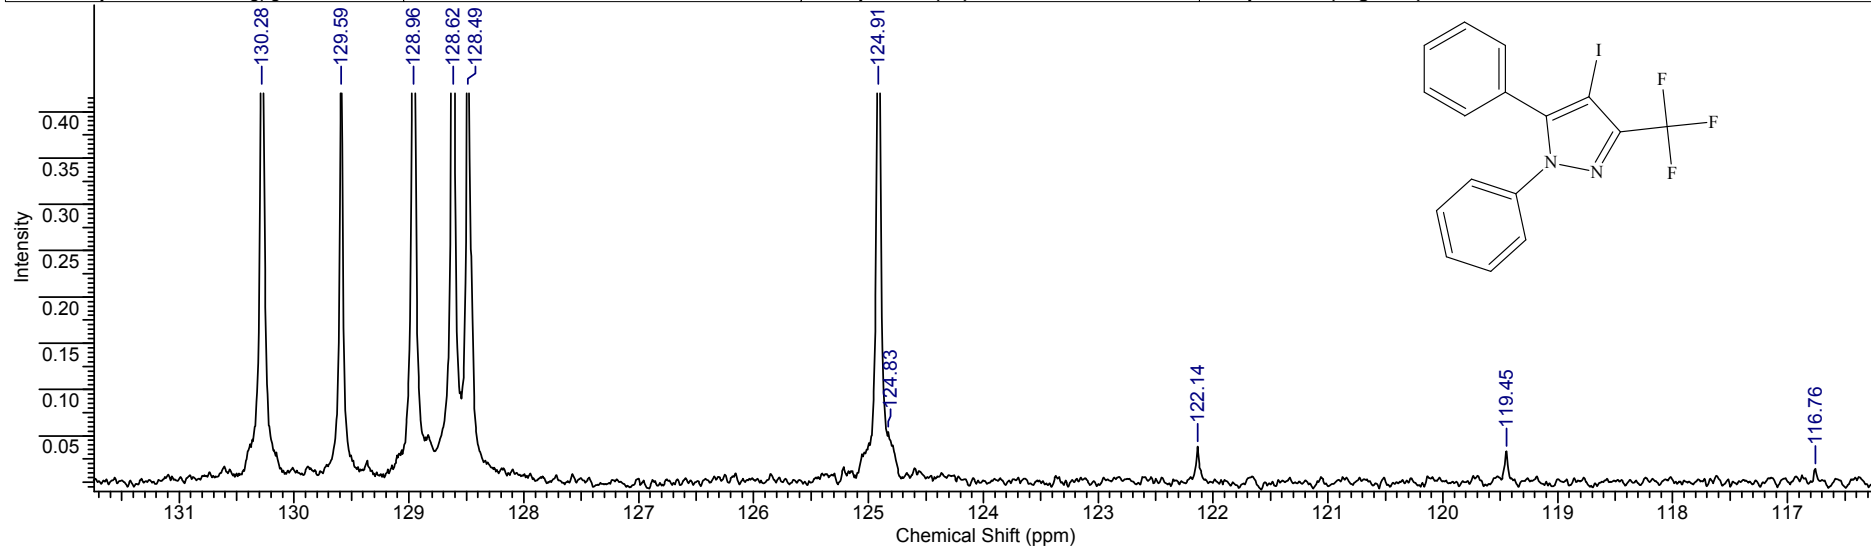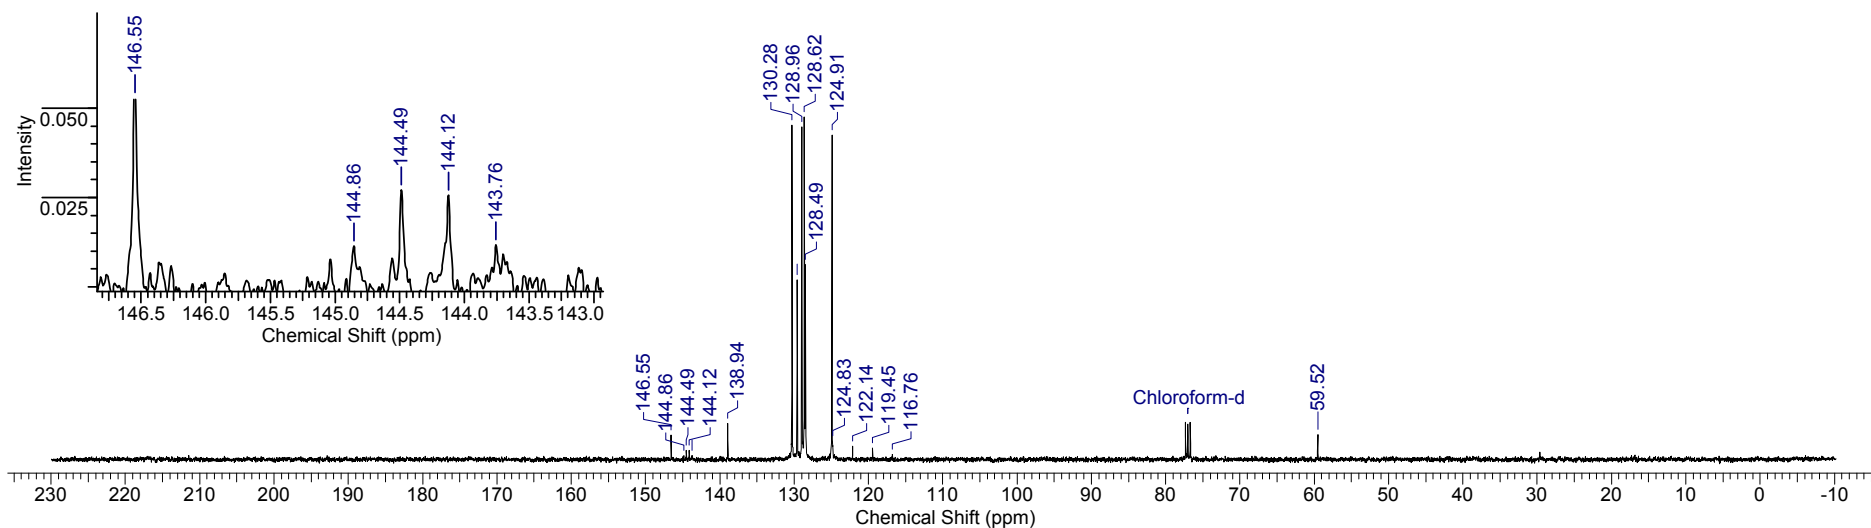

<sup>13</sup>C NMR spectrum of **4a** (100.6 MHz, CDCl<sub>3</sub>)

|           |          |                |                                                                |
|-----------|----------|----------------|----------------------------------------------------------------|
| <b>FW</b> | 414.1638 | <b>Formula</b> | C <sub>16</sub> H <sub>10</sub> F <sub>3</sub> IN <sub>2</sub> |
|-----------|----------|----------------|----------------------------------------------------------------|

|                               |        |                |                 |                             |                                                       |                              |                                      |                     |        |
|-------------------------------|--------|----------------|-----------------|-----------------------------|-------------------------------------------------------|------------------------------|--------------------------------------|---------------------|--------|
| <b>Acquisition Time (sec)</b> | 1.0000 | <b>Date</b>    | Oct 21 2016     | <b>File Name</b>            | C:\BM_DATA\BM-943,946F\BM-943_20161021_01\FLUORINE_01 |                              |                                      |                     |        |
| <b>Frequency (MHz)</b>        | 376.31 | <b>Nucleus</b> | <sup>19</sup> F | <b>Number of Transients</b> | 16                                                    | <b>Original Points Count</b> | 89286                                | <b>Points Count</b> | 131072 |
| <b>Pulse Sequence</b>         | s2pul  | <b>Solvent</b> | CHLOROFORM-D    | <b>Sweep Width (Hz)</b>     | 89285.71                                              |                              | <b>Temperature (degree C)</b> 25.000 |                     |        |

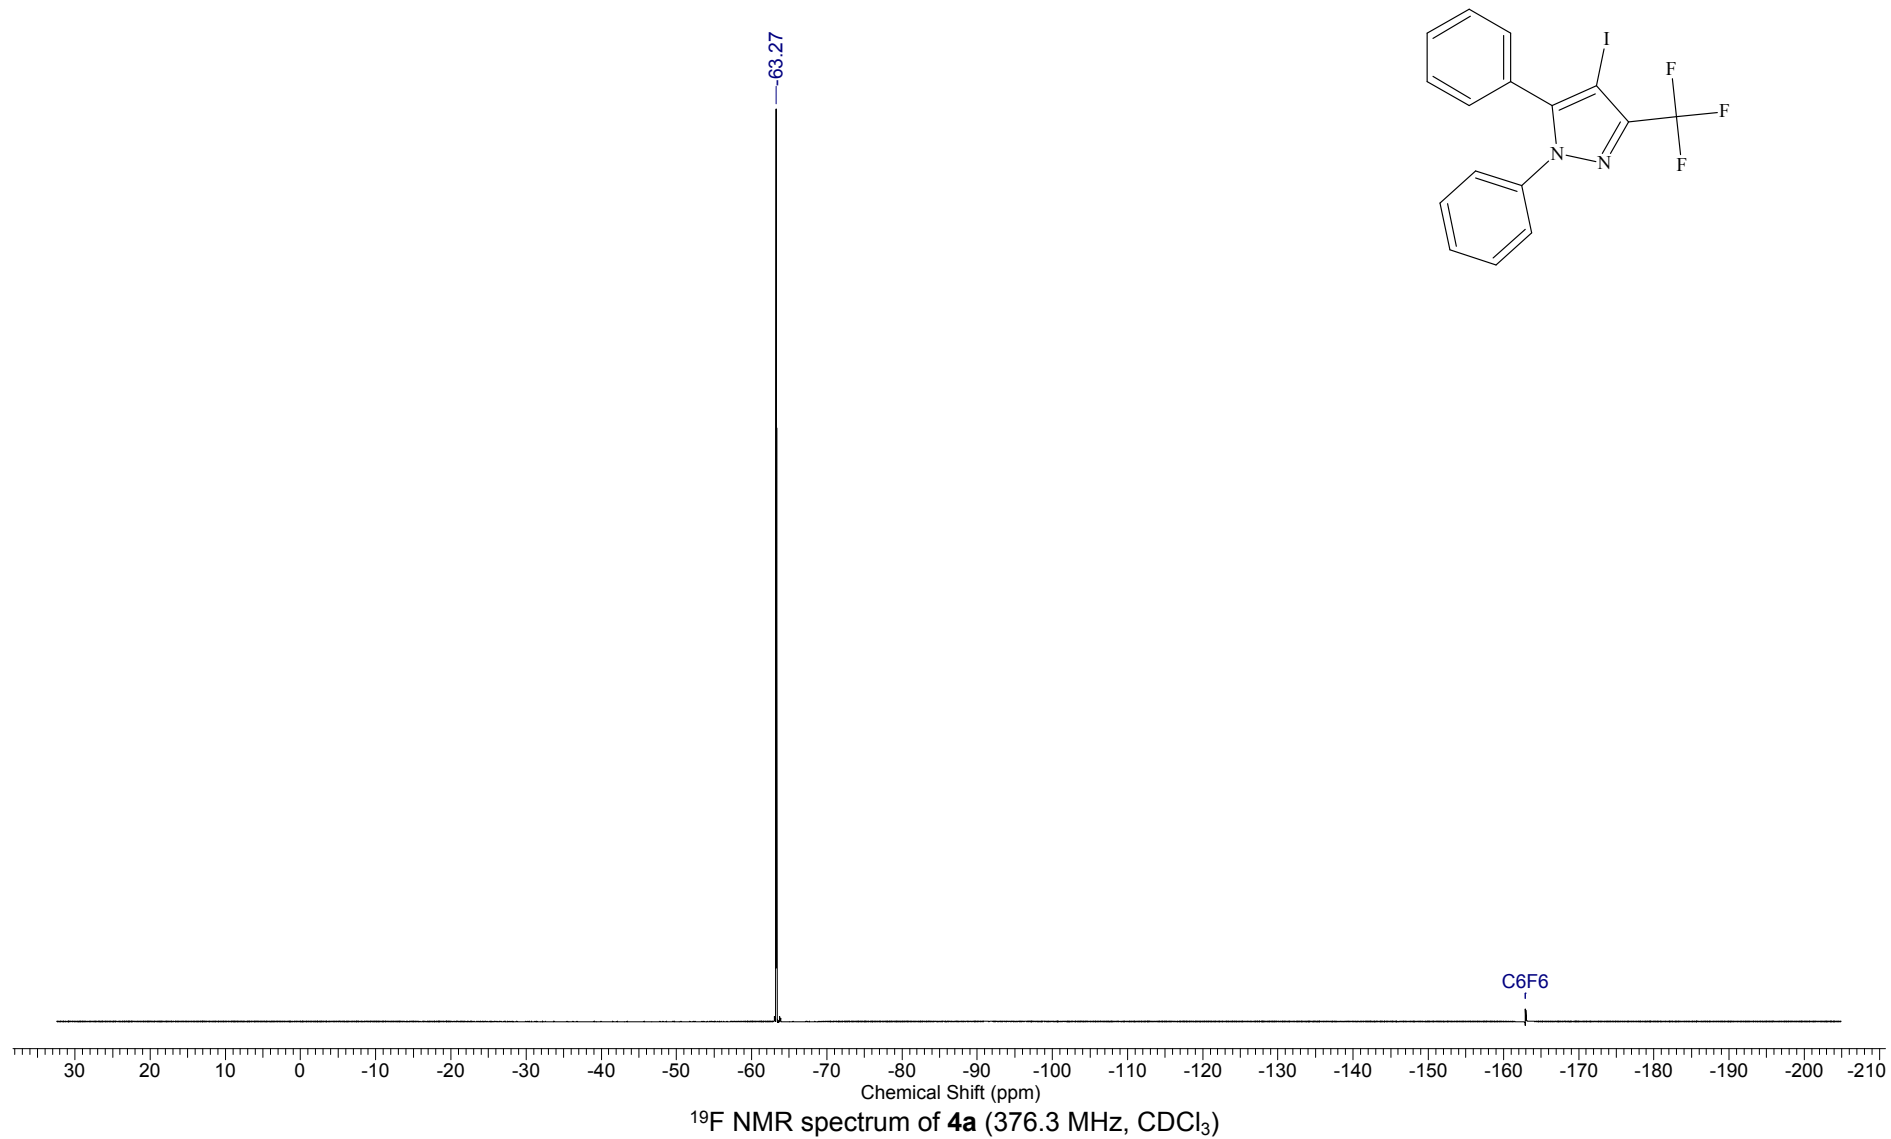

|    |          |         |                                                                 |
|----|----------|---------|-----------------------------------------------------------------|
| FW | 448.6085 | Formula | C <sub>16</sub> H <sub>9</sub> ClF <sub>3</sub> IN <sub>2</sub> |
|----|----------|---------|-----------------------------------------------------------------|

|                        |                                            |                        |                      |                |      |                      |              |
|------------------------|--------------------------------------------|------------------------|----------------------|----------------|------|----------------------|--------------|
| Acquisition Time (sec) | 2.5559                                     | Comment                | Imported from UXMNR. |                | Date | 30 May 2017 15:17:44 |              |
| File Name              | D:\BN\output\2017\05.i à\BM-1089.H_001001r | Frequency (MHz)        | 400.13               | Nucleus        | 1H   | Number of Transients | 4            |
| Original Points Count  | 16384                                      | Points Count           | 65536                | Pulse Sequence | zg30 | Solvent              | CHLOROFORM-D |
| Sweep Width (Hz)       | 6410.26                                    | Temperature (degree C) | 27.000               |                |      |                      |              |

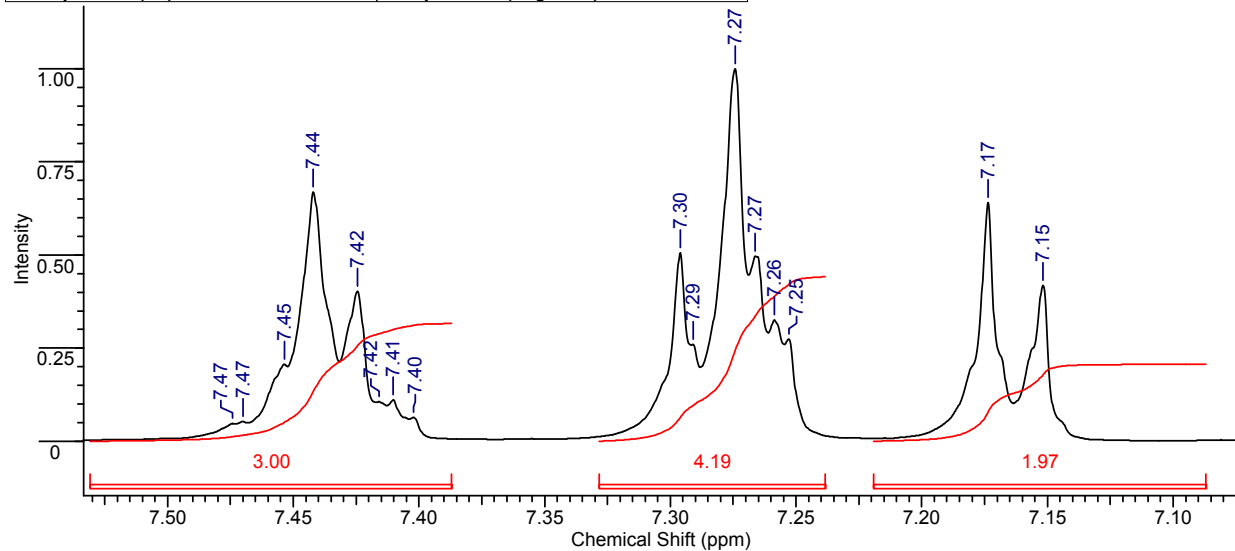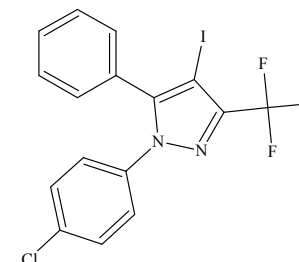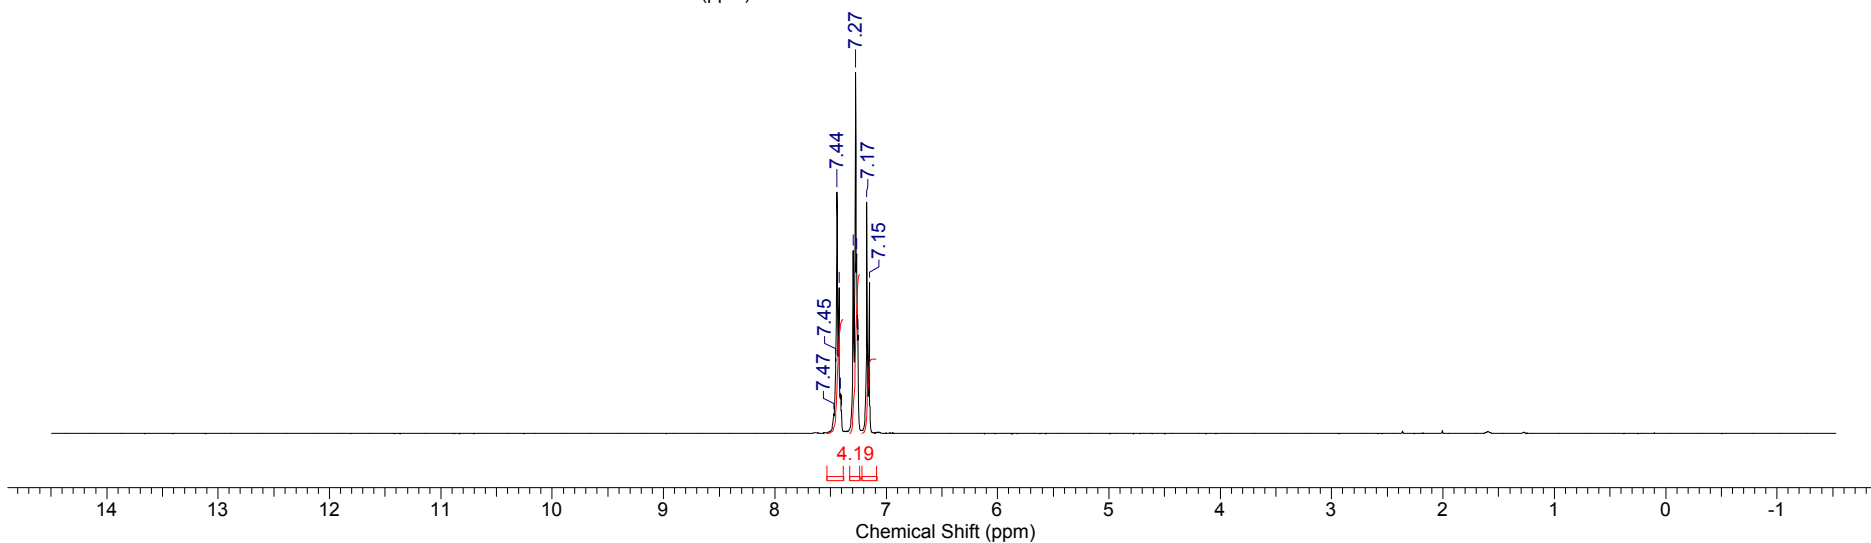

<sup>1</sup>H NMR spectrum of **4b** (400.1 MHz, CDCl<sub>3</sub>)

**FW** 448.6085 **Formula** C<sub>16</sub>H<sub>9</sub>ClF<sub>3</sub>IN<sub>2</sub>

|                               |                                              |                              |                      |                               |                      |
|-------------------------------|----------------------------------------------|------------------------------|----------------------|-------------------------------|----------------------|
| <b>Acquisition Time (sec)</b> | 0.4999                                       | <b>Comment</b>               | Imported from UXNMR. | <b>Date</b>                   | 30 May 2017 15:24:38 |
| <b>File Name</b>              | D:\BN\output\2017\05.i à à\BM-1089.C_002001r | <b>Frequency (MHz)</b>       | 100.61               | <b>Nucleus</b>                | 13C                  |
| <b>Number of Transients</b>   | 124                                          | <b>Original Points Count</b> | 12076                | <b>Points Count</b>           | 65536                |
| <b>Solvent</b>                | CHLOROFORM-D                                 | <b>Sweep Width (Hz)</b>      | 24154.59             | <b>Pulse Sequence</b>         | zgpg30               |
|                               |                                              |                              |                      | <b>Temperature (degree C)</b> | 27.000               |

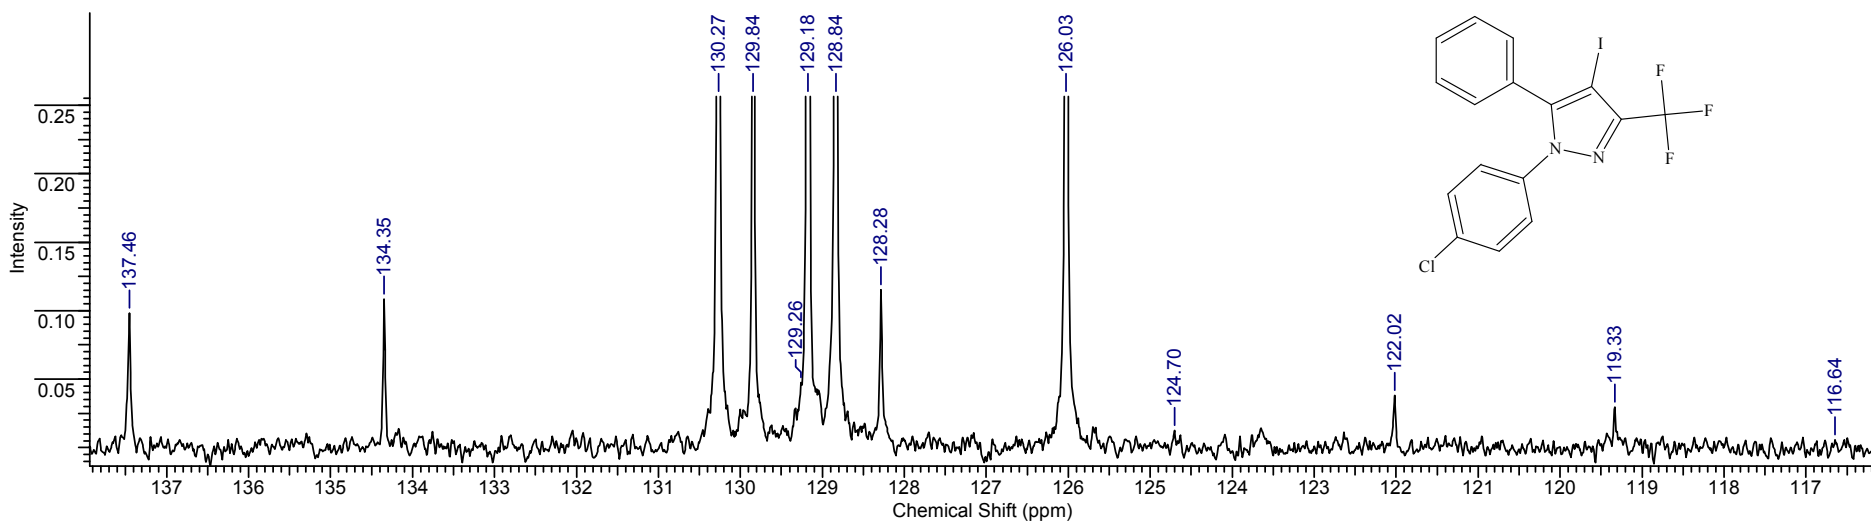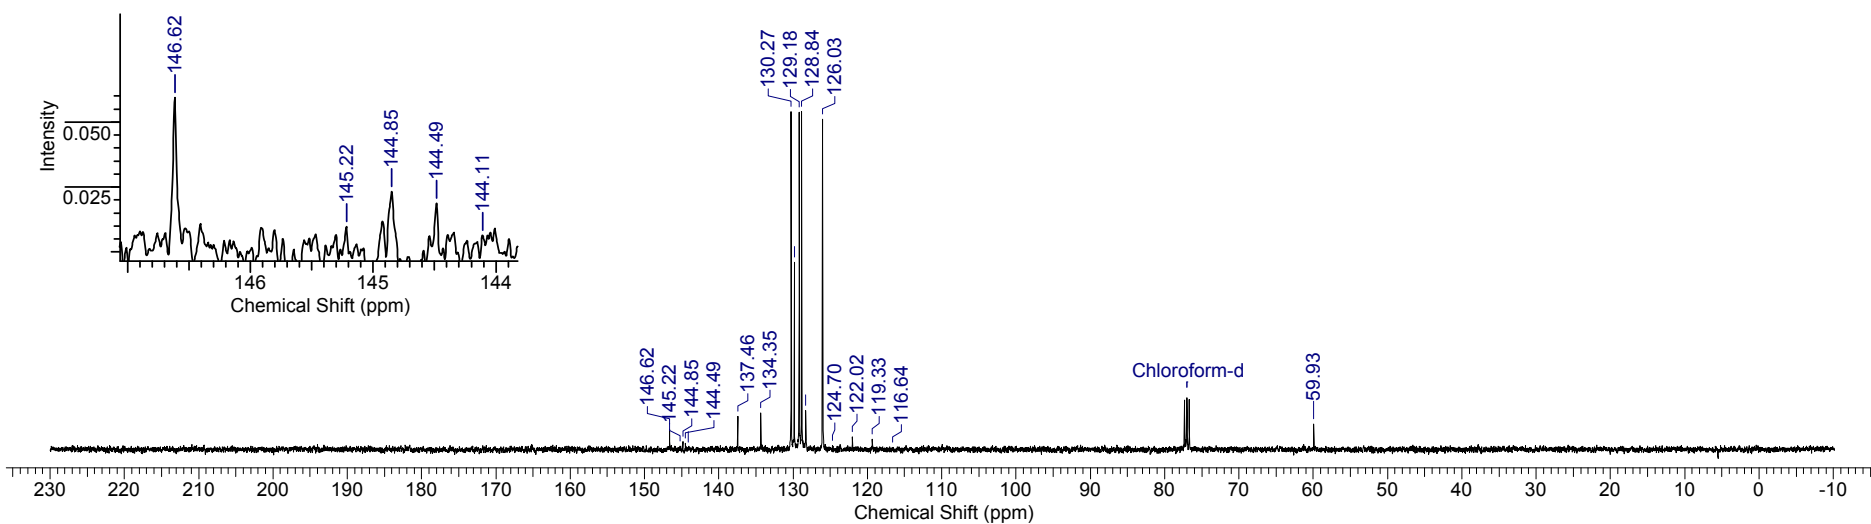

<sup>13</sup>C NMR spectrum of **4b** (100.6 MHz, CDCl<sub>3</sub>)

|           |          |                |                                                                               |
|-----------|----------|----------------|-------------------------------------------------------------------------------|
| <b>FW</b> | 448.6085 | <b>Formula</b> | C <sub>16</sub> H <sub>9</sub> ClF <sub>3</sub> I <sub>2</sub> N <sub>2</sub> |
|-----------|----------|----------------|-------------------------------------------------------------------------------|

|                               |          |                               |                 |                             |                                                                               |                              |        |
|-------------------------------|----------|-------------------------------|-----------------|-----------------------------|-------------------------------------------------------------------------------|------------------------------|--------|
| <b>Acquisition Time (sec)</b> | 1.5000   | <b>Date</b>                   | May 31 2017     | <b>File Name</b>            | D:\BN\Docs (BN)\vasily\SPEC_BM_F\2017.06.03_F\BM-1089_20170531_01\FLUORINE_01 |                              |        |
| <b>Frequency (MHz)</b>        | 376.31   | <b>Nucleus</b>                | <sup>19</sup> F | <b>Number of Transients</b> | 16                                                                            | <b>Original Points Count</b> | 133929 |
| <b>Points Count</b>           | 262144   | <b>Pulse Sequence</b>         | s2pul           | <b>Solvent</b>              | CHLOROFORM-D                                                                  |                              |        |
| <b>Sweep Width (Hz)</b>       | 89285.71 | <b>Temperature (degree C)</b> | 25.000          |                             |                                                                               |                              |        |

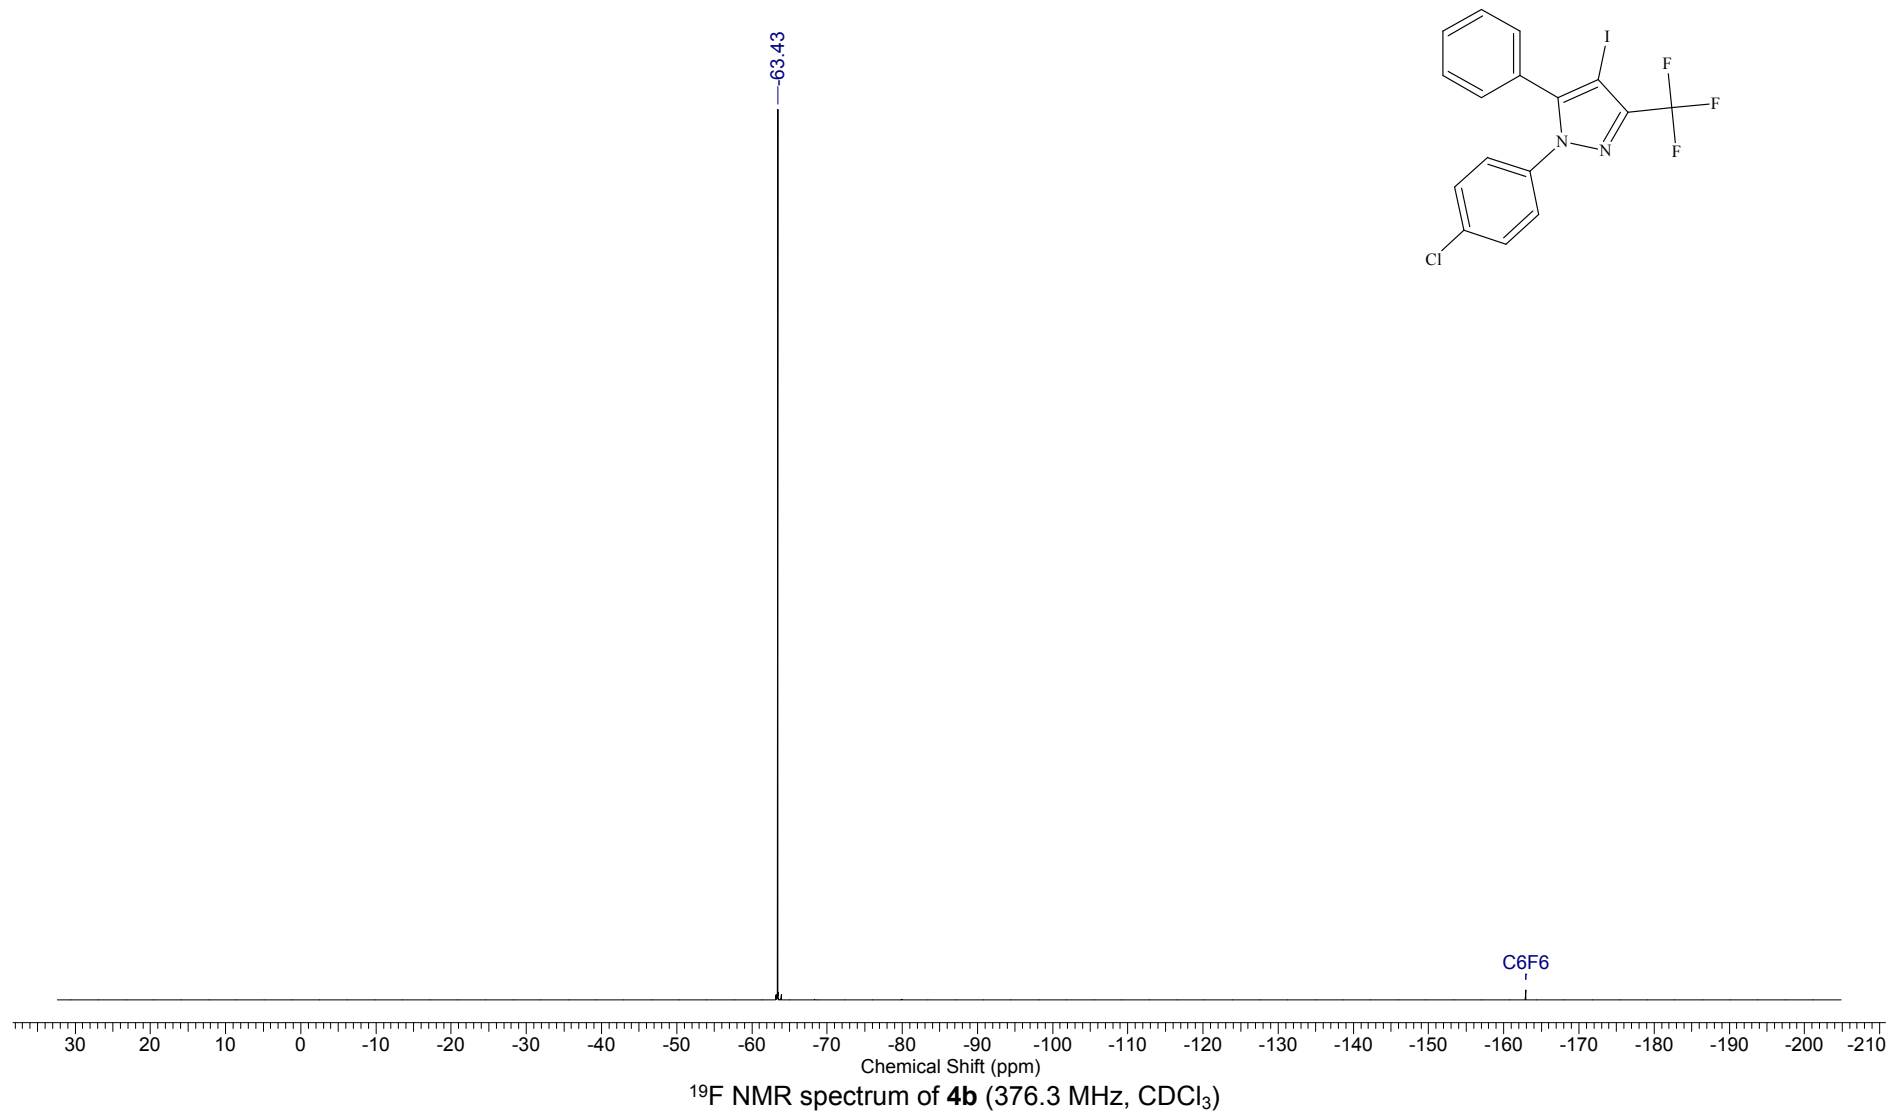

|           |          |                |                                                               |
|-----------|----------|----------------|---------------------------------------------------------------|
| <b>FW</b> | 432.1542 | <b>Formula</b> | C <sub>16</sub> H <sub>9</sub> F <sub>4</sub> IN <sub>2</sub> |
|-----------|----------|----------------|---------------------------------------------------------------|

|                               |                                             |                               |                        |                       |                |                      |                             |   |
|-------------------------------|---------------------------------------------|-------------------------------|------------------------|-----------------------|----------------|----------------------|-----------------------------|---|
| <b>Acquisition Time (sec)</b> | 2.5559                                      | <b>Comment</b>                | Imported from UXMNR.   |                       | <b>Date</b>    | 31 May 2017 17:44:48 |                             |   |
| <b>File Name</b>              | D:\BN\output\2017\05.i àé\BM-1092.H_001001r |                               | <b>Frequency (MHz)</b> | 400.13                | <b>Nucleus</b> | 1H                   | <b>Number of Transients</b> | 4 |
| <b>Original Points Count</b>  | 16384                                       | <b>Points Count</b>           | 65536                  | <b>Pulse Sequence</b> | zg30           | <b>Solvent</b>       | CHLOROFORM-D                |   |
| <b>Sweep Width (Hz)</b>       | 6410.26                                     | <b>Temperature (degree C)</b> | 27.000                 |                       |                |                      |                             |   |

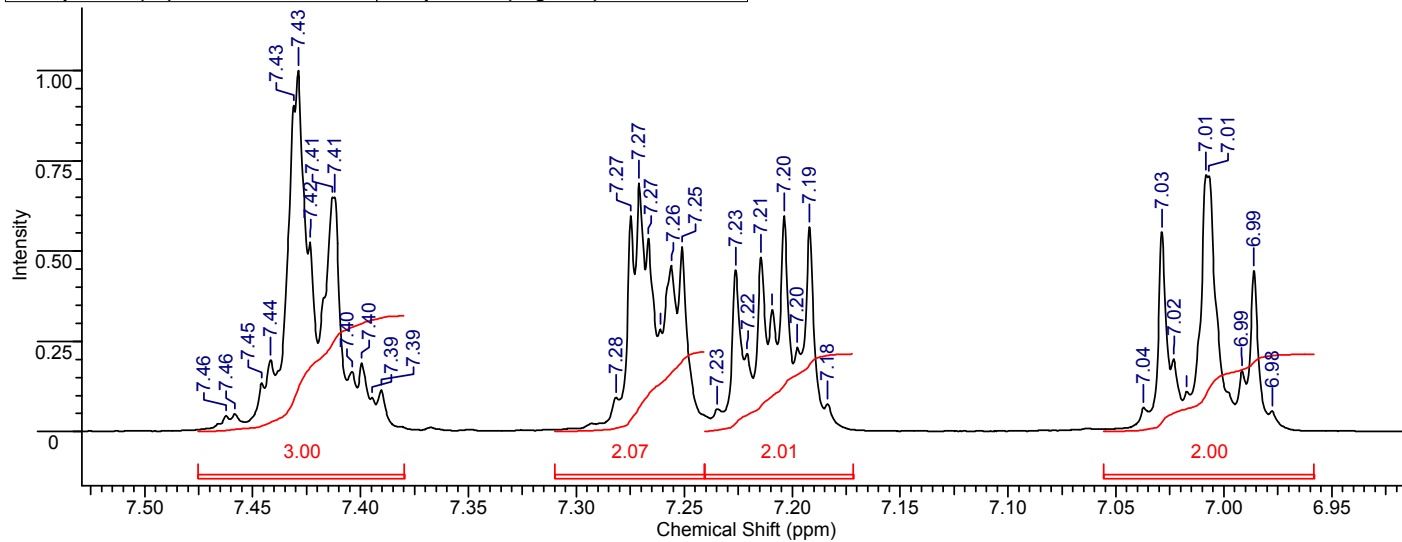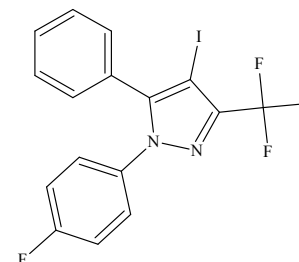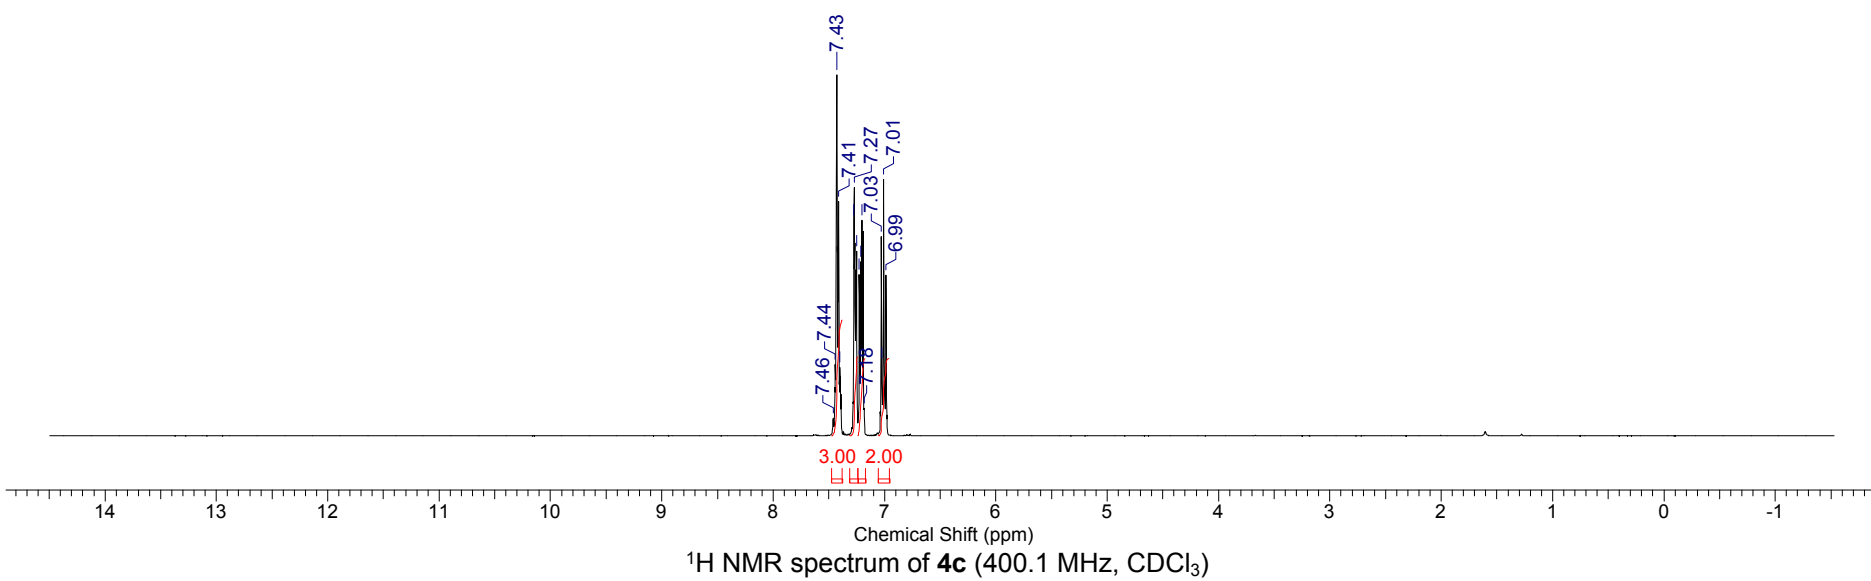



|           |          |                                                                              |
|-----------|----------|------------------------------------------------------------------------------|
| <b>FW</b> | 432.1542 | <b>Formula</b> C <sub>16</sub> H <sub>9</sub> F <sub>4</sub> IN <sub>2</sub> |
|-----------|----------|------------------------------------------------------------------------------|

|                               |                                            |                              |                      |                               |                      |
|-------------------------------|--------------------------------------------|------------------------------|----------------------|-------------------------------|----------------------|
| <b>Acquisition Time (sec)</b> | 0.4999                                     | <b>Comment</b>               | Imported from UYNMR. | <b>Date</b>                   | 31 May 2017 17:47:30 |
| <b>File Name</b>              | D:\BN\output\2017\05.i à\BM-1092.C_002001r | <b>Frequency (MHz)</b>       | 100.61               | <b>Nucleus</b>                | 13C                  |
| <b>Number of Transients</b>   | 64                                         | <b>Original Points Count</b> | 12076                | <b>Points Count</b>           | 65536                |
| <b>Solvent</b>                | CHLOROFORM-D                               | <b>Sweep Width (Hz)</b>      | 24154.59             | <b>Pulse Sequence</b>         | zgpg30               |
|                               |                                            |                              |                      | <b>Temperature (degree C)</b> | 27.000               |

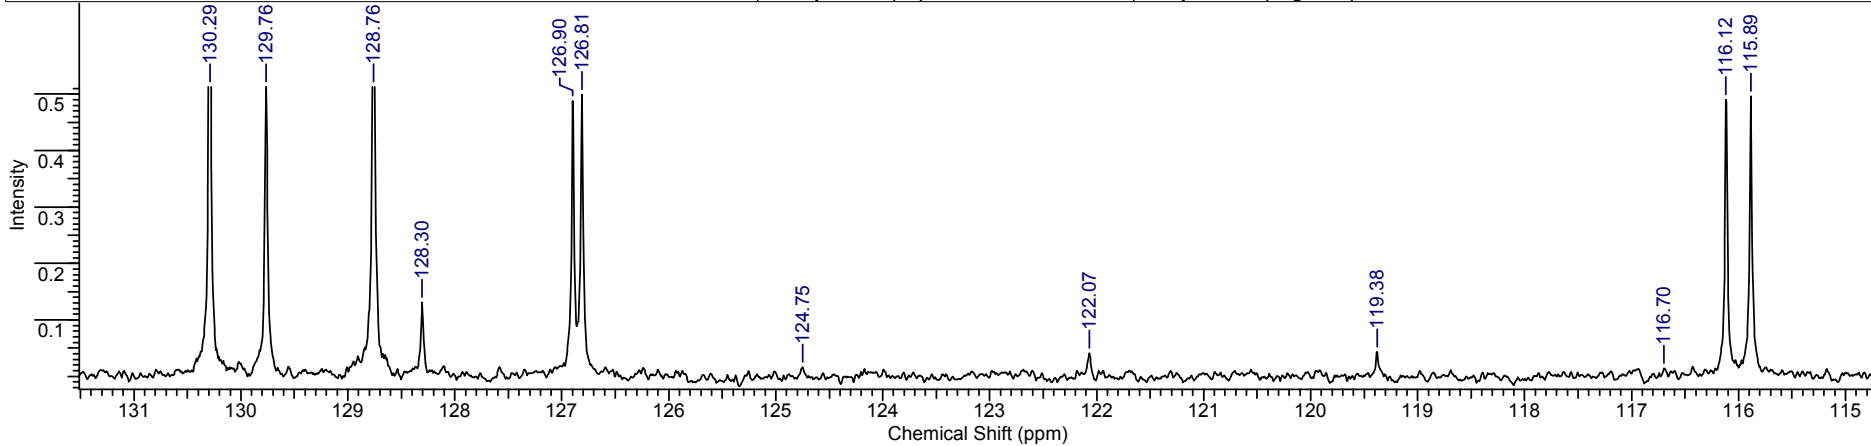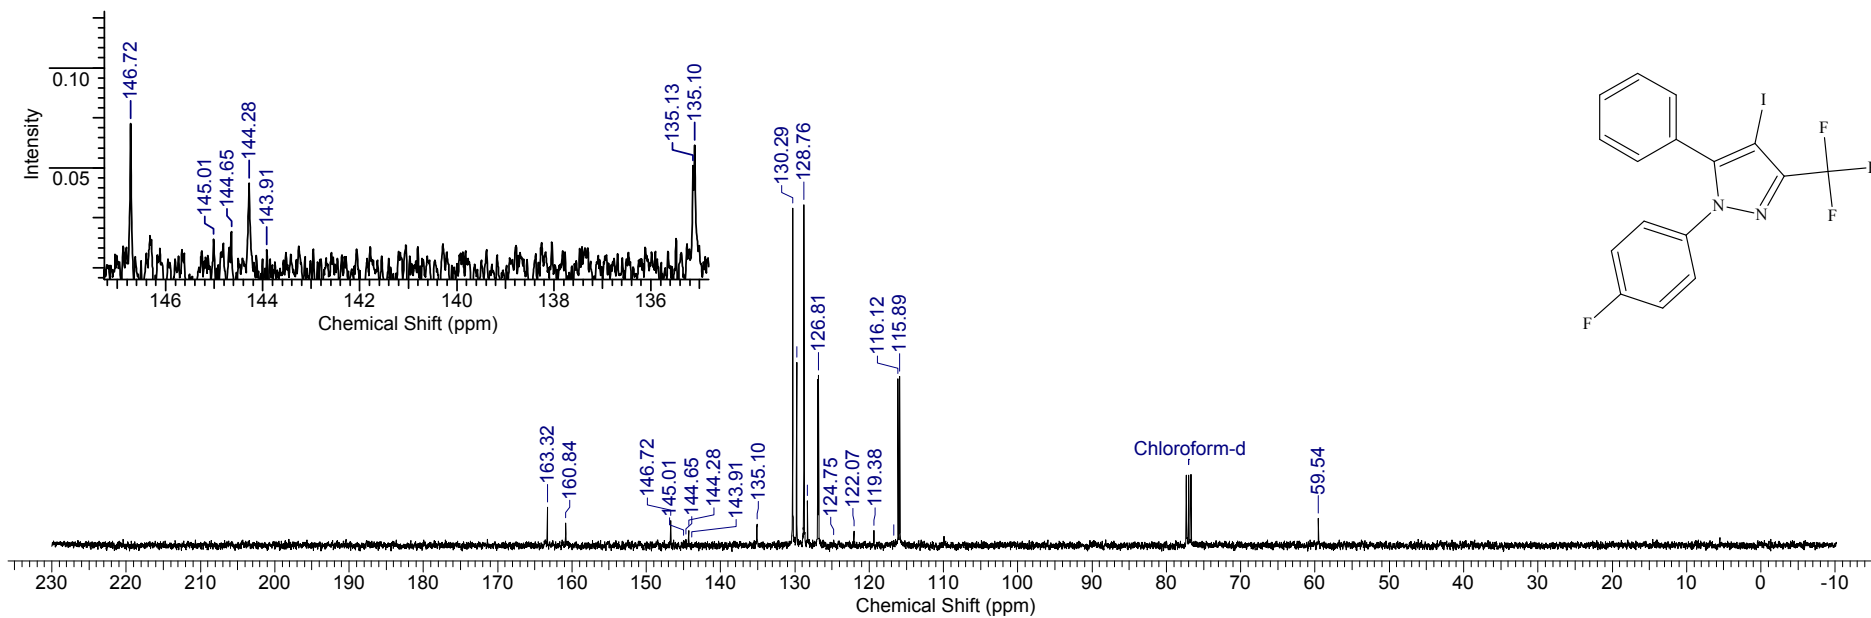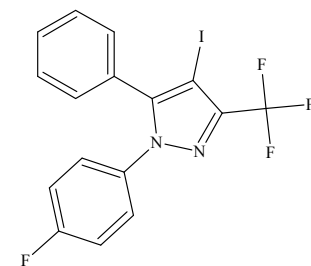

<sup>13</sup>C NMR spectrum of **4c** (100.6 MHz, CDCl<sub>3</sub>)

|           |          |                |                                                               |
|-----------|----------|----------------|---------------------------------------------------------------|
| <b>FW</b> | 432.1542 | <b>Formula</b> | C <sub>16</sub> H <sub>9</sub> F <sub>4</sub> IN <sub>2</sub> |
|-----------|----------|----------------|---------------------------------------------------------------|

|                               |           |                               |                 |                             |                                                                      |                              |        |
|-------------------------------|-----------|-------------------------------|-----------------|-----------------------------|----------------------------------------------------------------------|------------------------------|--------|
| <b>Acquisition Time (sec)</b> | 2.0000    | <b>Date</b>                   | Jun 1 2017      | <b>File Name</b>            | D:\BN\output\F19\F_2017\2017.06.01\BM-1092-F_20170601_01\FLUORINE_01 |                              |        |
| <b>Frequency (MHz)</b>        | 376.33    | <b>Nucleus</b>                | <sup>19</sup> F | <b>Number of Transients</b> | 8                                                                    | <b>Original Points Count</b> | 250000 |
| <b>Points Count</b>           | 262144    | <b>Pulse Sequence</b>         | s2pul           | <b>Solvent</b>              | CHLOROFORM-D                                                         |                              |        |
| <b>Sweep Width (Hz)</b>       | 125000.00 | <b>Temperature (degree C)</b> | 22.000          |                             |                                                                      |                              |        |

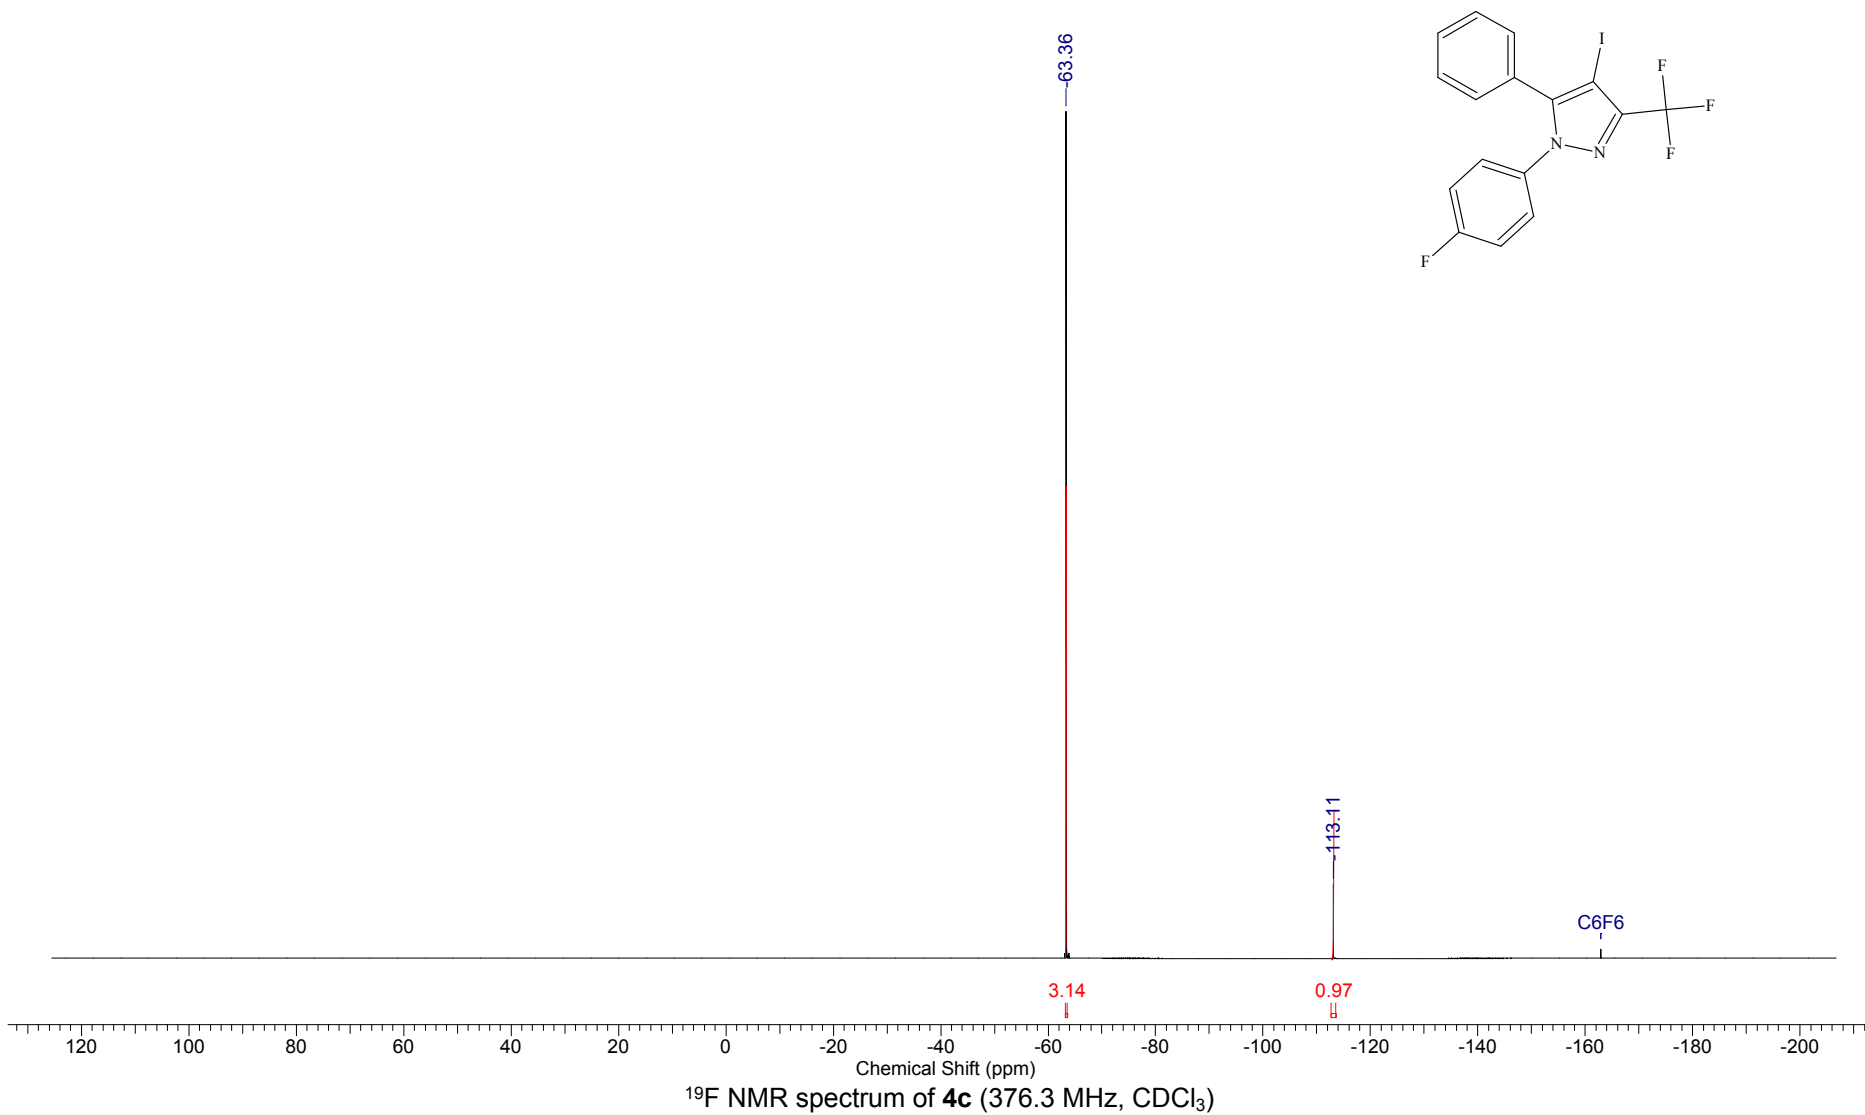

|           |          |                |                                                                |
|-----------|----------|----------------|----------------------------------------------------------------|
| <b>FW</b> | 428.1903 | <b>Formula</b> | C <sub>17</sub> H <sub>12</sub> F <sub>3</sub> IN <sub>2</sub> |
|-----------|----------|----------------|----------------------------------------------------------------|

|                               |                                            |                               |                      |                       |             |                             |              |
|-------------------------------|--------------------------------------------|-------------------------------|----------------------|-----------------------|-------------|-----------------------------|--------------|
| <b>Acquisition Time (sec)</b> | 2.5559                                     | <b>Comment</b>                | Imported from UXMNR. |                       | <b>Date</b> | 30 May 2017 15:40:32        |              |
| <b>File Name</b>              | D:\BN\output\2017\05.i à\BM-1091.H_001001r | <b>Frequency (MHz)</b>        | 400.13               | <b>Nucleus</b>        | 1H          | <b>Number of Transients</b> | 4            |
| <b>Original Points Count</b>  | 16384                                      | <b>Points Count</b>           | 65536                | <b>Pulse Sequence</b> | zg30        | <b>Solvent</b>              | CHLOROFORM-D |
| <b>Sweep Width (Hz)</b>       | 6410.26                                    | <b>Temperature (degree C)</b> | 27.000               |                       |             |                             |              |

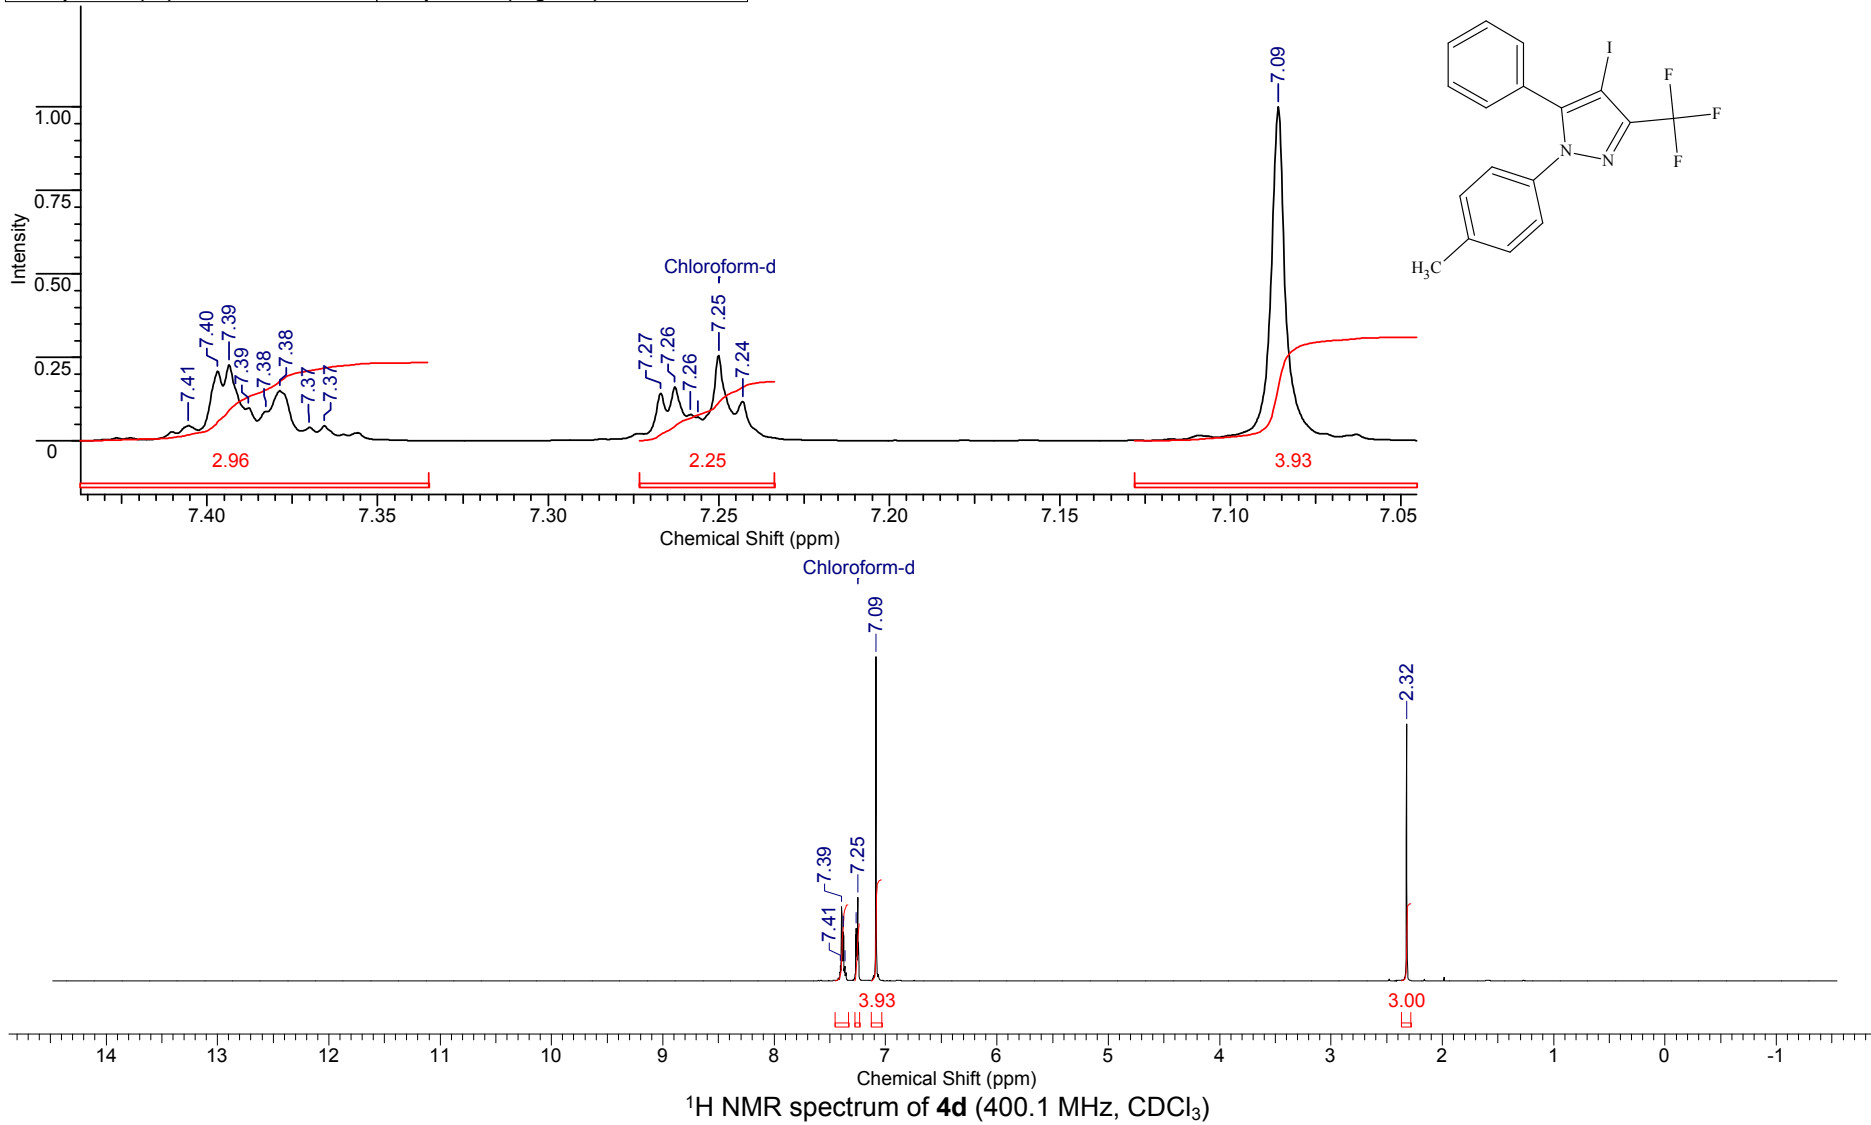

**FW** 428.1903 **Formula** C<sub>17</sub>H<sub>12</sub>F<sub>3</sub>IN<sub>2</sub>

|                               |                                             |                              |                      |                               |                      |
|-------------------------------|---------------------------------------------|------------------------------|----------------------|-------------------------------|----------------------|
| <b>Acquisition Time (sec)</b> | 0.4999                                      | <b>Comment</b>               | Imported from UXMNR. | <b>Date</b>                   | 30 May 2017 15:45:44 |
| <b>File Name</b>              | D:\BN\output\2017\05.i àé\BM-1091.C_002001r | <b>Frequency (MHz)</b>       | 100.61               | <b>Nucleus</b>                | 13C                  |
| <b>Number of Transients</b>   | 166                                         | <b>Original Points Count</b> | 12076                | <b>Points Count</b>           | 65536                |
| <b>Solvent</b>                | CHLOROFORM-D                                | <b>Sweep Width (Hz)</b>      | 24154.59             | <b>Pulse Sequence</b>         | zgpg30               |
|                               |                                             |                              |                      | <b>Temperature (degree C)</b> | 27.000               |

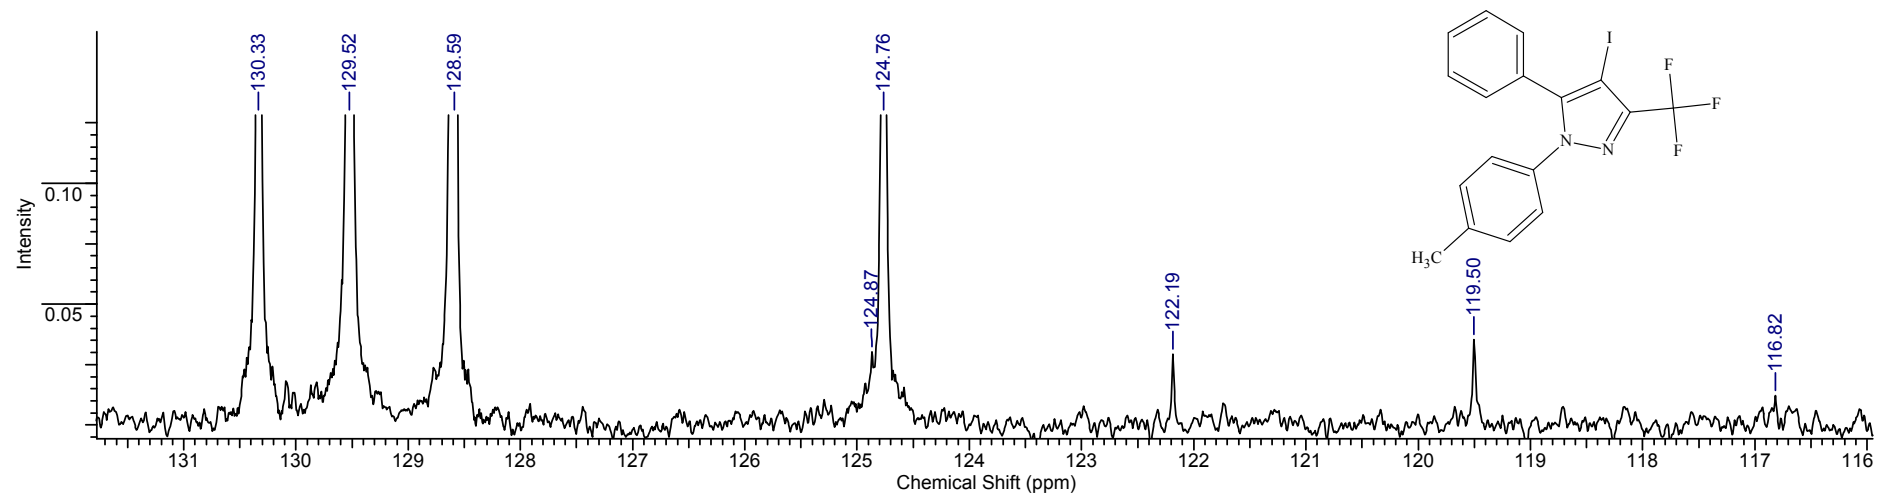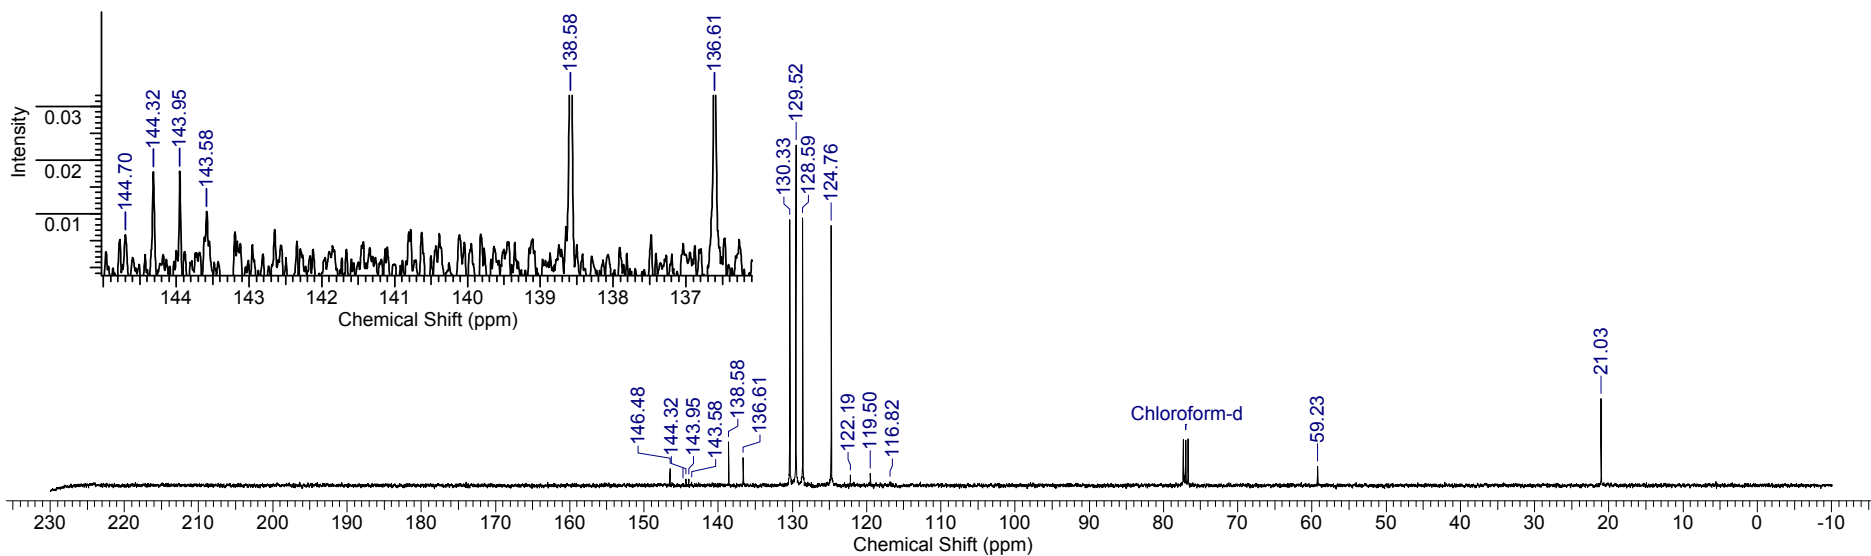

<sup>13</sup>C NMR spectrum of **4d** (100.6 MHz, CDCl<sub>3</sub>)

|           |          |                |                                                                |
|-----------|----------|----------------|----------------------------------------------------------------|
| <b>FW</b> | 428.1903 | <b>Formula</b> | C <sub>17</sub> H <sub>12</sub> F <sub>3</sub> IN <sub>2</sub> |
|-----------|----------|----------------|----------------------------------------------------------------|

|                               |          |                               |                 |                             |                                                                               |                              |        |
|-------------------------------|----------|-------------------------------|-----------------|-----------------------------|-------------------------------------------------------------------------------|------------------------------|--------|
| <b>Acquisition Time (sec)</b> | 1.5000   | <b>Date</b>                   | May 31 2017     | <b>File Name</b>            | D:\BN\Docs (BN)\vasily\SPEC_BM_F\2017.06.03_F\BM-1091_20170531_01\FLUORINE_01 |                              |        |
| <b>Frequency (MHz)</b>        | 376.31   | <b>Nucleus</b>                | <sup>19</sup> F | <b>Number of Transients</b> | 16                                                                            | <b>Original Points Count</b> | 133929 |
| <b>Points Count</b>           | 262144   | <b>Pulse Sequence</b>         | s2pul           | <b>Solvent</b>              | CHLOROFORM-D                                                                  |                              |        |
| <b>Sweep Width (Hz)</b>       | 89285.71 | <b>Temperature (degree C)</b> | 25.000          |                             |                                                                               |                              |        |

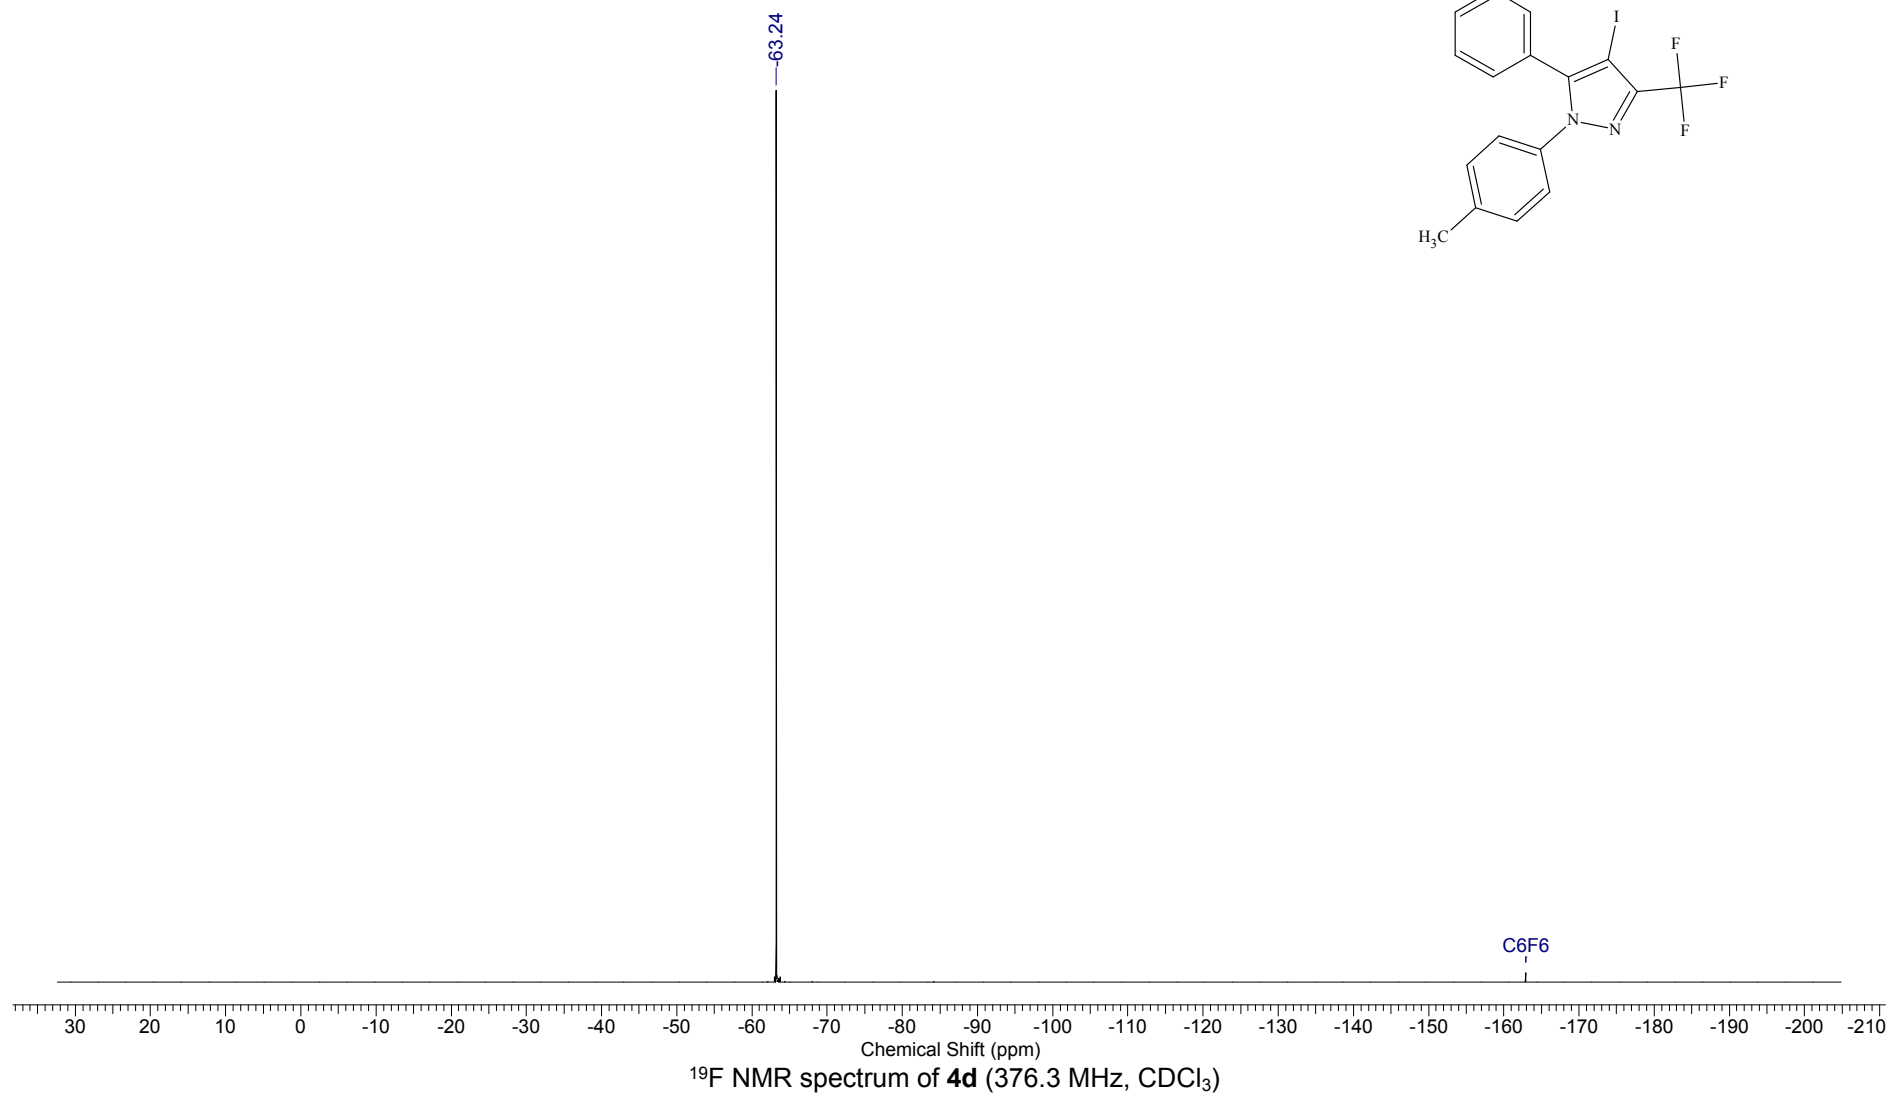

FW 444.1897 Formula C<sub>17</sub>H<sub>12</sub>F<sub>3</sub>IN<sub>2</sub>O

| Acquisition Time (sec) | 2.5559                                     | Comment                | Imported from UXMNR. |                | Date | 30 May 2017 15:26:30 |              |
|------------------------|--------------------------------------------|------------------------|----------------------|----------------|------|----------------------|--------------|
| File Name              | D:\BN\output\2017\05.i à\BM-1090.H_001001r | Frequency (MHz)        | 400.13               | Nucleus        | 1H   | Number of Transients | 4            |
| Original Points Count  | 16384                                      | Points Count           | 65536                | Pulse Sequence | zg30 | Solvent              | CHLOROFORM-D |
| Sweep Width (Hz)       | 6410.26                                    | Temperature (degree C) | 27.000               |                |      |                      |              |

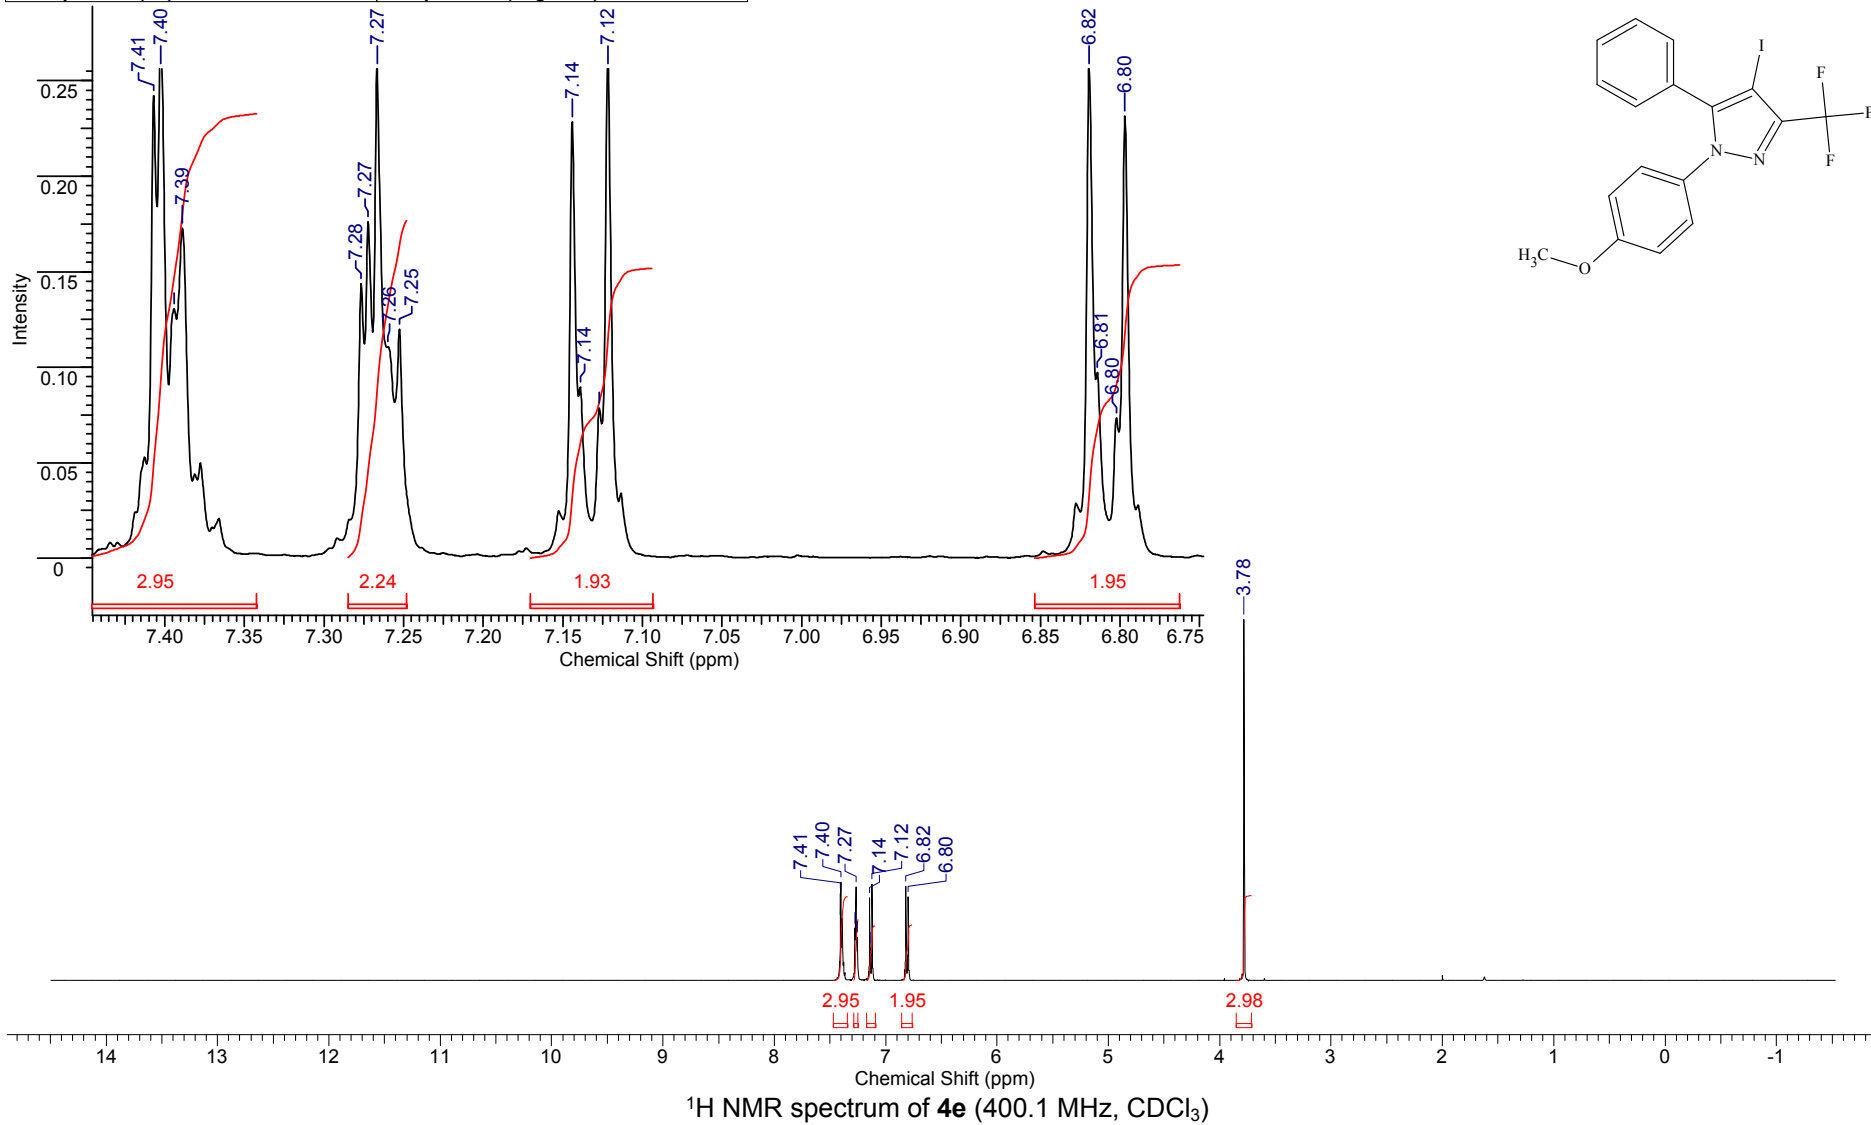

**FW** 444.1897 **Formula** C<sub>17</sub>H<sub>12</sub>F<sub>3</sub>IN<sub>2</sub>O

|                               |                                            |                              |                      |                               |                              |                      |
|-------------------------------|--------------------------------------------|------------------------------|----------------------|-------------------------------|------------------------------|----------------------|
| <b>Acquisition Time (sec)</b> | 0.4999                                     | <b>Comment</b>               | Imported from UXNMR. |                               | <b>Date</b>                  | 30 May 2017 15:30:36 |
| <b>File Name</b>              | D:\BN\output\2017\05.i à\BM-1090.C_002001r | <b>Frequency (MHz)</b>       | 100.61               | <b>Nucleus</b>                | 13C                          |                      |
| <b>Number of Transients</b>   | 125                                        | <b>Original Points Count</b> | 12076                | <b>Points Count</b>           | <b>Pulse Sequence</b> zgpg30 |                      |
| <b>Solvent</b>                | CHLOROFORM-D                               | <b>Sweep Width (Hz)</b>      | 24154.59             | <b>Temperature (degree C)</b> | 27.000                       |                      |

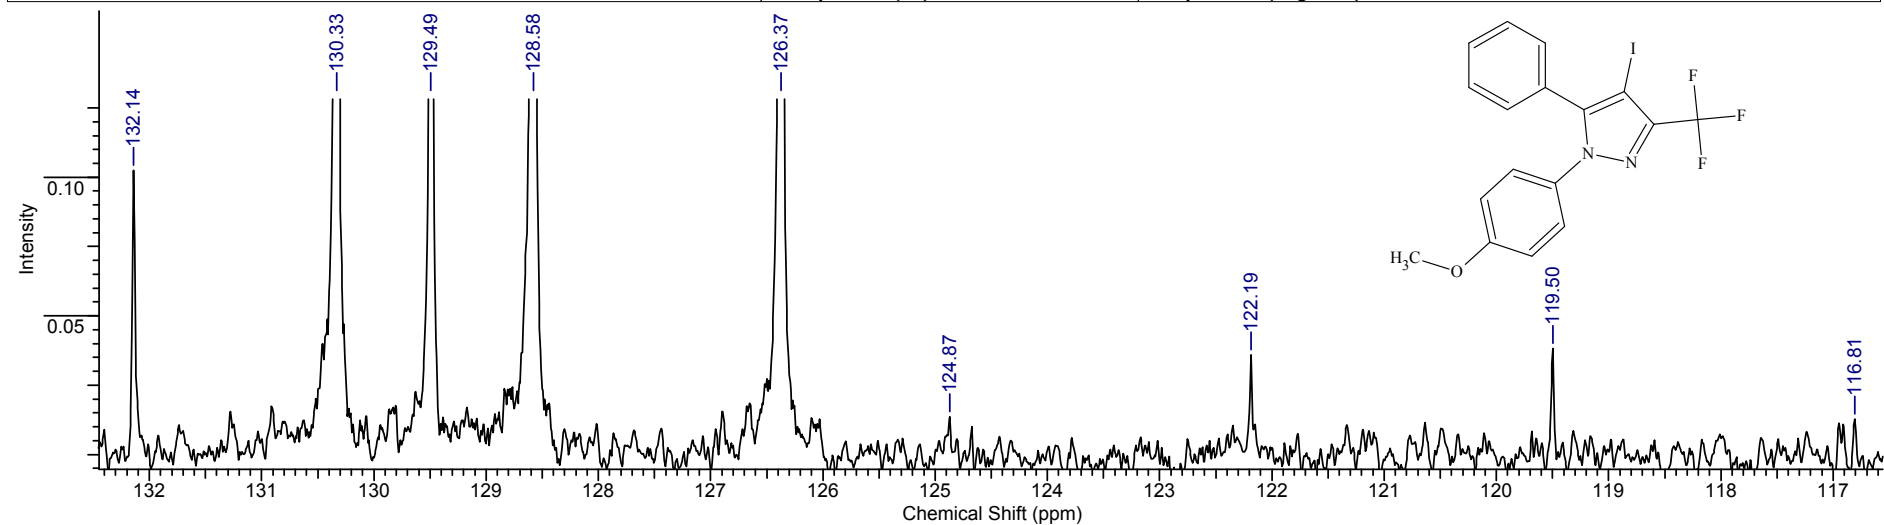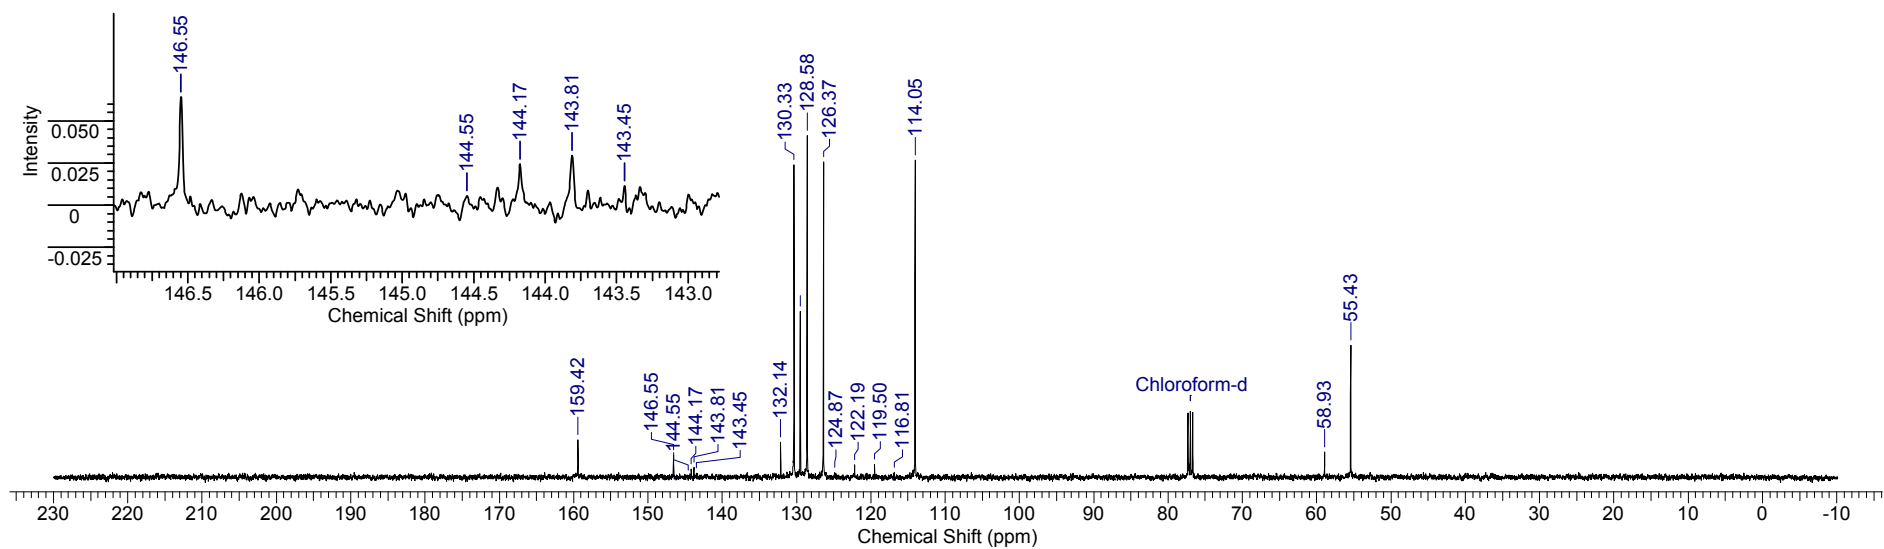

<sup>13</sup>C NMR spectrum of **4e** (100.6 MHz, CDCl<sub>3</sub>)

|           |          |                |                                                                  |
|-----------|----------|----------------|------------------------------------------------------------------|
| <b>FW</b> | 444.1897 | <b>Formula</b> | C <sub>17</sub> H <sub>12</sub> F <sub>3</sub> IN <sub>2</sub> O |
|-----------|----------|----------------|------------------------------------------------------------------|

|                               |          |                               |             |                             |                                                                               |                              |        |
|-------------------------------|----------|-------------------------------|-------------|-----------------------------|-------------------------------------------------------------------------------|------------------------------|--------|
| <b>Acquisition Time (sec)</b> | 1.5000   | <b>Date</b>                   | May 31 2017 | <b>File Name</b>            | D:\BN\Docs (BN)\vasily\SPEC_BM_F\2017.06.03_F\BM-1090_20170531_01\FLUORINE_01 |                              |        |
| <b>Frequency (MHz)</b>        | 376.31   | <b>Nucleus</b>                | 19F         | <b>Number of Transients</b> | 16                                                                            | <b>Original Points Count</b> | 133929 |
| <b>Points Count</b>           | 262144   | <b>Pulse Sequence</b>         | s2pul       | <b>Solvent</b>              | CHLOROFORM-D                                                                  |                              |        |
| <b>Sweep Width (Hz)</b>       | 89285.71 | <b>Temperature (degree C)</b> | 25.000      |                             |                                                                               |                              |        |

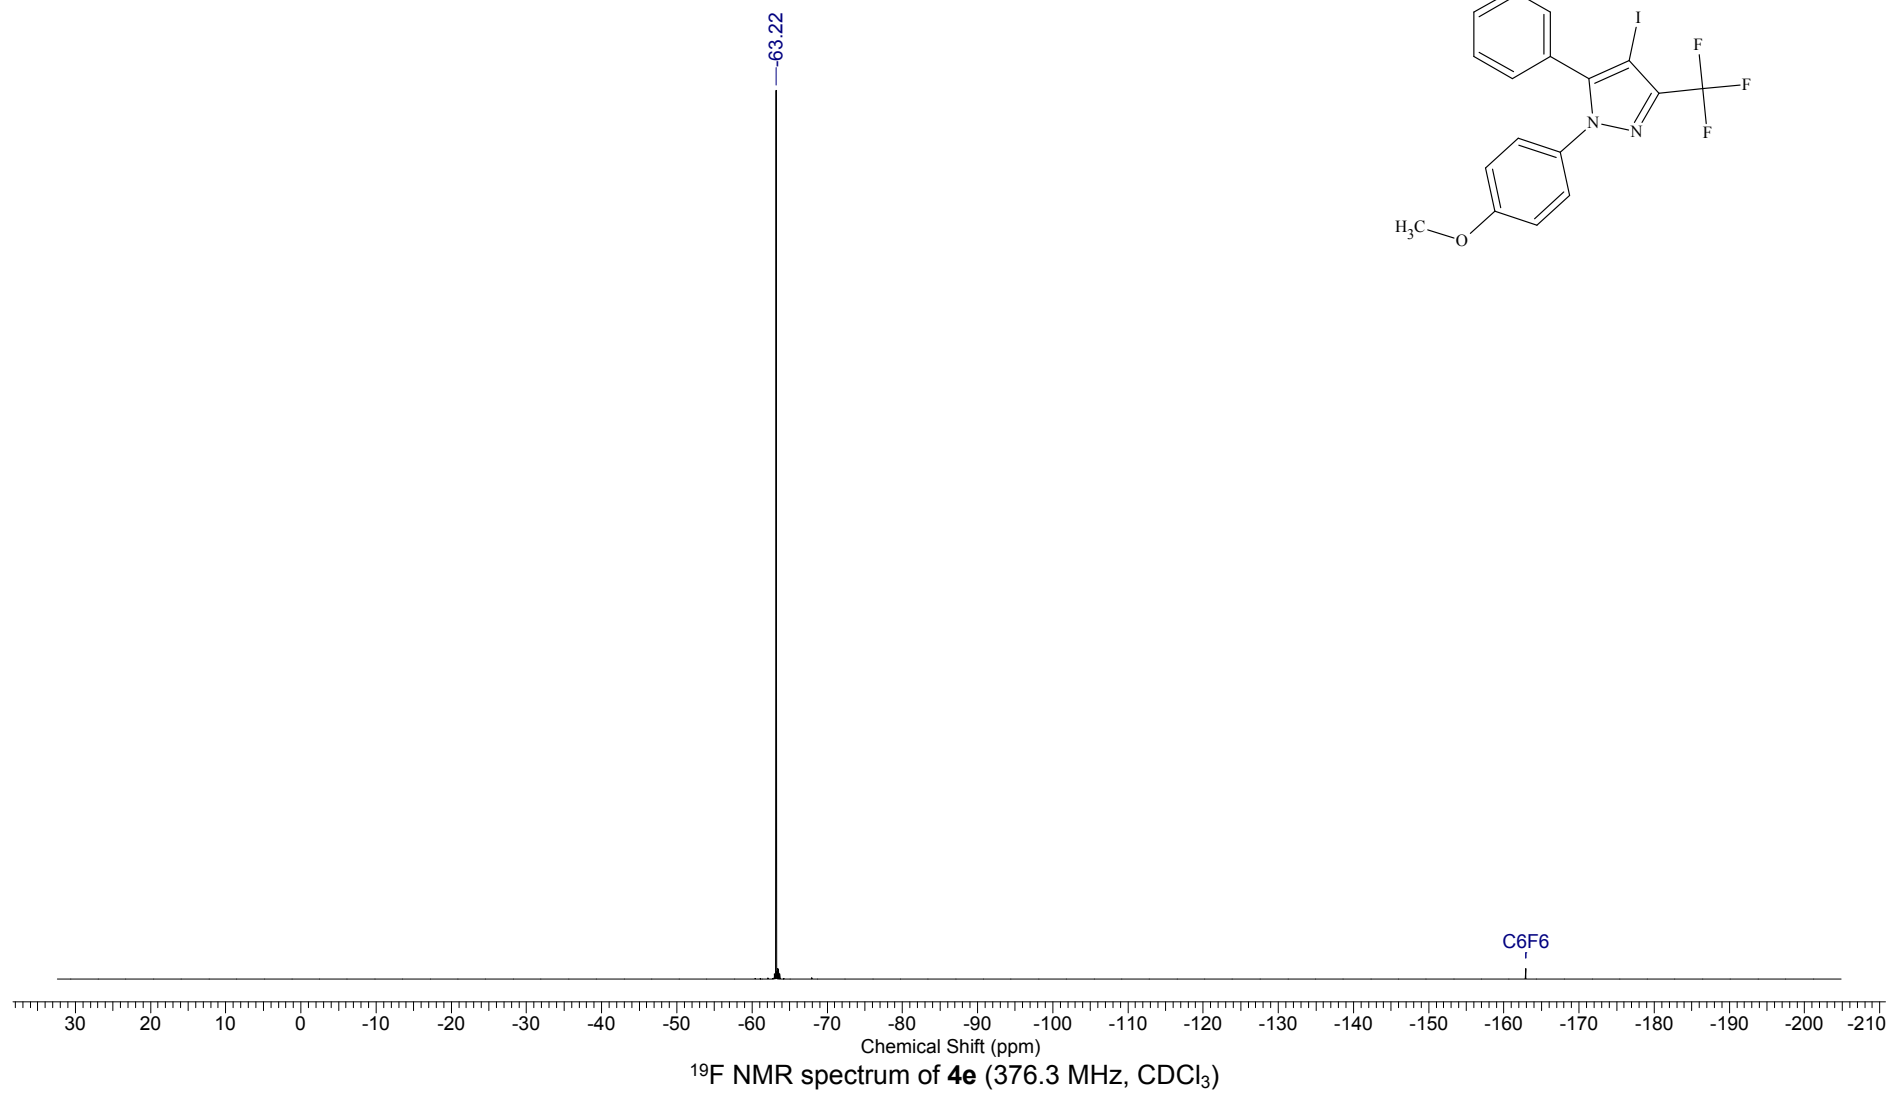



|           |          |                |                                                                               |
|-----------|----------|----------------|-------------------------------------------------------------------------------|
| <b>FW</b> | 483.0533 | <b>Formula</b> | C <sub>16</sub> H <sub>8</sub> Cl <sub>2</sub> F <sub>3</sub> IN <sub>2</sub> |
|-----------|----------|----------------|-------------------------------------------------------------------------------|

|                               |                                            |                               |                        |                       |                |                      |                             |   |
|-------------------------------|--------------------------------------------|-------------------------------|------------------------|-----------------------|----------------|----------------------|-----------------------------|---|
| <b>Acquisition Time (sec)</b> | 2.5559                                     | <b>Comment</b>                | Imported from UXMNR.   |                       | <b>Date</b>    | 02 Jun 2017 15:15:44 |                             |   |
| <b>File Name</b>              | D:\BN\output\2017\06.epi\BM-1097.H_001001r |                               | <b>Frequency (MHz)</b> | 400.13                | <b>Nucleus</b> | 1H                   | <b>Number of Transients</b> | 4 |
| <b>Original Points Count</b>  | 16384                                      | <b>Points Count</b>           | 65536                  | <b>Pulse Sequence</b> | zg30           | <b>Solvent</b>       | CHLOROFORM-D                |   |
| <b>Sweep Width (Hz)</b>       | 6410.26                                    | <b>Temperature (degree C)</b> | 27.000                 |                       |                |                      |                             |   |

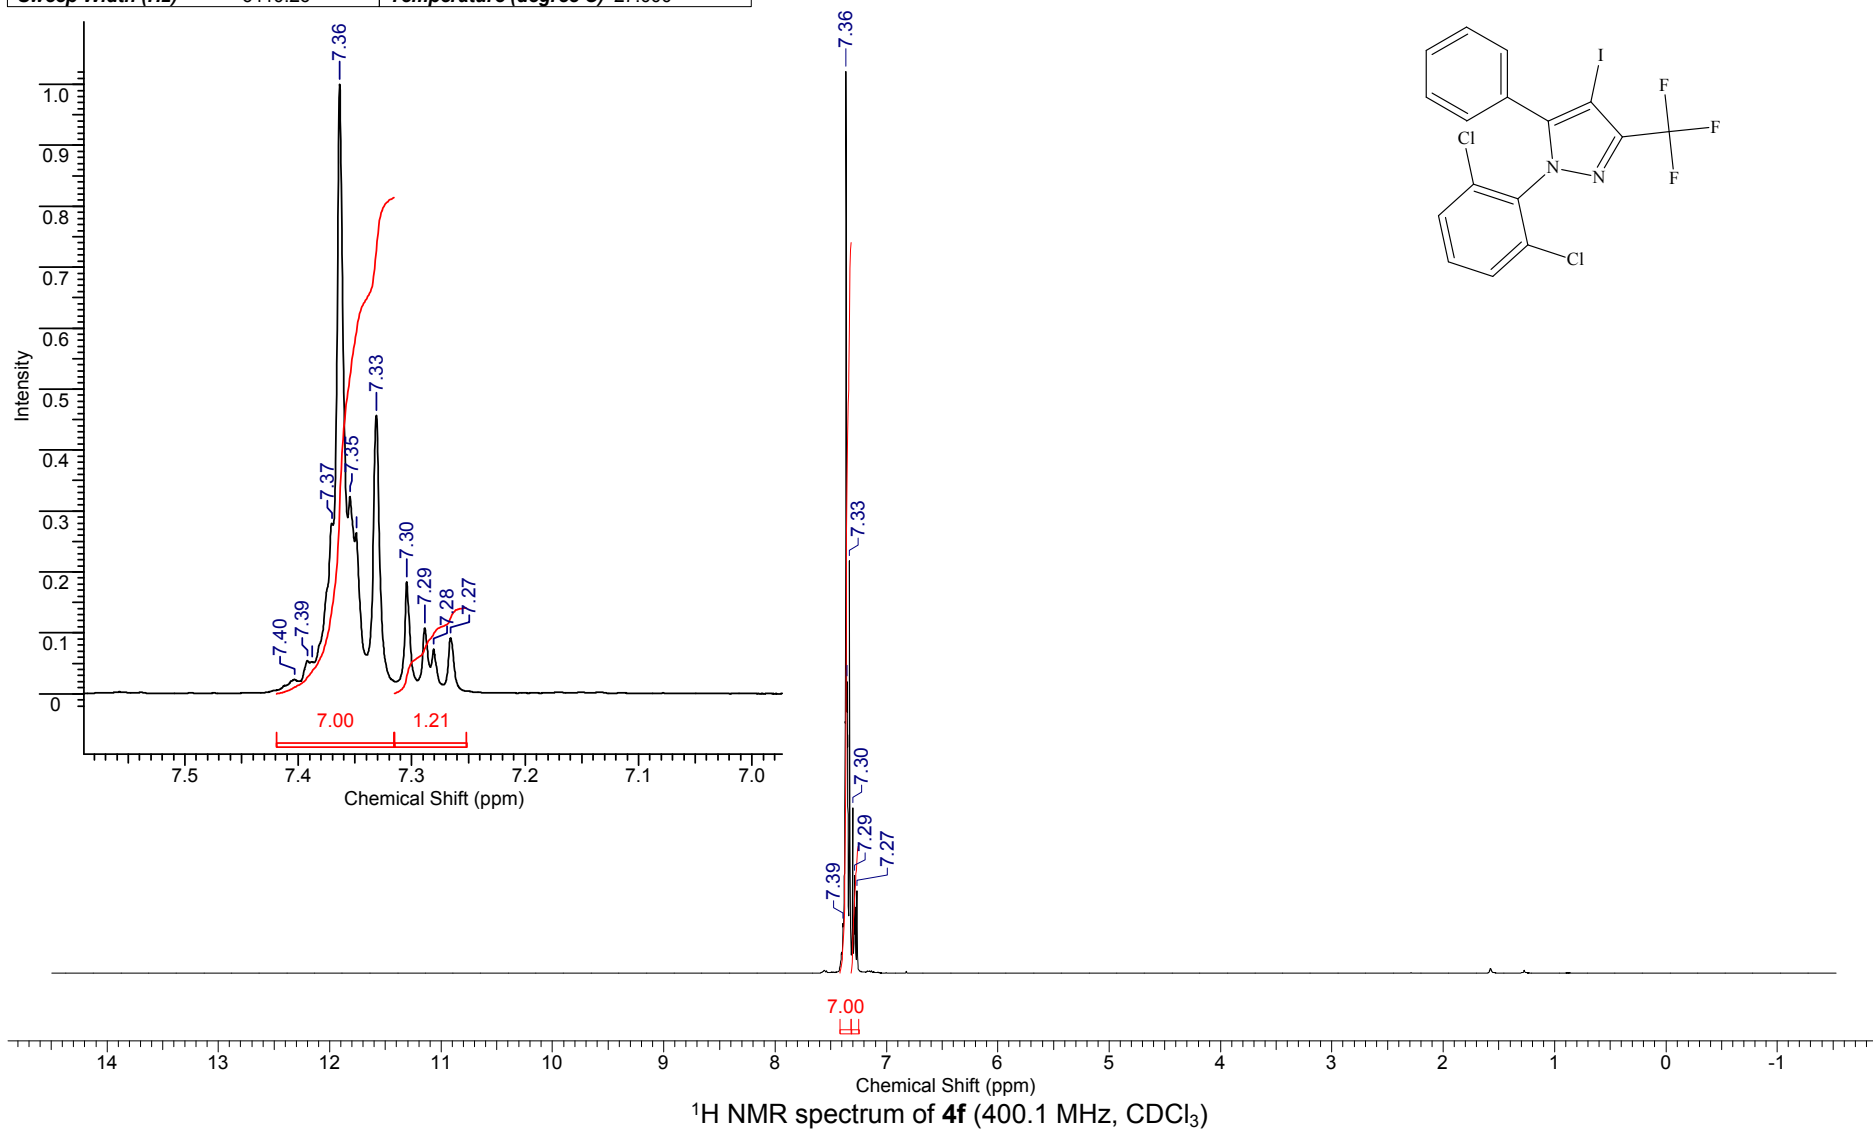

|           |          |                |                                                                               |
|-----------|----------|----------------|-------------------------------------------------------------------------------|
| <b>FW</b> | 483.0533 | <b>Formula</b> | C <sub>16</sub> H <sub>8</sub> Cl <sub>2</sub> F <sub>3</sub> IN <sub>2</sub> |
|-----------|----------|----------------|-------------------------------------------------------------------------------|

|                               |                                            |                              |                      |                               |                      |
|-------------------------------|--------------------------------------------|------------------------------|----------------------|-------------------------------|----------------------|
| <b>Acquisition Time (sec)</b> | 0.4999                                     | <b>Comment</b>               | Imported from UXMNR. | <b>Date</b>                   | 02 Jun 2017 15:20:22 |
| <b>File Name</b>              | D:\BN\output\2017\06.epi\BM-1097.C_002001r | <b>Frequency (MHz)</b>       | 100.61               | <b>Nucleus</b>                | 13C                  |
| <b>Number of Transients</b>   | 152                                        | <b>Original Points Count</b> | 12076                | <b>Points Count</b>           | 65536                |
| <b>Solvent</b>                | CHLOROFORM-D                               | <b>Sweep Width (Hz)</b>      | 24154.59             | <b>Pulse Sequence</b>         | zgpg30               |
|                               |                                            |                              |                      | <b>Temperature (degree C)</b> | 27.000               |

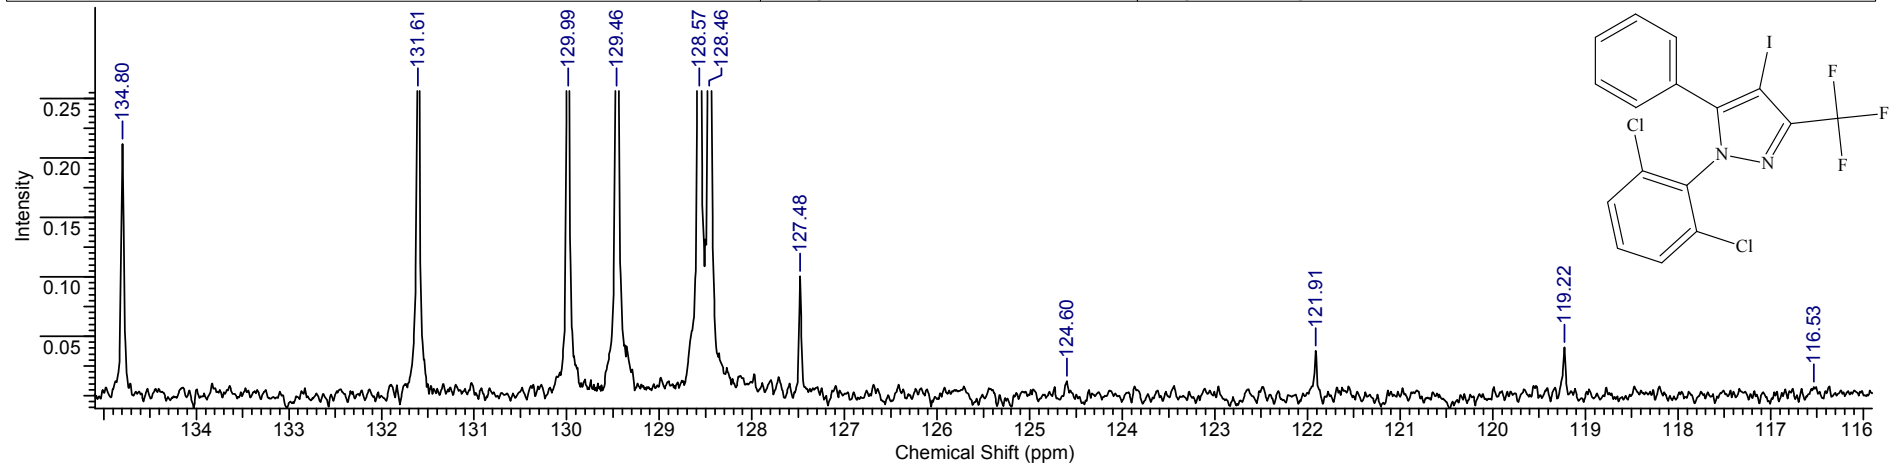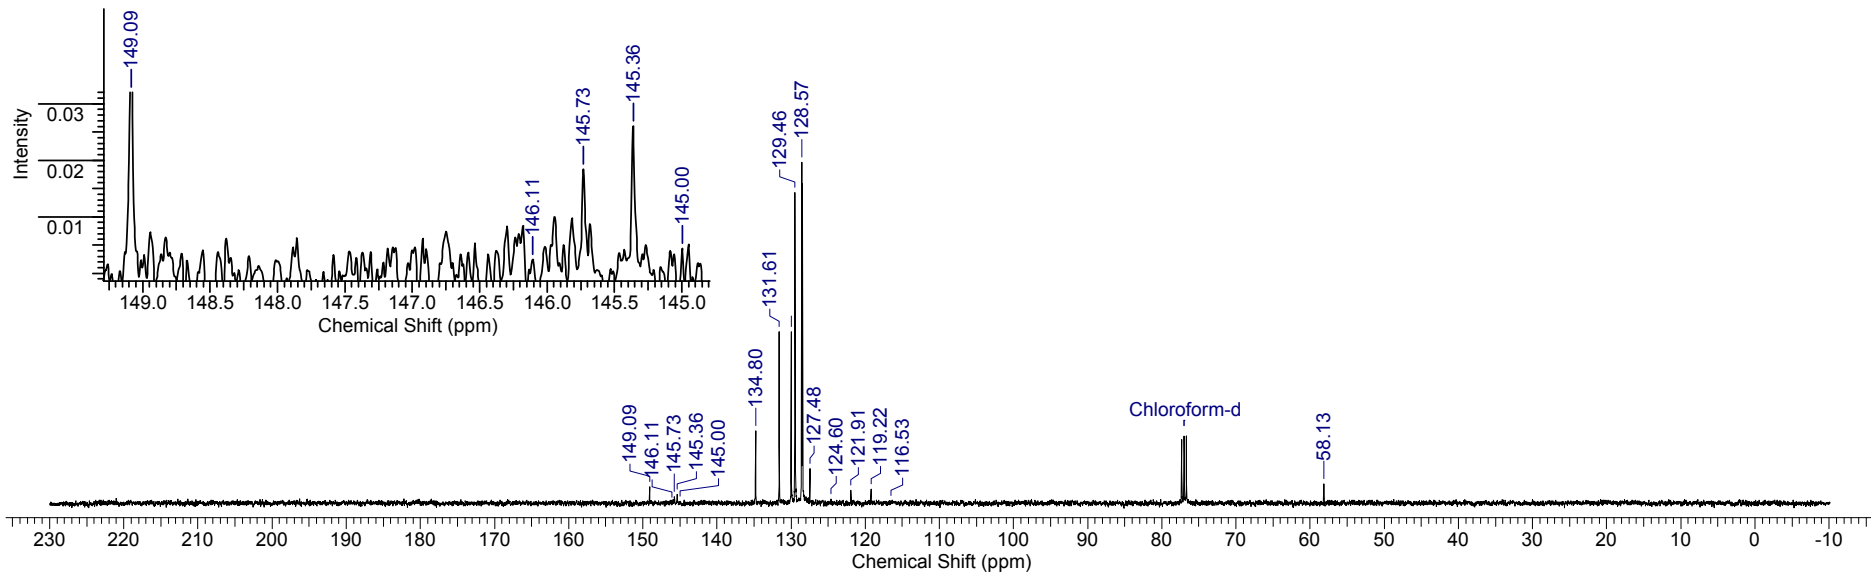

<sup>13</sup>C NMR spectrum of **4f** (100.6 MHz, CDCl<sub>3</sub>)

|                    |                                                                                              |
|--------------------|----------------------------------------------------------------------------------------------|
| <b>FW</b> 483.0533 | <b>Formula</b> C <sub>16</sub> H <sub>8</sub> Cl <sub>2</sub> F <sub>3</sub> IN <sub>2</sub> |
|--------------------|----------------------------------------------------------------------------------------------|

|                                      |                                      |                                                                                     |                                    |
|--------------------------------------|--------------------------------------|-------------------------------------------------------------------------------------|------------------------------------|
| <b>Acquisition Time (sec)</b> 0.7340 | <b>Date</b> Jun 7 2017               | <b>File Name</b> D:\BN\output\F19\F_2017\2017.06.07\BM-1097_20170607_01\FLUORINE_01 |                                    |
| <b>Frequency (MHz)</b> 376.31        | <b>Nucleus</b> 19F                   | <b>Number of Transients</b> 16                                                      | <b>Original Points Count</b> 65536 |
| <b>Points Count</b> 65536            | <b>Pulse Sequence</b> s2pul          | <b>Solvent</b> CHLOROFORM-D                                                         |                                    |
| <b>Sweep Width (Hz)</b> 89285.71     | <b>Temperature (degree C)</b> 25.000 |                                                                                     |                                    |

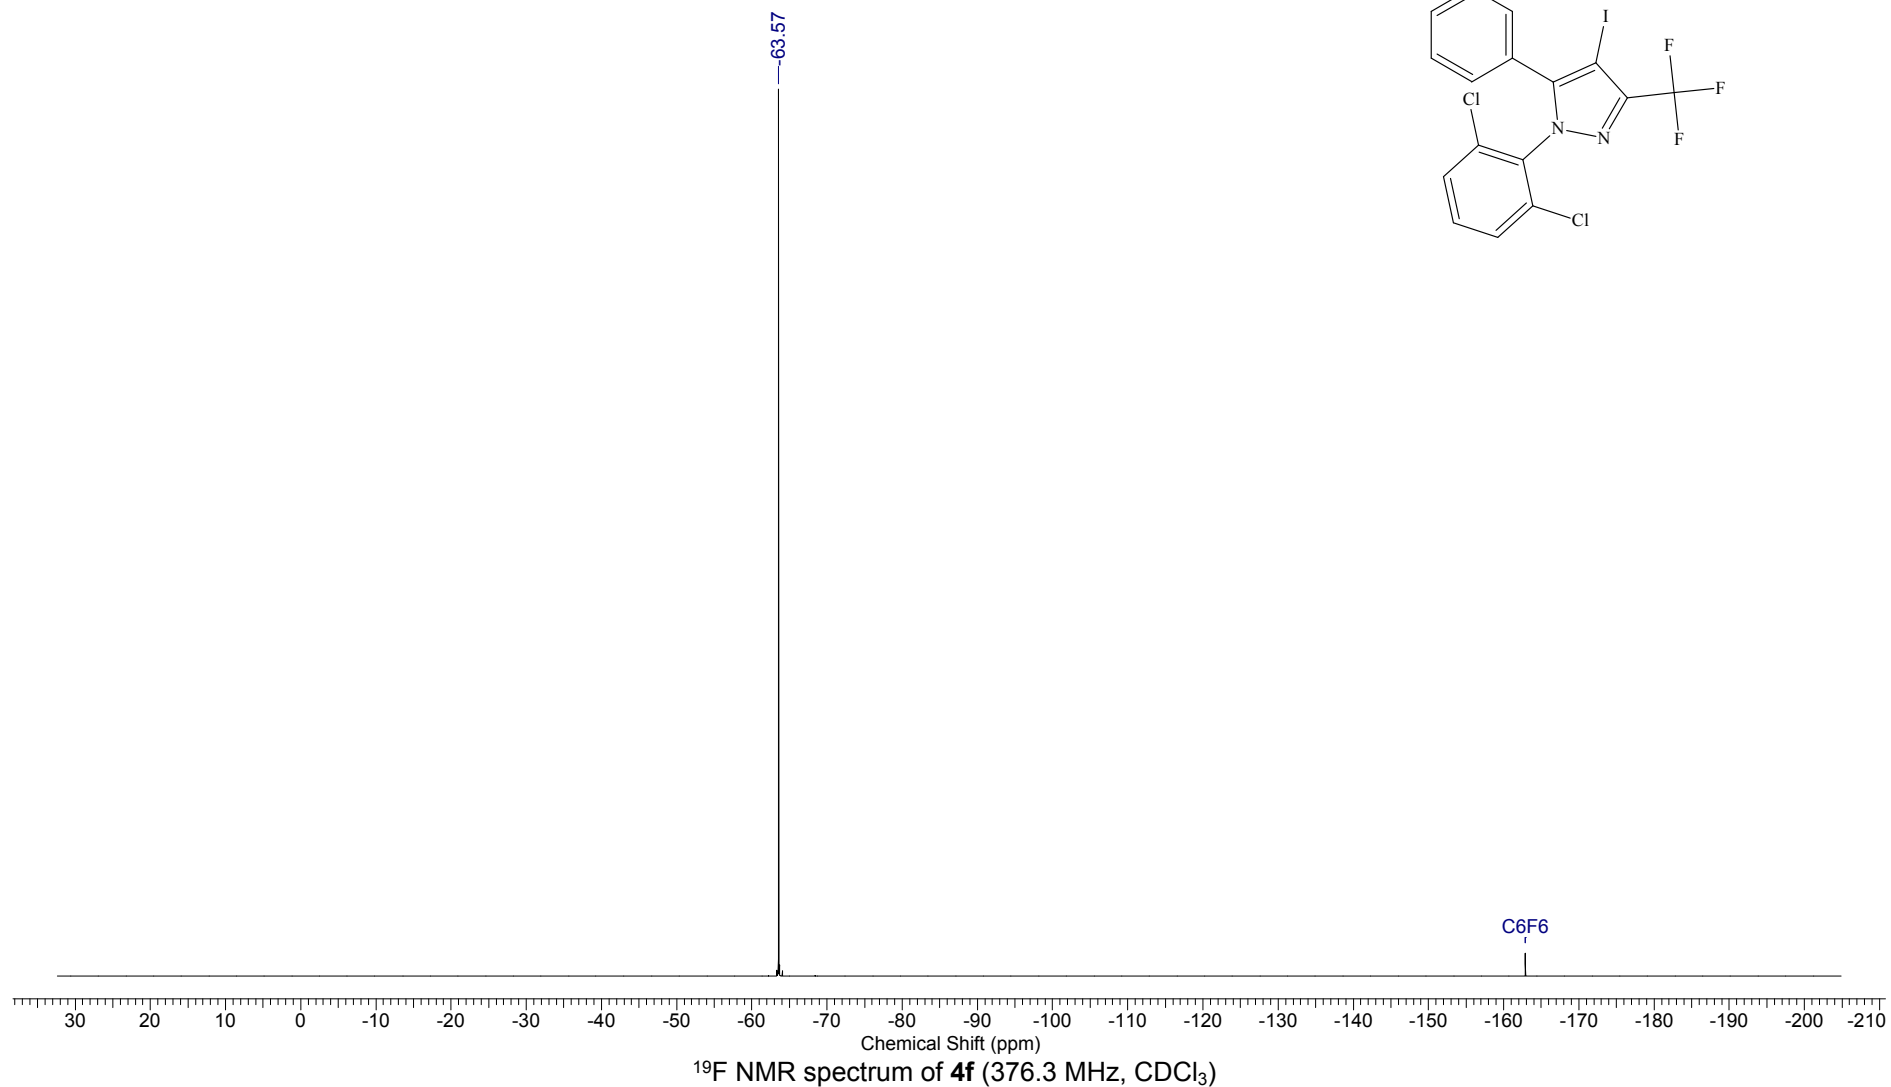

|           |          |                |                                                               |
|-----------|----------|----------------|---------------------------------------------------------------|
| <b>FW</b> | 439.1733 | <b>Formula</b> | C <sub>17</sub> H <sub>9</sub> F <sub>3</sub> IN <sub>3</sub> |
|-----------|----------|----------------|---------------------------------------------------------------|

|                               |                                            |                               |                        |                       |                |                      |                             |   |  |
|-------------------------------|--------------------------------------------|-------------------------------|------------------------|-----------------------|----------------|----------------------|-----------------------------|---|--|
| <b>Acquisition Time (sec)</b> | 2.5559                                     | <b>Comment</b>                | Imported from UXNMR.   |                       | <b>Date</b>    | 03 Jun 2017 13:27:44 |                             |   |  |
| <b>File Name</b>              | D:\BN\output\2017\06.epi\BM-1100.H_001001r |                               | <b>Frequency (MHz)</b> | 400.13                | <b>Nucleus</b> | 1H                   | <b>Number of Transients</b> | 4 |  |
| <b>Original Points Count</b>  | 16384                                      | <b>Points Count</b>           | 65536                  | <b>Pulse Sequence</b> | zg30           | <b>Solvent</b>       | CHLOROFORM-D                |   |  |
| <b>Sweep Width (Hz)</b>       | 6410.26                                    | <b>Temperature (degree C)</b> | 27.000                 |                       |                |                      |                             |   |  |

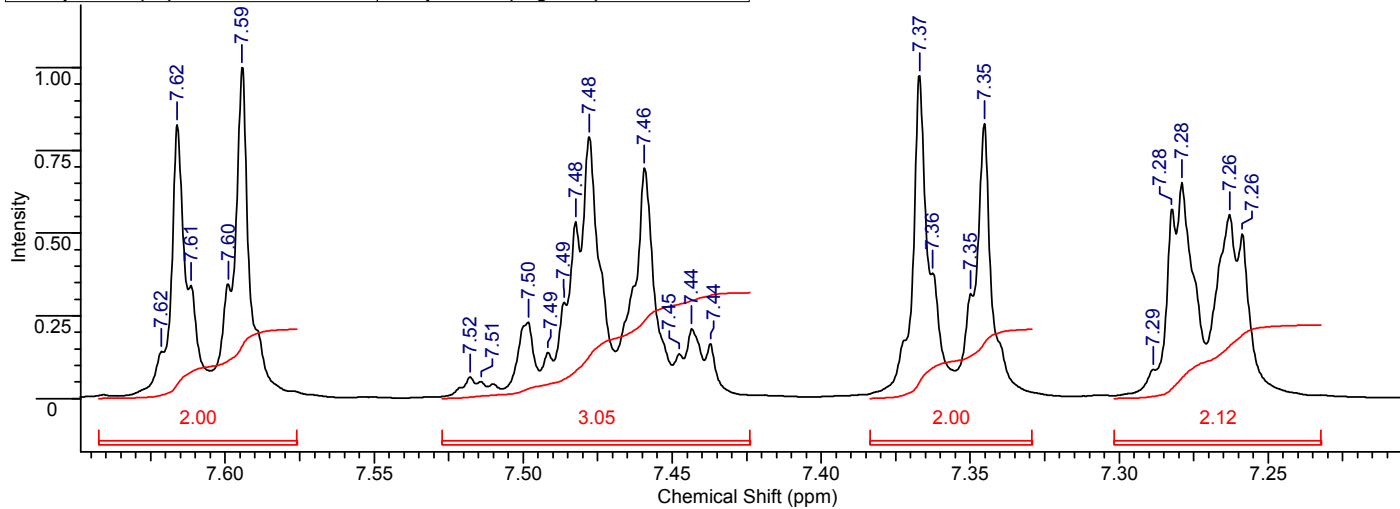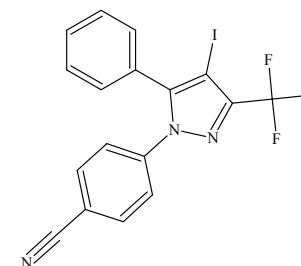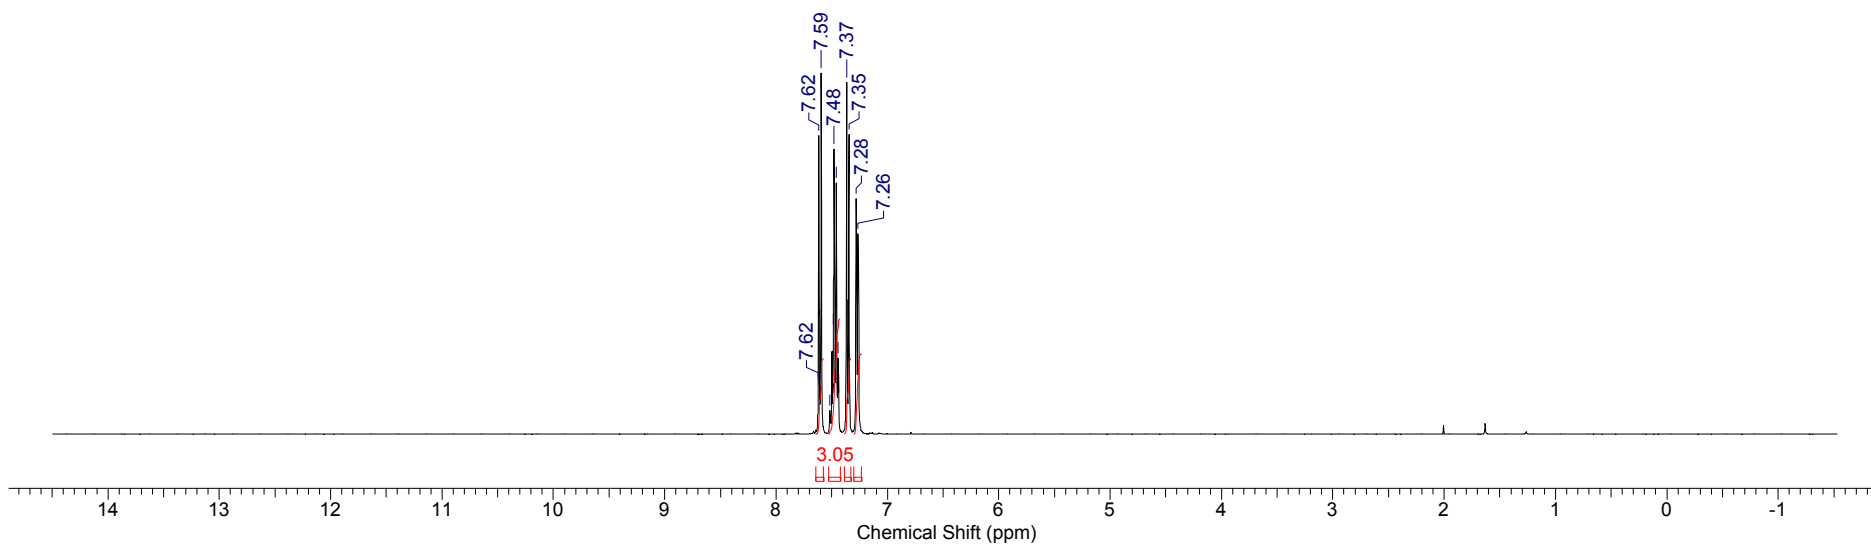

<sup>1</sup>H NMR spectrum of **4g** (400.1 MHz, CDCl<sub>3</sub>)

|           |          |                |                                                               |
|-----------|----------|----------------|---------------------------------------------------------------|
| <b>FW</b> | 439.1733 | <b>Formula</b> | C <sub>17</sub> H <sub>9</sub> F <sub>3</sub> IN <sub>3</sub> |
|-----------|----------|----------------|---------------------------------------------------------------|

|                               |                                            |                              |                      |                               |                      |
|-------------------------------|--------------------------------------------|------------------------------|----------------------|-------------------------------|----------------------|
| <b>Acquisition Time (sec)</b> | 0.4999                                     | <b>Comment</b>               | Imported from UXMNR. | <b>Date</b>                   | 03 Jun 2017 13:30:48 |
| <b>File Name</b>              | D:\BN\output\2017\06.epi\BM-1100.C_002001r | <b>Frequency (MHz)</b>       | 100.61               | <b>Nucleus</b>                | <sup>13</sup> C      |
| <b>Number of Transients</b>   | 88                                         | <b>Original Points Count</b> | 12076                | <b>Points Count</b>           | 65536                |
| <b>Solvent</b>                | CHLOROFORM-D                               | <b>Sweep Width (Hz)</b>      | 24154.59             | <b>Pulse Sequence</b>         | zgpg30               |
|                               |                                            |                              |                      | <b>Temperature (degree C)</b> | 27.000               |

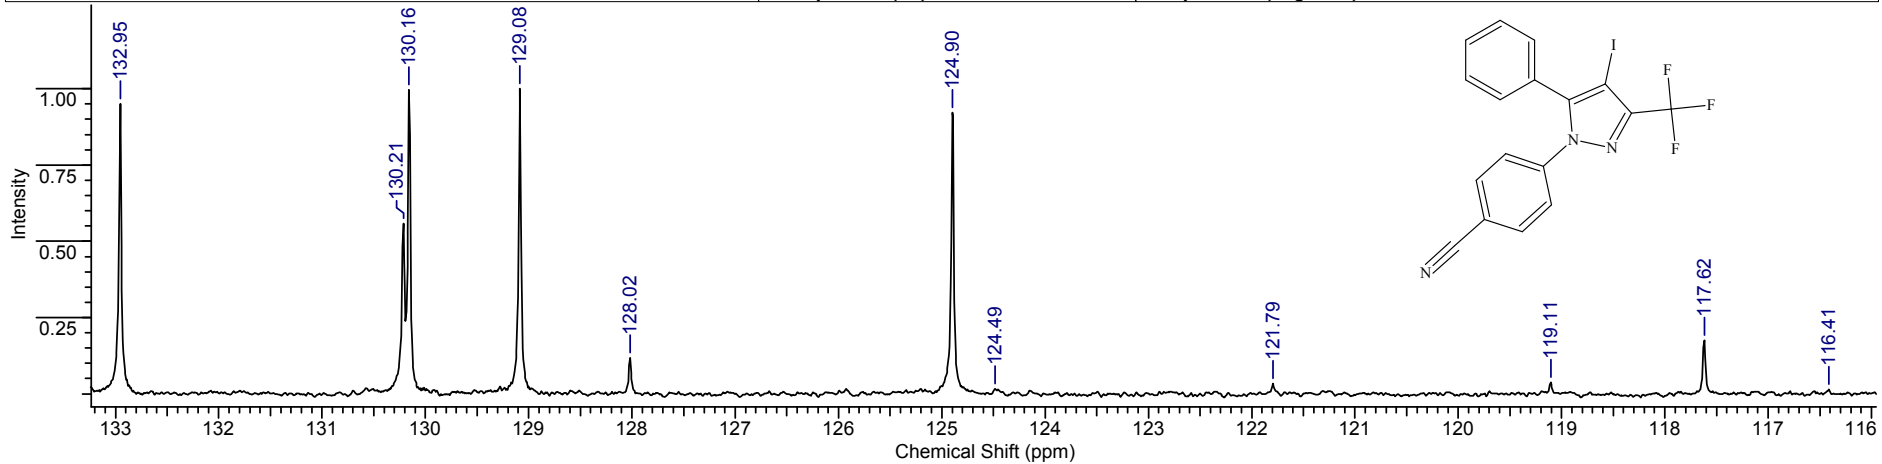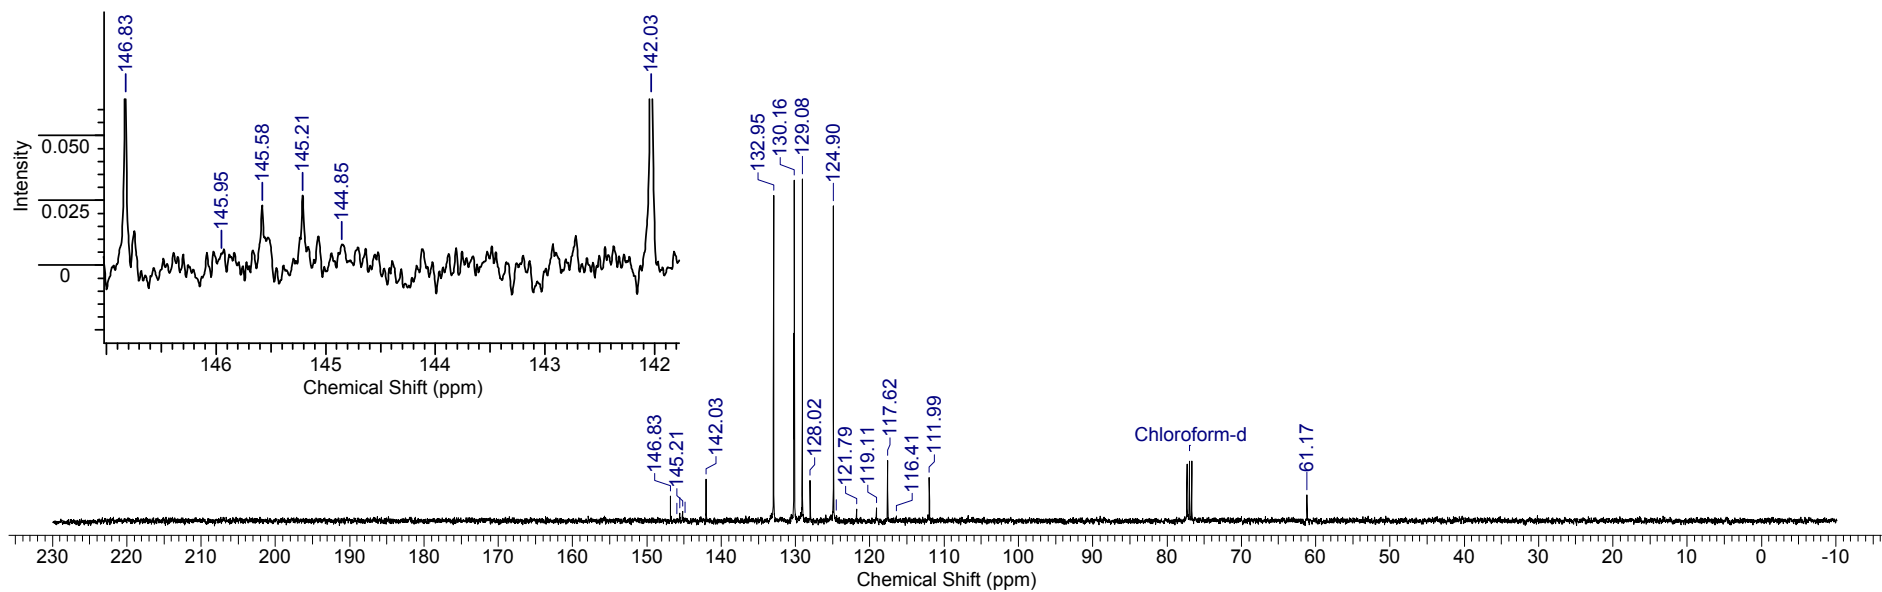

<sup>13</sup>C NMR spectrum of **4g** (100.6 MHz, CDCl<sub>3</sub>)

|           |          |                |                                                               |
|-----------|----------|----------------|---------------------------------------------------------------|
| <b>FW</b> | 439.1733 | <b>Formula</b> | C <sub>17</sub> H <sub>9</sub> F <sub>3</sub> IN <sub>3</sub> |
|-----------|----------|----------------|---------------------------------------------------------------|

|                               |          |                               |            |                             |                                                                      |                              |        |
|-------------------------------|----------|-------------------------------|------------|-----------------------------|----------------------------------------------------------------------|------------------------------|--------|
| <b>Acquisition Time (sec)</b> | 1.5729   | <b>Date</b>                   | Jun 8 2017 | <b>File Name</b>            | D:\BN\output\F19\F_2017\2017.06.08\BM-1100-F_20170608_01\FLUORINE_01 |                              |        |
| <b>Frequency (MHz)</b>        | 376.31   | <b>Nucleus</b>                | 19F        | <b>Number of Transients</b> | 8                                                                    | <b>Original Points Count</b> | 140434 |
| <b>Points Count</b>           | 262144   | <b>Pulse Sequence</b>         | s2pul      | <b>Solvent</b>              | CHLOROFORM-D                                                         |                              |        |
| <b>Sweep Width (Hz)</b>       | 89285.71 | <b>Temperature (degree C)</b> | 22.000     |                             |                                                                      |                              |        |

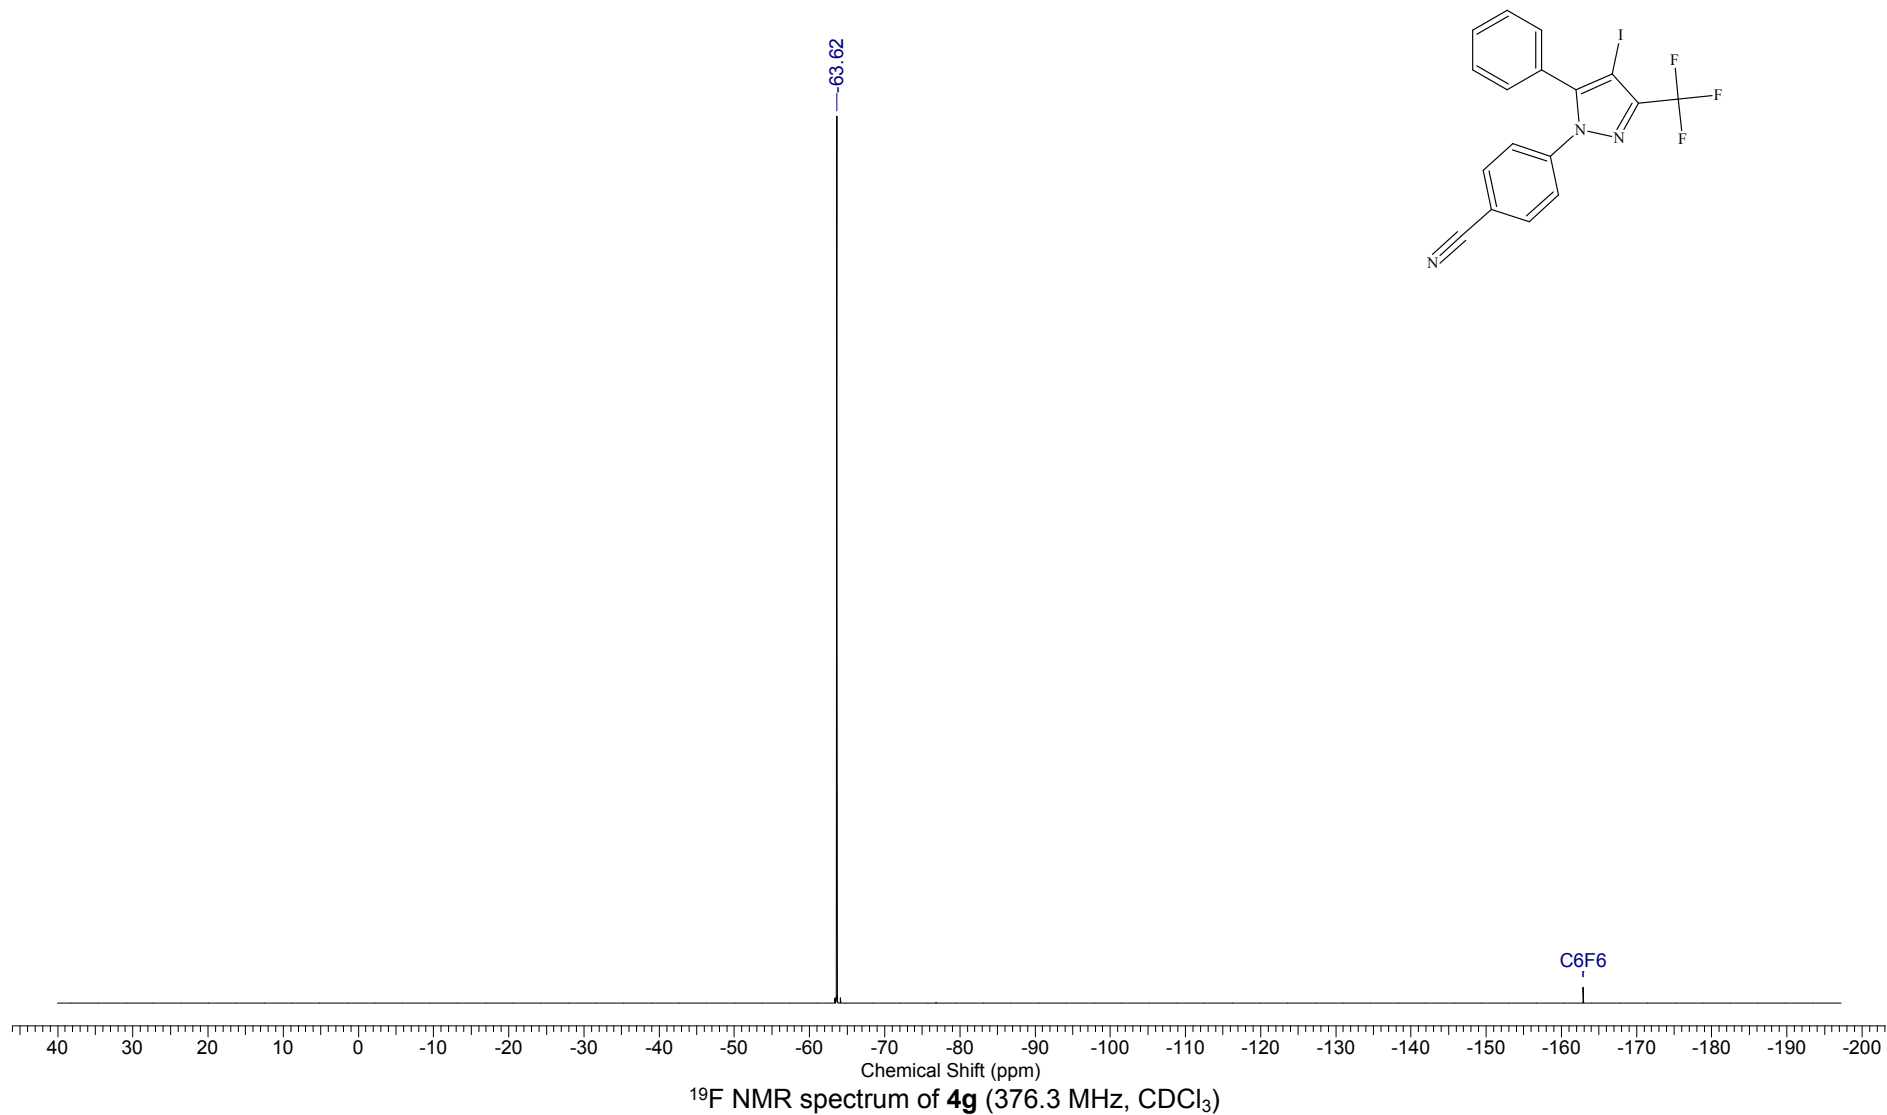

**FW** 504.1590 **Formula** C<sub>16</sub>H<sub>8</sub>F<sub>3</sub>N<sub>4</sub>O<sub>4</sub>

|                               |                                                                         |                             |                      |                              |                      |
|-------------------------------|-------------------------------------------------------------------------|-----------------------------|----------------------|------------------------------|----------------------|
| <b>Acquisition Time (sec)</b> | 2.5559                                                                  | <b>Comment</b>              | Imported from UXNMR. | <b>Date</b>                  | 11 Oct 2016 14:34:06 |
| <b>File Name</b>              | C:\BM_DATA\DOCS\Manuscr_UltraIodo_Pyrazoles\BM-943,946\BM-946.H_001001r |                             |                      | <b>Frequency (MHz)</b>       | 400.13               |
| <b>Nucleus</b>                | 1H                                                                      | <b>Number of Transients</b> | 4                    | <b>Original Points Count</b> | 16384                |
| <b>Pulse Sequence</b>         | zg30                                                                    | <b>Solvent</b>              | CHLOROFORM-D         | <b>Points Count</b>          | 65536                |
| <b>Temperature (degree C)</b> | 27.000                                                                  |                             |                      | <b>Sweep Width (Hz)</b>      | 6410.26              |

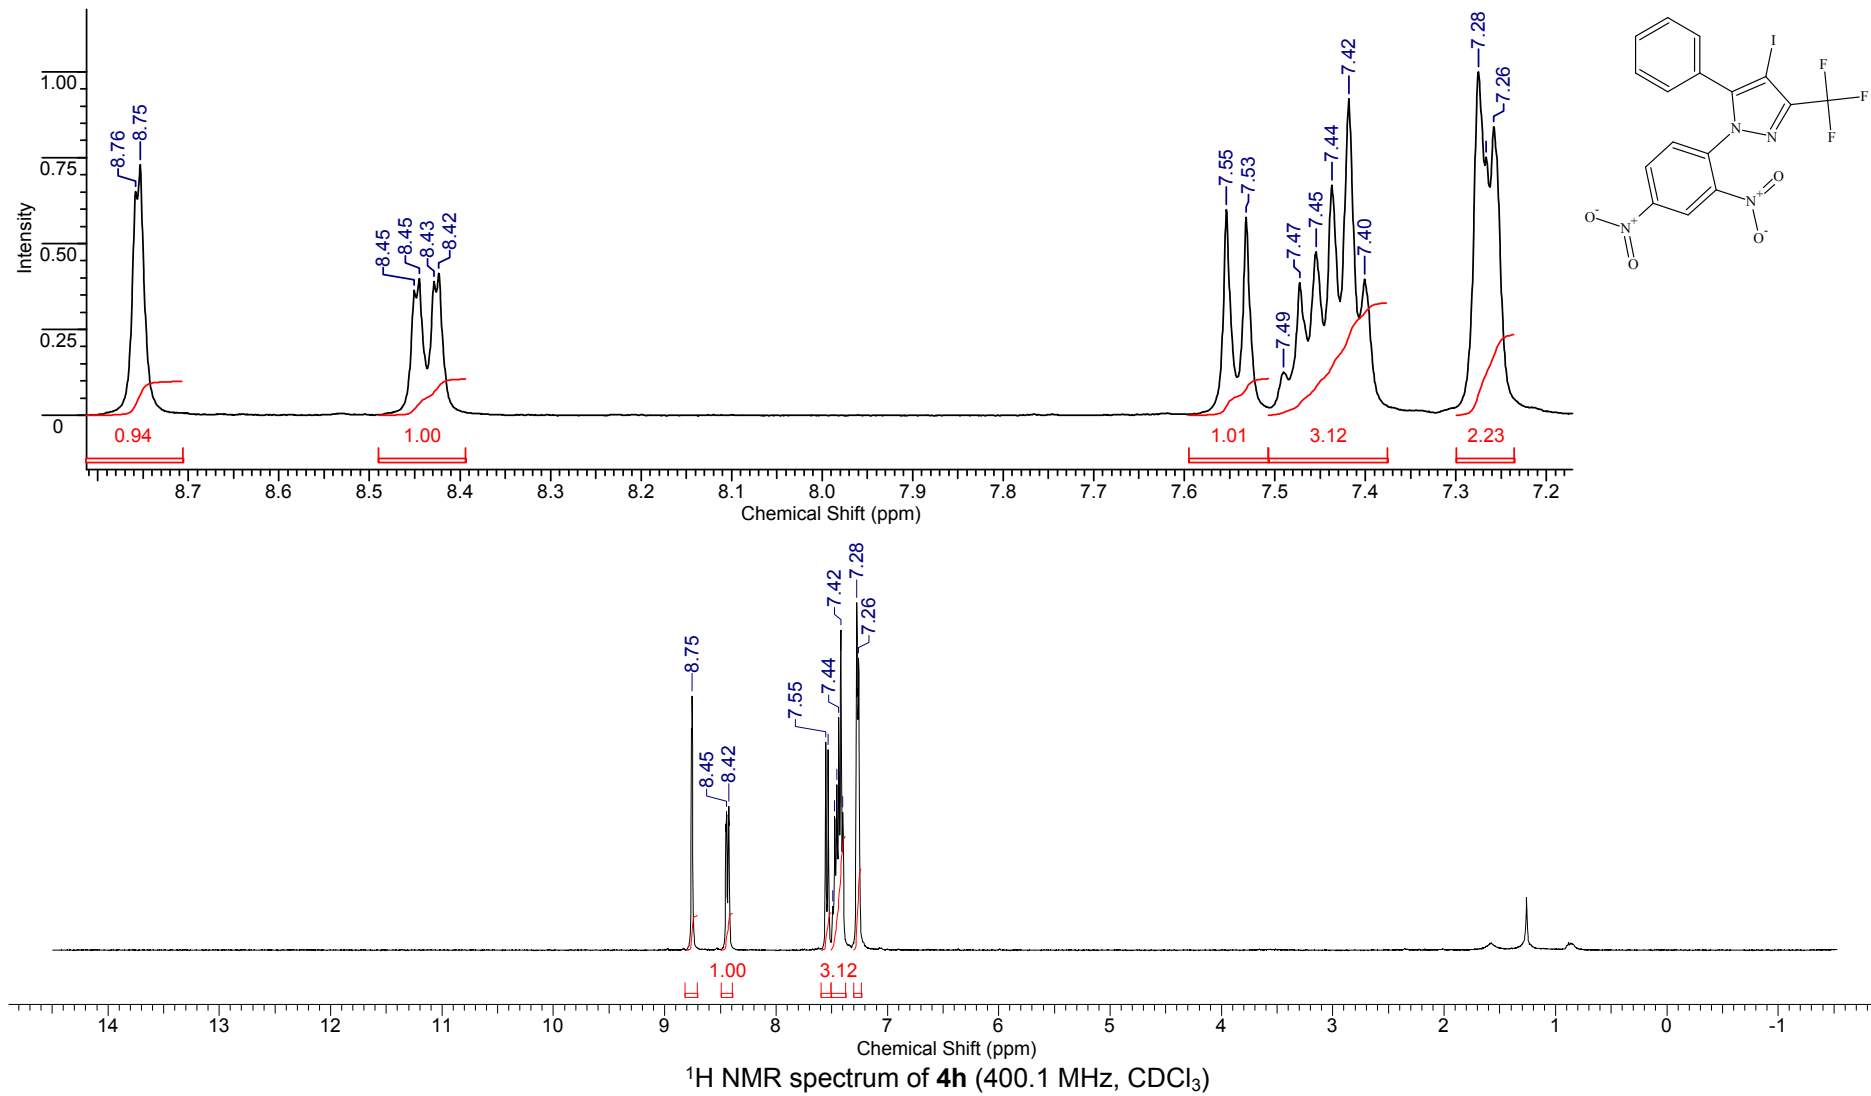

**FW** 504.1590 **Formula** C<sub>16</sub>H<sub>8</sub>F<sub>3</sub>I<sub>2</sub>N<sub>4</sub>O<sub>4</sub>

|                               |                                                                         |                             |                      |                              |                        |                               |        |
|-------------------------------|-------------------------------------------------------------------------|-----------------------------|----------------------|------------------------------|------------------------|-------------------------------|--------|
| <b>Acquisition Time (sec)</b> | 0.4999                                                                  | <b>Comment</b>              | Imported from UXNMR. |                              | <b>Date</b>            | 11 Oct 2016 14:41:26          |        |
| <b>File Name</b>              | C:\BM_DATA\DOCS\Manuscr_UltraIodo_Pyrazoles\BM-943,946\BM-946.C_002001r |                             |                      |                              | <b>Frequency (MHz)</b> | 100.61                        |        |
| <b>Nucleus</b>                | <sup>13</sup> C                                                         | <b>Number of Transients</b> | 256                  | <b>Original Points Count</b> | 12076                  | <b>Points Count</b>           | 65536  |
| <b>Pulse Sequence</b>         | zgpg30                                                                  | <b>Solvent</b>              | DMSO-D6              | <b>Sweep Width (Hz)</b>      | 24154.59               | <b>Temperature (degree C)</b> | 27.000 |

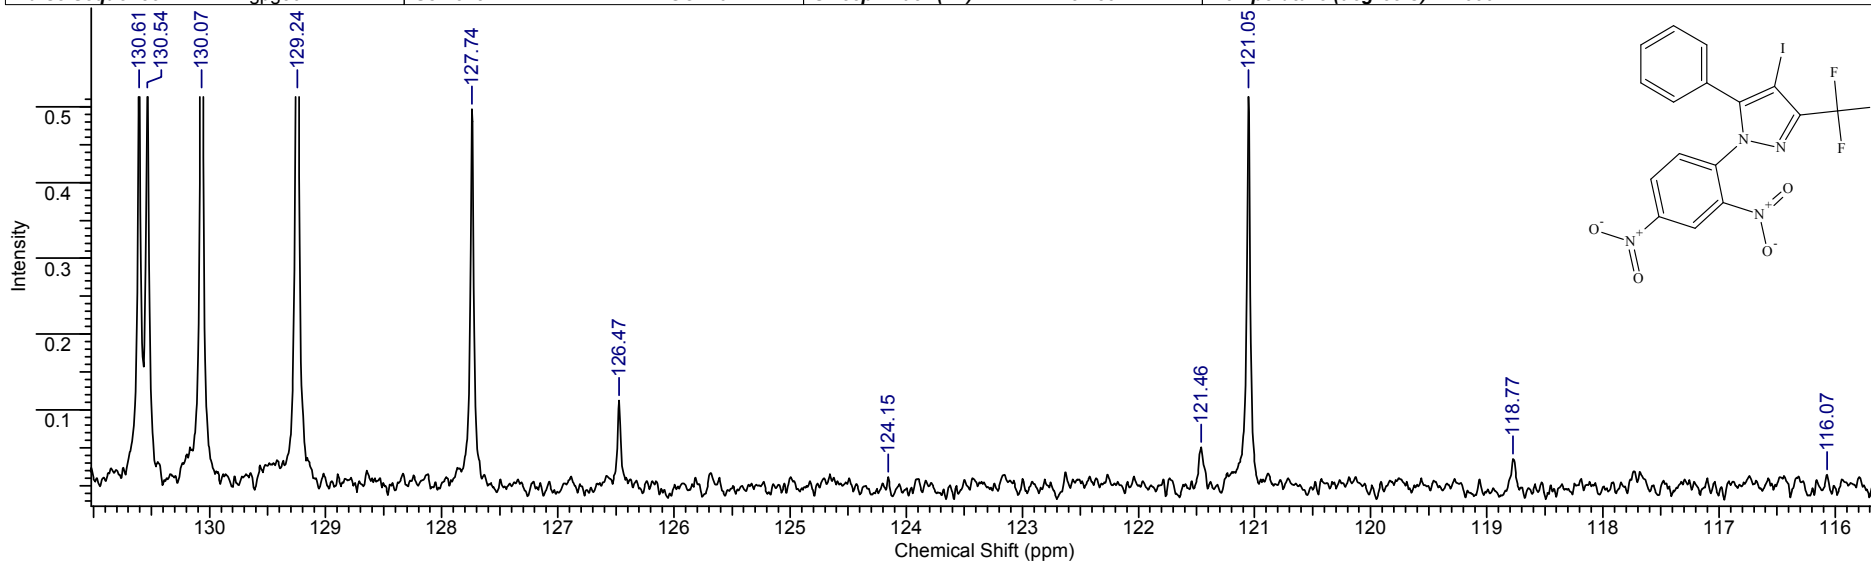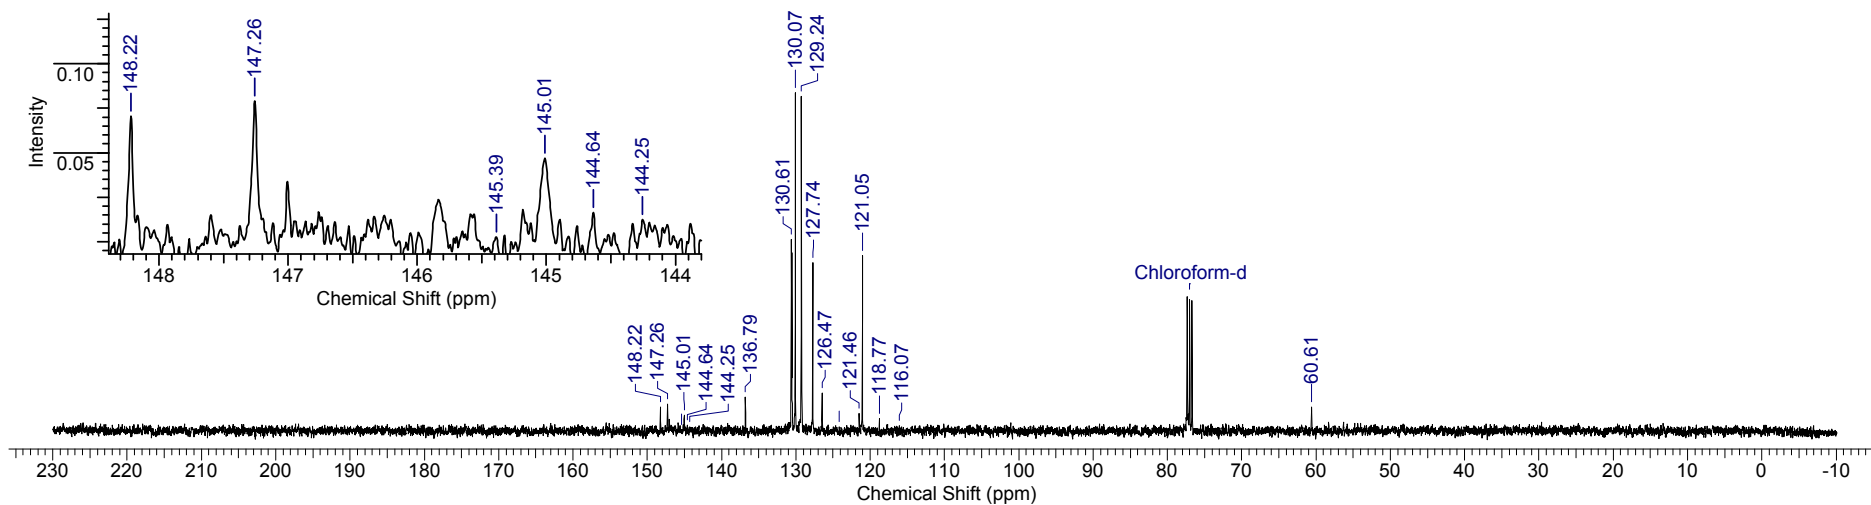

<sup>13</sup>C NMR spectrum of **4h** (100.6 MHz, CDCl<sub>3</sub>)



|           |          |                |                                                                                            |
|-----------|----------|----------------|--------------------------------------------------------------------------------------------|
| <b>FW</b> | 504.1590 | <b>Formula</b> | C <sub>16</sub> H <sub>8</sub> F <sub>3</sub> I <sub>1</sub> N <sub>4</sub> O <sub>4</sub> |
|-----------|----------|----------------|--------------------------------------------------------------------------------------------|

|                               |        |                |                 |                             |                                                       |                               |        |                     |        |
|-------------------------------|--------|----------------|-----------------|-----------------------------|-------------------------------------------------------|-------------------------------|--------|---------------------|--------|
| <b>Acquisition Time (sec)</b> | 1.0000 | <b>Date</b>    | Oct 21 2016     | <b>File Name</b>            | C:\BM_DATA\BM-943,946F\BM-946_20161021_01\FLUORINE_01 |                               |        |                     |        |
| <b>Frequency (MHz)</b>        | 376.31 | <b>Nucleus</b> | <sup>19</sup> F | <b>Number of Transients</b> | 16                                                    | <b>Original Points Count</b>  | 89286  | <b>Points Count</b> | 131072 |
| <b>Pulse Sequence</b>         | s2pul  | <b>Solvent</b> | CHLOROFORM-D    | <b>Sweep Width (Hz)</b>     | 89285.71                                              | <b>Temperature (degree C)</b> | 25.000 |                     |        |

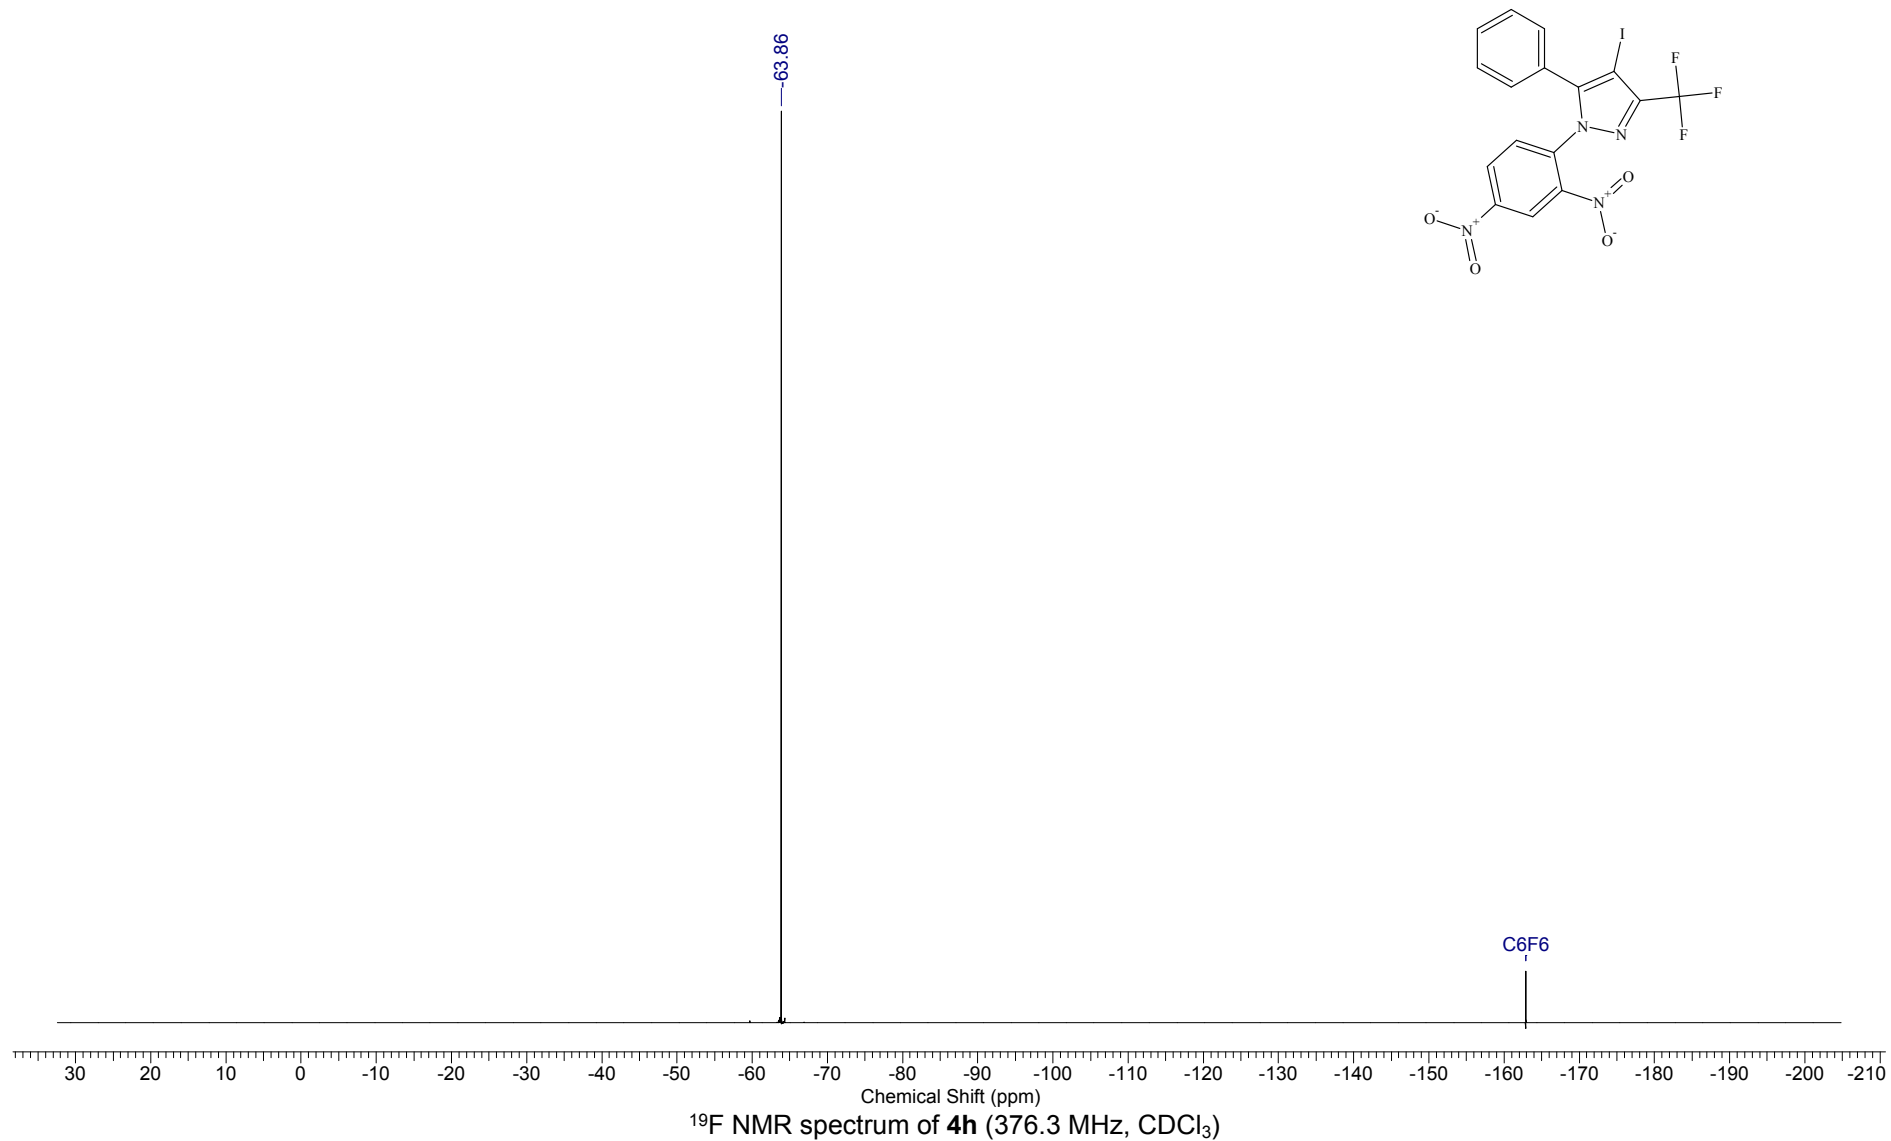

FW 840.3382      Formula  $C_{33}H_{20}F_6I_2N_4$

|                        |                                            |                        |                      |                |      |                      |              |
|------------------------|--------------------------------------------|------------------------|----------------------|----------------|------|----------------------|--------------|
| Acquisition Time (sec) | 2.5559                                     | Comment                | Imported from UXMNR. |                | Date | 31 May 2017 17:39:46 |              |
| File Name              | D:\BN\output\2017\05.i æ\BM-1094.H_001001r | Frequency (MHz)        | 400.13               | Nucleus        | 1H   | Number of Transients | 4            |
| Original Points Count  | 16384                                      | Points Count           | 65536                | Pulse Sequence | zg30 | Solvent              | CHLOROFORM-D |
| Sweep Width (Hz)       | 6410.26                                    | Temperature (degree C) | 27.000               |                |      |                      |              |

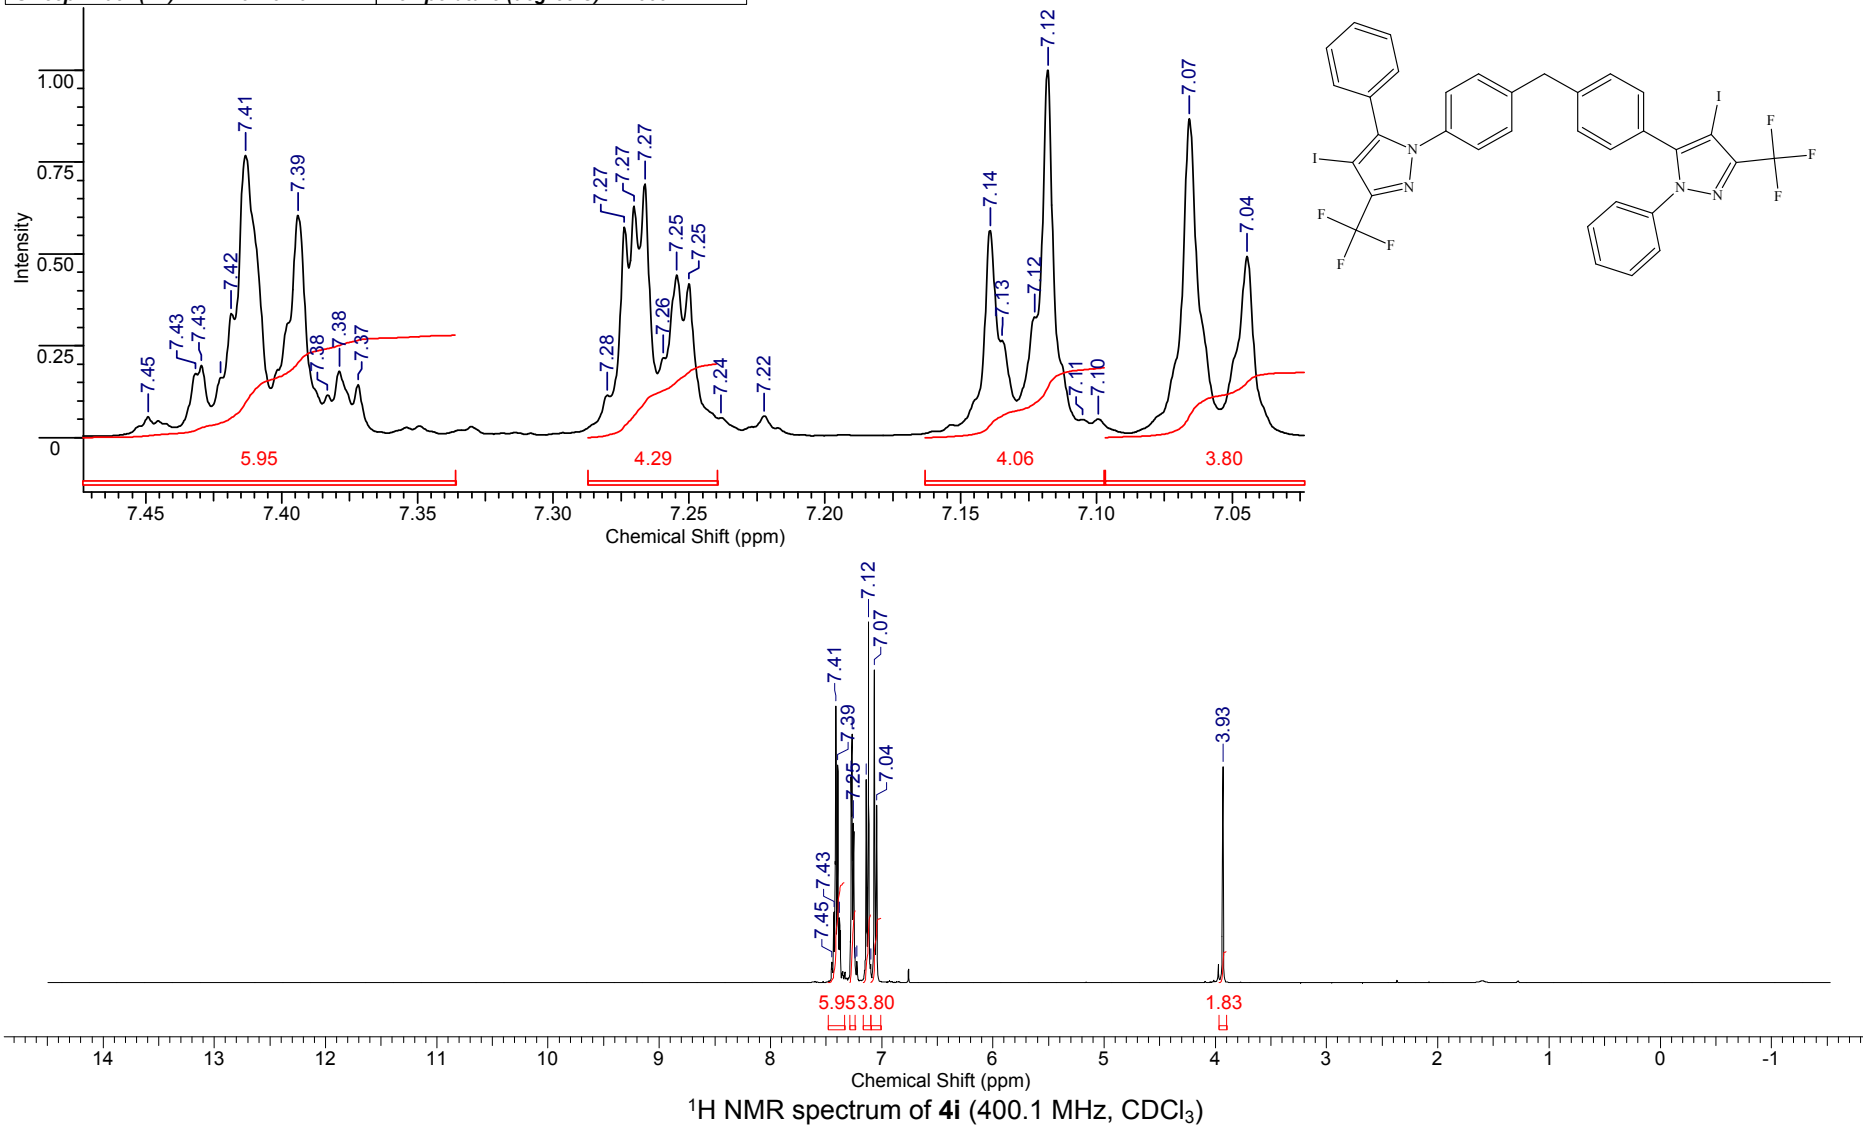

**FW** 840.3382 **Formula** C<sub>33</sub>H<sub>20</sub>F<sub>6</sub>I<sub>2</sub>N<sub>4</sub>

|                               |                                             |                              |                      |                               |             |                      |
|-------------------------------|---------------------------------------------|------------------------------|----------------------|-------------------------------|-------------|----------------------|
| <b>Acquisition Time (sec)</b> | 0.4999                                      | <b>Comment</b>               | Imported from UXMNR. |                               | <b>Date</b> | 31 May 2017 17:43:26 |
| <b>File Name</b>              | D:\BN\output\2017\05.i àé\BM-1094.C_002001r | <b>Frequency (MHz)</b>       | 100.61               | <b>Nucleus</b>                | 13C         |                      |
| <b>Number of Transients</b>   | 64                                          | <b>Original Points Count</b> | 12076                | <b>Points Count</b>           | 65536       |                      |
| <b>Solvent</b>                | CHLOROFORM-D                                | <b>Sweep Width (Hz)</b>      | 24154.59             | <b>Pulse Sequence</b>         | zgpg30      |                      |
|                               |                                             |                              |                      | <b>Temperature (degree C)</b> | 27.000      |                      |

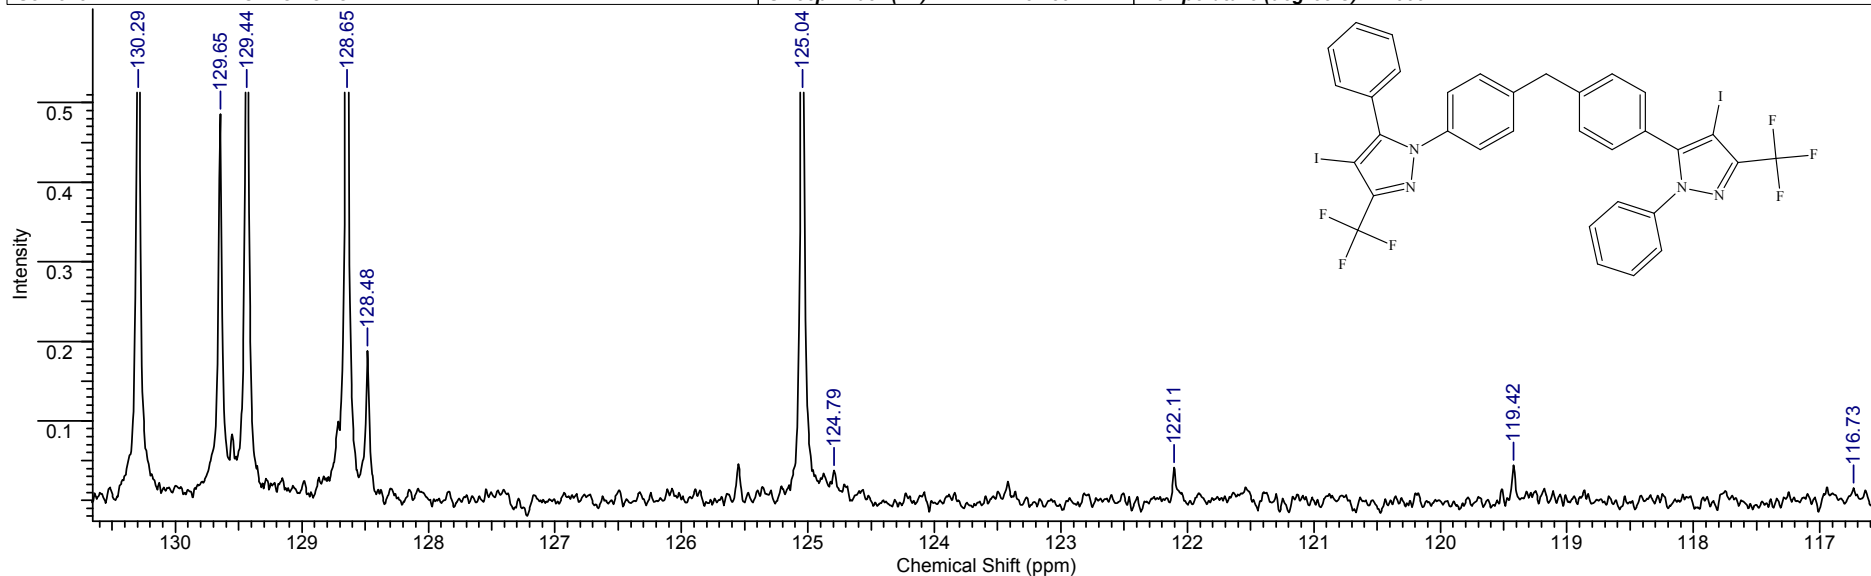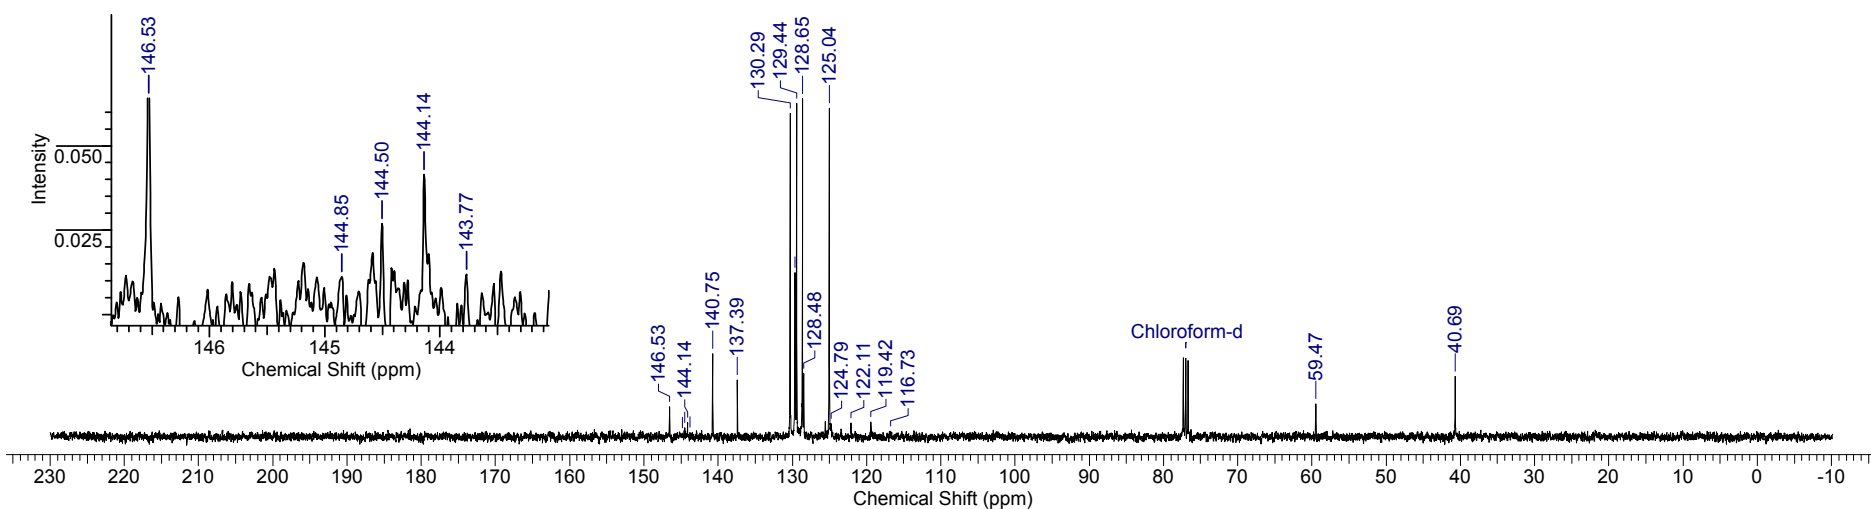

<sup>13</sup>C NMR spectrum of **4i** (100.6 MHz, CDCl<sub>3</sub>)

|           |          |                |                                                                              |
|-----------|----------|----------------|------------------------------------------------------------------------------|
| <b>FW</b> | 840.3382 | <b>Formula</b> | C <sub>33</sub> H <sub>20</sub> F <sub>6</sub> I <sub>2</sub> N <sub>4</sub> |
|-----------|----------|----------------|------------------------------------------------------------------------------|

|                               |          |                               |            |                             |                                                                    |                              |       |
|-------------------------------|----------|-------------------------------|------------|-----------------------------|--------------------------------------------------------------------|------------------------------|-------|
| <b>Acquisition Time (sec)</b> | 0.7340   | <b>Date</b>                   | Jun 2 2017 | <b>File Name</b>            | D:\BN\output\F19\F_2017\2017.06.02\BM-1094_20170602_01\FLUORINE_01 |                              |       |
| <b>Frequency (MHz)</b>        | 376.31   | <b>Nucleus</b>                | 19F        | <b>Number of Transients</b> | 16                                                                 | <b>Original Points Count</b> | 65536 |
| <b>Points Count</b>           | 65536    | <b>Pulse Sequence</b>         | s2pul      | <b>Solvent</b>              | CHLOROFORM-D                                                       |                              |       |
| <b>Sweep Width (Hz)</b>       | 89285.71 | <b>Temperature (degree C)</b> | 25.000     |                             |                                                                    |                              |       |

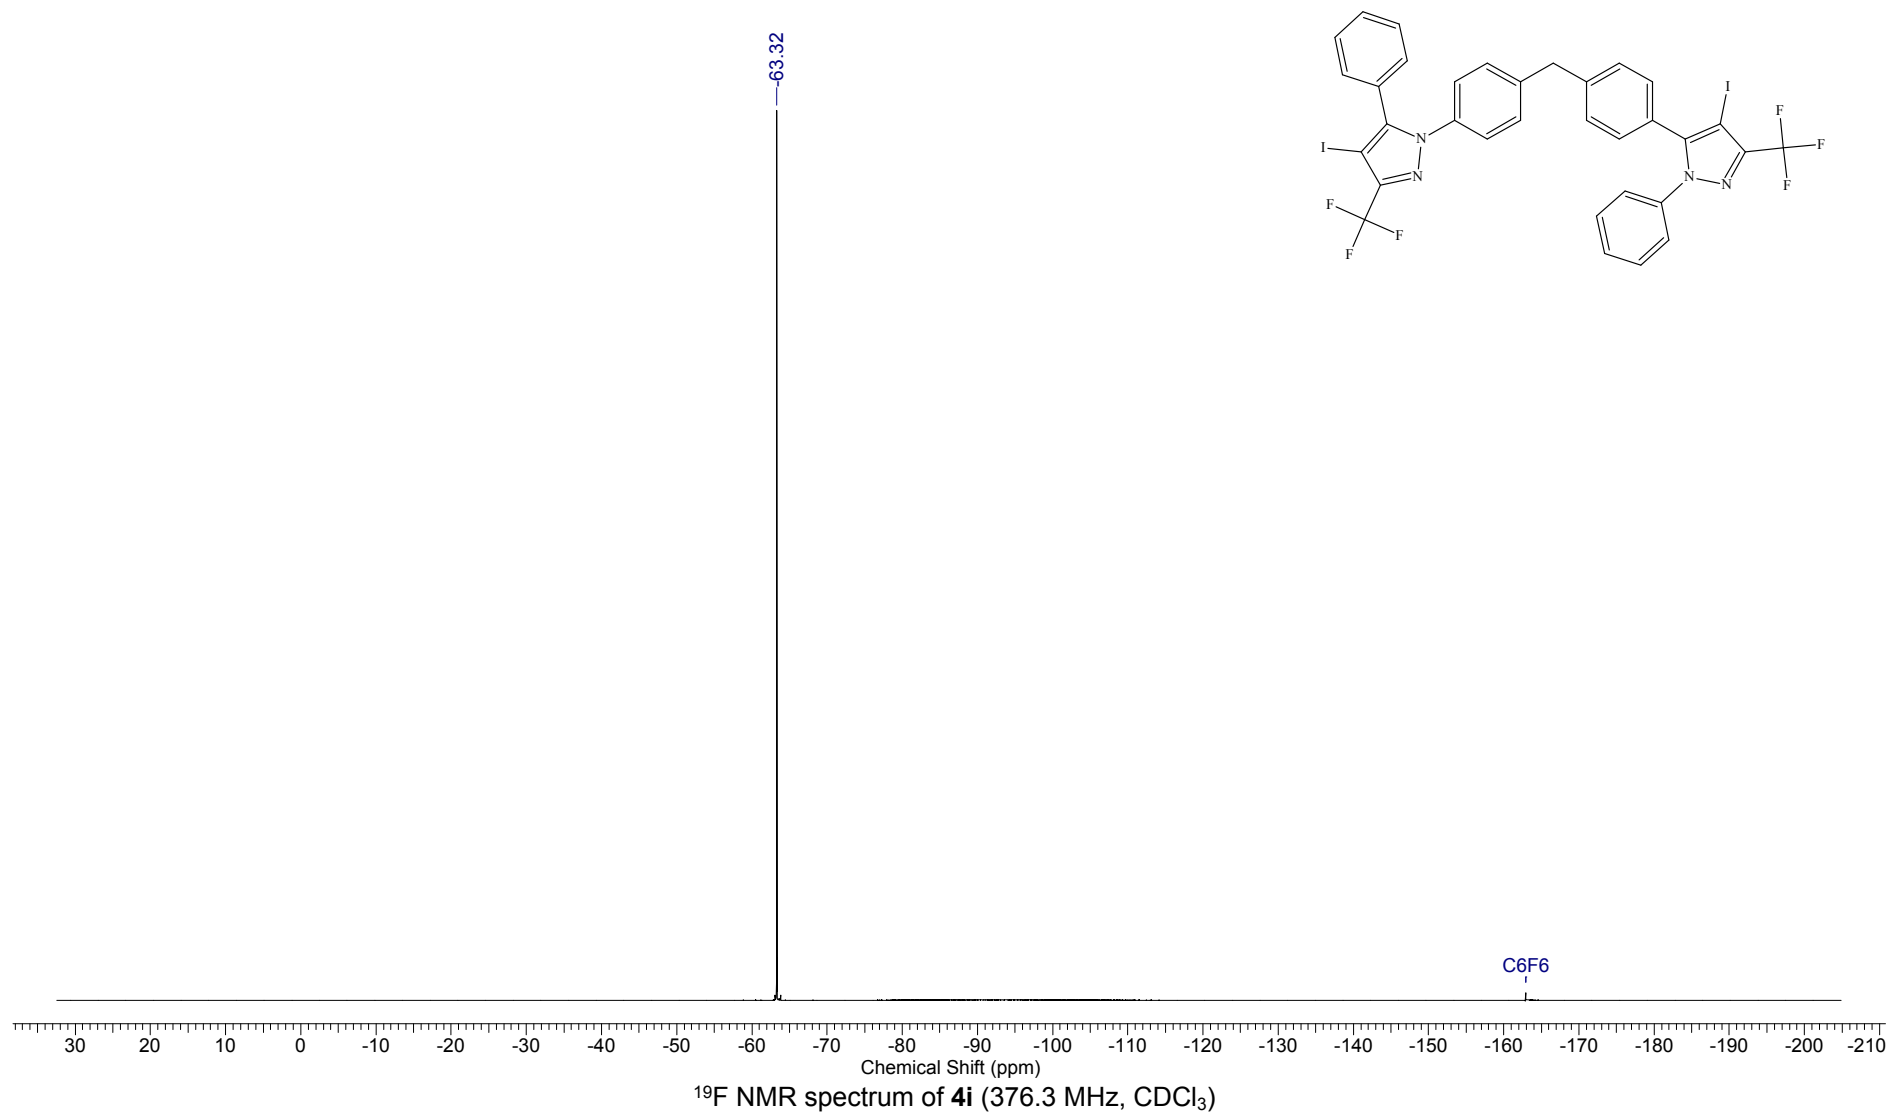

|           |          |                |                                                                                 |
|-----------|----------|----------------|---------------------------------------------------------------------------------|
| <b>FW</b> | 492.2551 | <b>Formula</b> | C <sub>17</sub> H <sub>12</sub> F <sub>3</sub> IN <sub>2</sub> O <sub>2</sub> S |
|-----------|----------|----------------|---------------------------------------------------------------------------------|

|                               |                                              |                               |                      |                       |             |                             |              |
|-------------------------------|----------------------------------------------|-------------------------------|----------------------|-----------------------|-------------|-----------------------------|--------------|
| <b>Acquisition Time (sec)</b> | 2.5559                                       | <b>Comment</b>                | Imported from UXMNR. |                       | <b>Date</b> | 01 Jun 2017 11:20:26        |              |
| <b>File Name</b>              | D:\BN\output\2017\06.epi\BM-1093-1.H_001001r | <b>Frequency (MHz)</b>        | 400.13               | <b>Nucleus</b>        | 1H          | <b>Number of Transients</b> | 4            |
| <b>Original Points Count</b>  | 16384                                        | <b>Points Count</b>           | 65536                | <b>Pulse Sequence</b> | zg30        | <b>Solvent</b>              | CHLOROFORM-D |
| <b>Sweep Width (Hz)</b>       | 6410.26                                      | <b>Temperature (degree C)</b> | 27.000               |                       |             |                             |              |

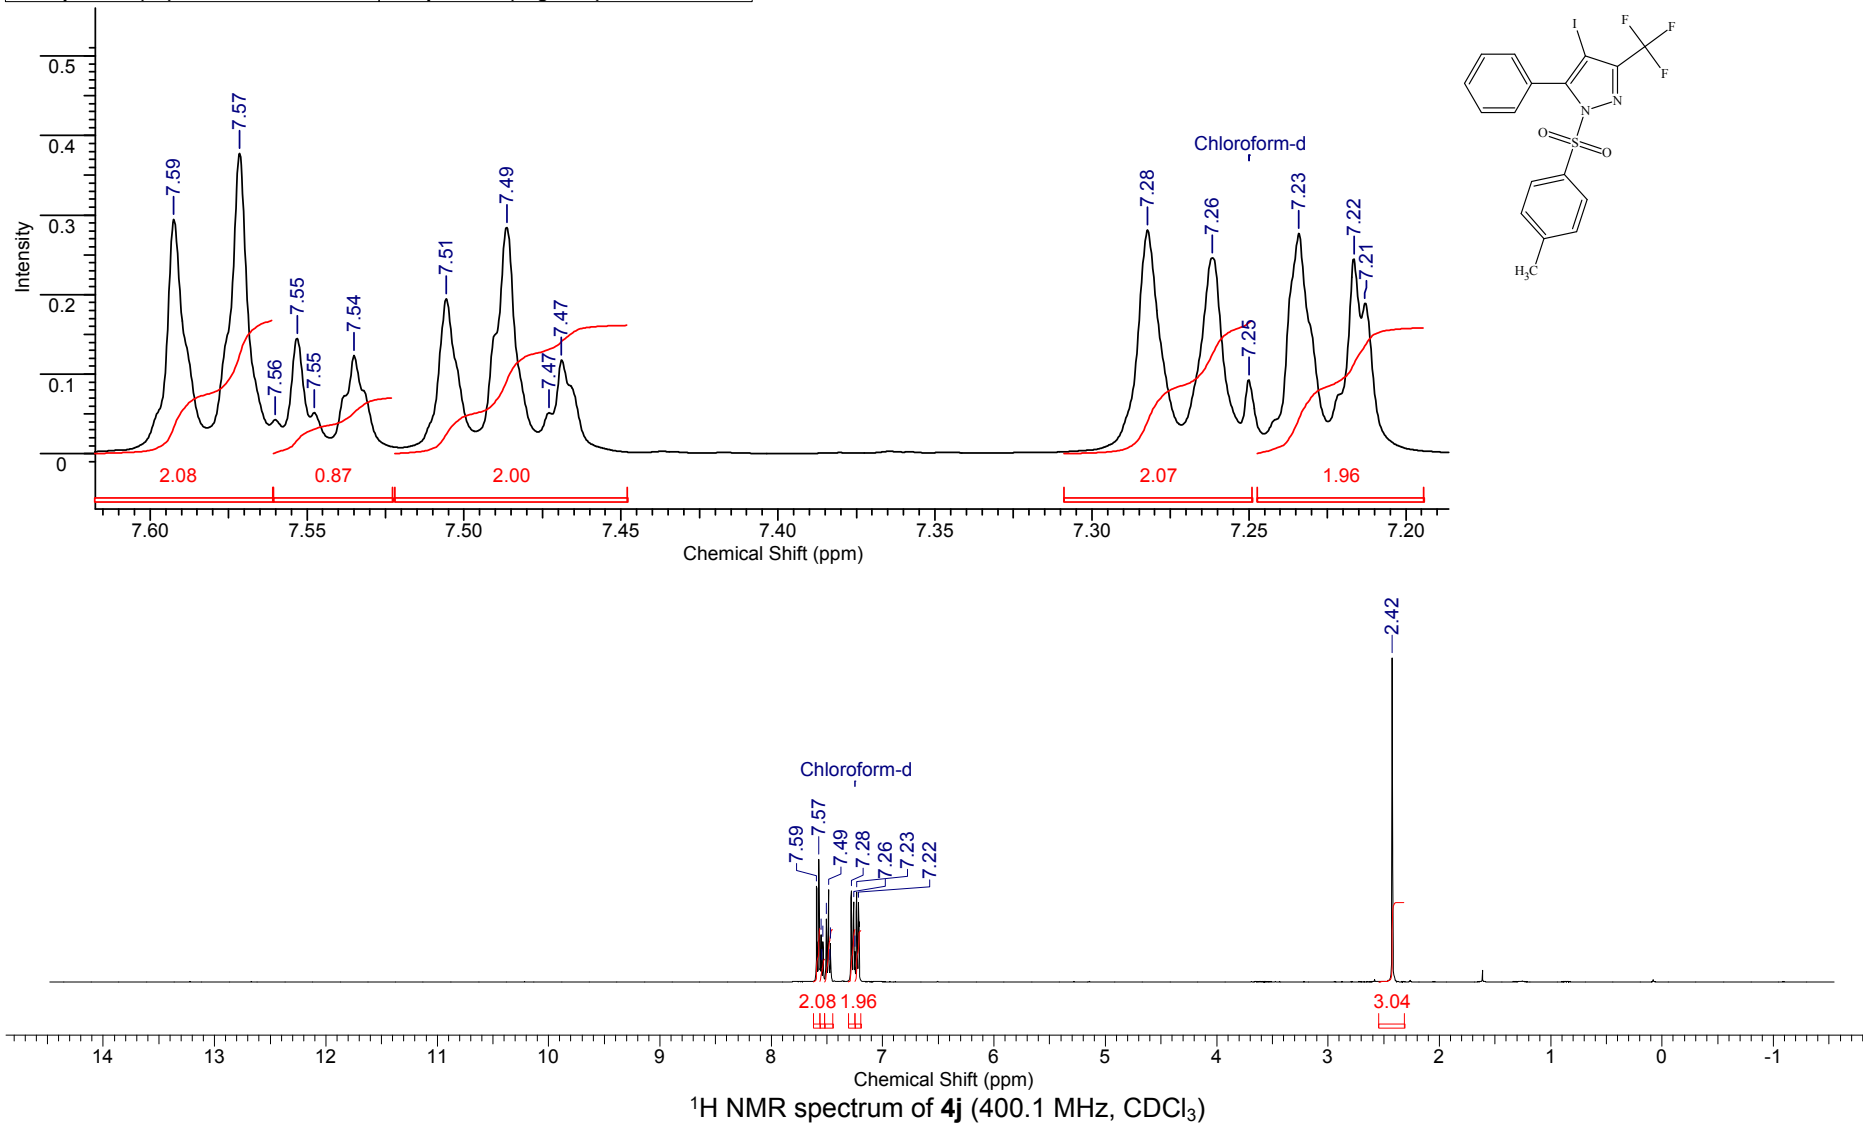

|           |          |                |                                                                                 |
|-----------|----------|----------------|---------------------------------------------------------------------------------|
| <b>FW</b> | 492.2551 | <b>Formula</b> | C <sub>17</sub> H <sub>12</sub> F <sub>3</sub> IN <sub>2</sub> O <sub>2</sub> S |
|-----------|----------|----------------|---------------------------------------------------------------------------------|

|                               |                                                |                              |                      |                               |                      |
|-------------------------------|------------------------------------------------|------------------------------|----------------------|-------------------------------|----------------------|
| <b>Acquisition Time (sec)</b> | 0.4999                                         | <b>Comment</b>               | Imported from UXNMR. | <b>Date</b>                   | 01 Jun 2017 11:28:44 |
| <b>File Name</b>              | D:\BN\output\2017\06.ep f \BM-1093-1.C_002001r | <b>Frequency (MHz)</b>       | 100.61               | <b>Nucleus</b>                | <sup>13</sup> C      |
| <b>Number of Transients</b>   | 256                                            | <b>Original Points Count</b> | 12076                | <b>Points Count</b>           | 65536                |
| <b>Solvent</b>                | CHLOROFORM-D                                   | <b>Sweep Width (Hz)</b>      | 24154.59             | <b>Pulse Sequence</b>         | zpgg30               |
|                               |                                                |                              |                      | <b>Temperature (degree C)</b> | 27.000               |

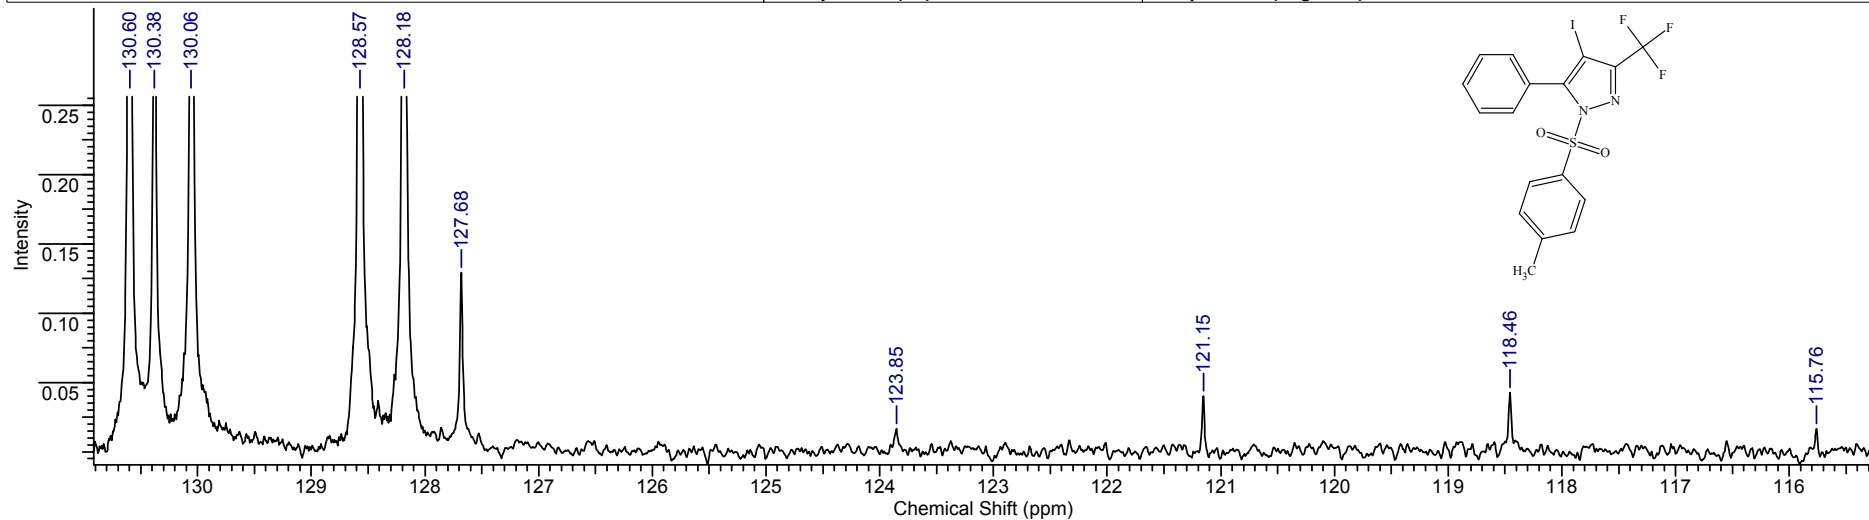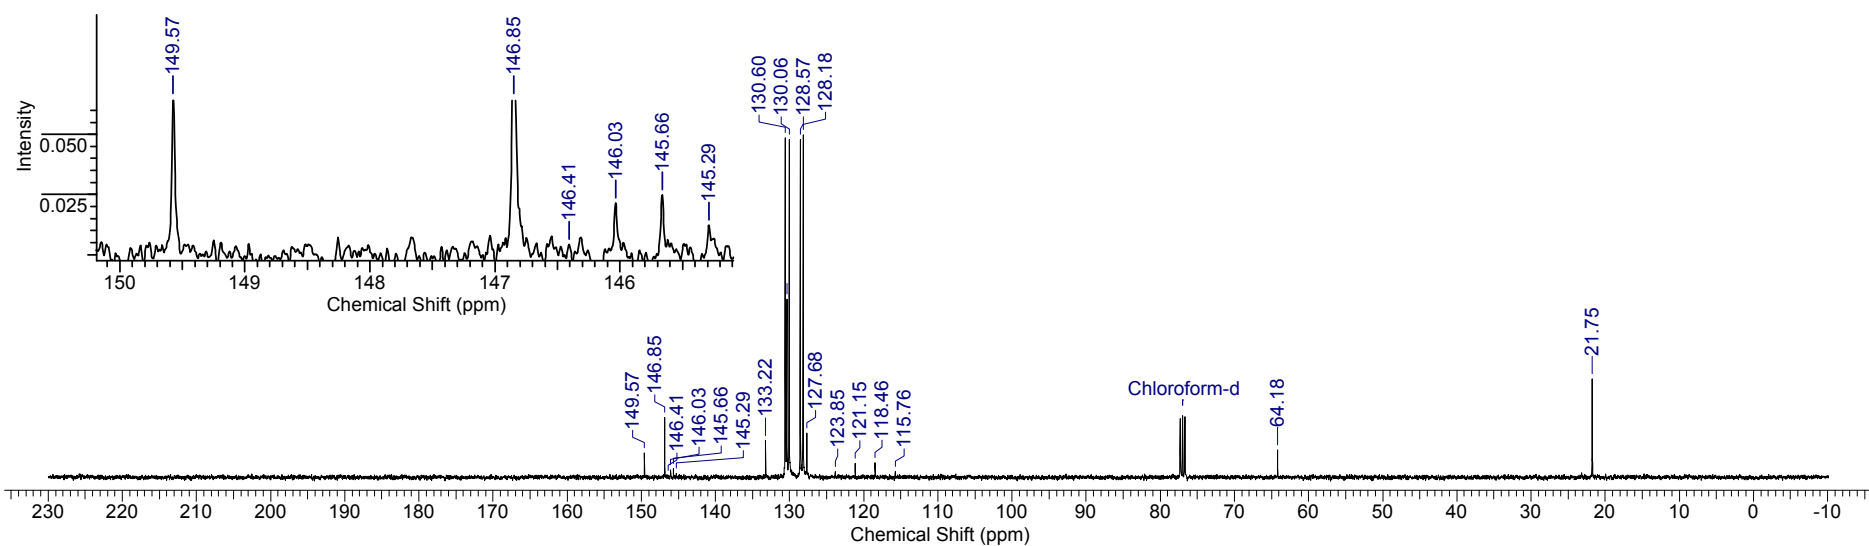

<sup>13</sup>C NMR spectrum of **4j** (100.6 MHz, CDCl<sub>3</sub>)

|           |          |                |                                                                                 |
|-----------|----------|----------------|---------------------------------------------------------------------------------|
| <b>FW</b> | 492.2551 | <b>Formula</b> | C <sub>17</sub> H <sub>12</sub> F <sub>3</sub> IN <sub>2</sub> O <sub>2</sub> S |
|-----------|----------|----------------|---------------------------------------------------------------------------------|

|                               |          |                               |                 |                             |                                                                      |                              |       |
|-------------------------------|----------|-------------------------------|-----------------|-----------------------------|----------------------------------------------------------------------|------------------------------|-------|
| <b>Acquisition Time (sec)</b> | 0.7340   | <b>Date</b>                   | Jun 2 2017      | <b>File Name</b>            | D:\BN\output\F19\F_2017\2017.06.02\BM-1093-1_20170602_01\FLUORINE_01 |                              |       |
| <b>Frequency (MHz)</b>        | 376.31   | <b>Nucleus</b>                | <sup>19</sup> F | <b>Number of Transients</b> | 16                                                                   | <b>Original Points Count</b> | 65536 |
| <b>Points Count</b>           | 65536    | <b>Pulse Sequence</b>         | s2pul           | <b>Solvent</b>              | CHLOROFORM-D                                                         |                              |       |
| <b>Sweep Width (Hz)</b>       | 89285.71 | <b>Temperature (degree C)</b> | 25.000          |                             |                                                                      |                              |       |

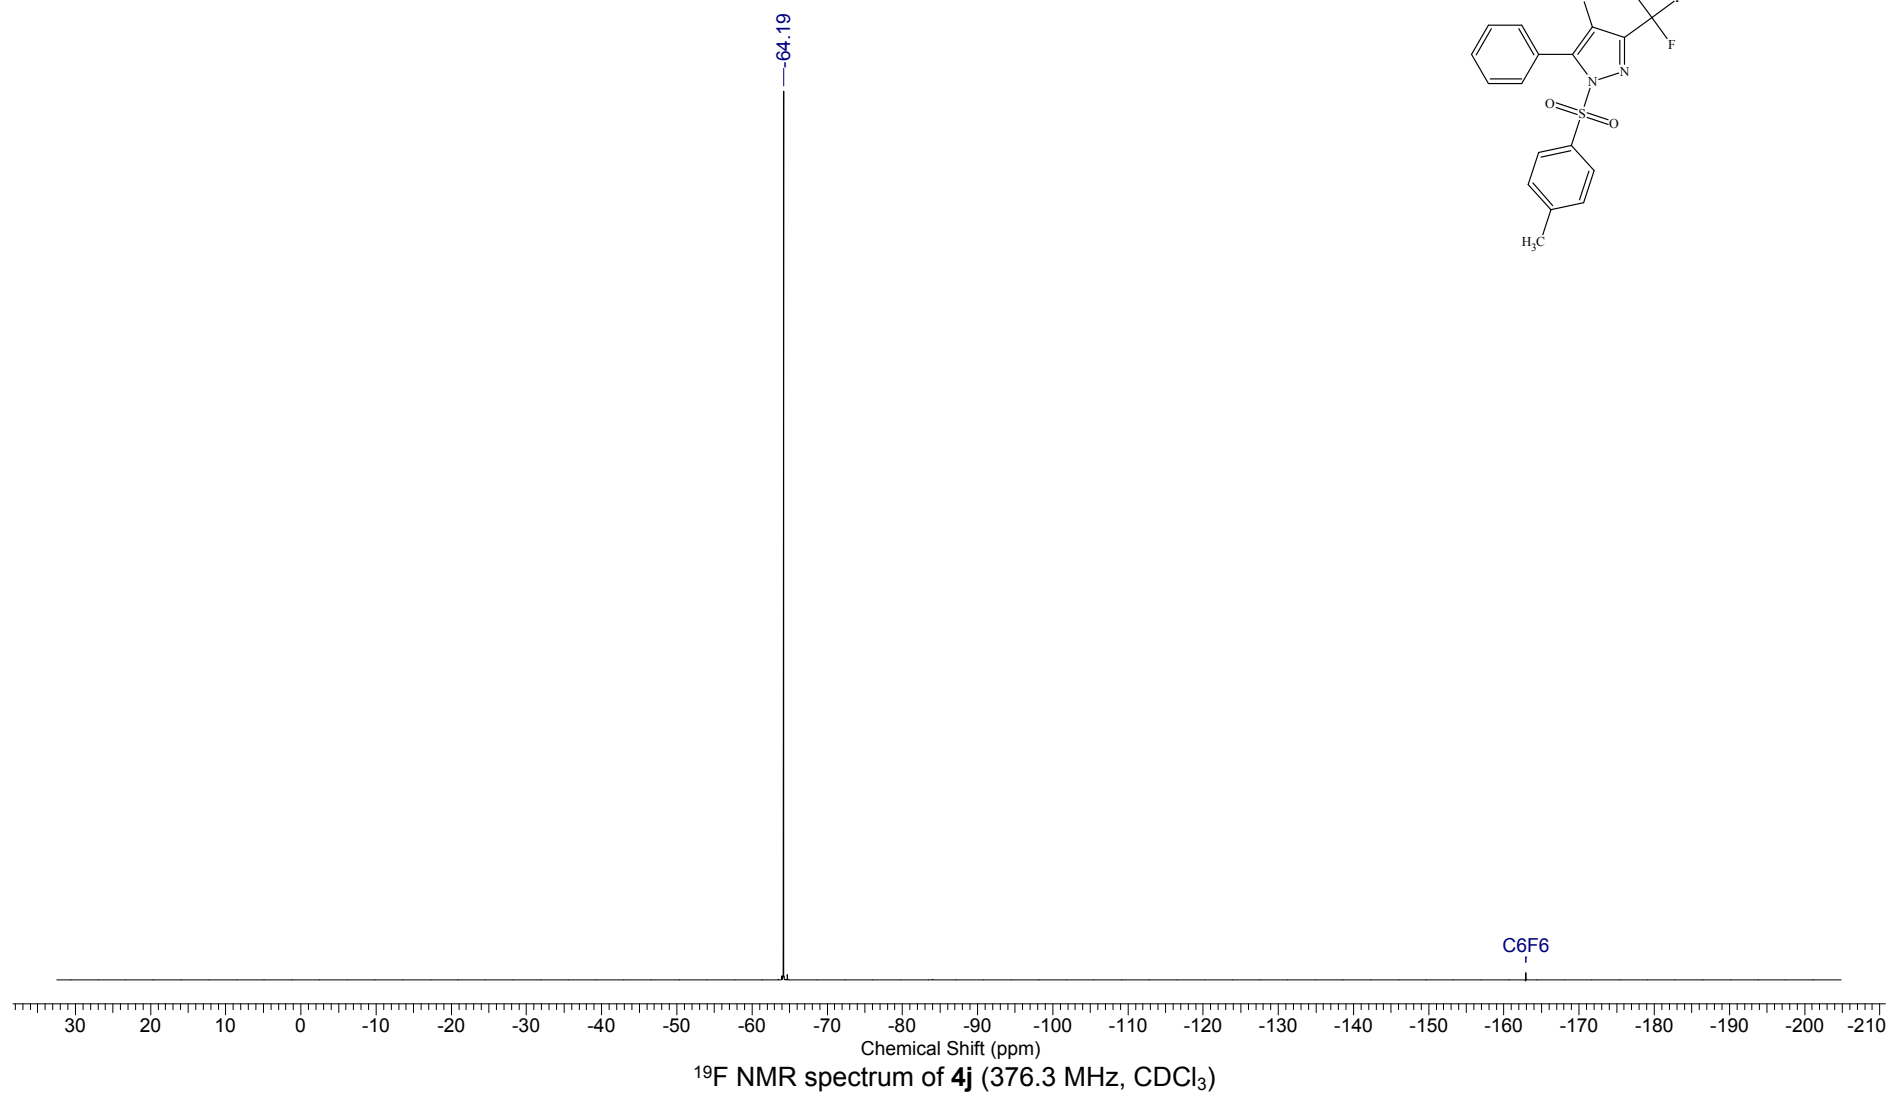

|           |          |                |                                                                |
|-----------|----------|----------------|----------------------------------------------------------------|
| <b>FW</b> | 394.1741 | <b>Formula</b> | C <sub>14</sub> H <sub>14</sub> F <sub>3</sub> IN <sub>2</sub> |
|-----------|----------|----------------|----------------------------------------------------------------|

|                               |                                            |                               |                      |                       |             |                             |              |
|-------------------------------|--------------------------------------------|-------------------------------|----------------------|-----------------------|-------------|-----------------------------|--------------|
| <b>Acquisition Time (sec)</b> | 2.5559                                     | <b>Comment</b>                | Imported from UXMNR. |                       | <b>Date</b> | 06 Jun 2017 15:09:52        |              |
| <b>File Name</b>              | D:\BN\output\2017\06.epi\BM-1106.H_001001r | <b>Frequency (MHz)</b>        | 400.13               | <b>Nucleus</b>        | 1H          | <b>Number of Transients</b> | 4            |
| <b>Original Points Count</b>  | 16384                                      | <b>Points Count</b>           | 65536                | <b>Pulse Sequence</b> | zg30        | <b>Solvent</b>              | CHLOROFORM-D |
| <b>Sweep Width (Hz)</b>       | 6410.26                                    | <b>Temperature (degree C)</b> | 27.000               |                       |             |                             |              |

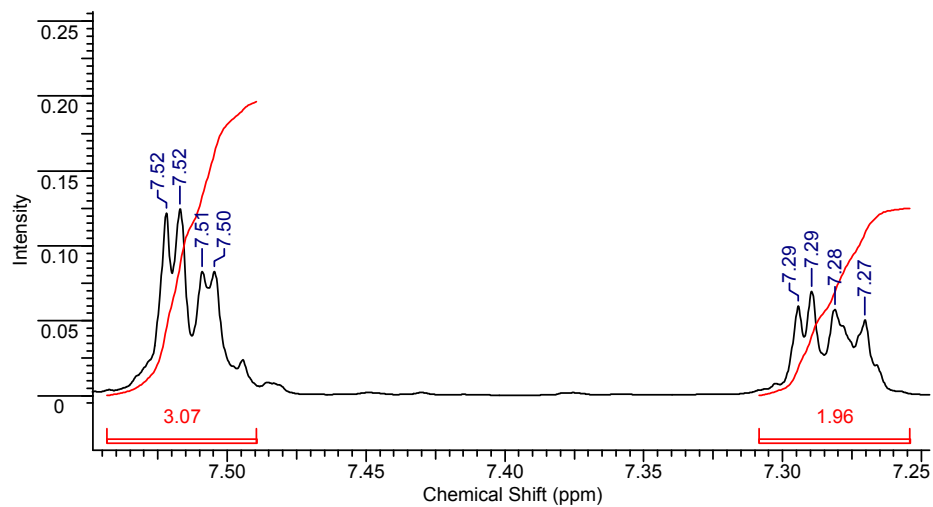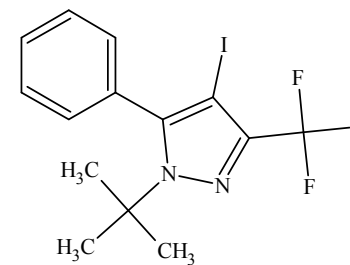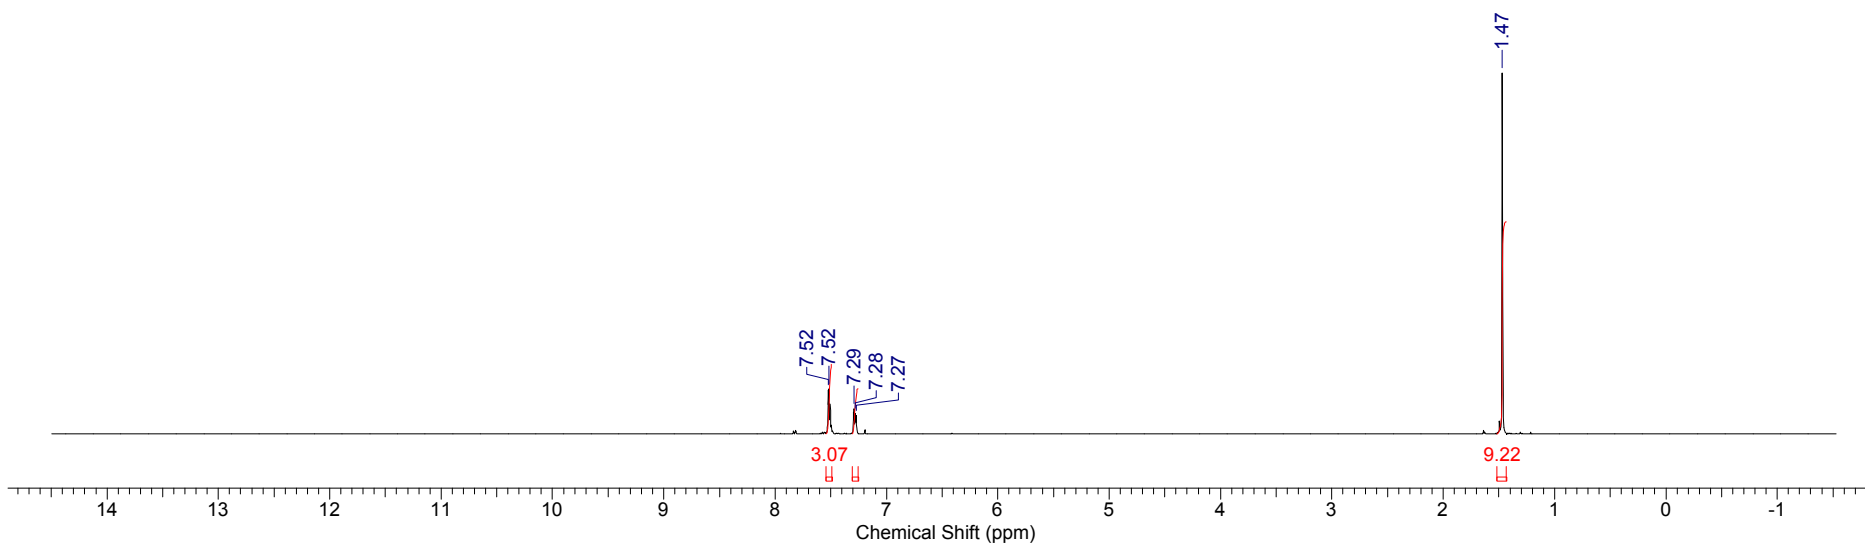

<sup>1</sup>H NMR spectrum of **4k** (400.1 MHz, CDCl<sub>3</sub>)



**FW** 394.1741 **Formula** C<sub>14</sub>H<sub>14</sub>F<sub>3</sub>IN<sub>2</sub>

| Acquisition Time (sec) | 0.4999                                        | Comment                | Imported from UXMNR. | Date           | 06 Jun 2017 15:13:34 |
|------------------------|-----------------------------------------------|------------------------|----------------------|----------------|----------------------|
| File Name              | D:\BN\output\2017\06.ép í ú\BM-1106.C_002001r | Frequency (MHz)        | 100.61               | Nucleus        | 13C                  |
| Number of Transients   | 74                                            | Original Points Count  | 12076                | Points Count   | 65536                |
| Solvent                | CHLOROFORM-D                                  | Sweep Width (Hz)       | 24154.59             | Pulse Sequence | zgpg30               |
|                        |                                               | Temperature (degree C) | 27.000               |                |                      |

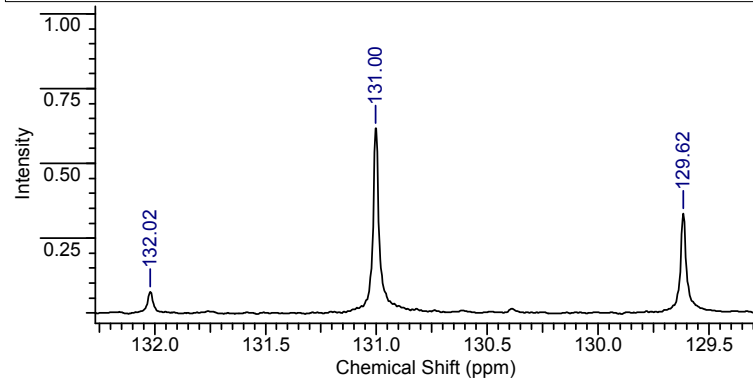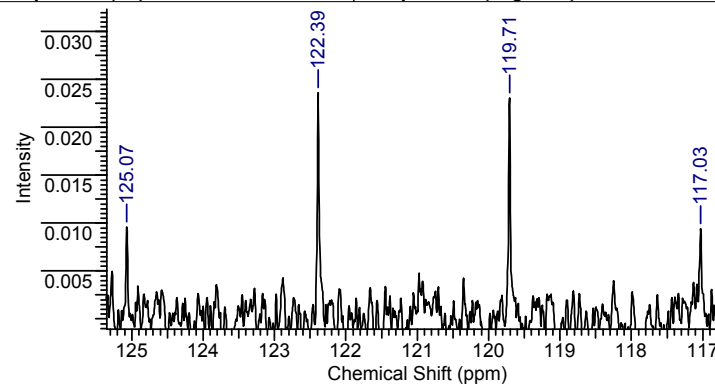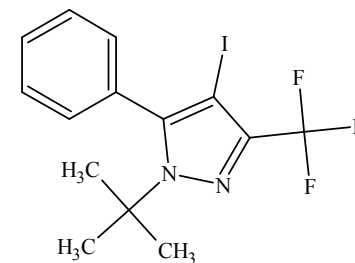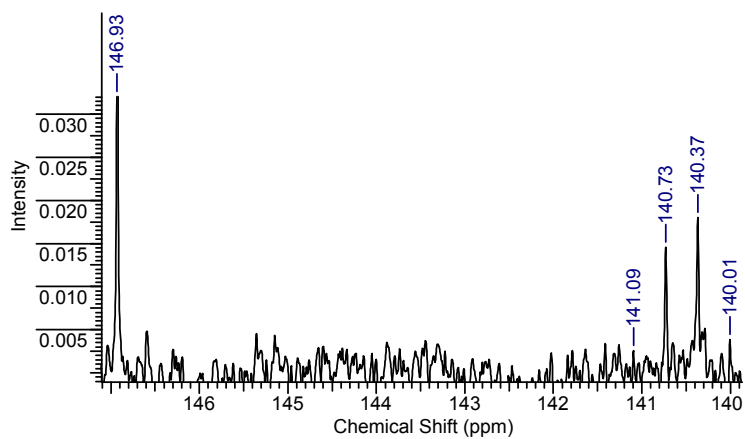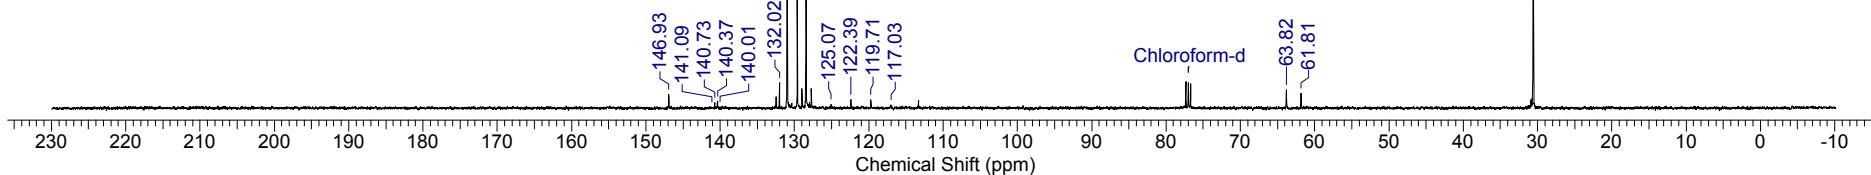

<sup>13</sup>C NMR spectrum of **4k** (100.6 MHz, CDCl<sub>3</sub>)

|           |          |                |                                                                |
|-----------|----------|----------------|----------------------------------------------------------------|
| <b>FW</b> | 394.1741 | <b>Formula</b> | C <sub>14</sub> H <sub>14</sub> F <sub>3</sub> IN <sub>2</sub> |
|-----------|----------|----------------|----------------------------------------------------------------|

|                               |          |                               |                 |                             |                                                                    |                              |       |
|-------------------------------|----------|-------------------------------|-----------------|-----------------------------|--------------------------------------------------------------------|------------------------------|-------|
| <b>Acquisition Time (sec)</b> | 0.7340   | <b>Date</b>                   | Jun 7 2017      | <b>File Name</b>            | D:\BN\output\F19\F_2017\2017.06.07\BM-1106_20170607_01\FLUORINE_01 |                              |       |
| <b>Frequency (MHz)</b>        | 376.31   | <b>Nucleus</b>                | <sup>19</sup> F | <b>Number of Transients</b> | 16                                                                 | <b>Original Points Count</b> | 65536 |
| <b>Points Count</b>           | 65536    | <b>Pulse Sequence</b>         | s2pul           | <b>Solvent</b>              | CHLOROFORM-D                                                       |                              |       |
| <b>Sweep Width (Hz)</b>       | 89285.71 | <b>Temperature (degree C)</b> | 25.000          |                             |                                                                    |                              |       |

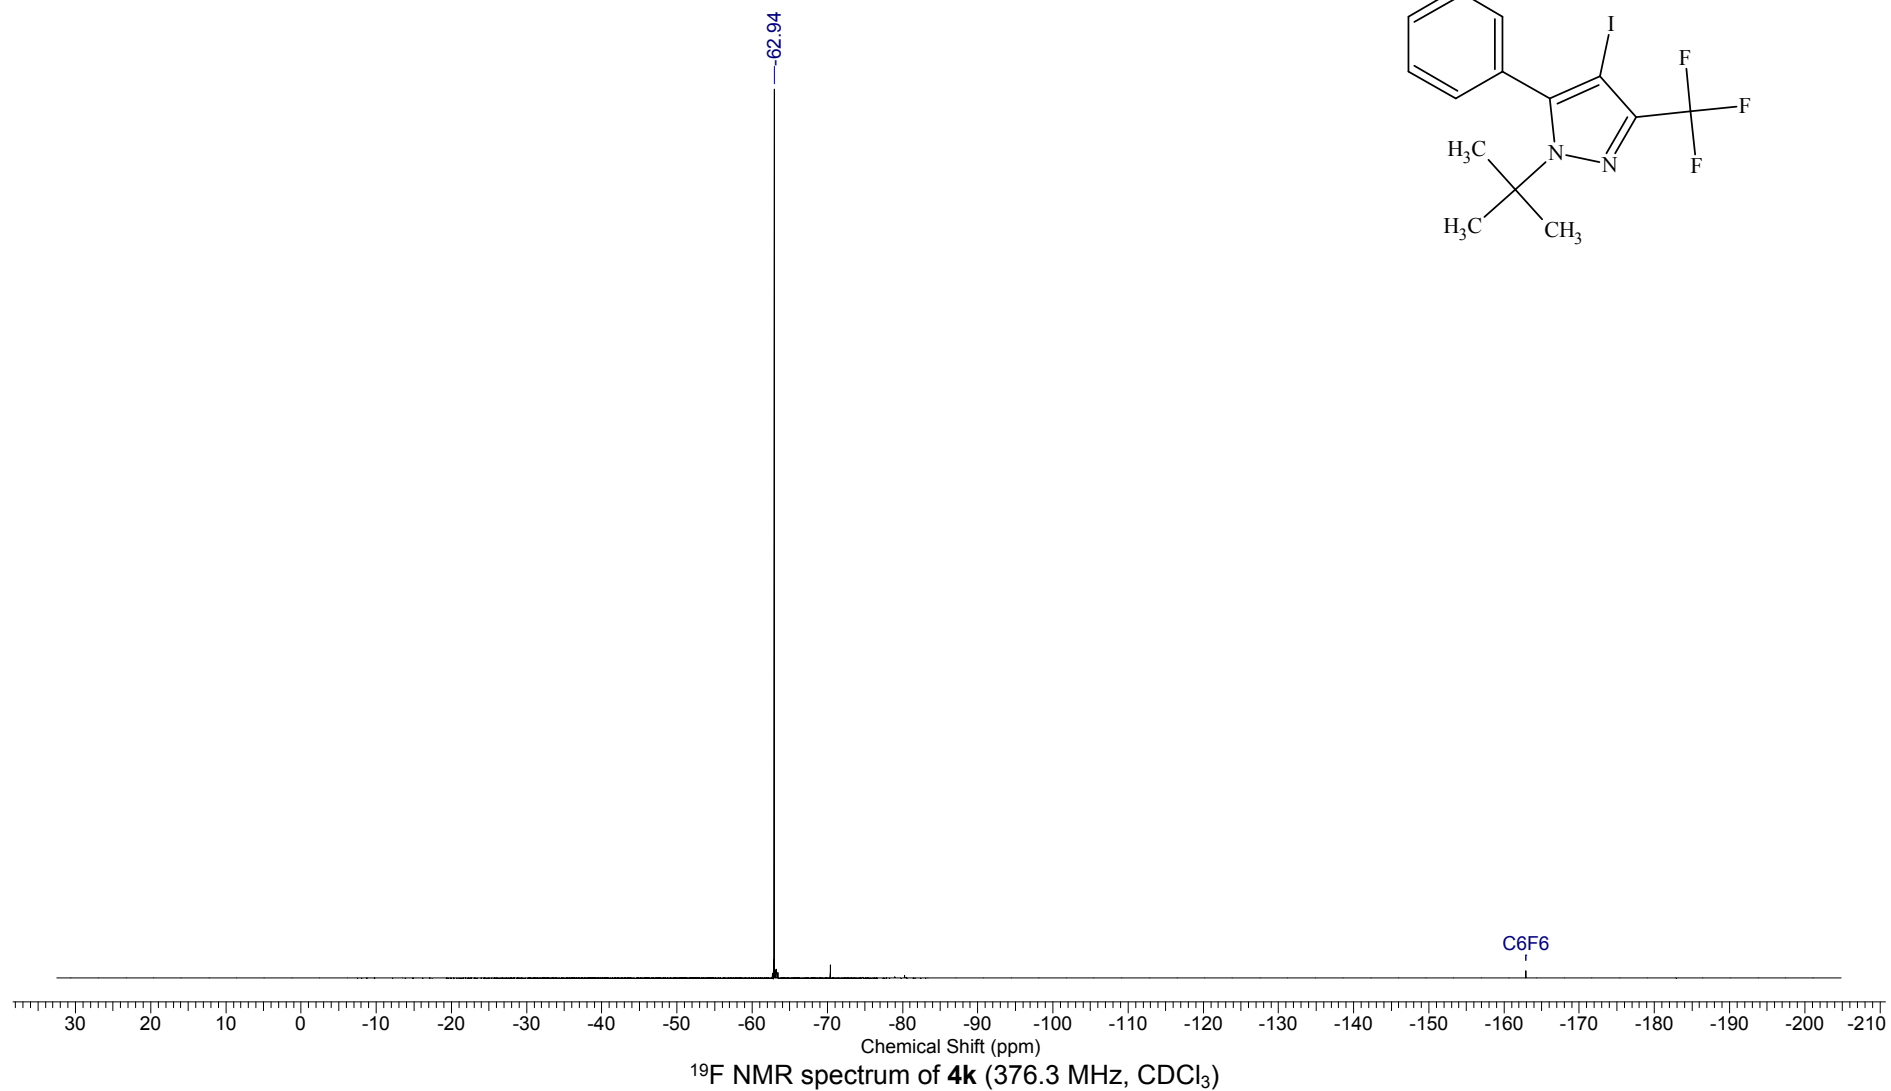

FW 428.1903 Formula C<sub>17</sub>H<sub>12</sub>F<sub>3</sub>IN<sub>2</sub>

| Acquisition Time (sec) | 2.5559                                     | Comment                | Imported from UXNMR. |                | Date | 02 Jun 2017 15:27:22 |              |
|------------------------|--------------------------------------------|------------------------|----------------------|----------------|------|----------------------|--------------|
| File Name              | D:\BN\output\2017\06.epi\BM-1099.H_001001r | Frequency (MHz)        | 400.13               | Nucleus        | 1H   | Number of Transients | 4            |
| Original Points Count  | 16384                                      | Points Count           | 65536                | Pulse Sequence | zg30 | Solvent              | CHLOROFORM-D |
| Sweep Width (Hz)       | 6410.26                                    | Temperature (degree C) | 27.000               |                |      |                      |              |

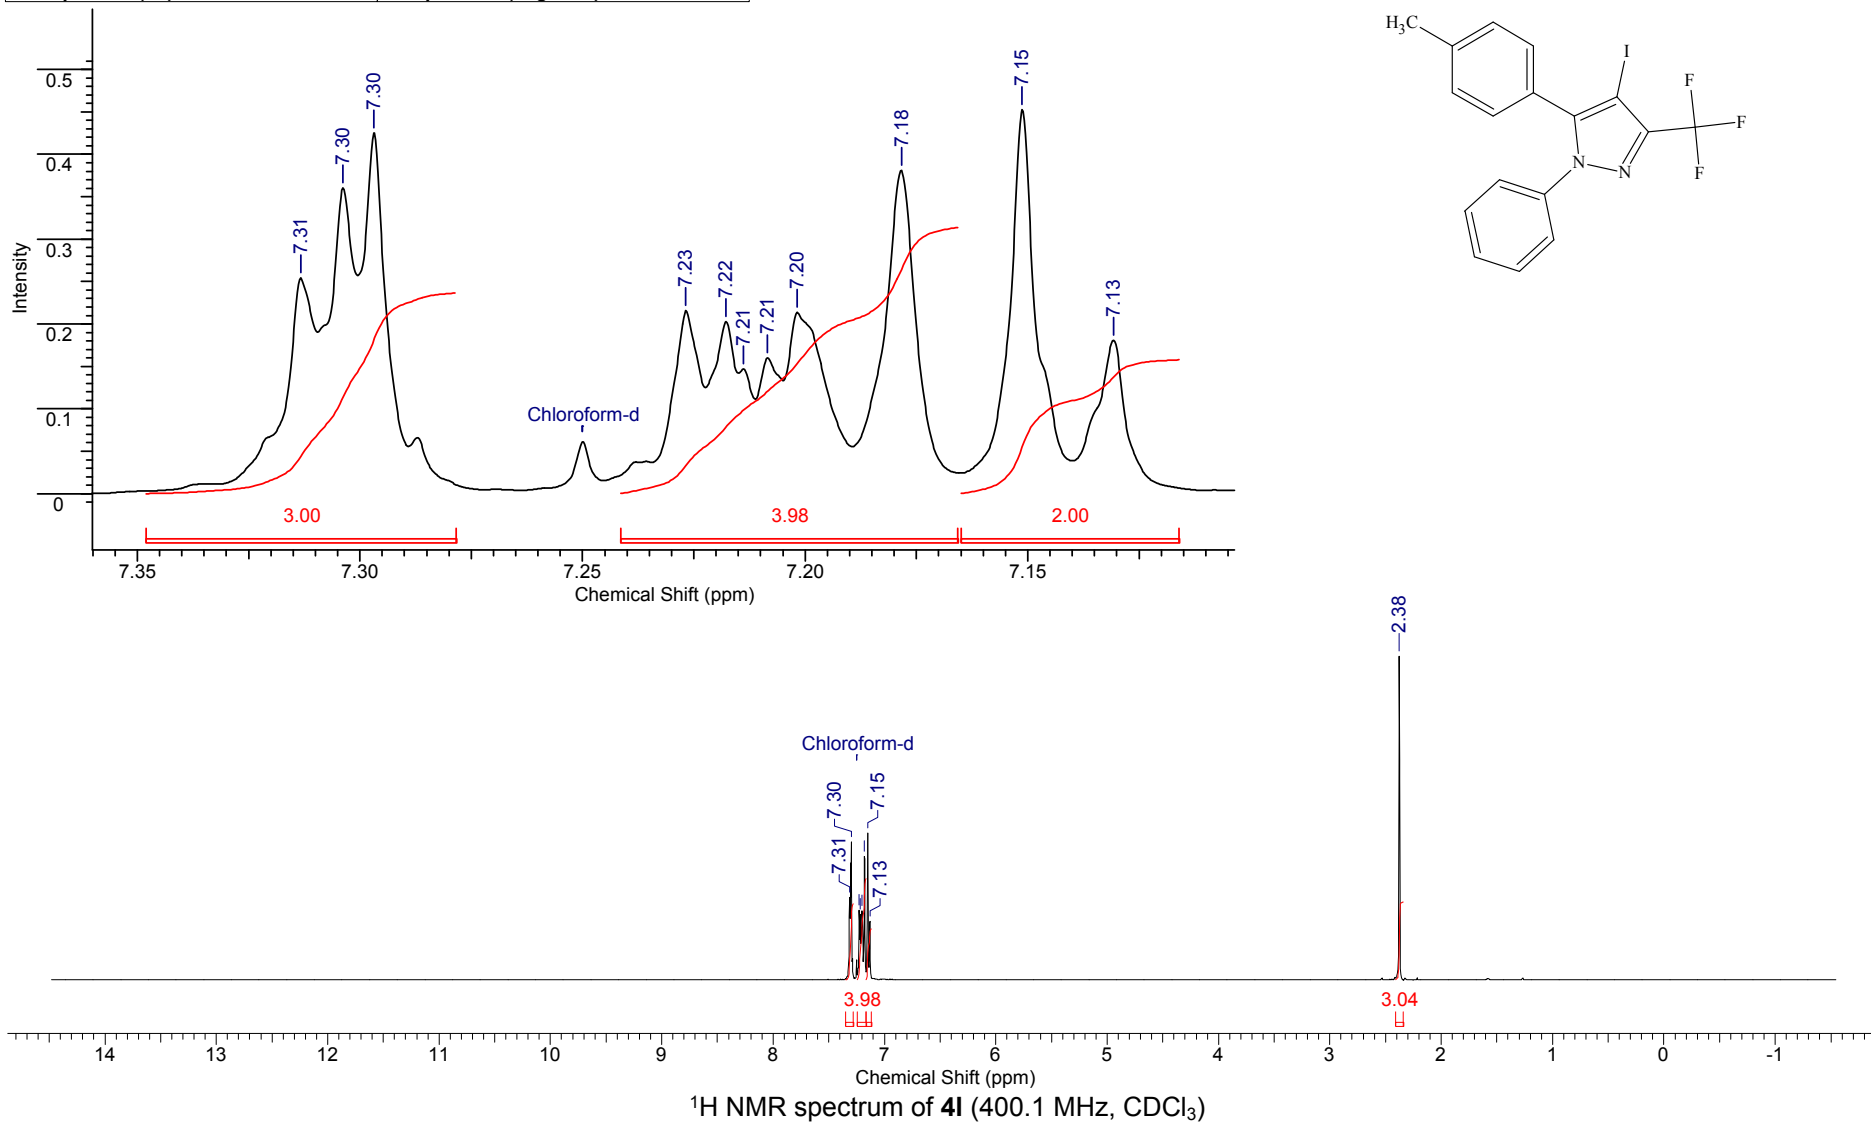

**FW** 428.1903 **Formula** C<sub>17</sub>H<sub>12</sub>F<sub>3</sub>IN<sub>2</sub>

| Acquisition Time (sec) | 0.4999                                     | Comment                | Imported from UXMNR. | Date           | 02 Jun 2017 15:31:02 |
|------------------------|--------------------------------------------|------------------------|----------------------|----------------|----------------------|
| File Name              | D:\BN\output\2017\06.epi\BM-1099.C_002001r | Frequency (MHz)        | 100.61               | Nucleus        | <sup>13</sup> C      |
| Number of Transients   | 116                                        | Original Points Count  | 12076                | Points Count   | 65536                |
| Solvent                | CHLOROFORM-D                               | Sweep Width (Hz)       | 24154.59             | Pulse Sequence | zgpg30               |
|                        |                                            | Temperature (degree C) | 27.000               |                |                      |

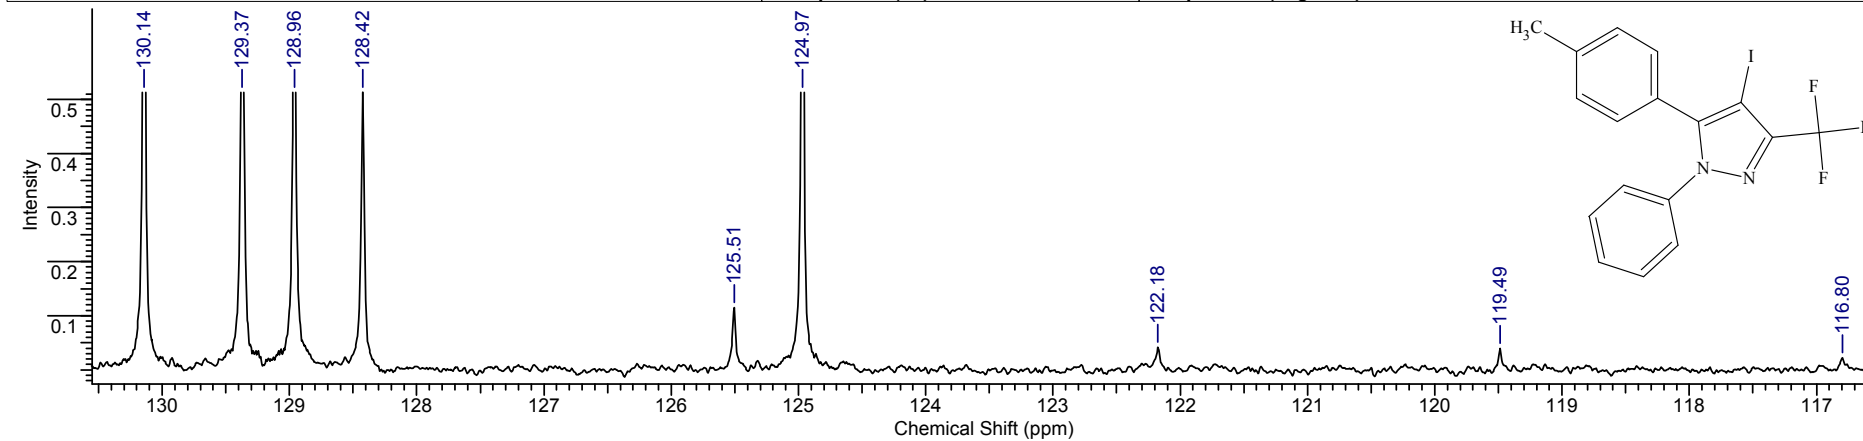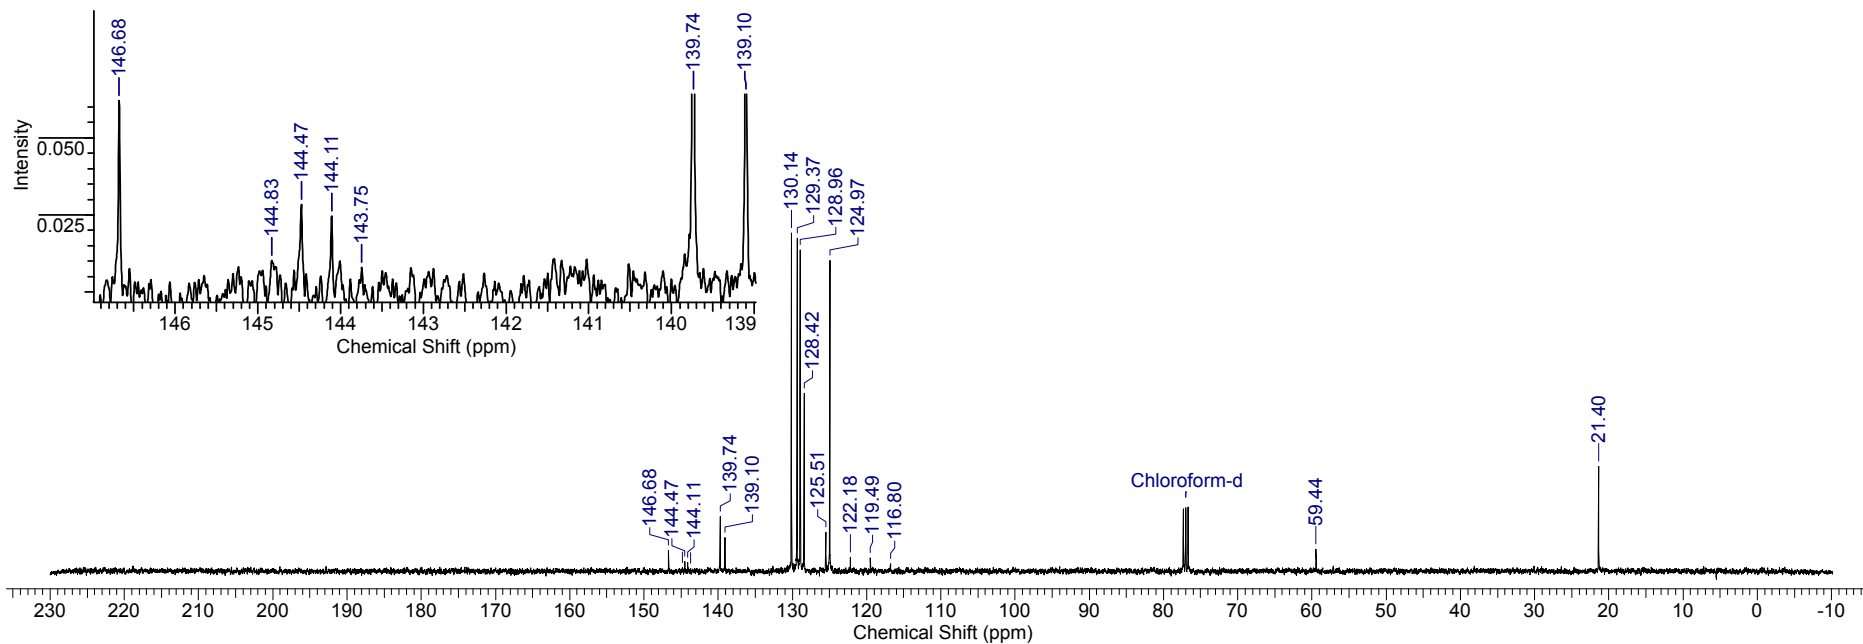

<sup>13</sup>C NMR spectrum of **4I** (100.6 MHz, CDCl<sub>3</sub>)

|           |          |                |                                                                |
|-----------|----------|----------------|----------------------------------------------------------------|
| <b>FW</b> | 428.1903 | <b>Formula</b> | C <sub>17</sub> H <sub>12</sub> F <sub>3</sub> IN <sub>2</sub> |
|-----------|----------|----------------|----------------------------------------------------------------|

|                               |          |                               |            |                             |                                                                      |                              |        |
|-------------------------------|----------|-------------------------------|------------|-----------------------------|----------------------------------------------------------------------|------------------------------|--------|
| <b>Acquisition Time (sec)</b> | 1.5729   | <b>Date</b>                   | Jun 8 2017 | <b>File Name</b>            | D:\BN\output\F19\F_2017\2017.06.08\BM-1099-F_20170608_01\FLUORINE_01 |                              |        |
| <b>Frequency (MHz)</b>        | 376.31   | <b>Nucleus</b>                | 19F        | <b>Number of Transients</b> | 8                                                                    | <b>Original Points Count</b> | 140434 |
| <b>Points Count</b>           | 262144   | <b>Pulse Sequence</b>         | s2pul      | <b>Solvent</b>              | CHLOROFORM-D                                                         |                              |        |
| <b>Sweep Width (Hz)</b>       | 89285.71 | <b>Temperature (degree C)</b> | 22.000     |                             |                                                                      |                              |        |

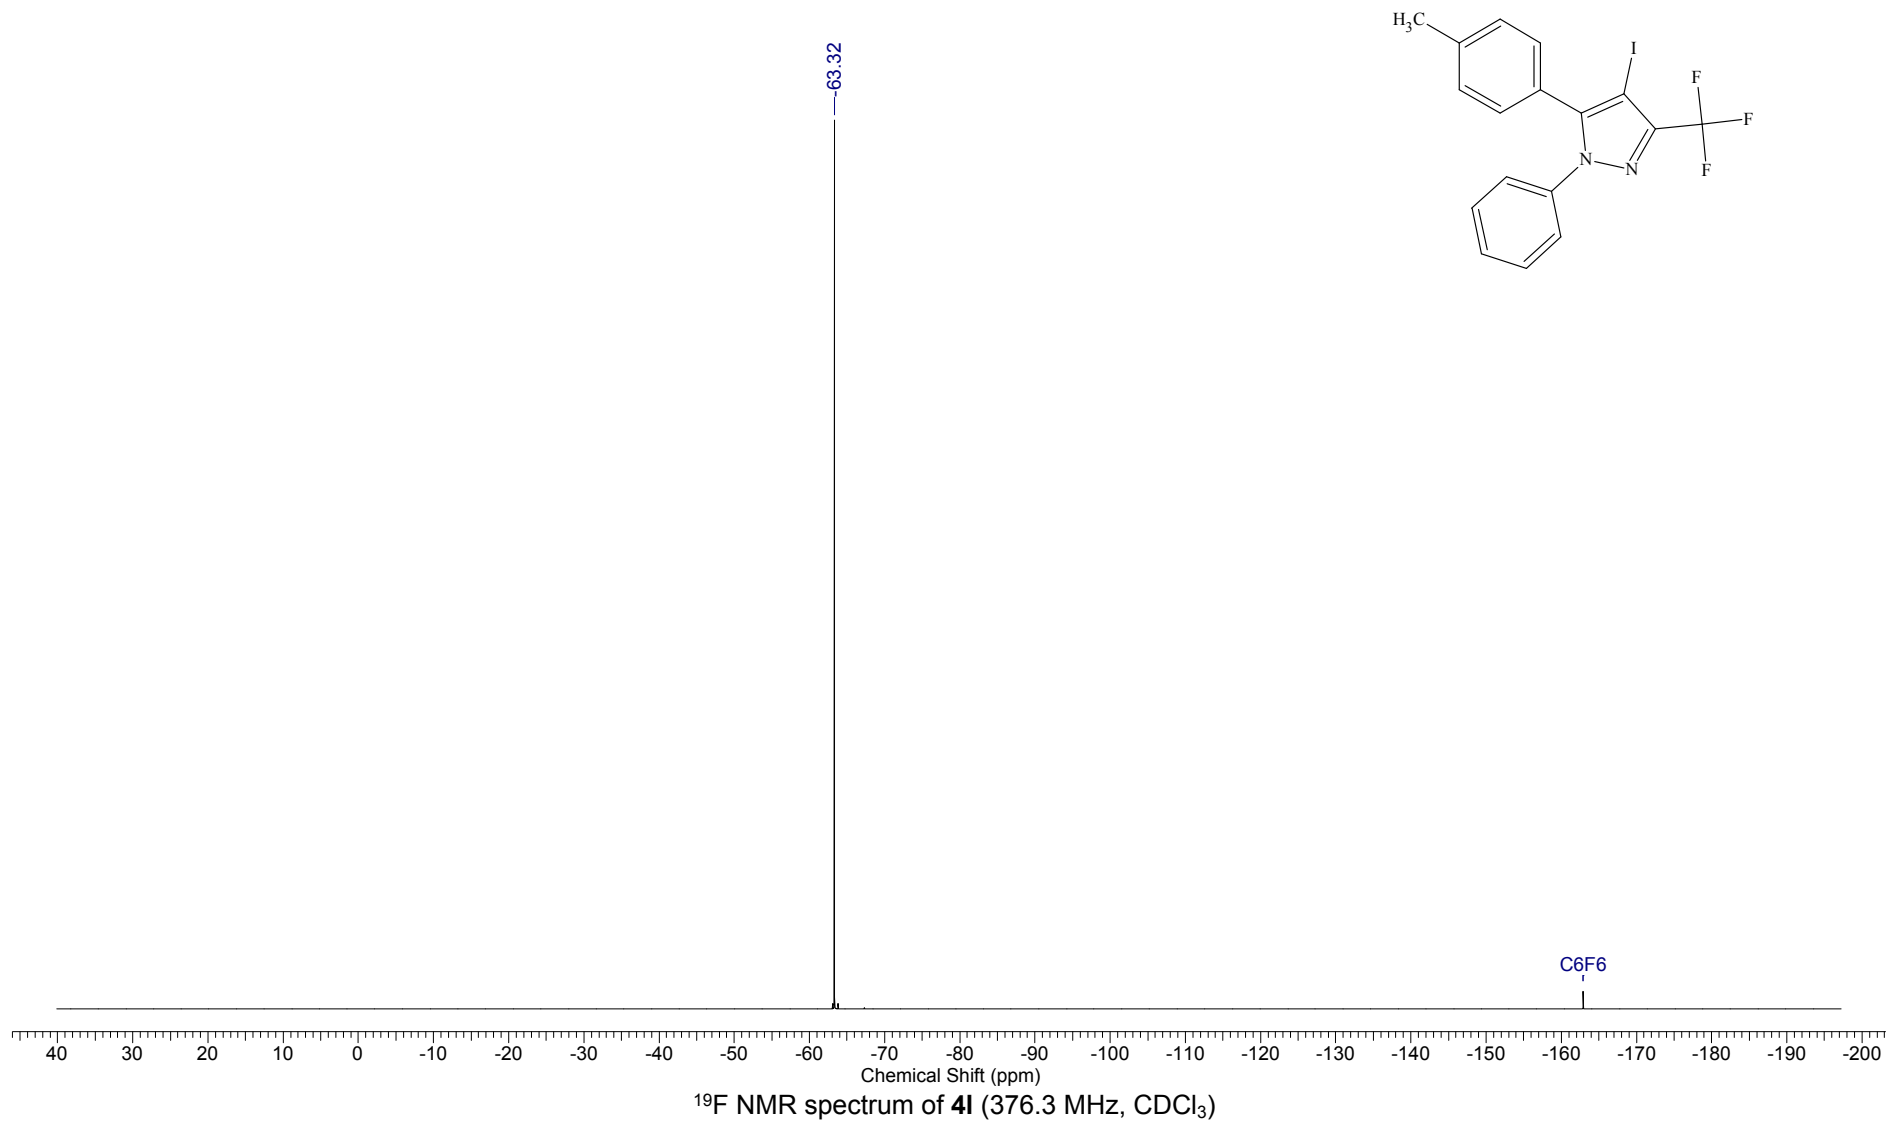

**FW** 444.1897 **Formula** C<sub>17</sub>H<sub>12</sub>F<sub>3</sub>IN<sub>2</sub>O

| Acquisition Time (sec) | 2.9295                                           | Comment               | Imported from UXNMR. | Date                   | 24 May 2017 23:15:02 |
|------------------------|--------------------------------------------------|-----------------------|----------------------|------------------------|----------------------|
| File Name              | D:\BN\output\2017\05.i à\BM-1076\BM-1076_001001r | Frequency (MHz)       | 400.13               | Nucleus                | <sup>1</sup> H       |
| Number of Transients   | 8                                                | Original Points Count | 16384                | Points Count           | 65536                |
| Solvent                | CHLOROFORM-D                                     | Sweep Width (Hz)      | 5592.84              | Pulse Sequence         | zg30                 |
|                        |                                                  |                       |                      | Temperature (degree C) | 27.000               |

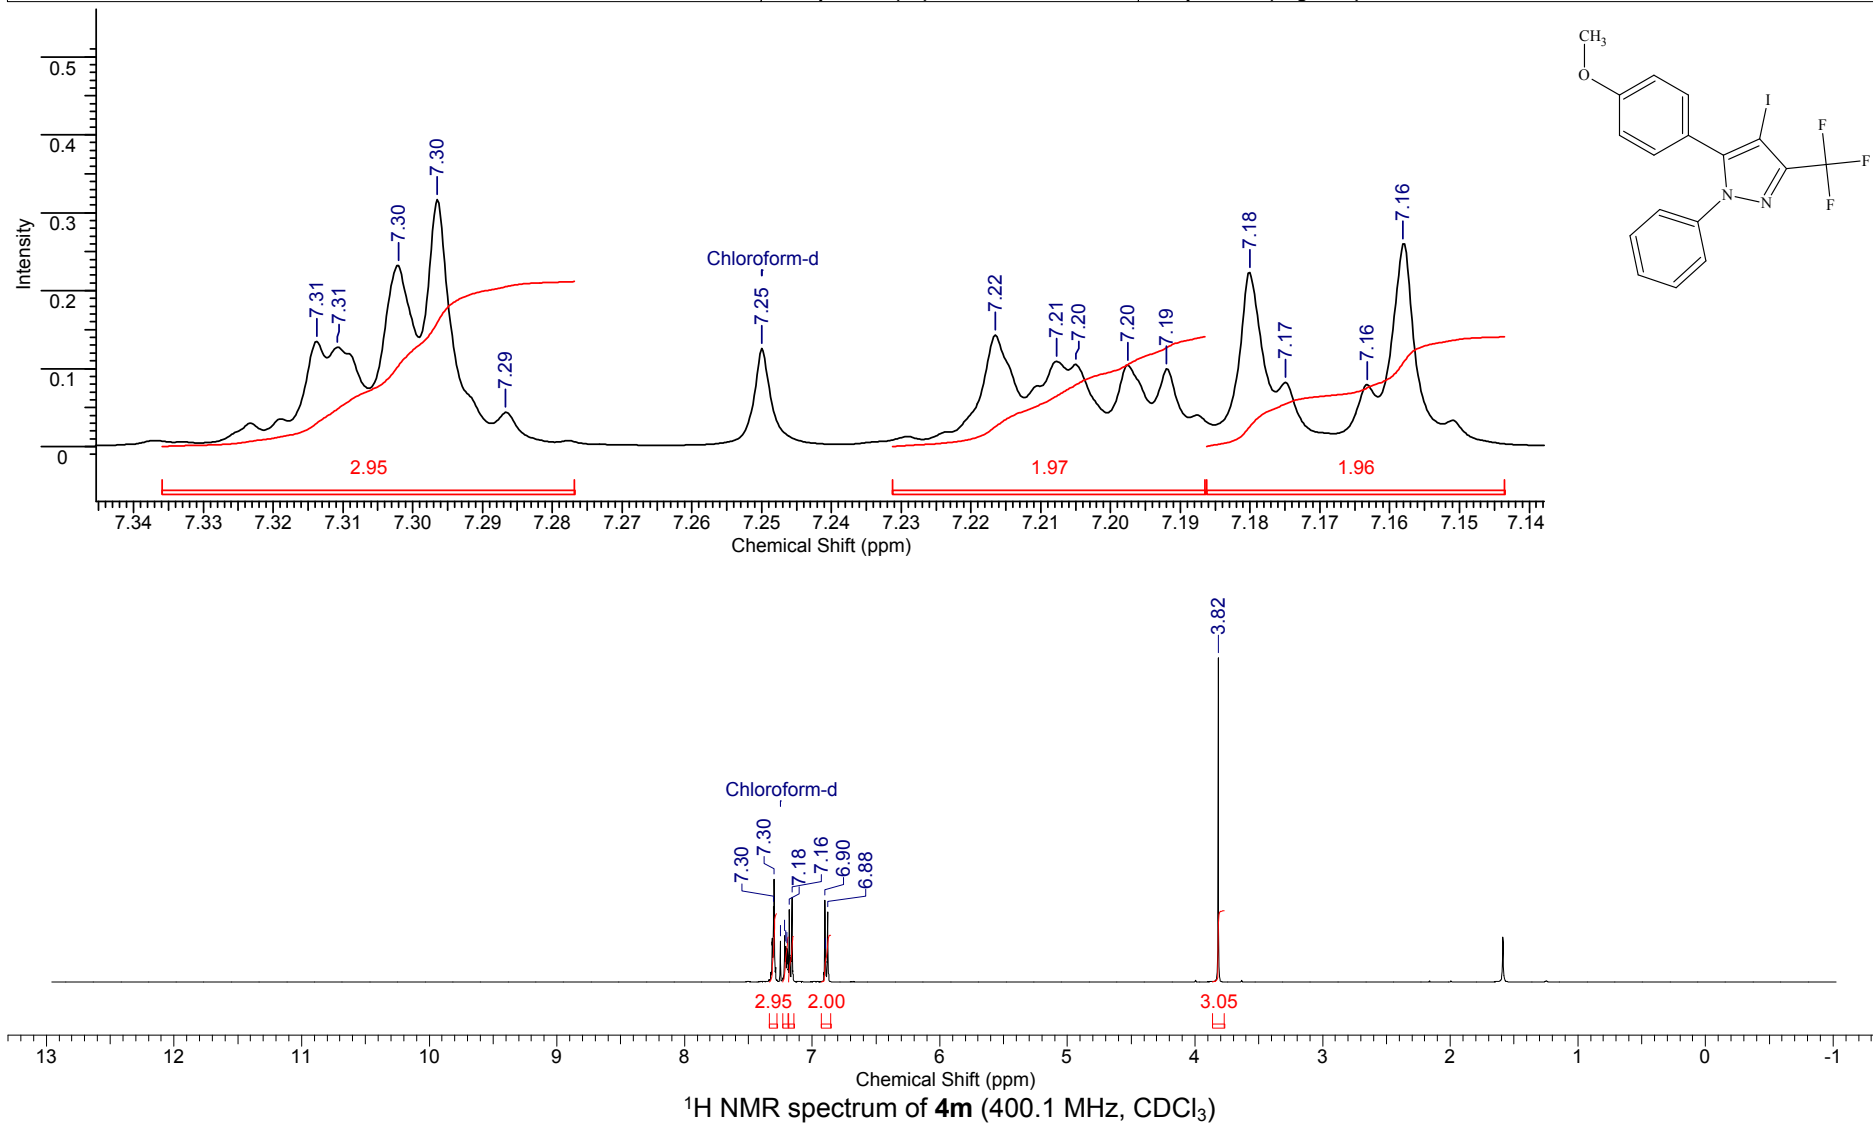

**FW** 444.1897 **Formula** C<sub>17</sub>H<sub>12</sub>F<sub>3</sub>IN<sub>2</sub>O

|                               |                                              |                              |                      |                               |                      |
|-------------------------------|----------------------------------------------|------------------------------|----------------------|-------------------------------|----------------------|
| <b>Acquisition Time (sec)</b> | 0.4999                                       | <b>Comment</b>               | Imported from UXNMR. | <b>Date</b>                   | 25 May 2017 17:43:48 |
| <b>File Name</b>              | D:\BN\output\2017\05.i à à\BM-1076.C_002001r | <b>Frequency (MHz)</b>       | 100.61               | <b>Nucleus</b>                | 13C                  |
| <b>Number of Transients</b>   | 64                                           | <b>Original Points Count</b> | 12076                | <b>Points Count</b>           | 65536                |
| <b>Solvent</b>                | CHLOROFORM-D                                 | <b>Sweep Width (Hz)</b>      | 24154.59             | <b>Pulse Sequence</b>         | zgpg30               |
|                               |                                              |                              |                      | <b>Temperature (degree C)</b> | 27.000               |

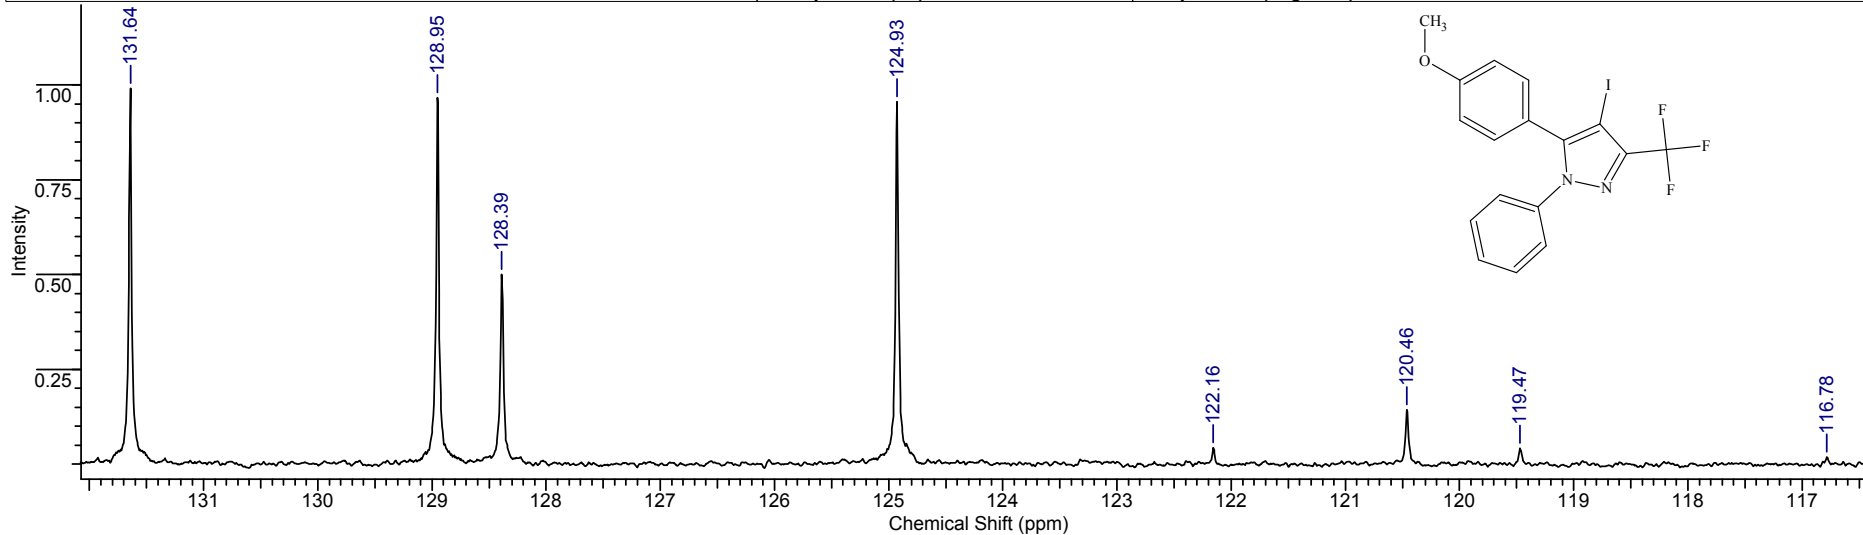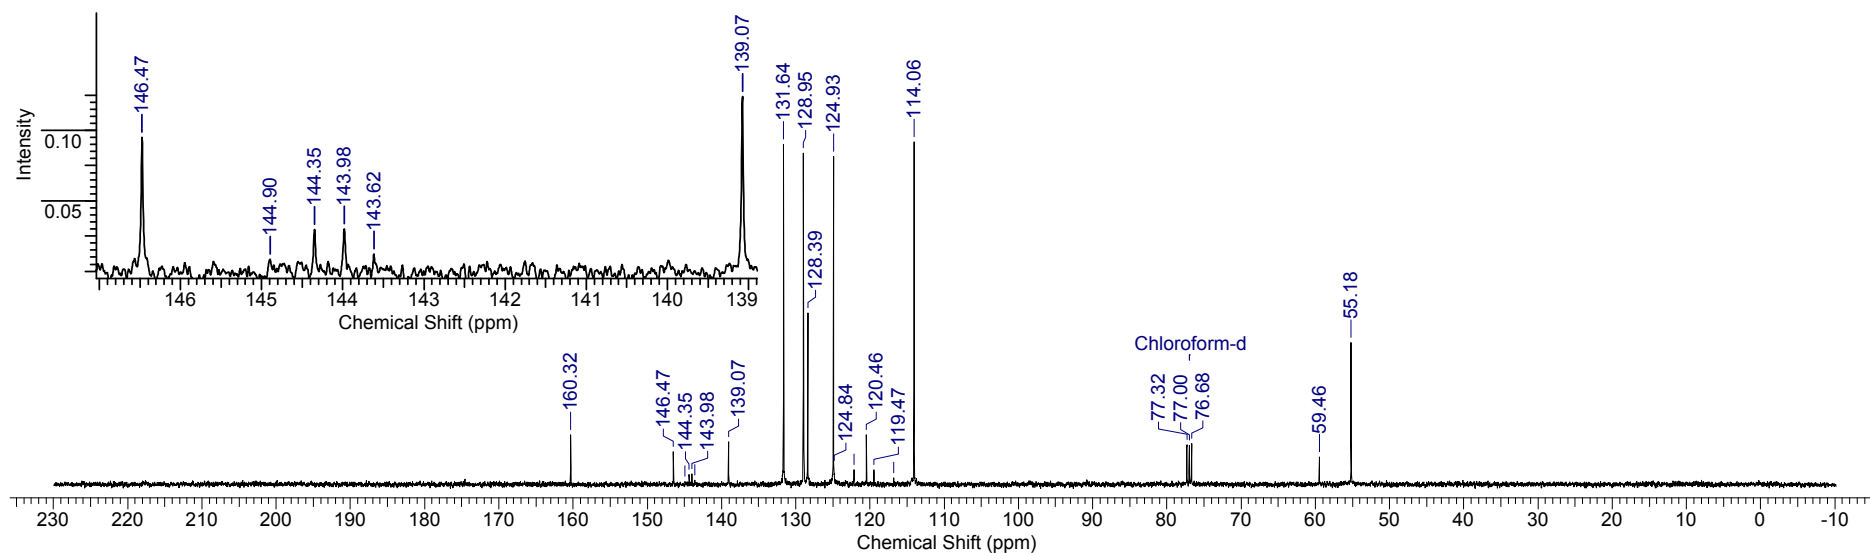

<sup>13</sup>C NMR spectrum of **4m** (100.6 MHz, CDCl<sub>3</sub>)

|           |          |                |                                                                  |
|-----------|----------|----------------|------------------------------------------------------------------|
| <b>FW</b> | 444.1897 | <b>Formula</b> | C <sub>17</sub> H <sub>12</sub> F <sub>3</sub> IN <sub>2</sub> O |
|-----------|----------|----------------|------------------------------------------------------------------|

|                               |        |                       |                 |                             |                                                                    |                              |          |
|-------------------------------|--------|-----------------------|-----------------|-----------------------------|--------------------------------------------------------------------|------------------------------|----------|
| <b>Acquisition Time (sec)</b> | 1.5000 | <b>Date</b>           | May 29 2017     | <b>File Name</b>            | D:\BN\output\F19\F_2017\2017.05.29\BM-1076_20170529_01\FLUORINE_01 |                              |          |
| <b>Frequency (MHz)</b>        | 376.31 | <b>Nucleus</b>        | <sup>19</sup> F | <b>Number of Transients</b> | 16                                                                 | <b>Original Points Count</b> | 133929   |
| <b>Points Count</b>           | 262144 | <b>Pulse Sequence</b> | s2pul           | <b>Solvent</b>              | BENZENE-D6                                                         | <b>Sweep Width (Hz)</b>      | 89285.71 |
| <b>Temperature (degree C)</b> | 25.000 |                       |                 |                             |                                                                    |                              |          |

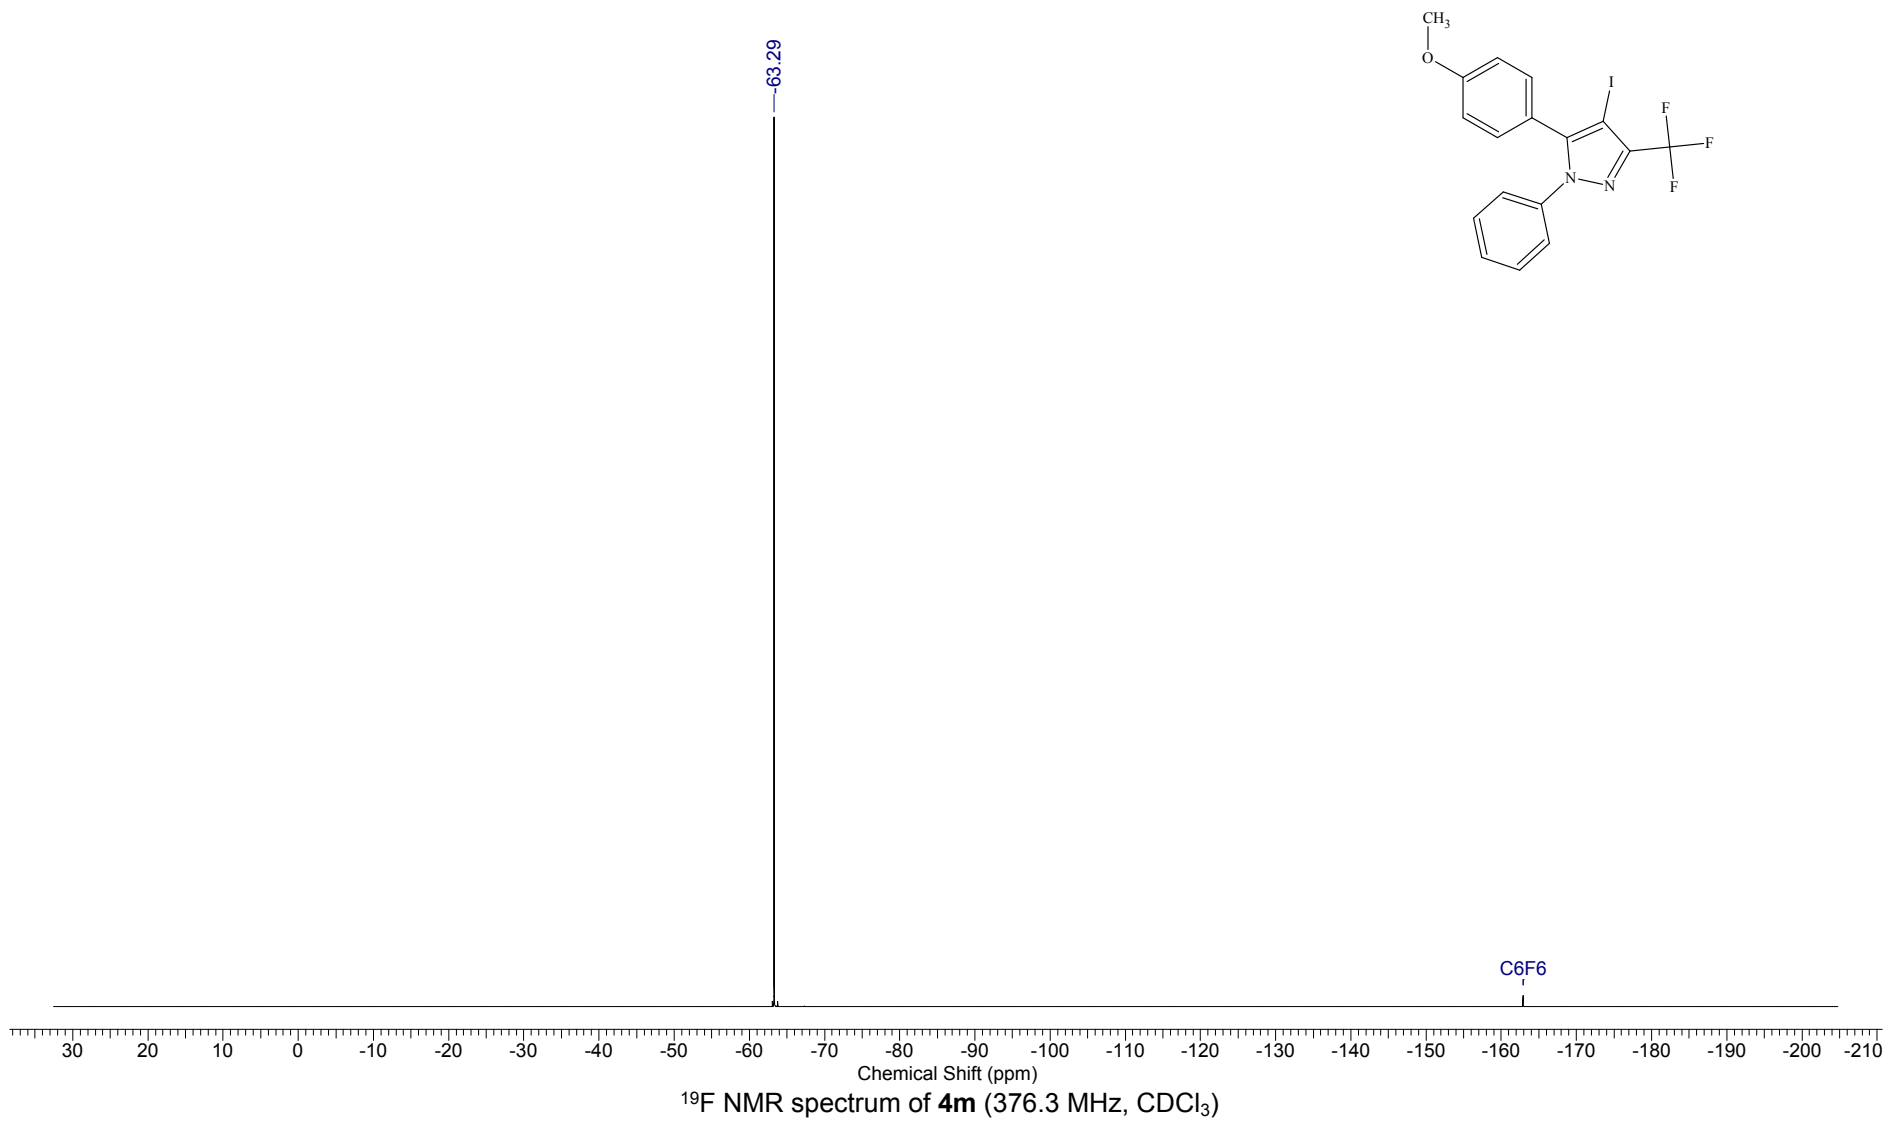



**FW** 460.2563 **Formula** C<sub>17</sub>H<sub>12</sub>F<sub>3</sub>IN<sub>2</sub>S

|                               |                                            |                               |                      |                       |             |                             |              |
|-------------------------------|--------------------------------------------|-------------------------------|----------------------|-----------------------|-------------|-----------------------------|--------------|
| <b>Acquisition Time (sec)</b> | 2.5559                                     | <b>Comment</b>                | Imported from UXNMR. |                       | <b>Date</b> | 02 Jun 2017 15:21:52        |              |
| <b>File Name</b>              | D:\BN\output\2017\06.epi\BM-1098.H_001001r | <b>Frequency (MHz)</b>        | 400.13               | <b>Nucleus</b>        | 1H          | <b>Number of Transients</b> | 4            |
| <b>Original Points Count</b>  | 16384                                      | <b>Points Count</b>           | 65536                | <b>Pulse Sequence</b> | zg30        | <b>Solvent</b>              | CHLOROFORM-D |
| <b>Sweep Width (Hz)</b>       | 6410.26                                    | <b>Temperature (degree C)</b> | 27.000               |                       |             |                             |              |

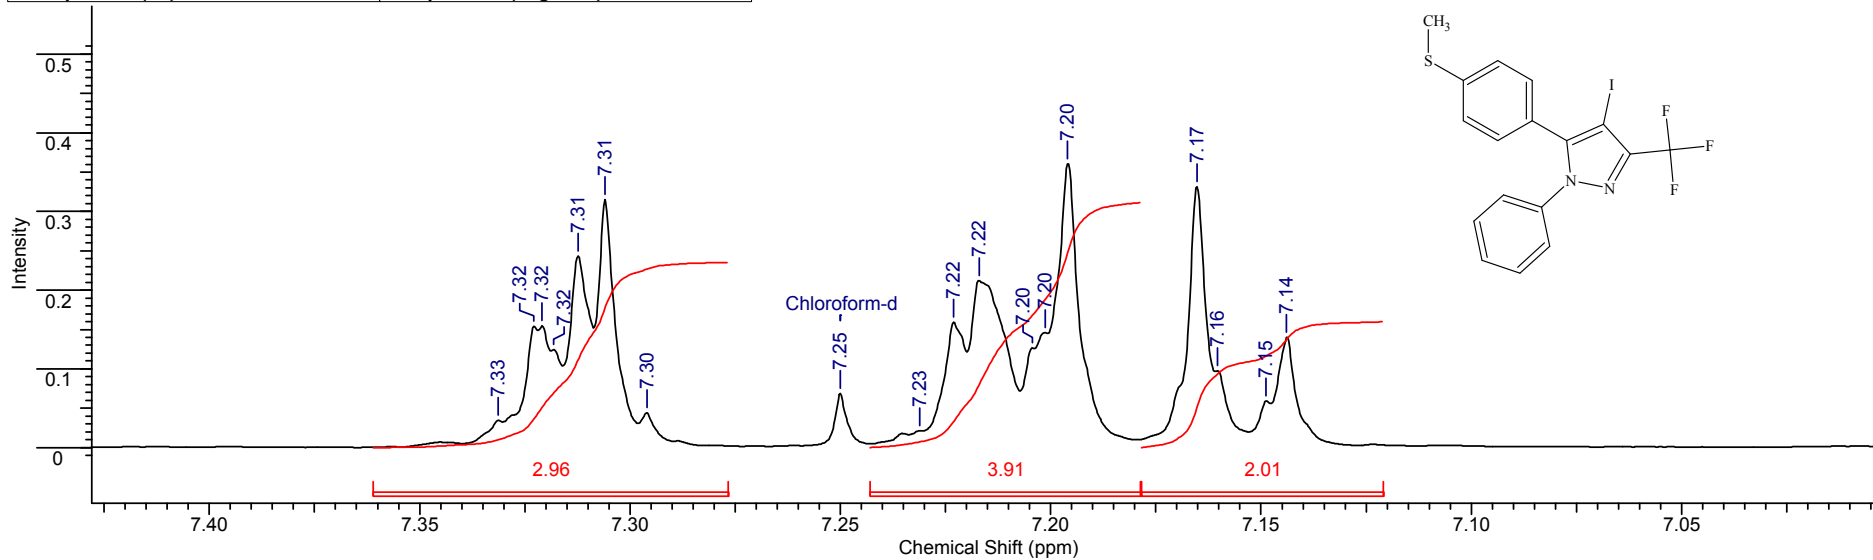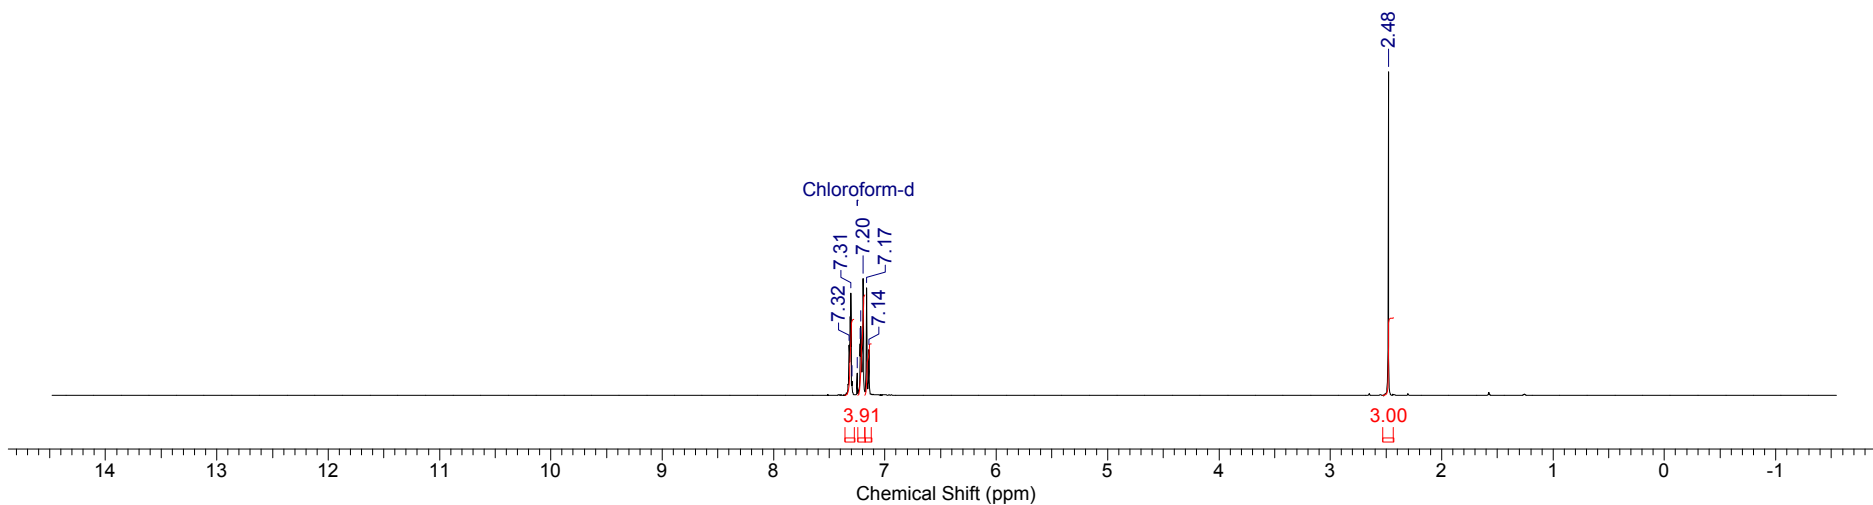

<sup>1</sup>H NMR spectrum of **4n** (400.1 MHz, CDCl<sub>3</sub>)

**FW** 460.2563 **Formula** C<sub>17</sub>H<sub>12</sub>F<sub>3</sub>I<sub>2</sub>S

|                               |                                              |                              |                      |                               |                              |                      |
|-------------------------------|----------------------------------------------|------------------------------|----------------------|-------------------------------|------------------------------|----------------------|
| <b>Acquisition Time (sec)</b> | 0.4999                                       | <b>Comment</b>               | Imported from UXNMR. |                               | <b>Date</b>                  | 02 Jun 2017 15:25:52 |
| <b>File Name</b>              | D:\BN\output\2017\06.ep f \BM-1098.C_002001r | <b>Frequency (MHz)</b>       | 100.61               | <b>Nucleus</b>                | 13C                          |                      |
| <b>Number of Transients</b>   | 128                                          | <b>Original Points Count</b> | 12076                | <b>Points Count</b>           | <b>Pulse Sequence</b> zgpg30 |                      |
| <b>Solvent</b>                | CHLOROFORM-D                                 | <b>Sweep Width (Hz)</b>      | 24154.59             | <b>Temperature (degree C)</b> | 27.000                       |                      |

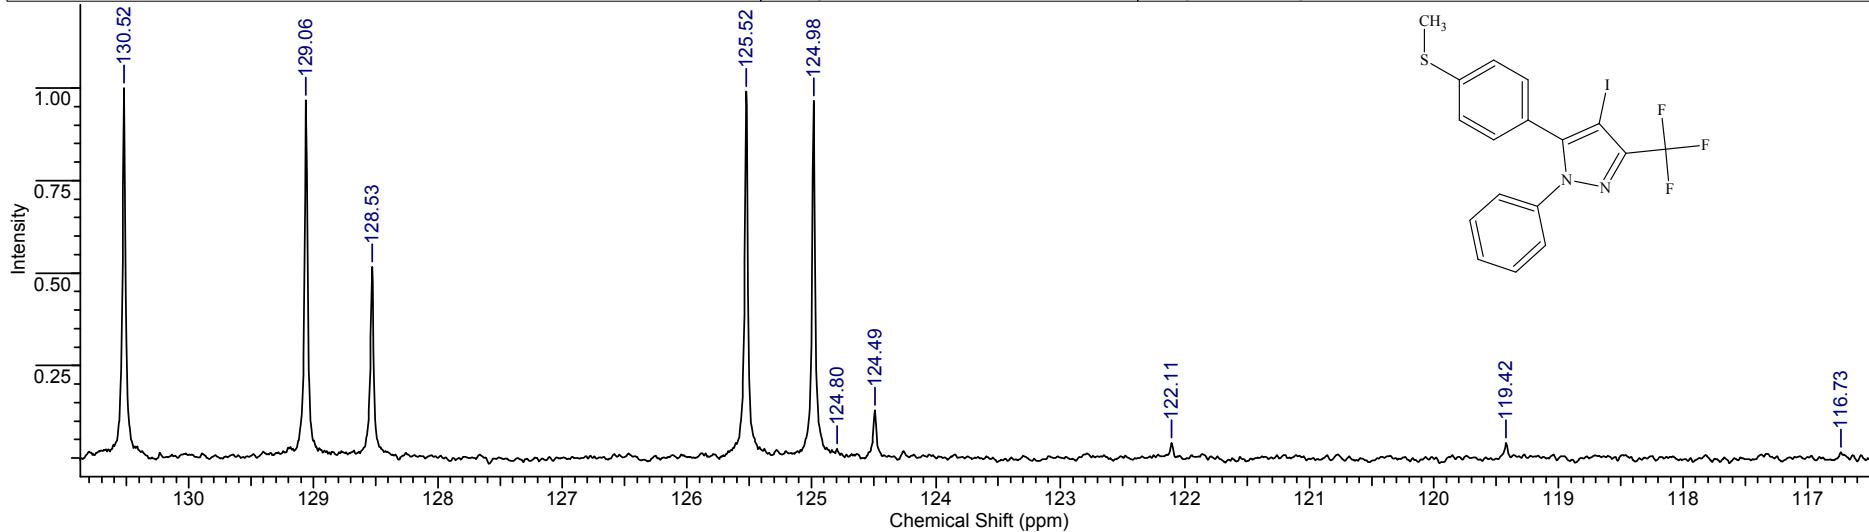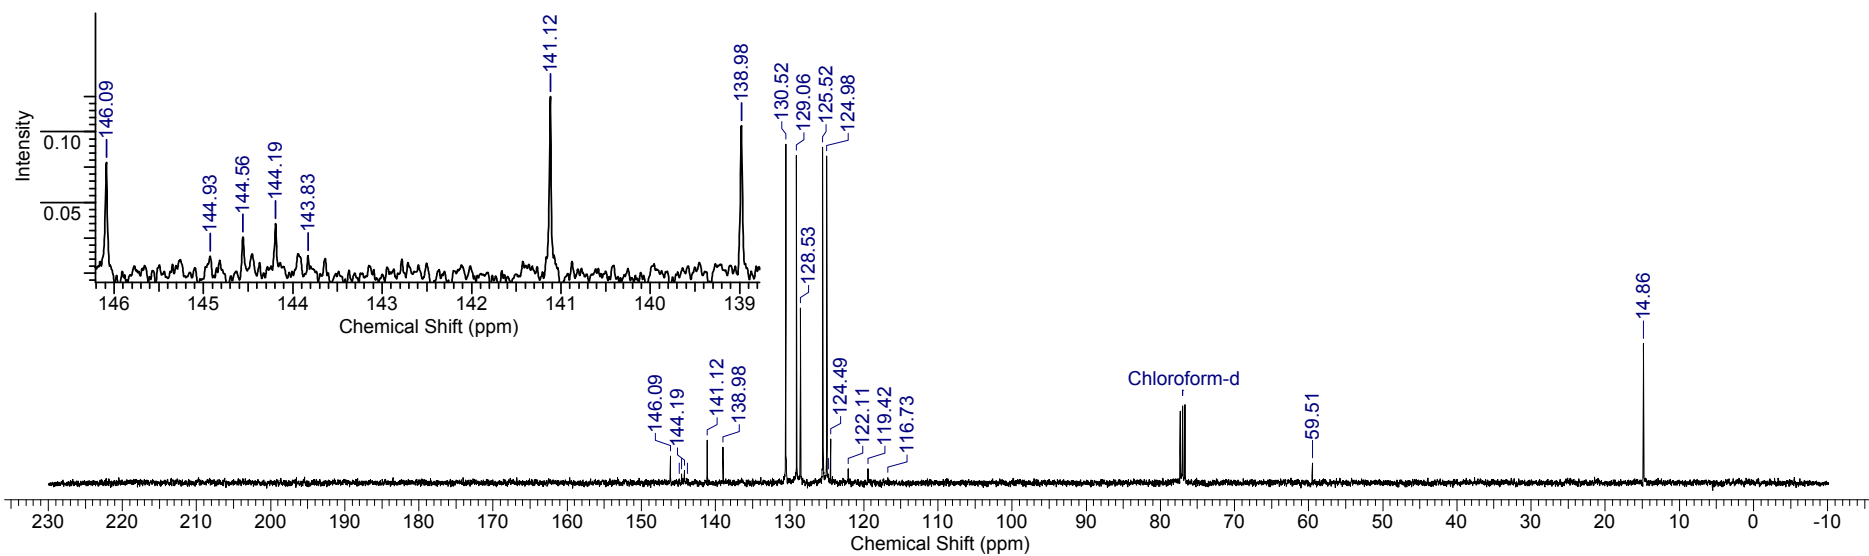

<sup>13</sup>C NMR spectrum of **4n** (100.6 MHz, CDCl<sub>3</sub>)

|           |          |                |                                                                  |
|-----------|----------|----------------|------------------------------------------------------------------|
| <b>FW</b> | 460.2563 | <b>Formula</b> | C <sub>17</sub> H <sub>12</sub> F <sub>3</sub> IN <sub>2</sub> S |
|-----------|----------|----------------|------------------------------------------------------------------|

|                               |          |                               |                 |                             |                                                                    |                              |       |
|-------------------------------|----------|-------------------------------|-----------------|-----------------------------|--------------------------------------------------------------------|------------------------------|-------|
| <b>Acquisition Time (sec)</b> | 0.7340   | <b>Date</b>                   | Jun 7 2017      | <b>File Name</b>            | D:\BN\output\F19\F_2017\2017.06.07\BM-1098_20170607_01\FLUORINE_01 |                              |       |
| <b>Frequency (MHz)</b>        | 376.31   | <b>Nucleus</b>                | <sup>19</sup> F | <b>Number of Transients</b> | 16                                                                 | <b>Original Points Count</b> | 65536 |
| <b>Points Count</b>           | 65536    | <b>Pulse Sequence</b>         | s2pul           | <b>Solvent</b>              | CHLOROFORM-D                                                       |                              |       |
| <b>Sweep Width (Hz)</b>       | 89285.71 | <b>Temperature (degree C)</b> | 25.000          |                             |                                                                    |                              |       |

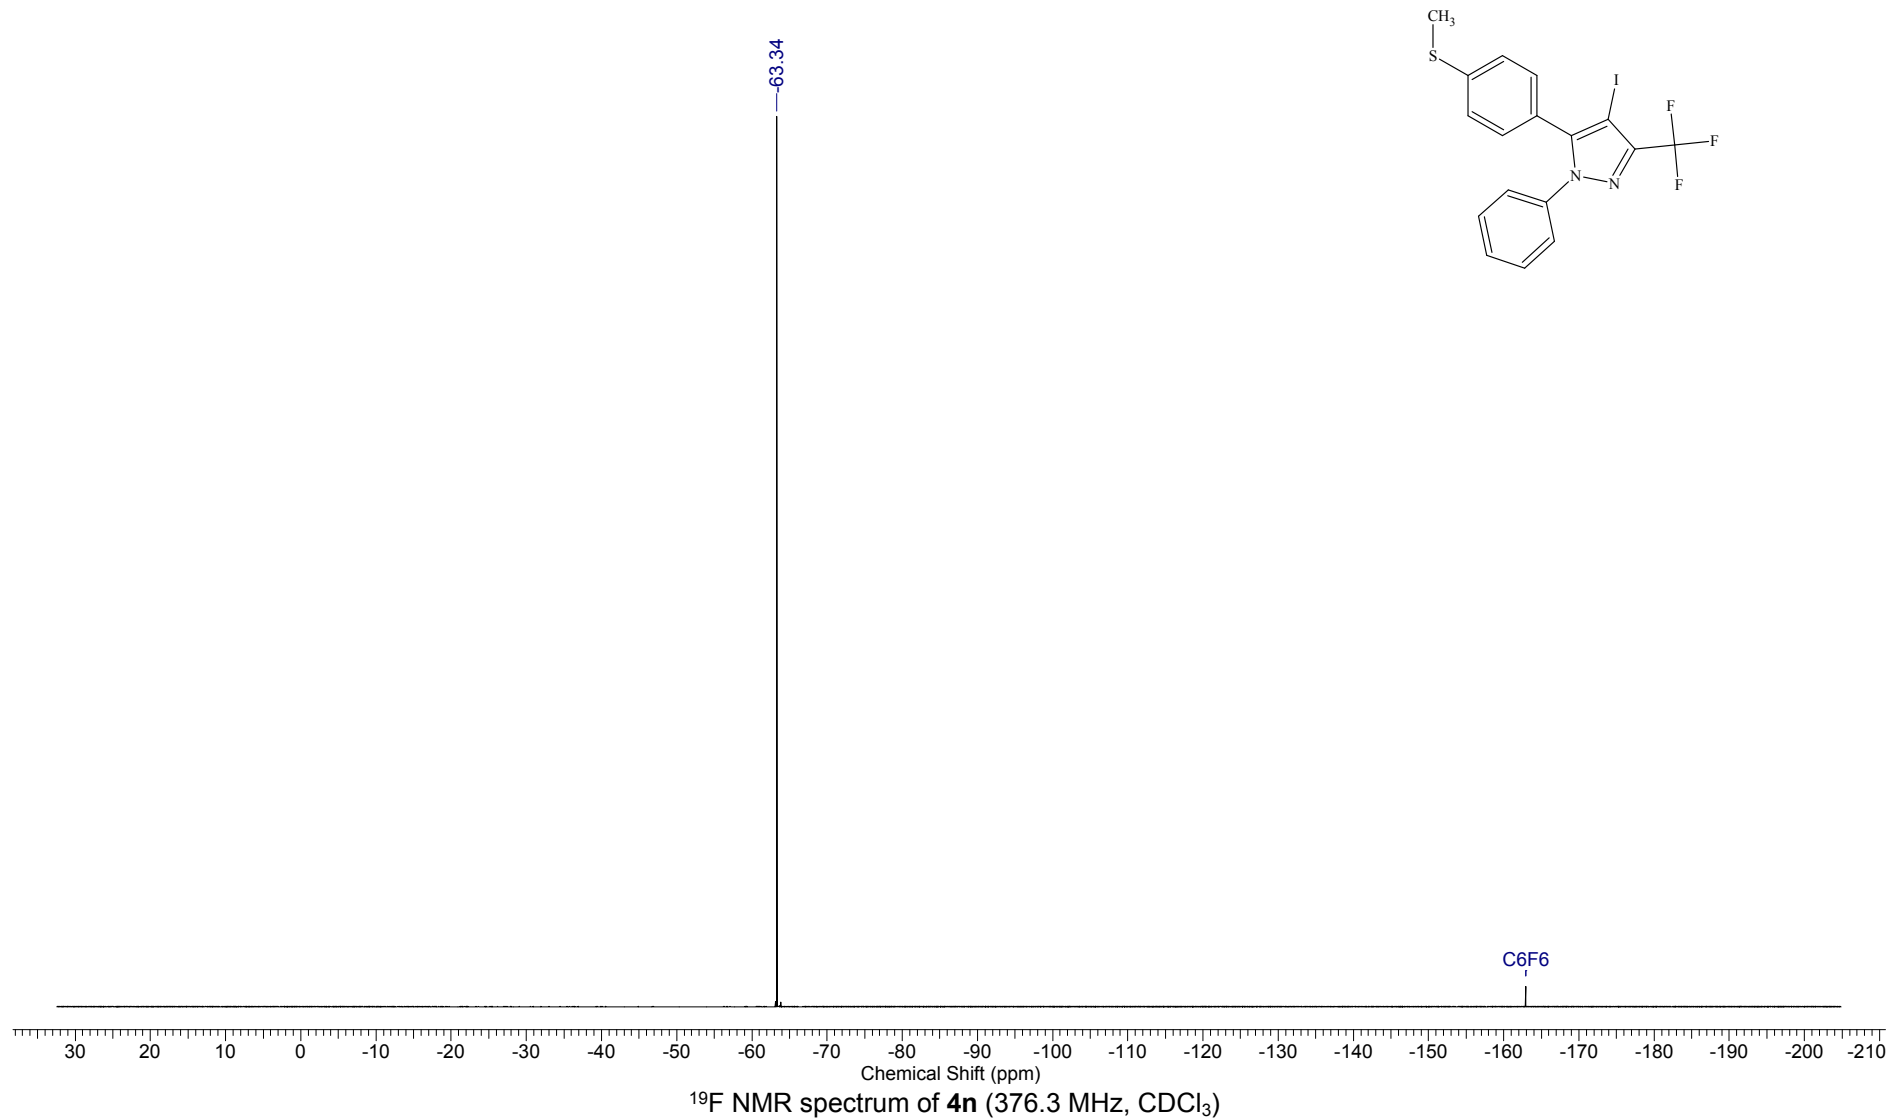

|           |          |                |                                                                  |
|-----------|----------|----------------|------------------------------------------------------------------|
| <b>FW</b> | 494.2484 | <b>Formula</b> | C <sub>21</sub> H <sub>14</sub> F <sub>3</sub> IN <sub>2</sub> O |
|-----------|----------|----------------|------------------------------------------------------------------|

|                               |                                             |                               |                      |                       |             |                             |              |
|-------------------------------|---------------------------------------------|-------------------------------|----------------------|-----------------------|-------------|-----------------------------|--------------|
| <b>Acquisition Time (sec)</b> | 2.5559                                      | <b>Comment</b>                | Imported from UXNMR. |                       | <b>Date</b> | 23 May 2017 15:47:42        |              |
| <b>File Name</b>              | D:\BN\output\2017\05.i àé\BM-1075.H_001001r | <b>Frequency (MHz)</b>        | 400.13               | <b>Nucleus</b>        | 1H          | <b>Number of Transients</b> | 4            |
| <b>Original Points Count</b>  | 16384                                       | <b>Points Count</b>           | 65536                | <b>Pulse Sequence</b> | zg30        | <b>Solvent</b>              | CHLOROFORM-D |
| <b>Sweep Width (Hz)</b>       | 6410.26                                     | <b>Temperature (degree C)</b> | 27.000               |                       |             |                             |              |

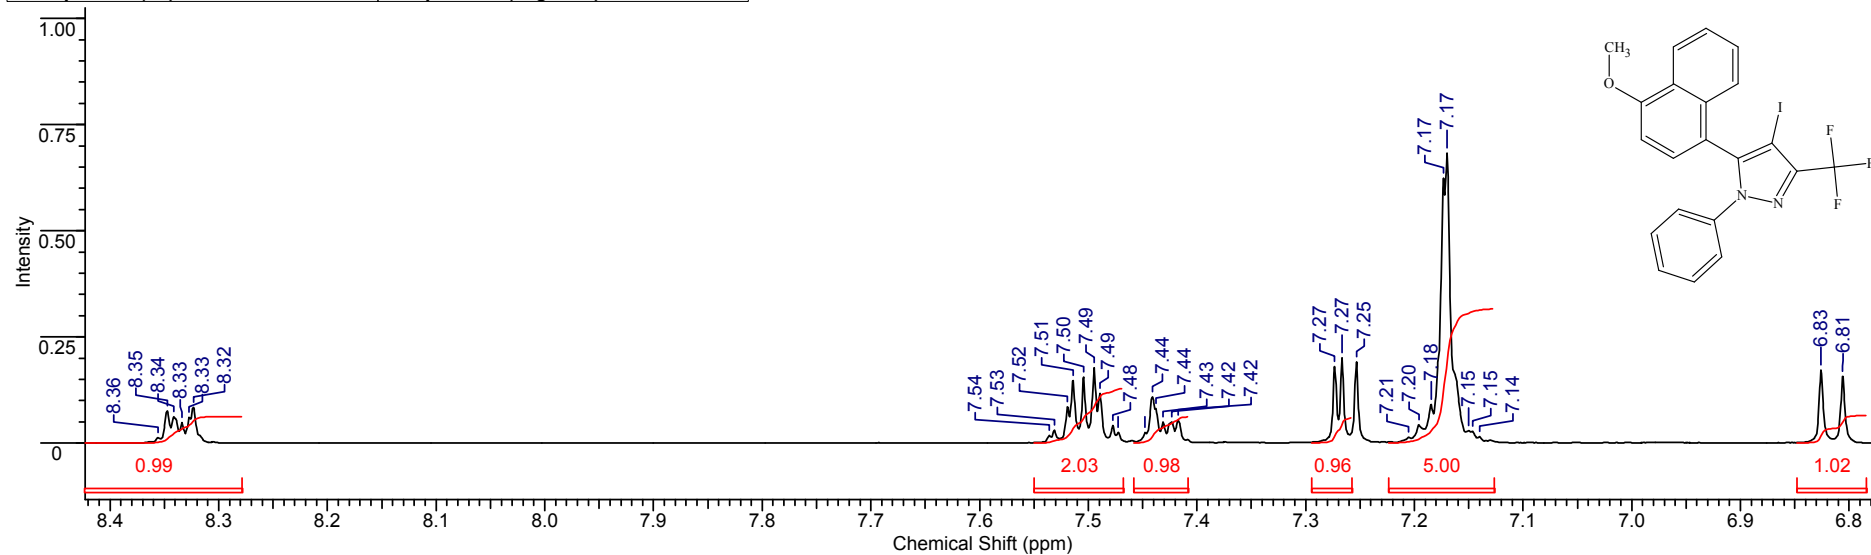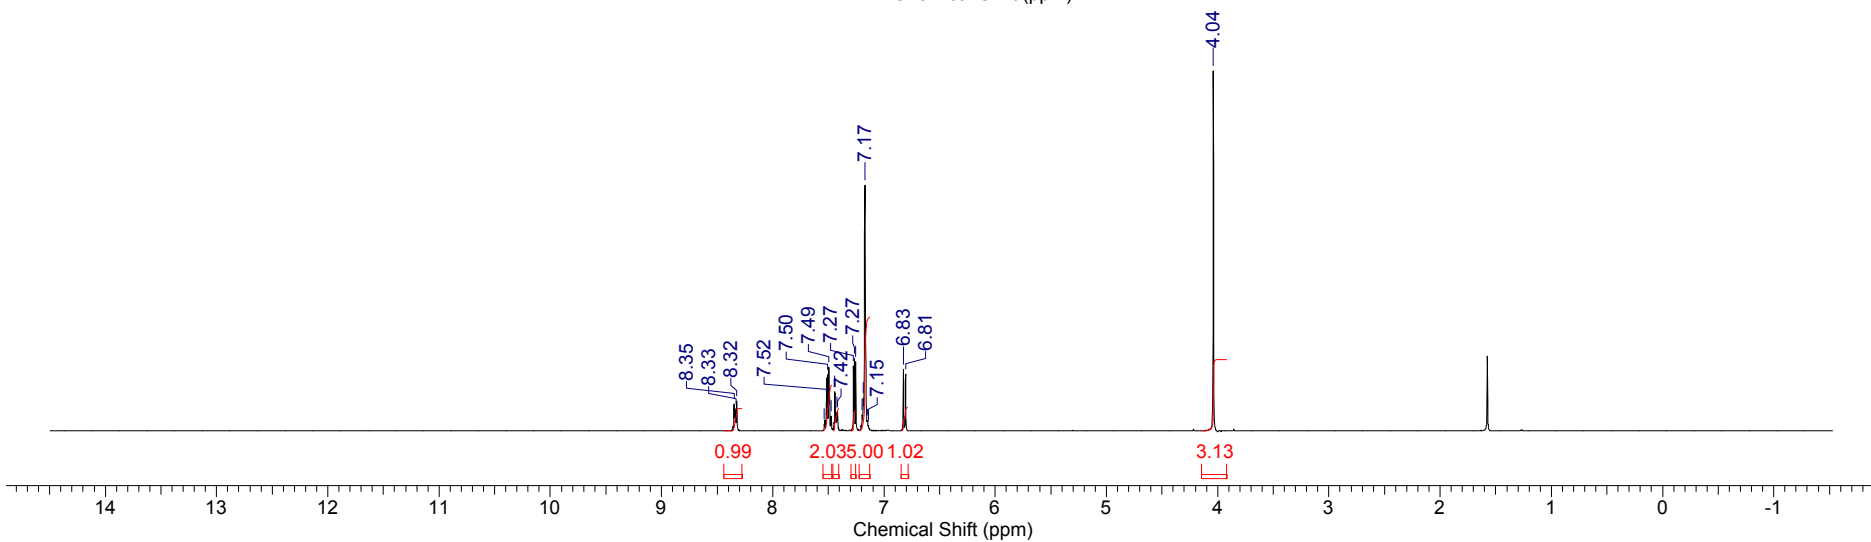

<sup>1</sup>H NMR spectrum of **4o** (400.1 MHz, CDCl<sub>3</sub>)

**FW** 494.2484 **Formula** C<sub>21</sub>H<sub>14</sub>F<sub>3</sub>IN<sub>2</sub>O

|                               |                                            |                              |                      |                               |                      |
|-------------------------------|--------------------------------------------|------------------------------|----------------------|-------------------------------|----------------------|
| <b>Acquisition Time (sec)</b> | 0.4999                                     | <b>Comment</b>               | Imported from UXMNR. | <b>Date</b>                   | 24 May 2017 17:20:48 |
| <b>File Name</b>              | D:\BN\output\2017\05.i à\BM-1075.C_002001r | <b>Frequency (MHz)</b>       | 100.61               | <b>Nucleus</b>                | 13C                  |
| <b>Number of Transients</b>   | 174                                        | <b>Original Points Count</b> | 12076                | <b>Points Count</b>           | 65536                |
| <b>Solvent</b>                | CHLOROFORM-D                               | <b>Sweep Width (Hz)</b>      | 24154.59             | <b>Pulse Sequence</b>         | zgpg30               |
|                               |                                            |                              |                      | <b>Temperature (degree C)</b> | 27.000               |

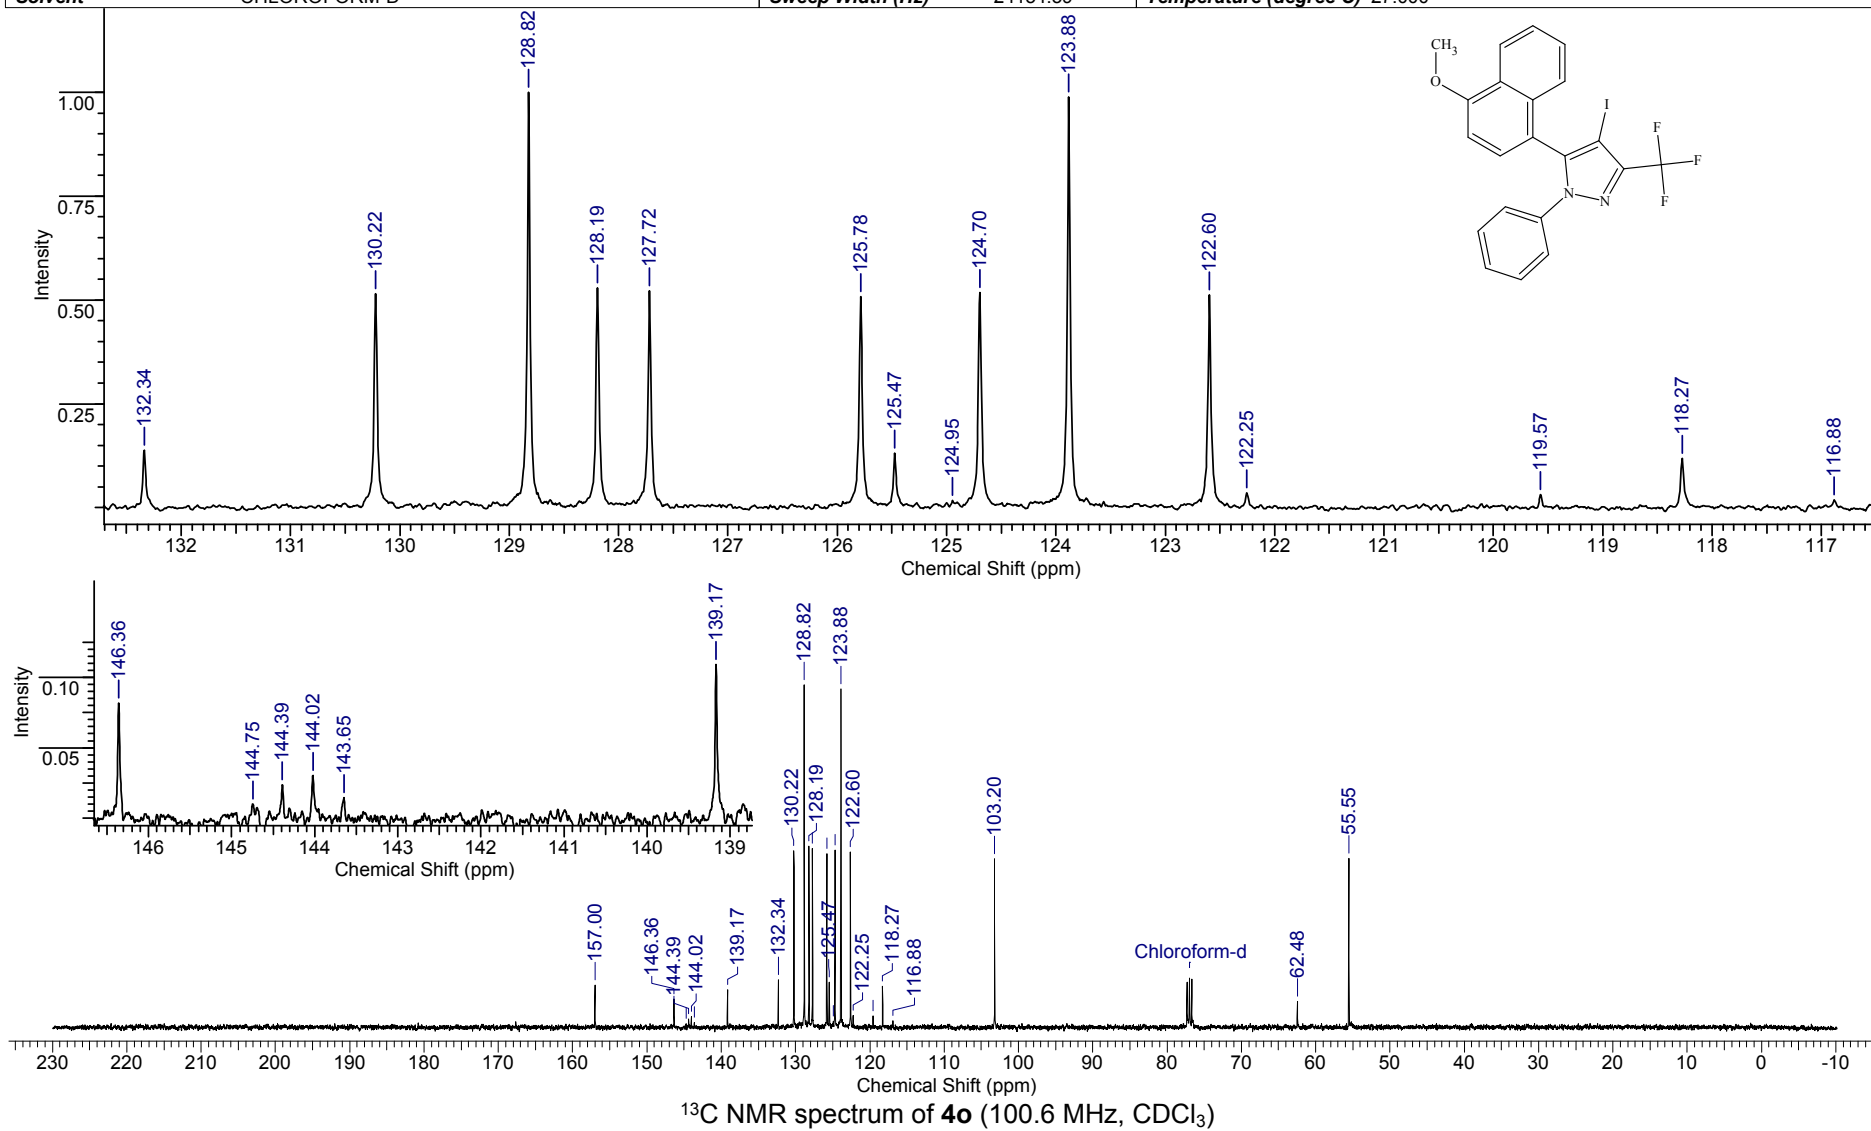

|           |          |                |                                                                  |
|-----------|----------|----------------|------------------------------------------------------------------|
| <b>FW</b> | 494.2484 | <b>Formula</b> | C <sub>21</sub> H <sub>14</sub> F <sub>3</sub> IN <sub>2</sub> O |
|-----------|----------|----------------|------------------------------------------------------------------|

|                               |        |                       |                 |                             |                                                                    |                              |          |
|-------------------------------|--------|-----------------------|-----------------|-----------------------------|--------------------------------------------------------------------|------------------------------|----------|
| <b>Acquisition Time (sec)</b> | 1.5000 | <b>Date</b>           | May 29 2017     | <b>File Name</b>            | D:\BN\output\F19\F_2017\2017.05.29\BM-1075_20170529_01\FLUORINE_01 |                              |          |
| <b>Frequency (MHz)</b>        | 376.31 | <b>Nucleus</b>        | <sup>19</sup> F | <b>Number of Transients</b> | 16                                                                 | <b>Original Points Count</b> | 133929   |
| <b>Points Count</b>           | 262144 | <b>Pulse Sequence</b> | s2pul           | <b>Solvent</b>              | BENZENE-D6                                                         | <b>Sweep Width (Hz)</b>      | 89285.71 |
| <b>Temperature (degree C)</b> | 25.000 |                       |                 |                             |                                                                    |                              |          |

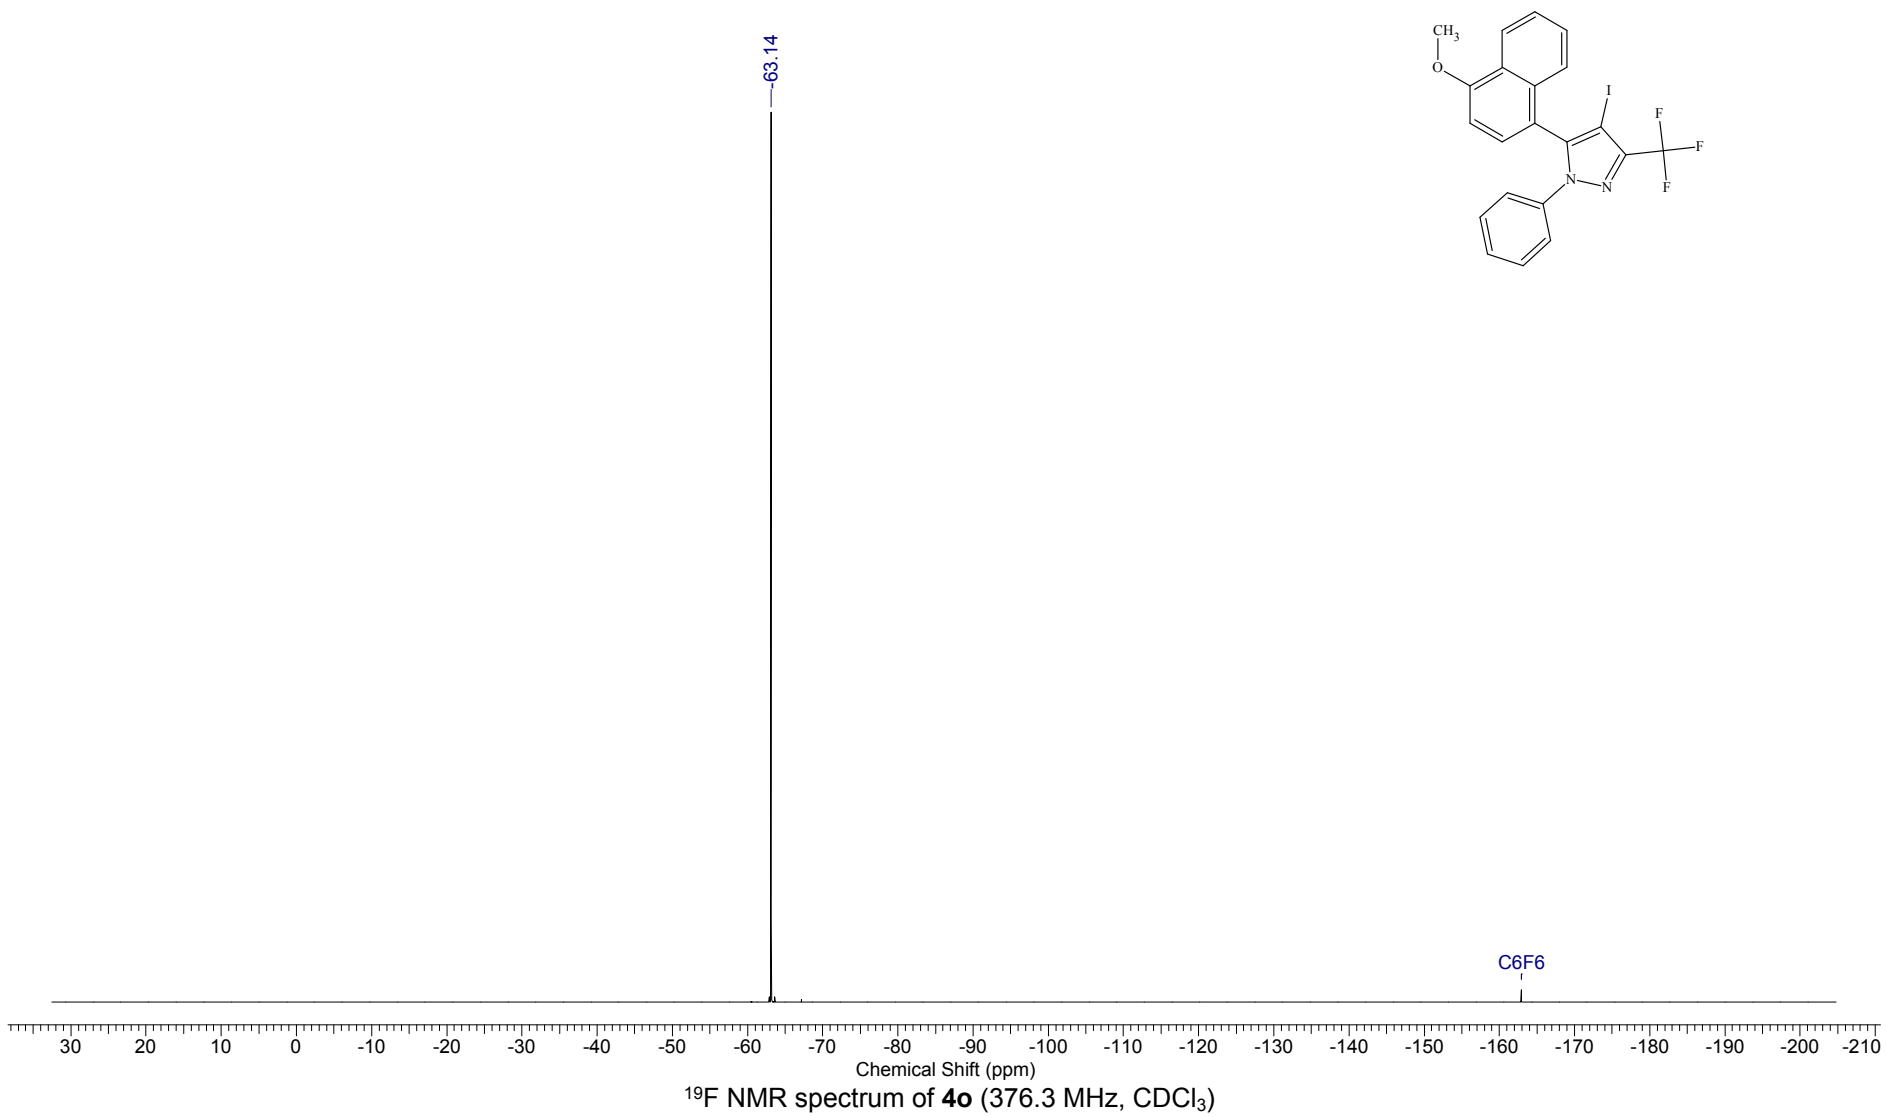

**FW** 549.3496      **Formula** C<sub>20</sub>H<sub>19</sub>F<sub>3</sub>IN<sub>3</sub>O<sub>2</sub>S

|                               |                                               |                               |                      |                               |                      |
|-------------------------------|-----------------------------------------------|-------------------------------|----------------------|-------------------------------|----------------------|
| <b>Acquisition Time (sec)</b> | 2.5559                                        | <b>Comment</b>                | Imported from UXNMR. | <b>Date</b>                   | 17 Apr 2014 18:38:56 |
| <b>File Name</b>              | C:\IBM_DATA\DOCS\SPEC_BM_H\CIBM-476.H_001001r | <b>Frequency (MHz)</b>        | 400.13               | <b>Nucleus</b>                | <sup>1</sup> H       |
| <b>Number of Transients</b>   | 4                                             | <b>Original Points Count</b>  | 16384                | <b>Points Count</b>           | 65536                |
| <b>Solvent</b>                | CHLOROFORM-D                                  | <b>Sweep Width (Hz)</b>       | 6410.26              | <b>Pulse Sequence</b>         | zg30                 |
|                               |                                               | <b>Temperature (degree C)</b> |                      | <b>Temperature (degree C)</b> | 27.000               |

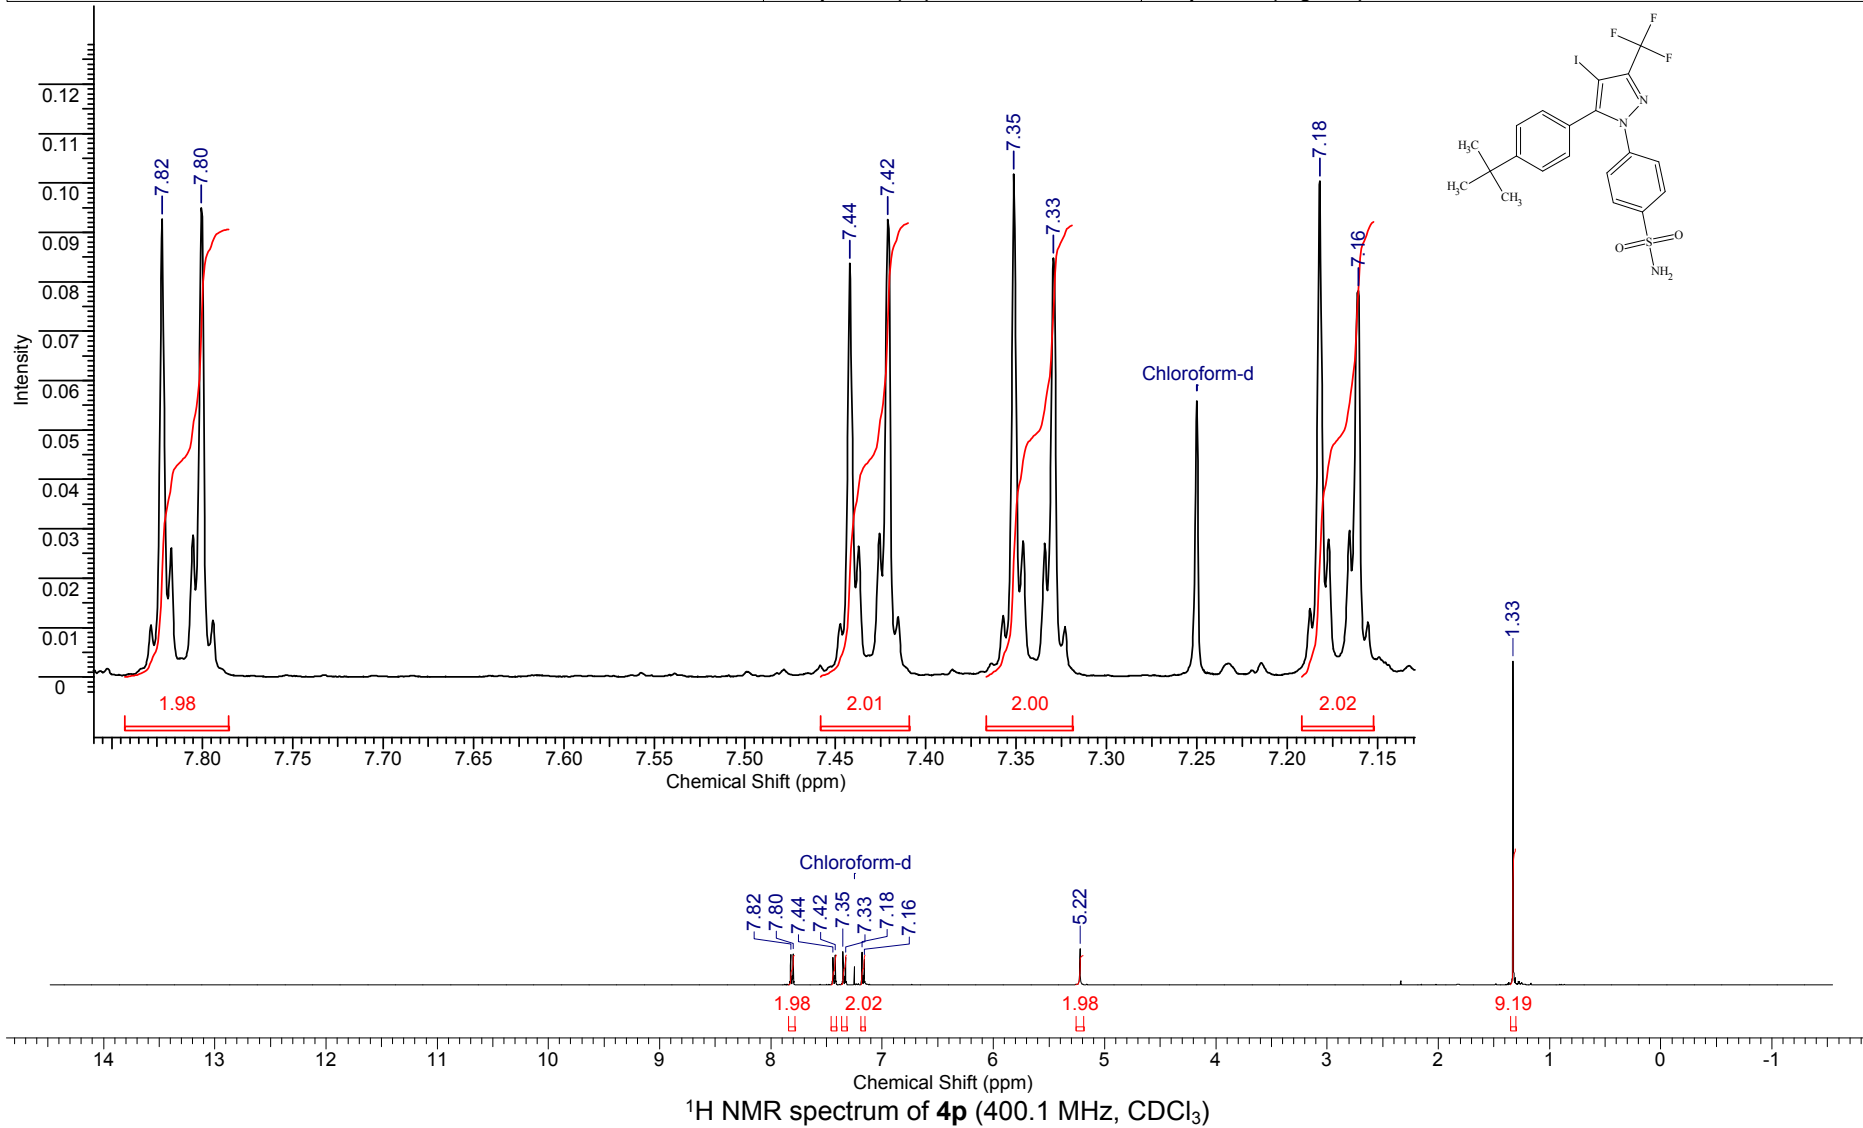

|           |          |                |                                                                                 |
|-----------|----------|----------------|---------------------------------------------------------------------------------|
| <b>FW</b> | 549.3496 | <b>Formula</b> | C <sub>20</sub> H <sub>19</sub> F <sub>3</sub> IN <sub>3</sub> O <sub>2</sub> S |
|-----------|----------|----------------|---------------------------------------------------------------------------------|

|                               |                                              |                              |                      |                               |             |                      |
|-------------------------------|----------------------------------------------|------------------------------|----------------------|-------------------------------|-------------|----------------------|
| <b>Acquisition Time (sec)</b> | 0.4999                                       | <b>Comment</b>               | Imported from UXNMR. |                               | <b>Date</b> | 17 Apr 2014 18:48:16 |
| <b>File Name</b>              | C:\BM_DATA\DOCS\SPEC_BM_H,C\BM-476.C_002001r | <b>Frequency (MHz)</b>       | 100.61               | <b>Nucleus</b>                | 13C         |                      |
| <b>Number of Transients</b>   | 256                                          | <b>Original Points Count</b> | 12076                | <b>Points Count</b>           | 65536       |                      |
| <b>Solvent</b>                | CHLOROFORM-D                                 | <b>Sweep Width (Hz)</b>      | 24154.59             | <b>Pulse Sequence</b>         | zpgp30      |                      |
|                               |                                              |                              |                      | <b>Temperature (degree C)</b> | 27.000      |                      |

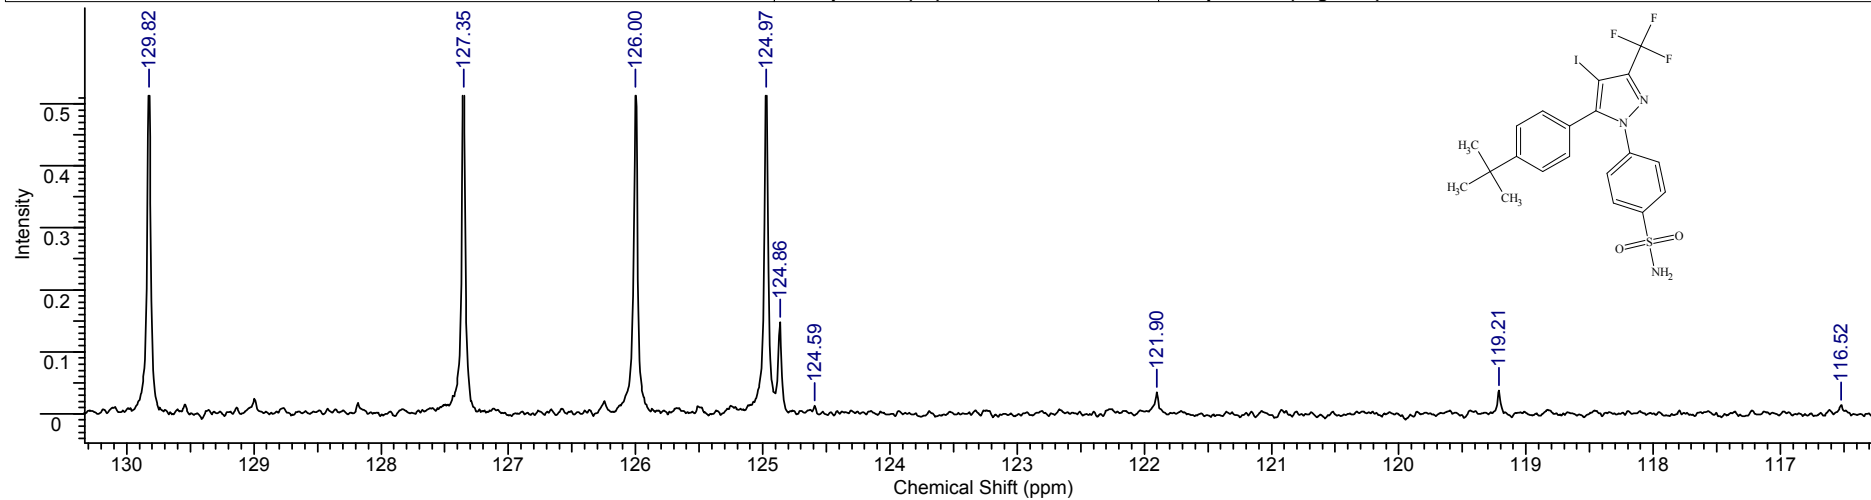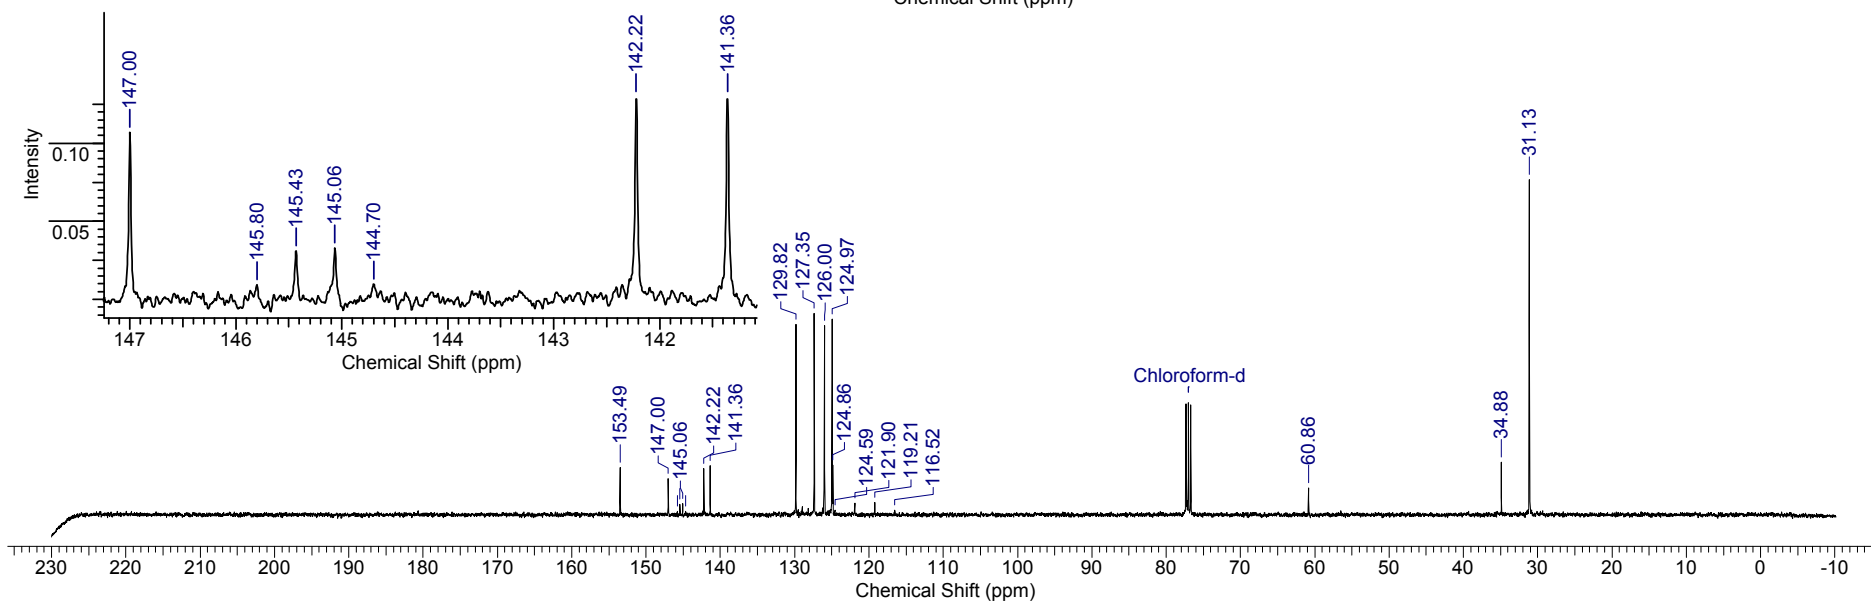

<sup>13</sup>C NMR spectrum of **4p** (100.6 MHz, CDCl<sub>3</sub>)



|           |          |                |                                                                                 |
|-----------|----------|----------------|---------------------------------------------------------------------------------|
| <b>FW</b> | 549.3496 | <b>Formula</b> | C <sub>20</sub> H <sub>19</sub> F <sub>3</sub> IN <sub>3</sub> O <sub>2</sub> S |
|-----------|----------|----------------|---------------------------------------------------------------------------------|

|                               |          |                               |             |                             |                                                         |                              |       |
|-------------------------------|----------|-------------------------------|-------------|-----------------------------|---------------------------------------------------------|------------------------------|-------|
| <b>Acquisition Time (sec)</b> | 1.0000   | <b>Date</b>                   | Apr 11 2014 | <b>File Name</b>            | C:\BM_DATA\DOCS\SPEC_BM_FBM-476_20140411_01\FLUORINE_01 |                              |       |
| <b>Frequency (MHz)</b>        | 376.31   | <b>Nucleus</b>                | 19F         | <b>Number of Transients</b> | 8                                                       | <b>Original Points Count</b> | 89286 |
| <b>Points Count</b>           | 131072   | <b>Pulse Sequence</b>         | s2pul       | <b>Solvent</b>              | CHLOROFORM-D                                            |                              |       |
| <b>Sweep Width (Hz)</b>       | 89285.71 | <b>Temperature (degree C)</b> | 30.000      |                             |                                                         |                              |       |

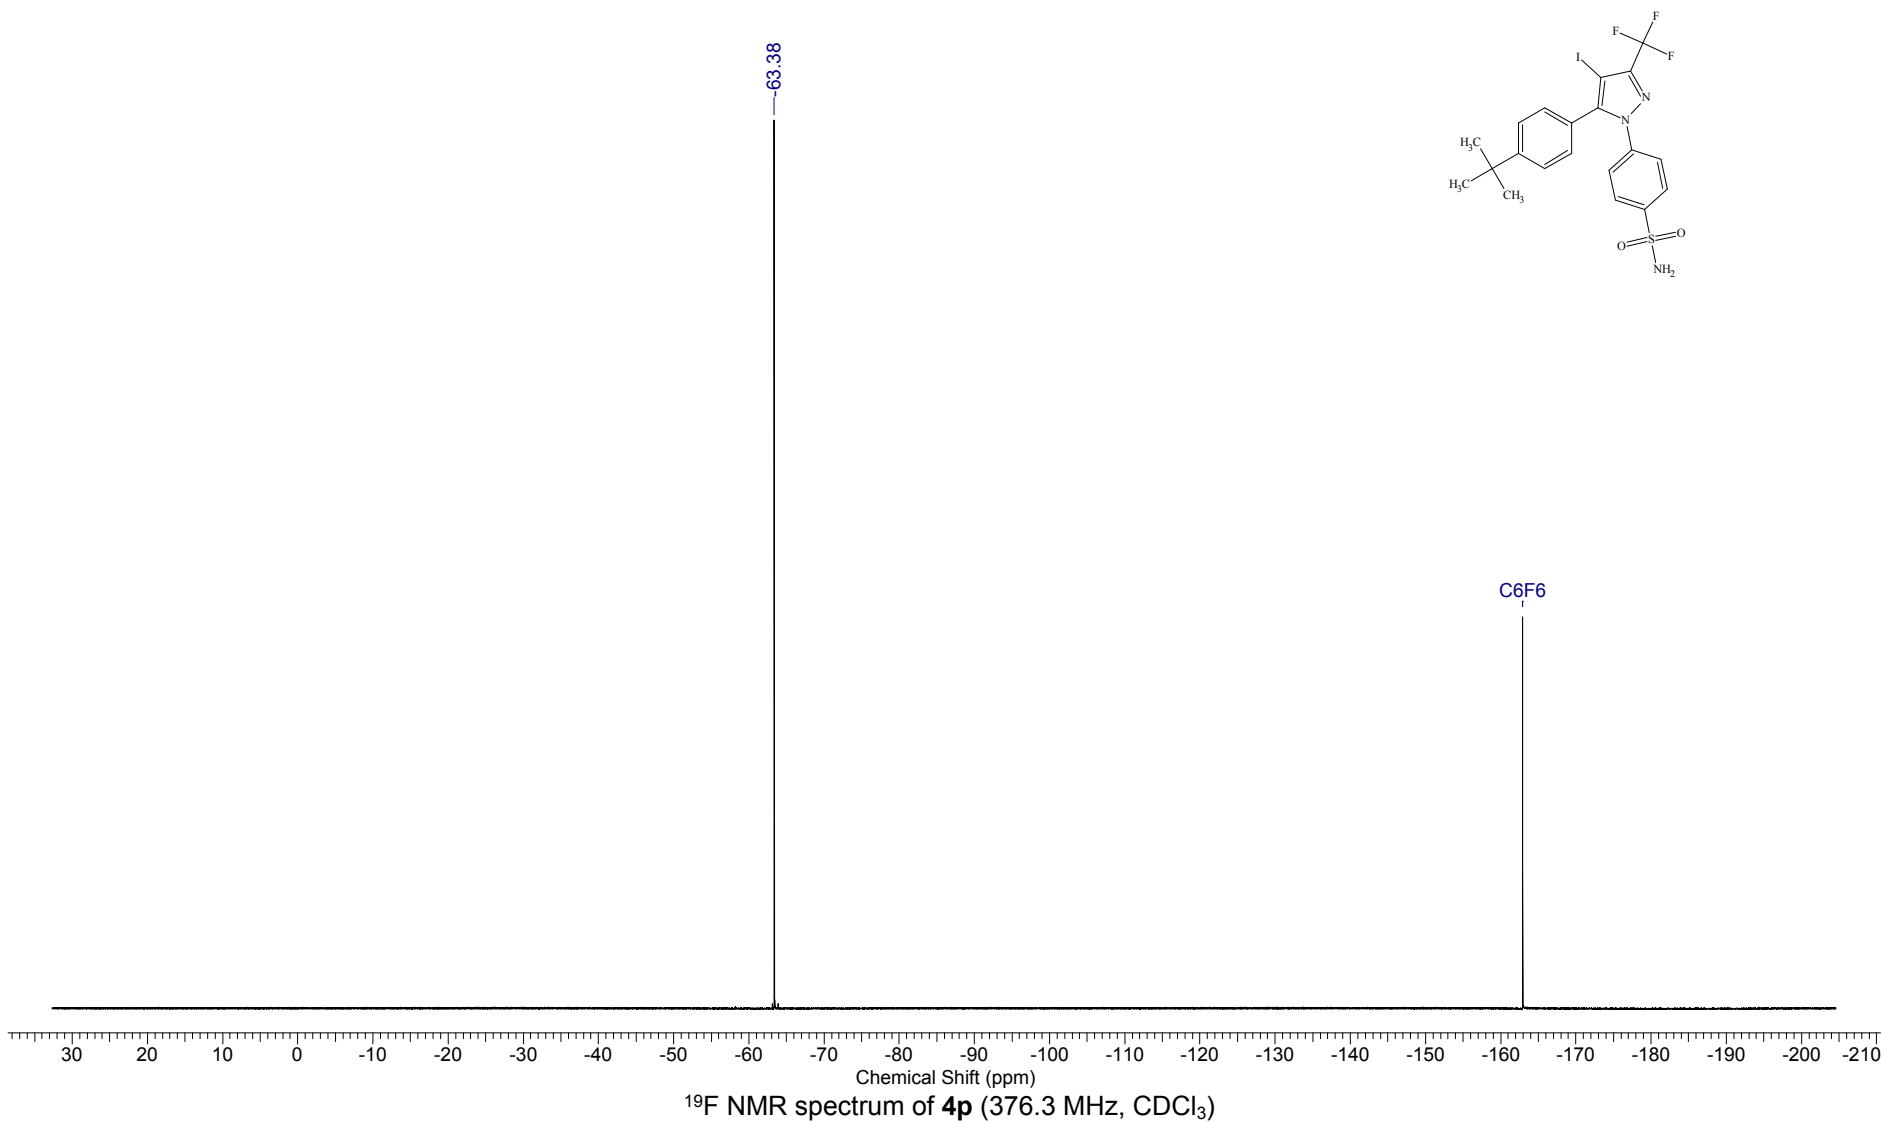

FW 507.2698 Formula C<sub>17</sub>H<sub>13</sub>F<sub>3</sub>IN<sub>3</sub>O<sub>2</sub>S

|                        |                                              |                       |                      |                        |                      |
|------------------------|----------------------------------------------|-----------------------|----------------------|------------------------|----------------------|
| Acquisition Time (sec) | 2.5559                                       | Comment               | Imported from UXMNR. | Date                   | 19 Jun 2014 18:58:36 |
| File Name              | C:\BM_DATA\DOCS\SPEC_BM_H\CIBM-508.H_001001r | Frequency (MHz)       | 400.13               | Nucleus                | <sup>1</sup> H       |
| Number of Transients   | 4                                            | Original Points Count | 16384                | Points Count           | 65536                |
| Solvent                | DEUTERIUM OXIDE                              | Sweep Width (Hz)      | 6410.26              | Pulse Sequence         | zg30                 |
|                        |                                              |                       |                      | Temperature (degree C) | 27.000               |

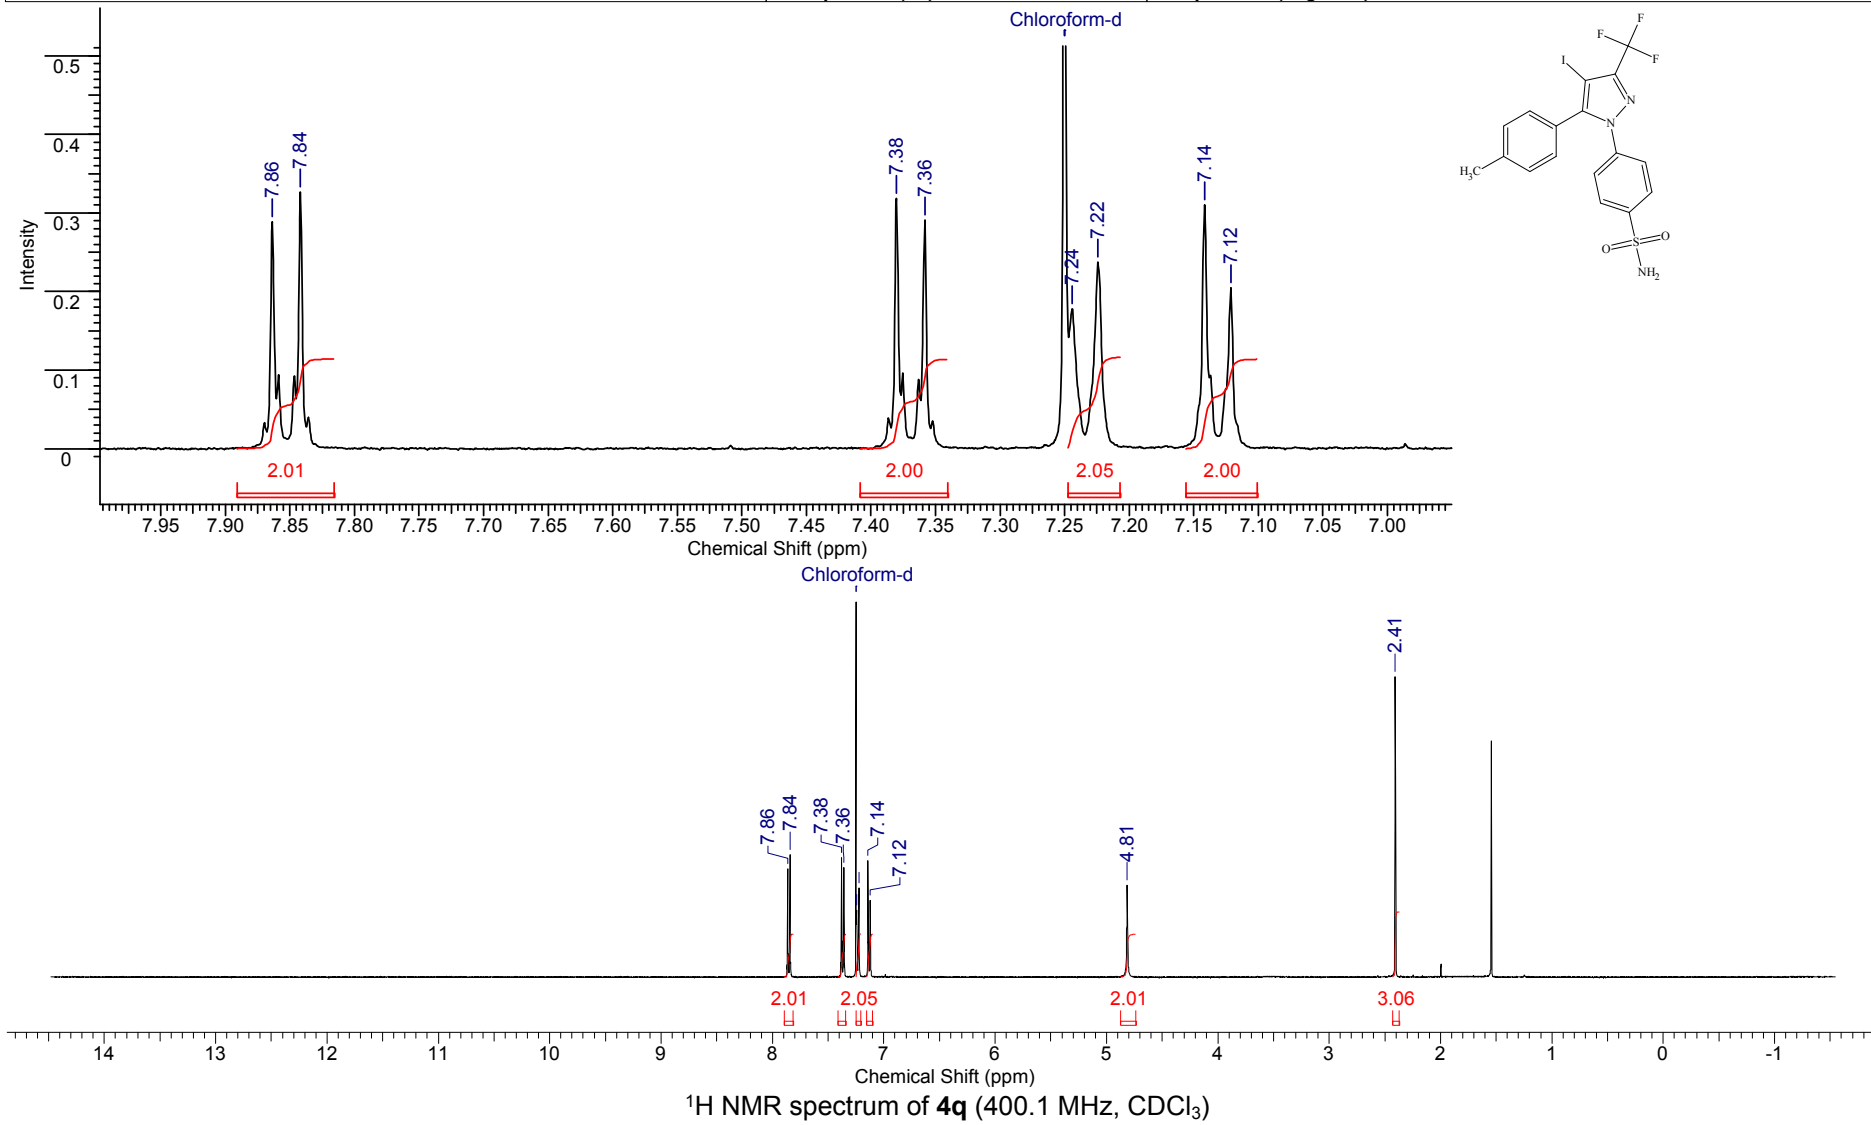

FW 507.2698      Formula C<sub>17</sub>H<sub>13</sub>F<sub>3</sub>IN<sub>3</sub>O<sub>2</sub>S

| Acquisition Time (sec) | 2.5559                                        | Comment          | Imported from UXMNR. |                | Date | 07 Jun 2014 20:29:48 |         |
|------------------------|-----------------------------------------------|------------------|----------------------|----------------|------|----------------------|---------|
| File Name              | C:\IBM_DATA\DOCS\SPEC_BM_H\CIBM-499.H_001001r | Frequency (MHz)  | 400.13               | Nucleus        | 1H   | Number of Transients | 4       |
| Original Points Count  | 16384                                         | Points Count     | 65536                | Pulse Sequence | zg30 | Solvent              | DMSO-D6 |
| Temperature (degree C) | 27.000                                        | Sweep Width (Hz) | 6410.26              |                |      |                      |         |

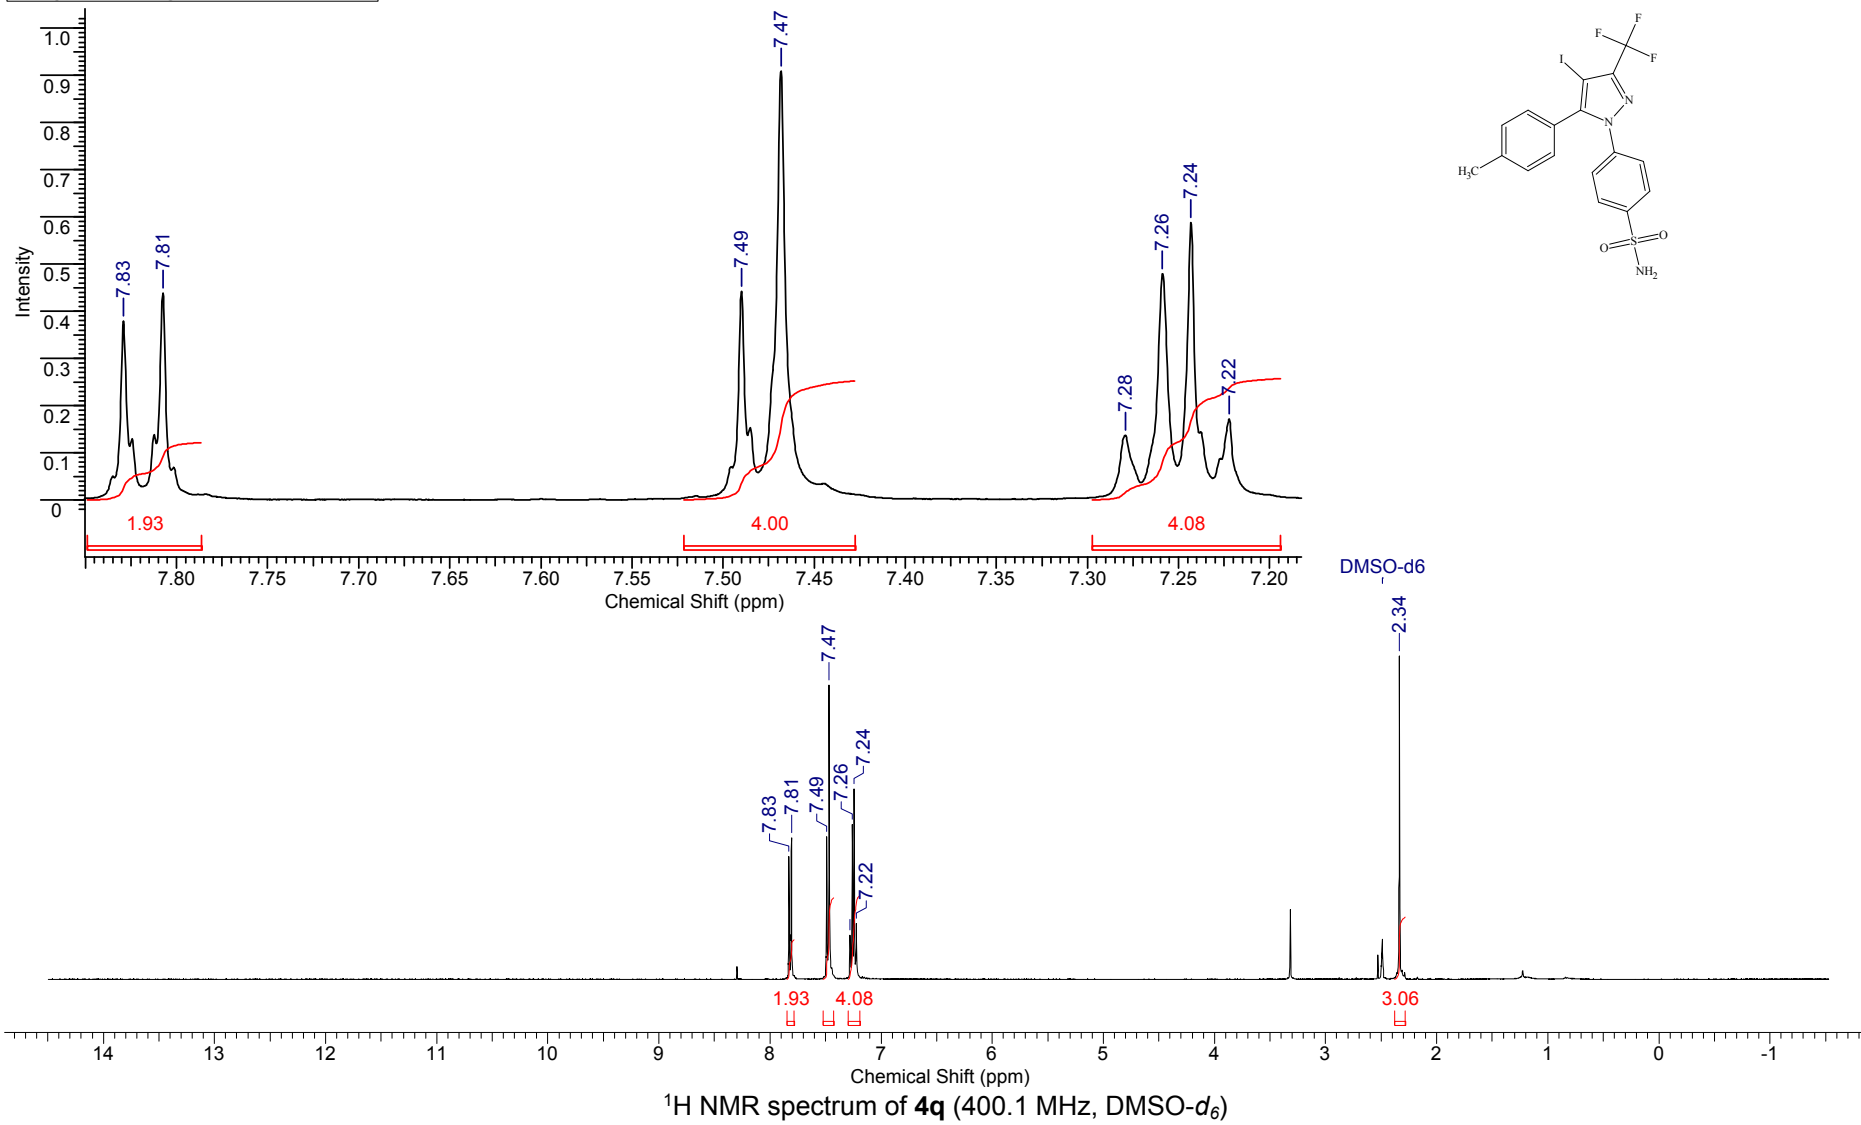

|           |          |                |                                                                                 |
|-----------|----------|----------------|---------------------------------------------------------------------------------|
| <b>FW</b> | 507.2698 | <b>Formula</b> | C <sub>17</sub> H <sub>13</sub> F <sub>3</sub> IN <sub>3</sub> O <sub>2</sub> S |
|-----------|----------|----------------|---------------------------------------------------------------------------------|

|                               |                                              |                              |                      |                               |             |                      |
|-------------------------------|----------------------------------------------|------------------------------|----------------------|-------------------------------|-------------|----------------------|
| <b>Acquisition Time (sec)</b> | 0.4999                                       | <b>Comment</b>               | Imported from UXMNR. |                               | <b>Date</b> | 07 Jun 2014 20:33:42 |
| <b>File Name</b>              | C:\BM_DATA\DOCS\SPEC_BM_H_C\BM-499.C_002001r | <b>Frequency (MHz)</b>       | 100.61               | <b>Nucleus</b>                | 13C         |                      |
| <b>Number of Transients</b>   | 120                                          | <b>Original Points Count</b> | 12076                | <b>Points Count</b>           | 65536       |                      |
| <b>Solvent</b>                | DEUTERIUM OXIDE                              | <b>Sweep Width (Hz)</b>      | 24154.59             | <b>Pulse Sequence</b>         | zgpg30      |                      |
|                               |                                              |                              |                      | <b>Temperature (degree C)</b> | 27.000      |                      |

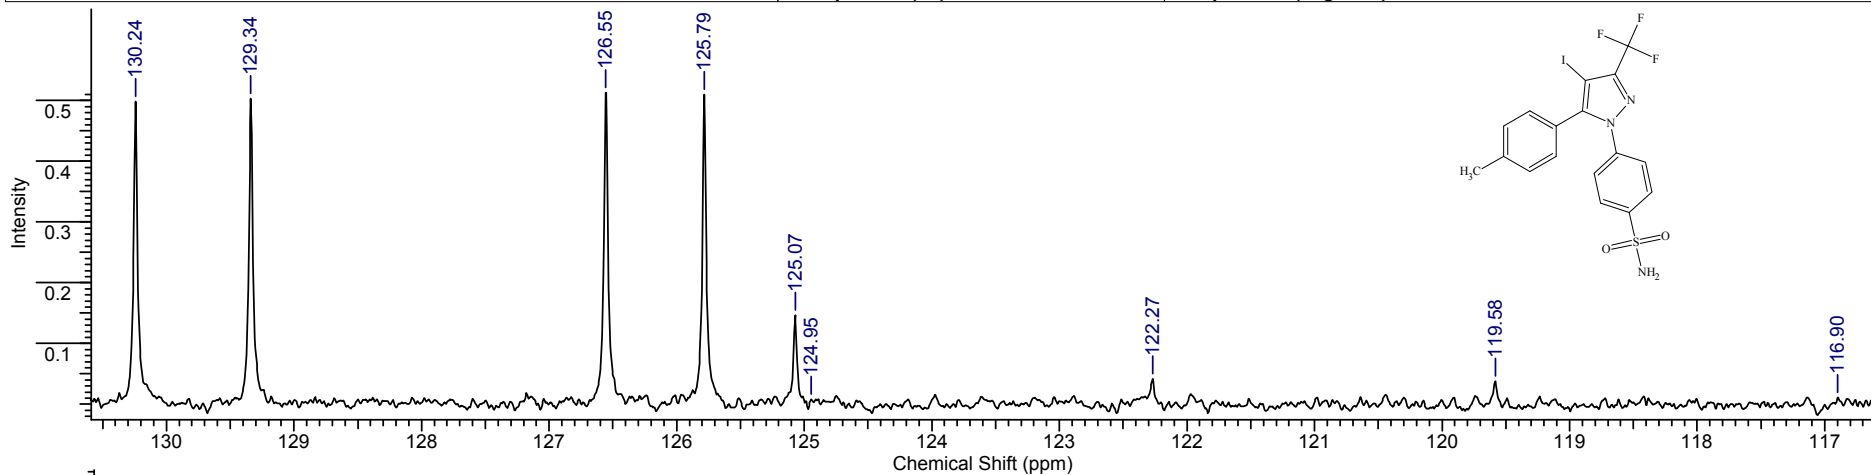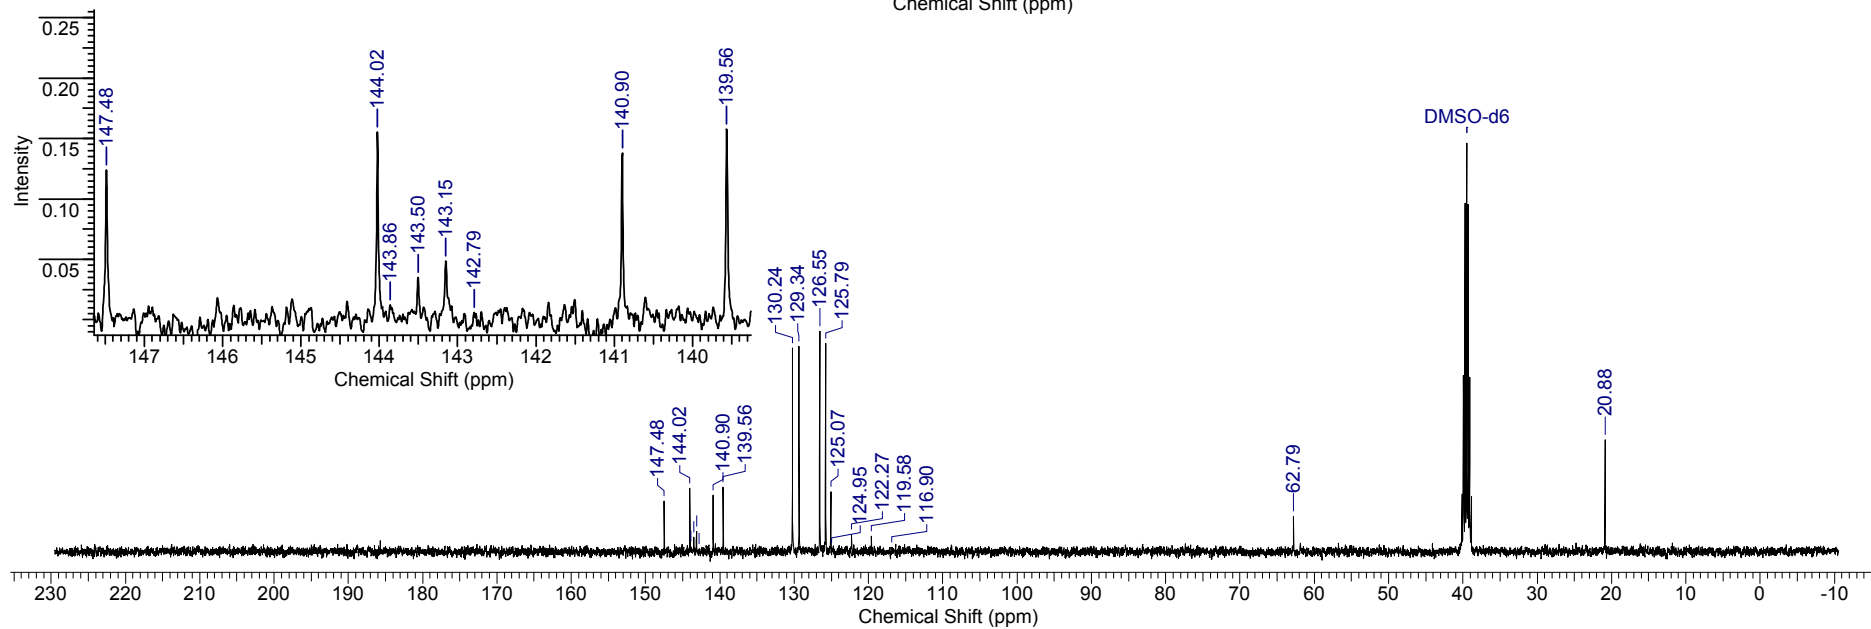

<sup>13</sup>C NMR spectrum of **4q** (100.6 MHz, DMSO-*d*<sub>6</sub>)

|           |          |                |                                                                                 |
|-----------|----------|----------------|---------------------------------------------------------------------------------|
| <b>FW</b> | 507.2698 | <b>Formula</b> | C <sub>17</sub> H <sub>13</sub> F <sub>3</sub> IN <sub>3</sub> O <sub>2</sub> S |
|-----------|----------|----------------|---------------------------------------------------------------------------------|

|                               |          |                               |                 |                             |                                                         |                              |       |
|-------------------------------|----------|-------------------------------|-----------------|-----------------------------|---------------------------------------------------------|------------------------------|-------|
| <b>Acquisition Time (sec)</b> | 1.0000   | <b>Date</b>                   | Jun 20 2014     | <b>File Name</b>            | C:\BM_DATA\DOCS\SPEC_BM_FBM-508_20140620_01\FLUORINE_01 |                              |       |
| <b>Frequency (MHz)</b>        | 376.31   | <b>Nucleus</b>                | <sup>19</sup> F | <b>Number of Transients</b> | 16                                                      | <b>Original Points Count</b> | 89286 |
| <b>Points Count</b>           | 131072   | <b>Pulse Sequence</b>         | s2pul           | <b>Solvent</b>              | CHLOROFORM-D                                            |                              |       |
| <b>Sweep Width (Hz)</b>       | 89285.71 | <b>Temperature (degree C)</b> | 50.000          |                             |                                                         |                              |       |

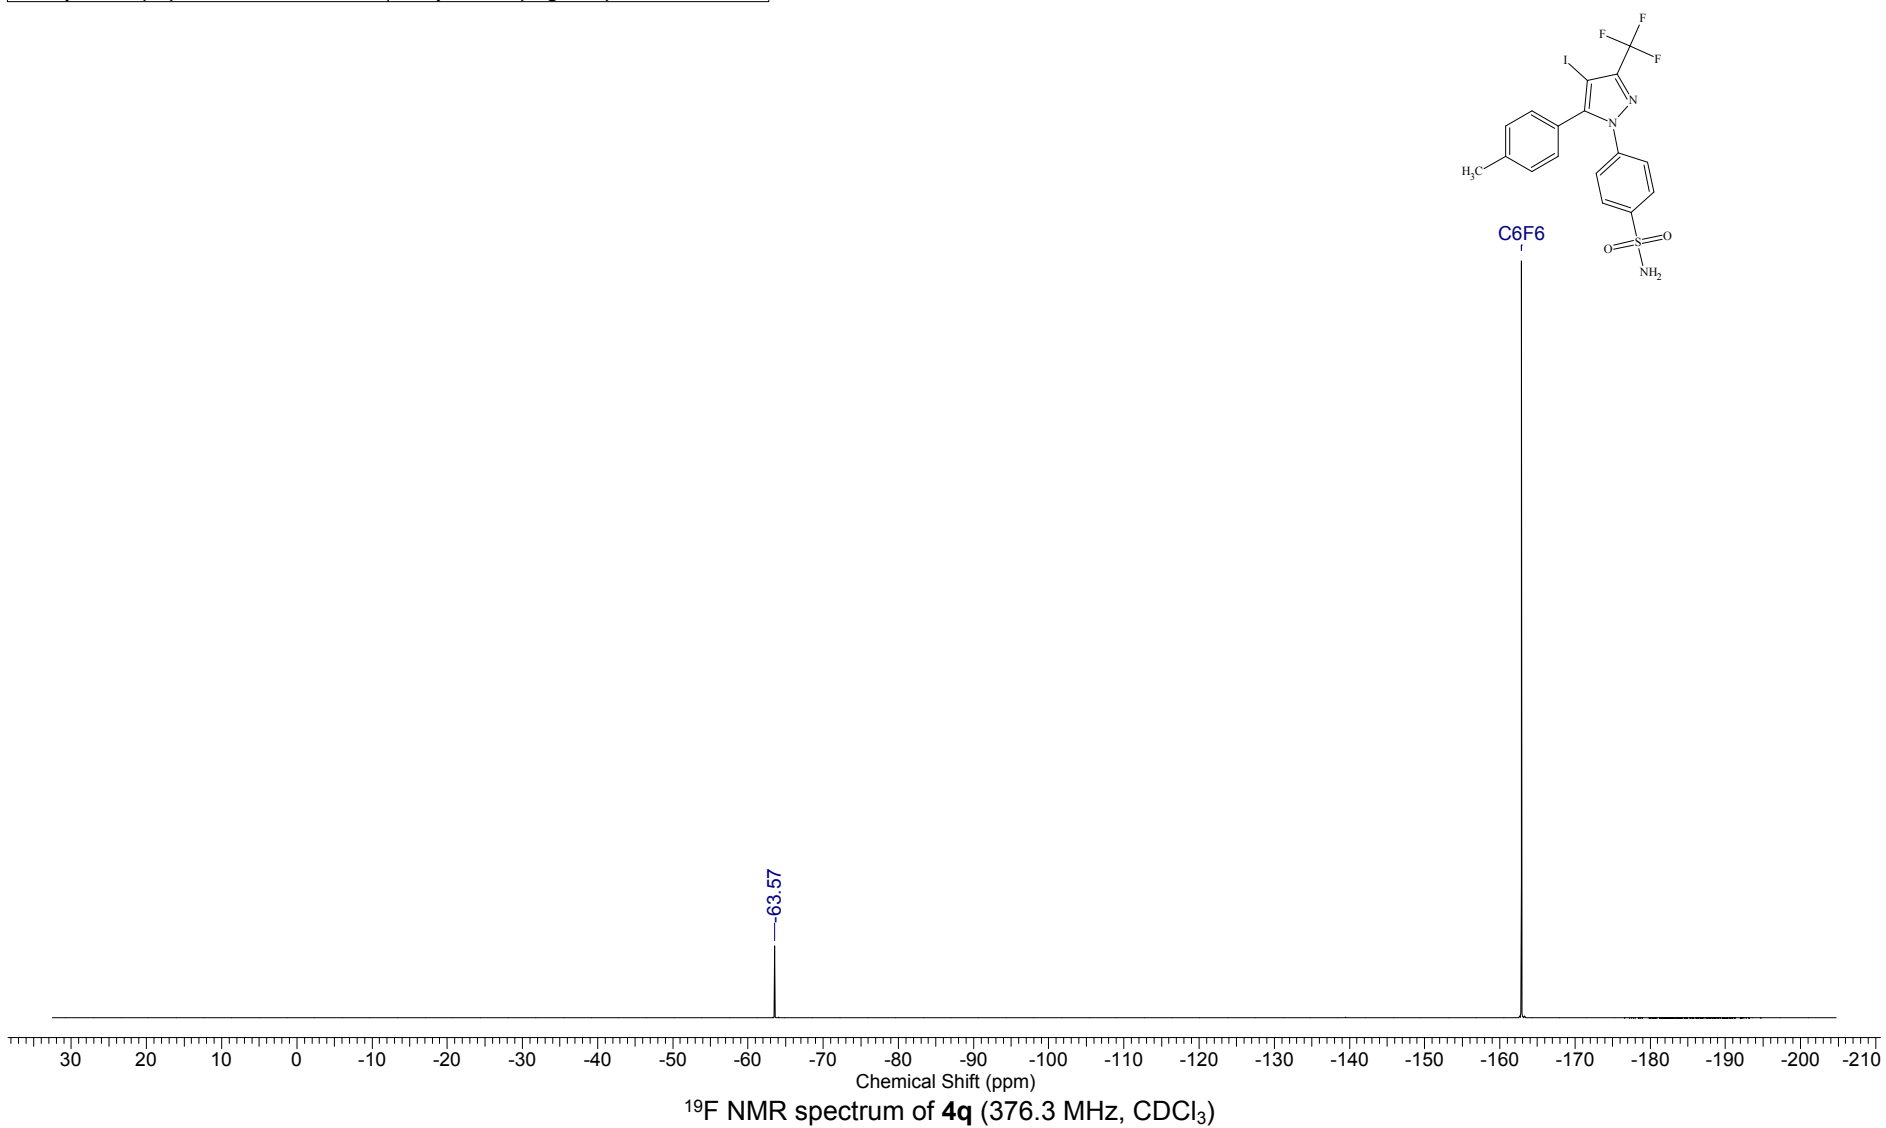

|           |          |                |                                                                                 |
|-----------|----------|----------------|---------------------------------------------------------------------------------|
| <b>FW</b> | 507.2698 | <b>Formula</b> | C <sub>17</sub> H <sub>13</sub> F <sub>3</sub> IN <sub>3</sub> O <sub>2</sub> S |
|-----------|----------|----------------|---------------------------------------------------------------------------------|

|                               |        |                |                 |                             |                                                         |                               |        |                     |        |
|-------------------------------|--------|----------------|-----------------|-----------------------------|---------------------------------------------------------|-------------------------------|--------|---------------------|--------|
| <b>Acquisition Time (sec)</b> | 2.0000 | <b>Date</b>    | Jun 17 2014     | <b>File Name</b>            | C:\BM_DATA\DOCS\SPEC_BM_FBM-499_20140617_01\FLUORINE_01 |                               |        |                     |        |
| <b>Frequency (MHz)</b>        | 376.31 | <b>Nucleus</b> | <sup>19</sup> F | <b>Number of Transients</b> | 16                                                      | <b>Original Points Count</b>  | 178571 | <b>Points Count</b> | 262144 |
| <b>Pulse Sequence</b>         | s2pul  | <b>Solvent</b> | DMSO-D6         | <b>Sweep Width (Hz)</b>     | 89285.71                                                | <b>Temperature (degree C)</b> | 50.000 |                     |        |

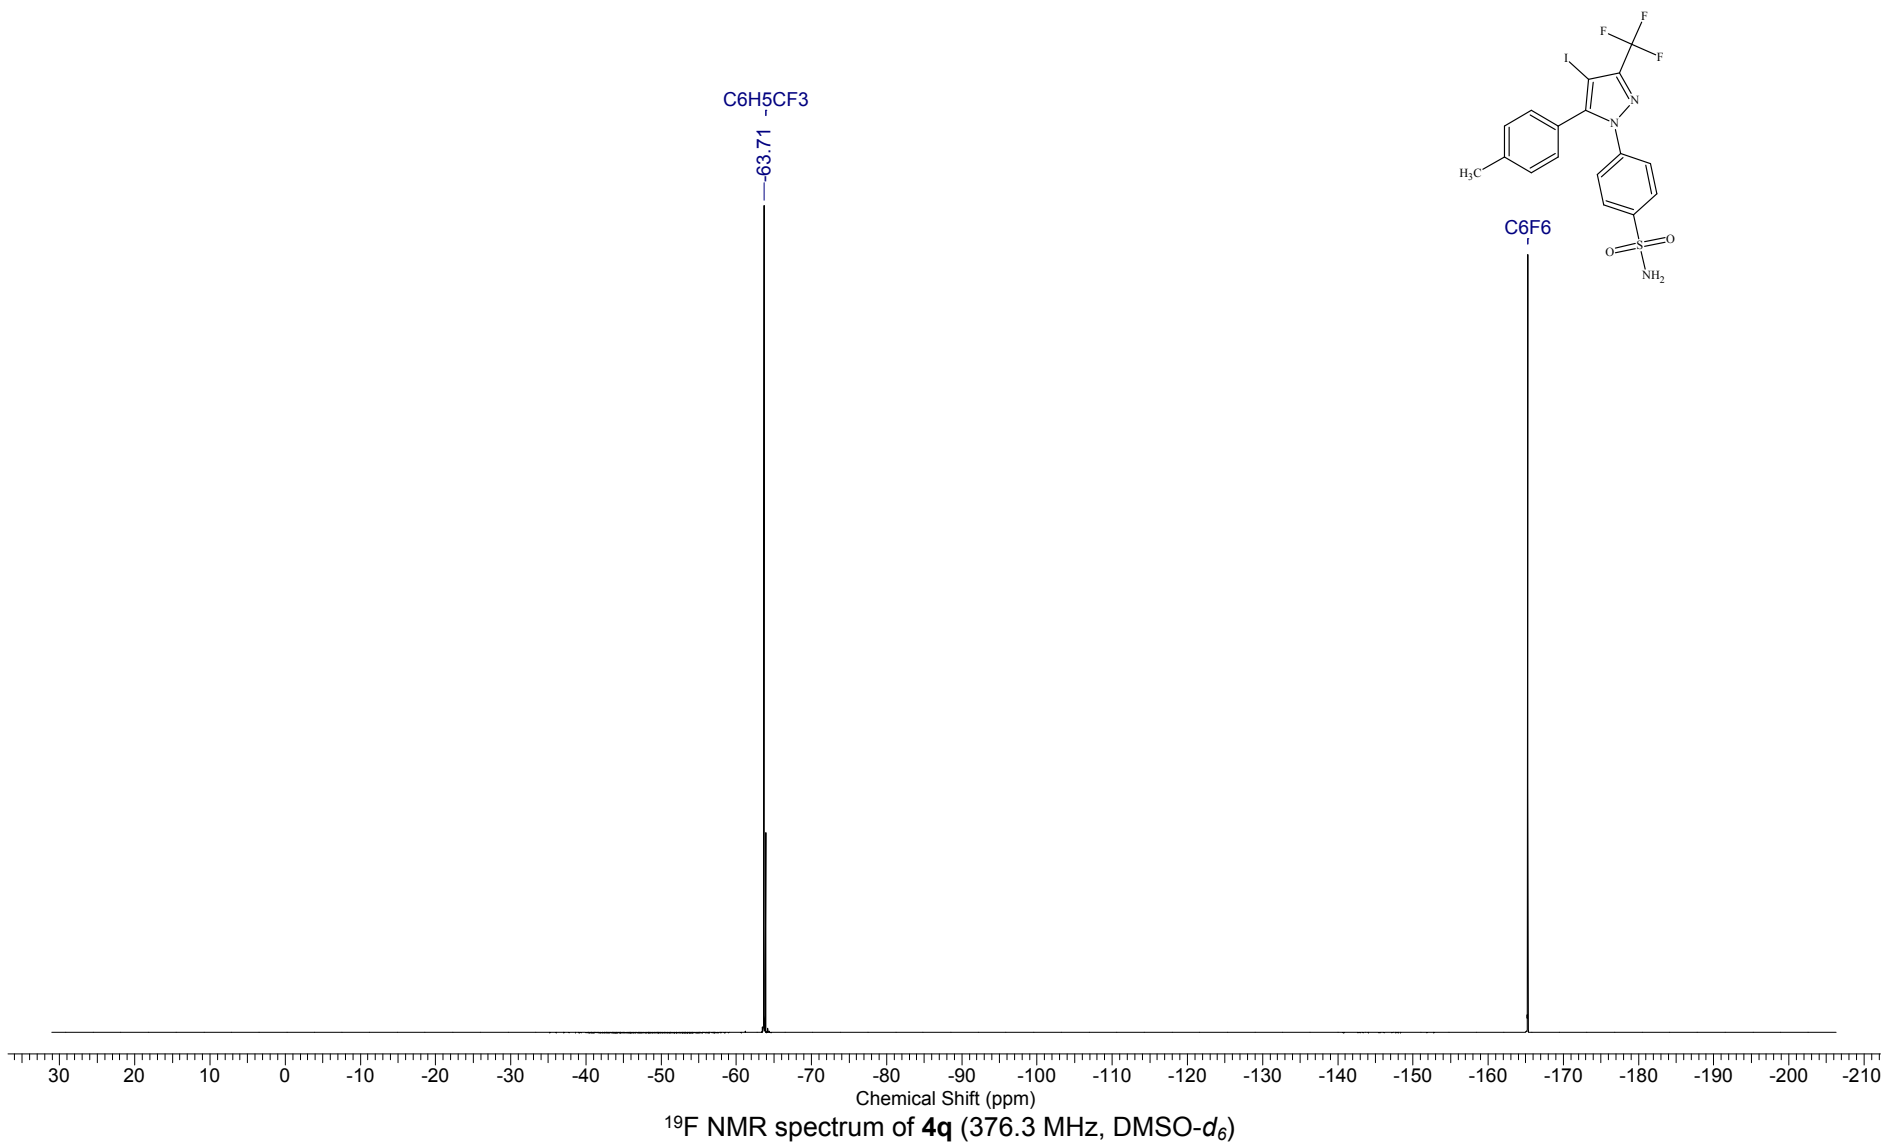

**FW** 478.6345      **Formula** C<sub>17</sub>H<sub>11</sub>ClF<sub>3</sub>IN<sub>2</sub>O

|                               |                                                            |                             |                      |                              |                      |
|-------------------------------|------------------------------------------------------------|-----------------------------|----------------------|------------------------------|----------------------|
| <b>Acquisition Time (sec)</b> | 2.5559                                                     | <b>Comment</b>              | Imported from UXMNR. | <b>Date</b>                  | 27 Jul 2017 18:16:12 |
| <b>File Name</b>              | C:\IBM_DATA\DOCS\SPEC_BM_H_C_V-VIII.2017\BM-1142.H_001001r |                             |                      | <b>Frequency (MHz)</b>       | 400.13               |
| <b>Nucleus</b>                | 1H                                                         | <b>Number of Transients</b> | 4                    | <b>Original Points Count</b> | 16384                |
| <b>Pulse Sequence</b>         | zg30                                                       | <b>Solvent</b>              | CHLOROFORM-D         | <b>Points Count</b>          | 65536                |
| <b>Temperature (degree C)</b> | 27.000                                                     |                             |                      | <b>Sweep Width (Hz)</b>      | 6410.26              |

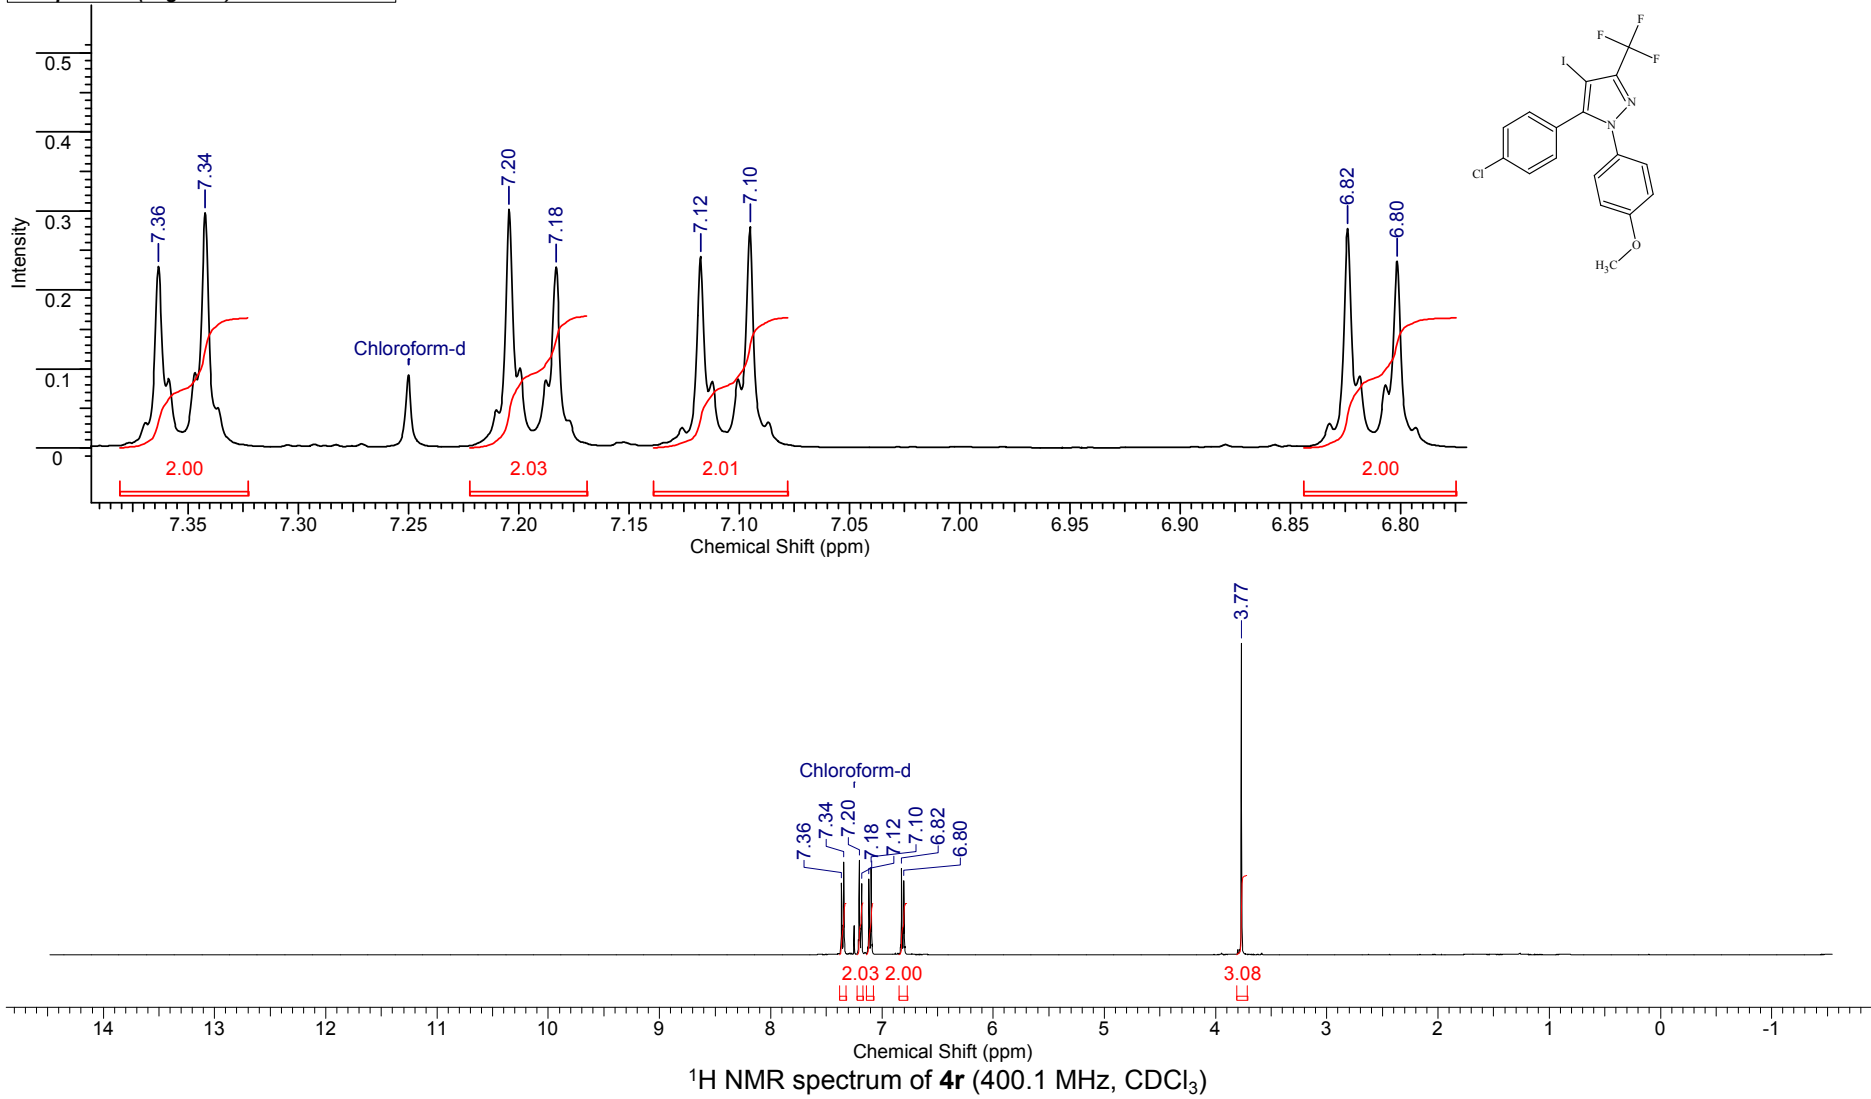

**FW** 478.6345 **Formula** C<sub>17</sub>H<sub>11</sub>ClF<sub>3</sub>IN<sub>2</sub>O

|                               |                                                           |                             |                      |                              |                         |                      |       |
|-------------------------------|-----------------------------------------------------------|-----------------------------|----------------------|------------------------------|-------------------------|----------------------|-------|
| <b>Acquisition Time (sec)</b> | 0.4999                                                    | <b>Comment</b>              | Imported from UXMNR. |                              | <b>Date</b>             | 27 Jul 2017 18:18:52 |       |
| <b>File Name</b>              | C:\BM_DATA\DOCS\SPEC_BM_H,C_V-VIII.2017\BM-1142.C_002001r |                             |                      | <b>Frequency (MHz)</b>       | 100.61                  |                      |       |
| <b>Nucleus</b>                | 13C                                                       | <b>Number of Transients</b> | 64                   | <b>Original Points Count</b> | 12076                   | <b>Points Count</b>  | 65536 |
| <b>Pulse Sequence</b>         | zgpg30                                                    | <b>Solvent</b>              | CHLOROFORM-D         |                              | <b>Sweep Width (Hz)</b> | 24154.59             |       |
| <b>Temperature (degree C)</b> | 27.000                                                    |                             |                      |                              |                         |                      |       |

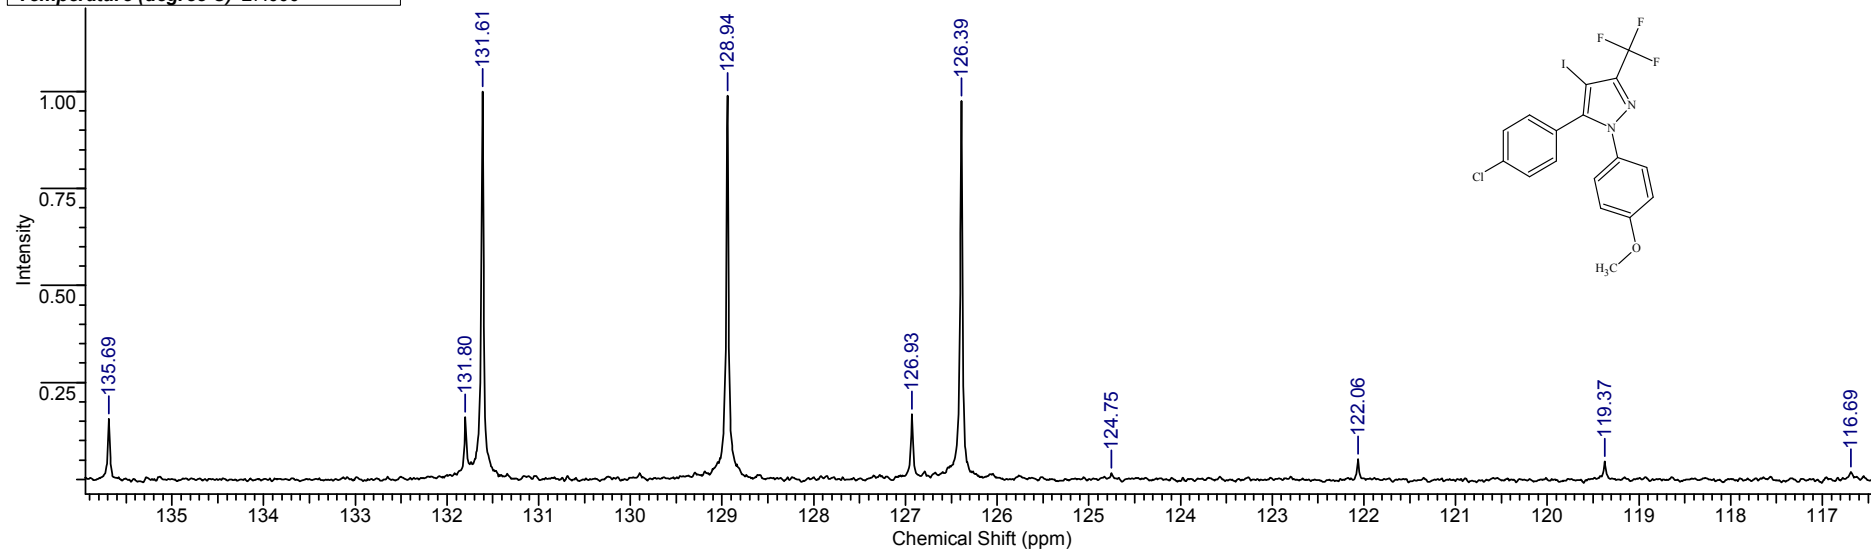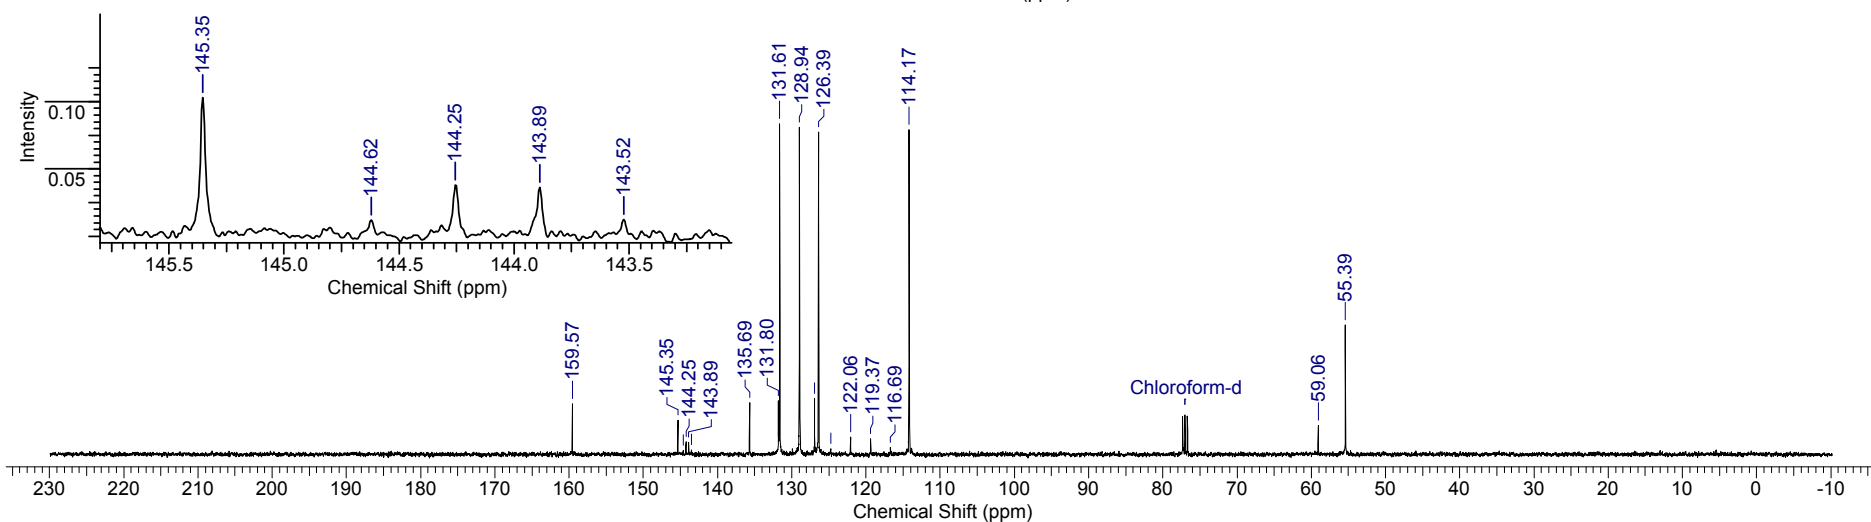

<sup>13</sup>C NMR spectrum of **4r** (100.6 MHz, CDCl<sub>3</sub>)



|                               |                                                                                        |                             |                                                                    |                              |           |                               |        |
|-------------------------------|----------------------------------------------------------------------------------------|-----------------------------|--------------------------------------------------------------------|------------------------------|-----------|-------------------------------|--------|
| <b>FW</b>                     | 478.6345                                                                               | <b>Formula</b>              | C <sub>17</sub> H <sub>11</sub> ClF <sub>3</sub> IN <sub>2</sub> O |                              |           |                               |        |
| <b>Acquisition Time (sec)</b> | 0.2449                                                                                 | <b>Date</b>                 | 31 Jul 2017 15:34:24                                               |                              |           |                               |        |
| <b>File Name</b>              | C:\BM_DATA\DOCS\SPEC_F_IX-XII.2016\BM-1142.{19F}\BM-1142.{19F}\BM-1142.{19F}_019000fid |                             |                                                                    | <b>Frequency (MHz)</b>       | 282.39    |                               |        |
| <b>Nucleus</b>                | 19F                                                                                    | <b>Number of Transients</b> | 1                                                                  | <b>Original Points Count</b> | 34018     | <b>Points Count</b>           | 65536  |
| <b>Pulse Sequence</b>         | zg                                                                                     | <b>Solvent</b>              | CHLOROFORM-D                                                       | <b>Sweep Width (Hz)</b>      | 138888.89 | <b>Temperature (degree C)</b> | 27.000 |

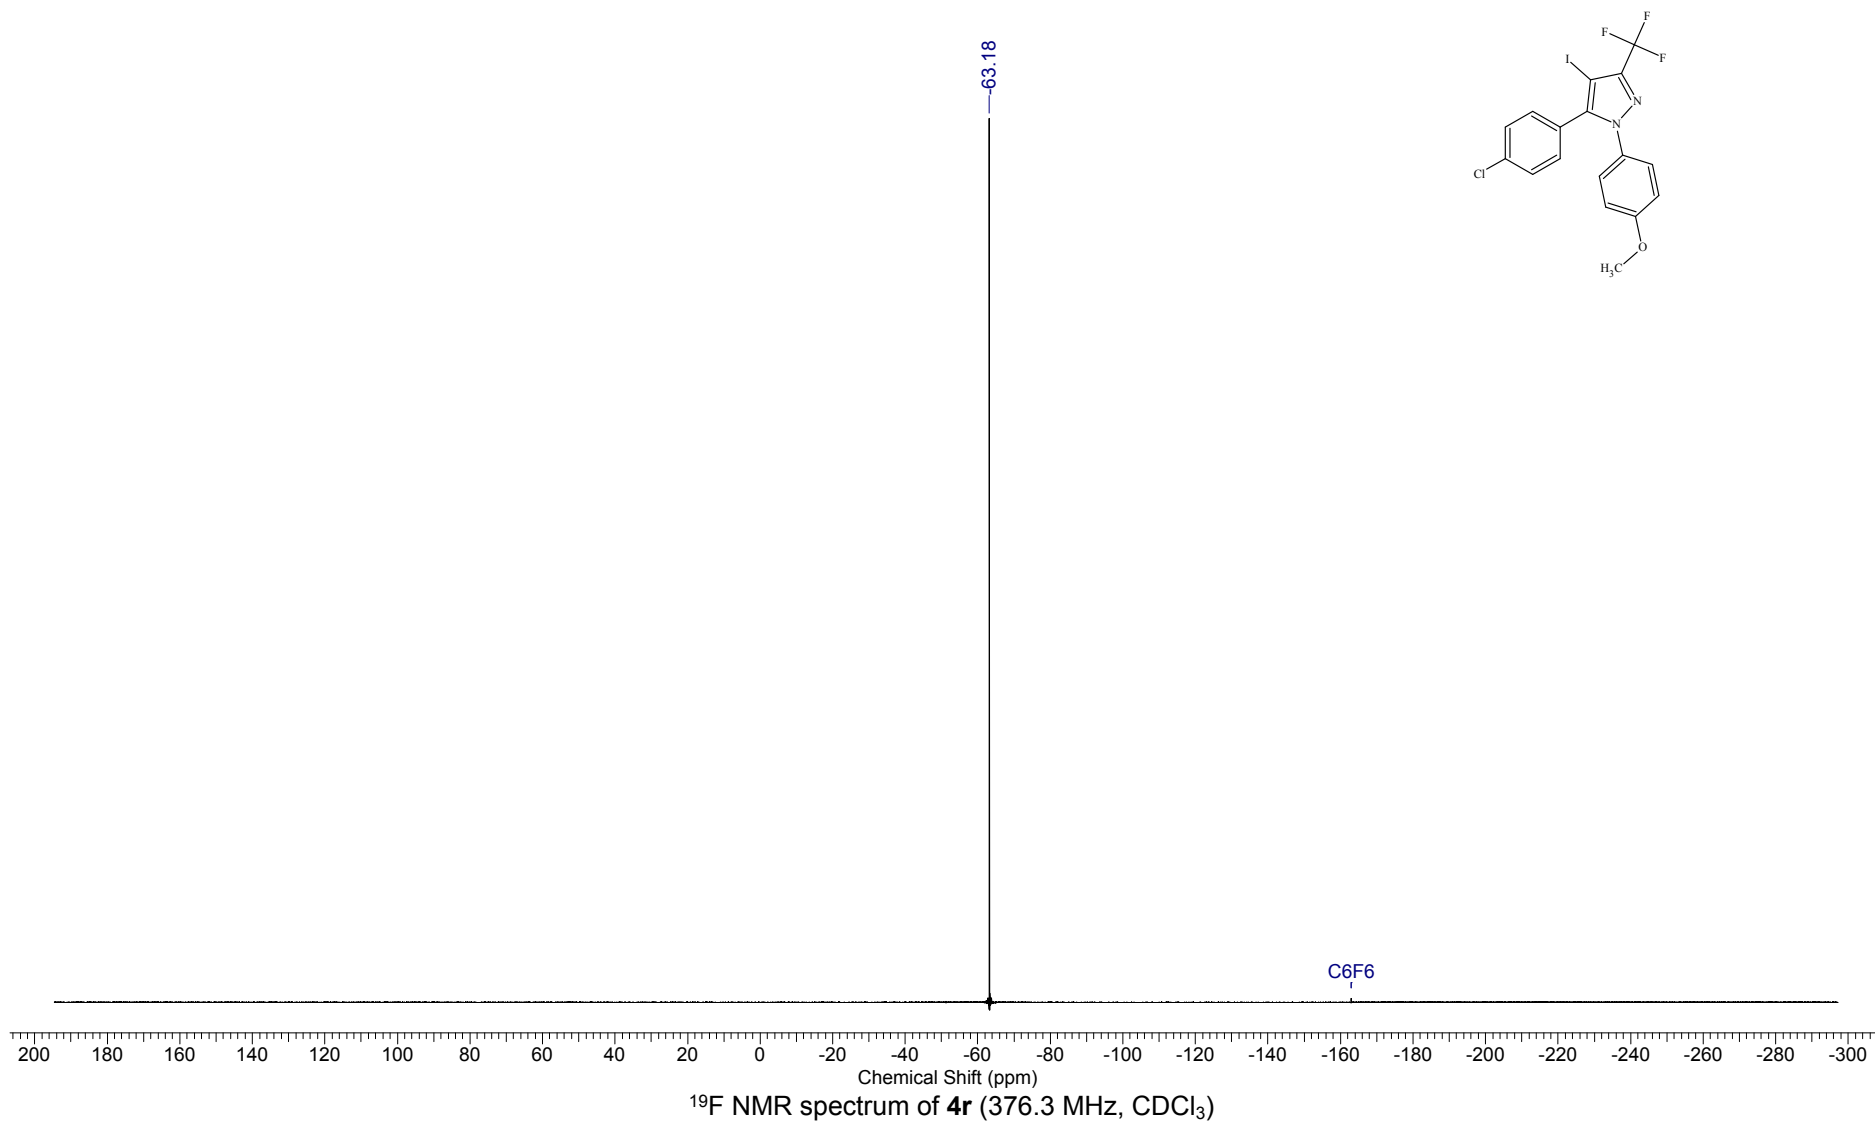

|           |          |                |                                                                 |
|-----------|----------|----------------|-----------------------------------------------------------------|
| <b>FW</b> | 322.7120 | <b>Formula</b> | C <sub>16</sub> H <sub>10</sub> ClF <sub>3</sub> N <sub>2</sub> |
|-----------|----------|----------------|-----------------------------------------------------------------|

|                               |                                            |                               |                        |                       |                |                      |                             |   |
|-------------------------------|--------------------------------------------|-------------------------------|------------------------|-----------------------|----------------|----------------------|-----------------------------|---|
| <b>Acquisition Time (sec)</b> | 2.5559                                     | <b>Comment</b>                | Imported from UXMNR.   |                       | <b>Date</b>    | 24 May 2017 17:32:56 |                             |   |
| <b>File Name</b>              | D:\BN\output\2017\05.i à\BM-1071.H_001001r |                               | <b>Frequency (MHz)</b> | 400.13                | <b>Nucleus</b> | 1H                   | <b>Number of Transients</b> | 6 |
| <b>Original Points Count</b>  | 16384                                      | <b>Points Count</b>           | 65536                  | <b>Pulse Sequence</b> | zg30           | <b>Solvent</b>       | CHLOROFORM-D                |   |
| <b>Sweep Width (Hz)</b>       | 6410.26                                    | <b>Temperature (degree C)</b> | 27.000                 |                       |                |                      |                             |   |

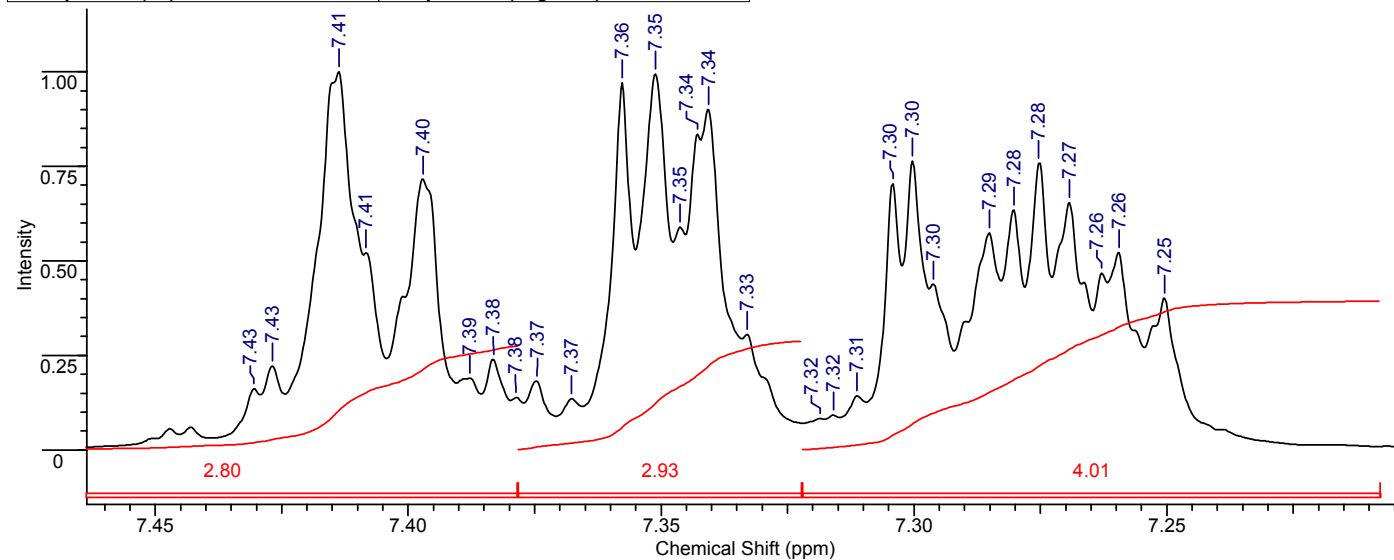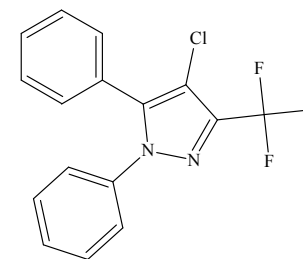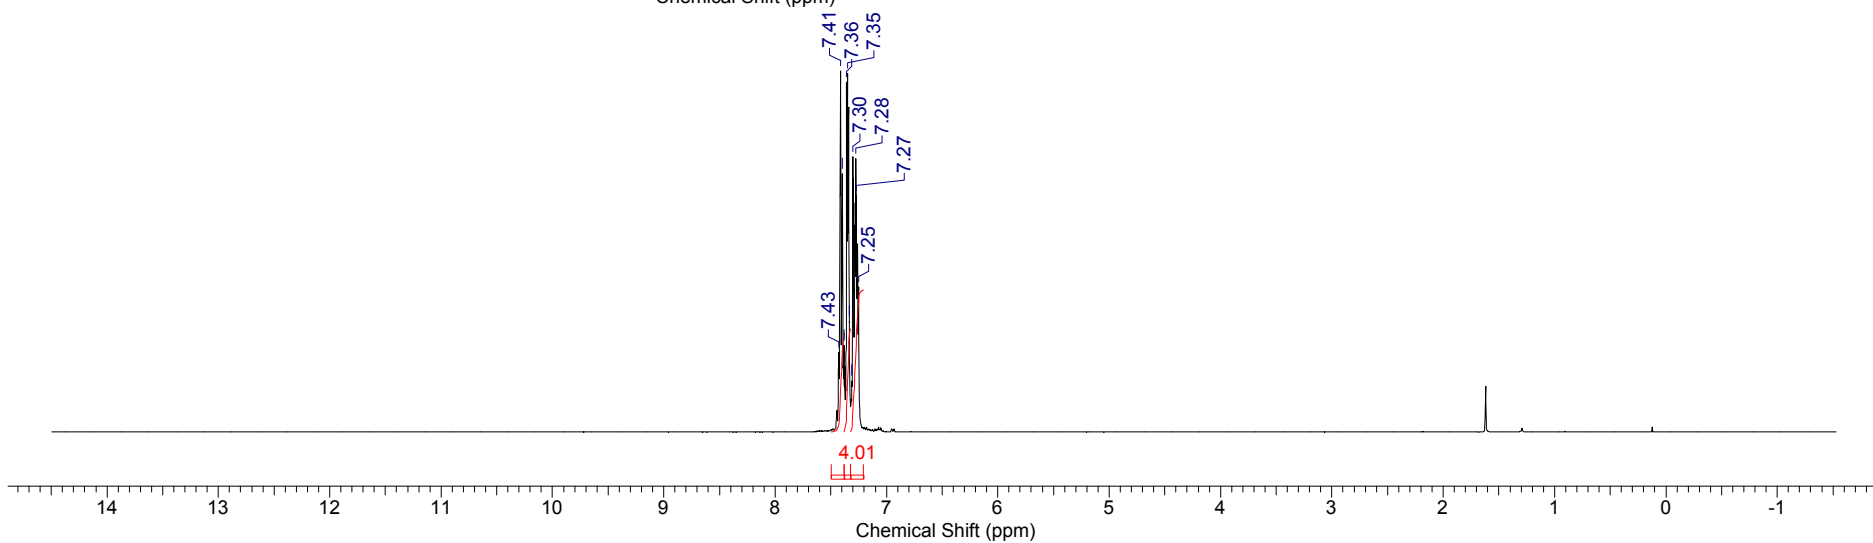

<sup>1</sup>H NMR spectrum of **5a** (400.1 MHz, CDCl<sub>3</sub>)

**FW** 322.7120 **Formula** C<sub>16</sub>H<sub>10</sub>ClF<sub>3</sub>N<sub>2</sub>

|                               |                                             |                              |                      |                               |                              |                      |
|-------------------------------|---------------------------------------------|------------------------------|----------------------|-------------------------------|------------------------------|----------------------|
| <b>Acquisition Time (sec)</b> | 0.4999                                      | <b>Comment</b>               | Imported from UXMNR. |                               | <b>Date</b>                  | 24 May 2017 17:38:00 |
| <b>File Name</b>              | D:\BN\output\2017\05.i àé\BM-1071.C_002001r | <b>Frequency (MHz)</b>       | 100.61               | <b>Nucleus</b>                | 13C                          |                      |
| <b>Number of Transients</b>   | 155                                         | <b>Original Points Count</b> | 12076                | <b>Points Count</b>           | <b>Pulse Sequence</b> zgpg30 |                      |
| <b>Solvent</b>                | CHLOROFORM-D                                | <b>Sweep Width (Hz)</b>      | 24154.59             | <b>Temperature (degree C)</b> | 27.000                       |                      |

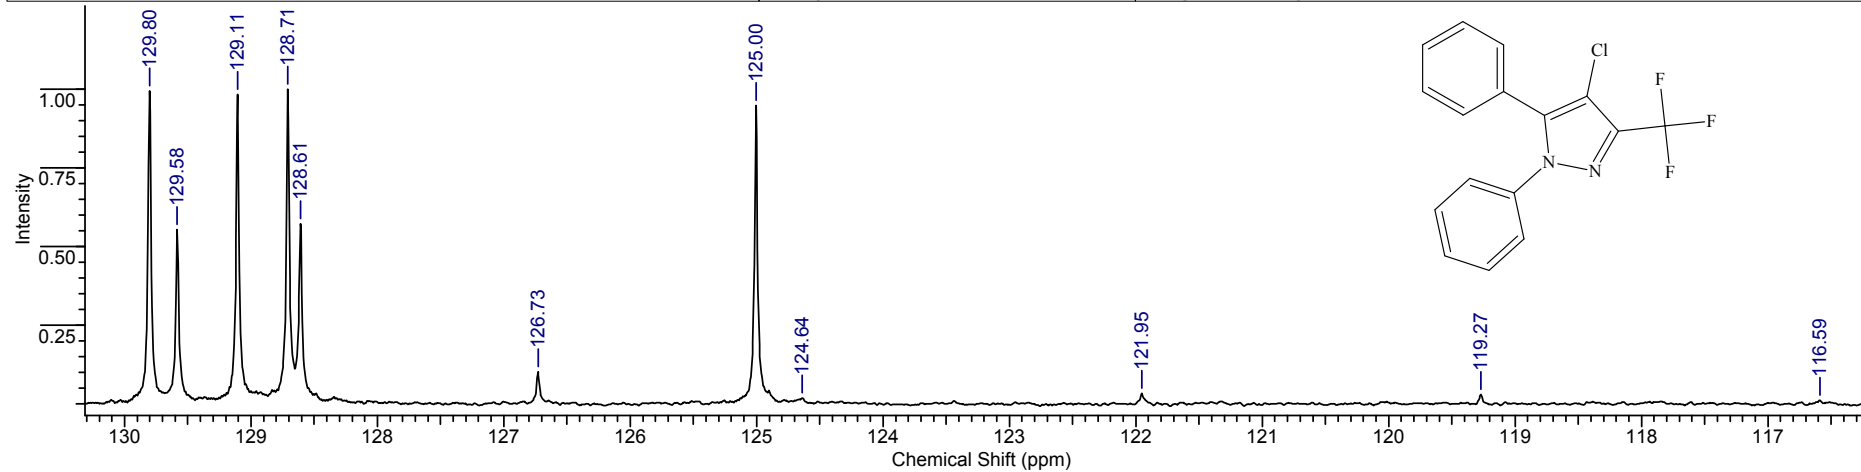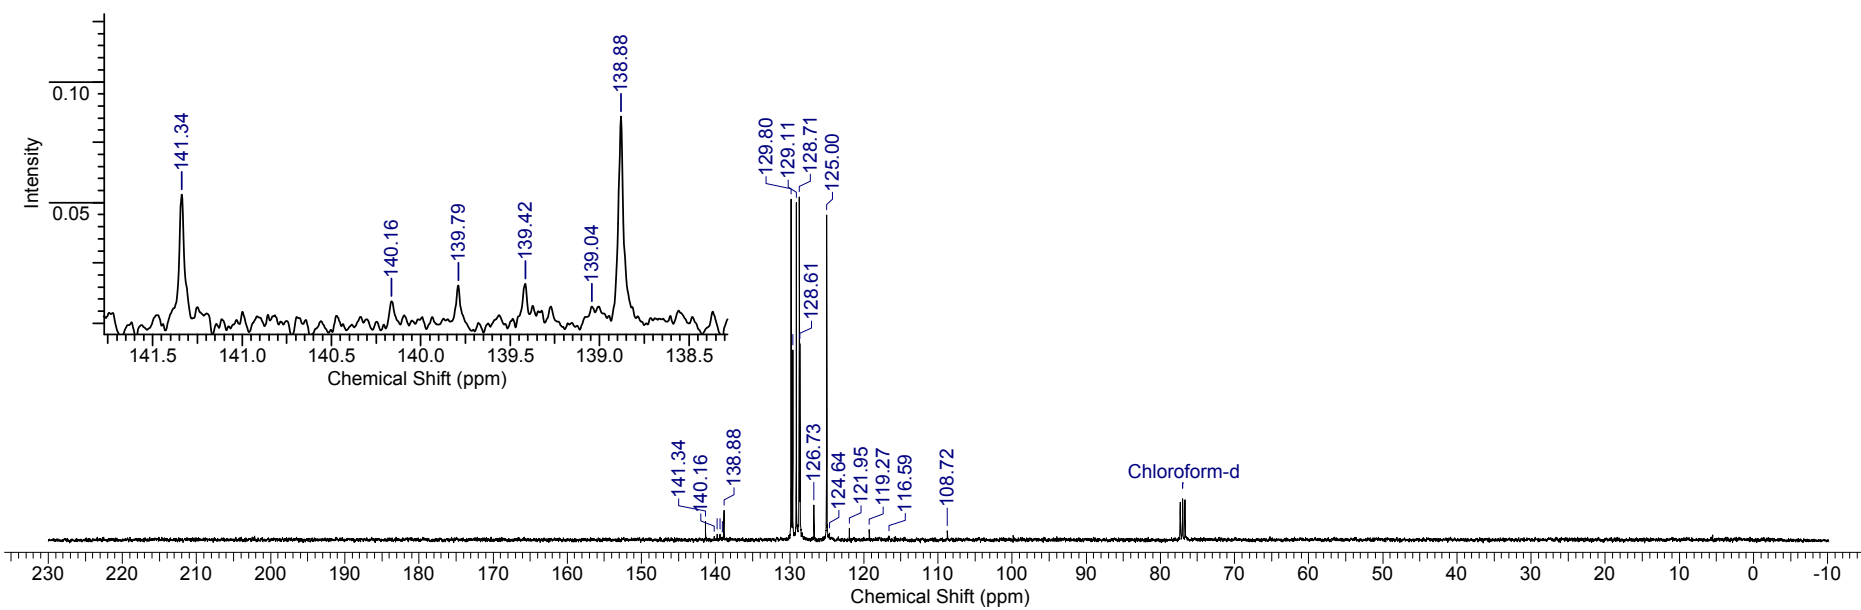

<sup>13</sup>C NMR spectrum of **5a** (100.6 MHz, CDCl<sub>3</sub>)

|           |          |                |                                                                 |
|-----------|----------|----------------|-----------------------------------------------------------------|
| <b>FW</b> | 322.7120 | <b>Formula</b> | C <sub>16</sub> H <sub>10</sub> ClF <sub>3</sub> N <sub>2</sub> |
|-----------|----------|----------------|-----------------------------------------------------------------|

|                               |          |                               |             |                             |                                                                     |                              |       |
|-------------------------------|----------|-------------------------------|-------------|-----------------------------|---------------------------------------------------------------------|------------------------------|-------|
| <b>Acquisition Time (sec)</b> | 0.7340   | <b>Date</b>                   | May 30 2017 | <b>File Name</b>            | D:\BN\output\F19\F_2017\2017.05.30\bm1071-f_20170530_01\FLUORINE_01 |                              |       |
| <b>Frequency (MHz)</b>        | 376.31   | <b>Nucleus</b>                | 19F         | <b>Number of Transients</b> | 1000                                                                | <b>Original Points Count</b> | 65536 |
| <b>Points Count</b>           | 65536    | <b>Pulse Sequence</b>         | s2pul       | <b>Solvent</b>              | CHLOROFORM-D                                                        |                              |       |
| <b>Sweep Width (Hz)</b>       | 89285.71 | <b>Temperature (degree C)</b> | 25.000      |                             |                                                                     |                              |       |

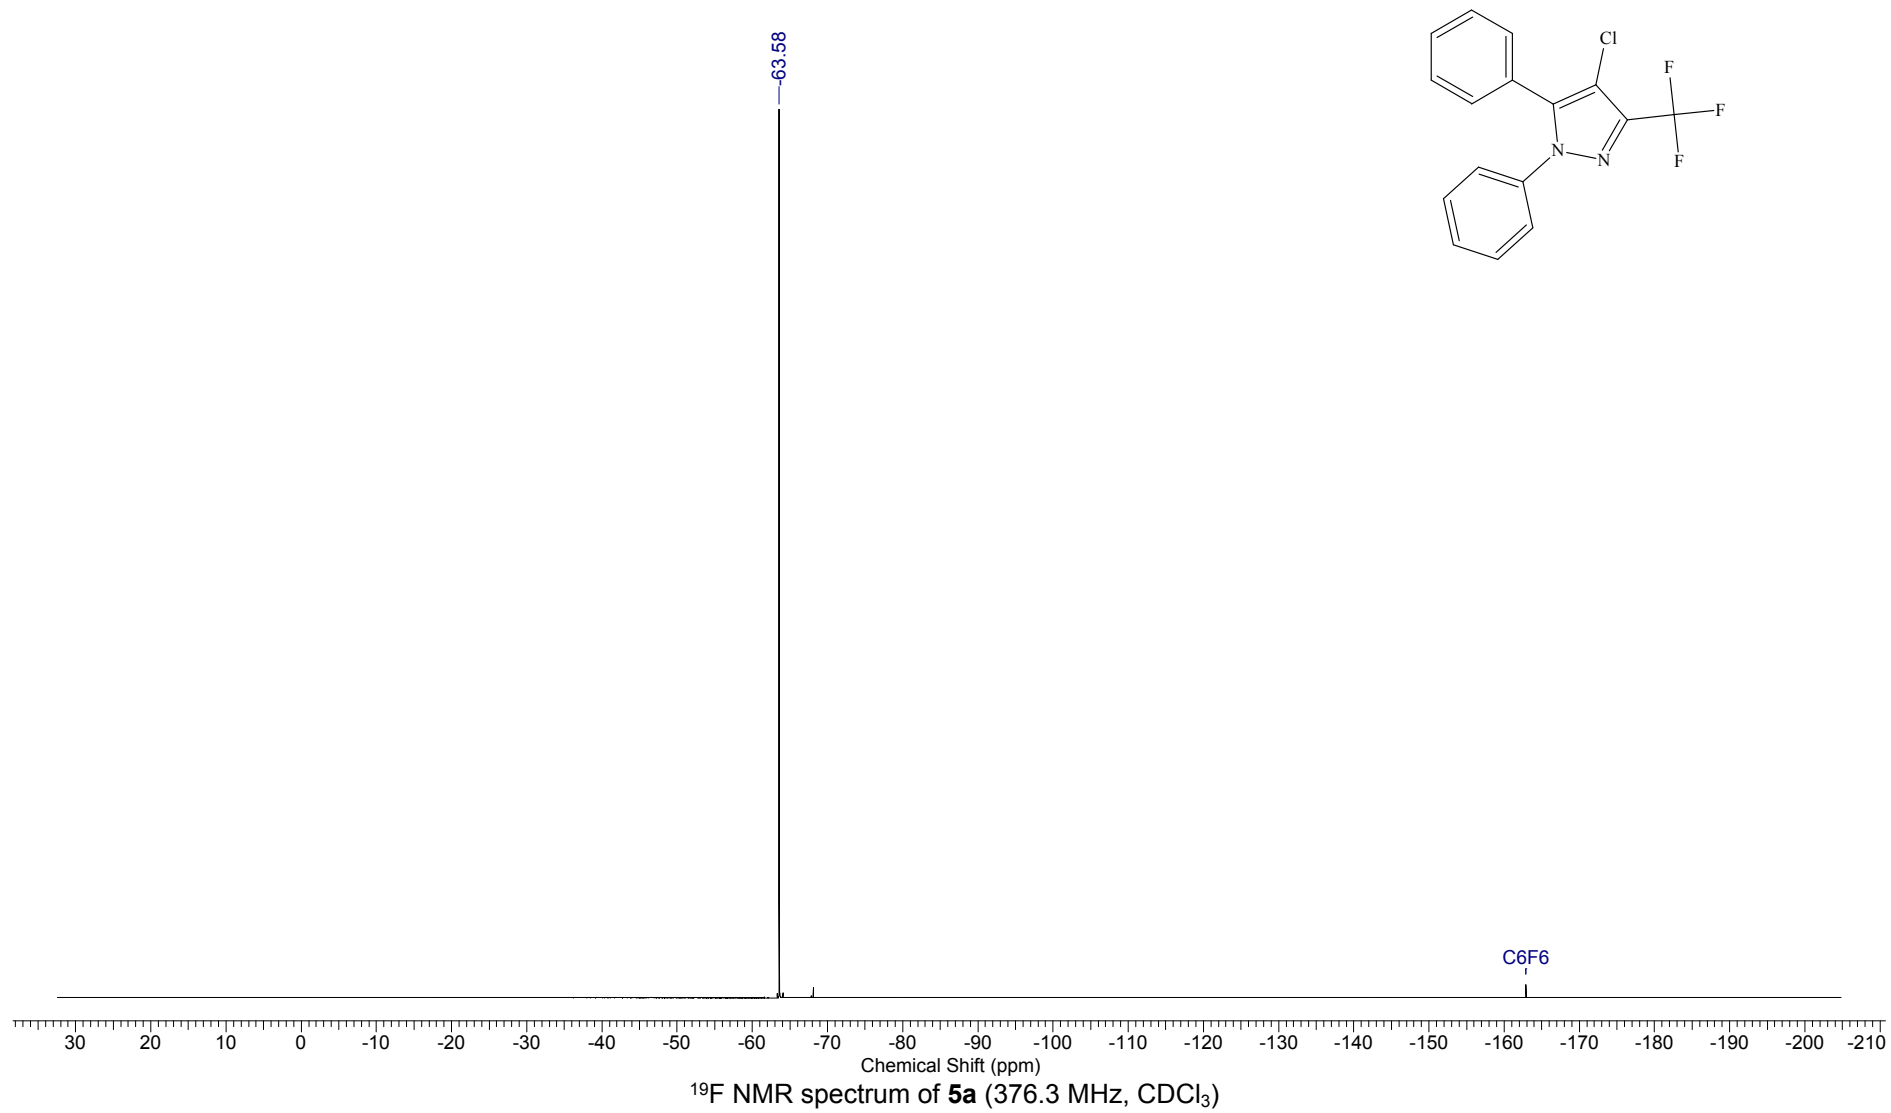

FW 387.1827      Formula C<sub>17</sub>H<sub>11</sub>Cl<sub>2</sub>F<sub>3</sub>N<sub>2</sub>O

|                        |                                                           |                      |                      |                       |                      |
|------------------------|-----------------------------------------------------------|----------------------|----------------------|-----------------------|----------------------|
| Acquisition Time (sec) | 2.5559                                                    | Comment              | Imported from UXMNR. | Date                  | 28 Jul 2017 15:37:48 |
| File Name              | C:\BM_DATA\DOCS\SPEC_BM_H,C_V-VIII.2017\BM-1145.H_001001r |                      |                      | Frequency (MHz)       | 400.13               |
| Nucleus                | 1H                                                        | Number of Transients | 5                    | Original Points Count | 16384                |
| Pulse Sequence         | zg30                                                      | Solvent              | CHLOROFORM-D         | Points Count          | 65536                |
| Temperature (degree C) | 27.000                                                    |                      |                      | Sweep Width (Hz)      | 6410.26              |

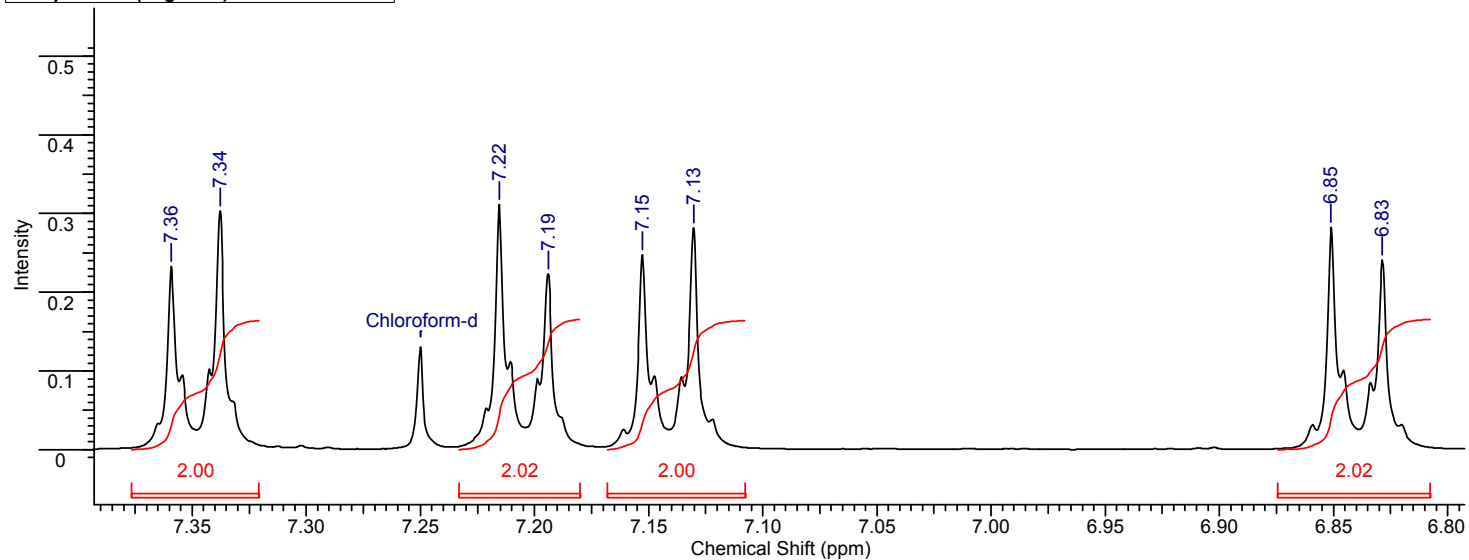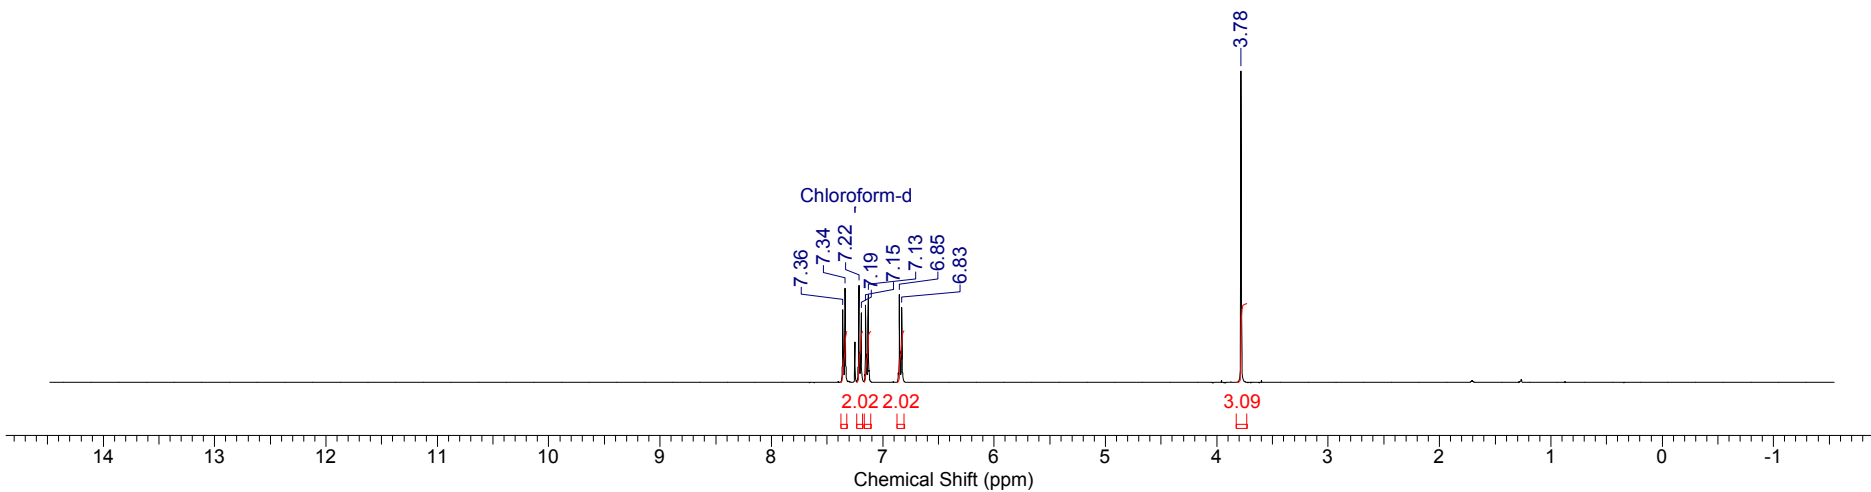

<sup>1</sup>H NMR spectrum of **5b** (400.1 MHz, CDCl<sub>3</sub>)

|           |          |                |                                                                                 |
|-----------|----------|----------------|---------------------------------------------------------------------------------|
| <b>FW</b> | 387.1827 | <b>Formula</b> | C <sub>17</sub> H <sub>11</sub> Cl <sub>2</sub> F <sub>3</sub> N <sub>2</sub> O |
|-----------|----------|----------------|---------------------------------------------------------------------------------|

|                               |                                                           |                             |                      |                              |                      |
|-------------------------------|-----------------------------------------------------------|-----------------------------|----------------------|------------------------------|----------------------|
| <b>Acquisition Time (sec)</b> | 0.4999                                                    | <b>Comment</b>              | Imported from UXNMR. | <b>Date</b>                  | 28 Jul 2017 15:39:18 |
| <b>File Name</b>              | C:\BM_DATA\DOCS\SPEC_BM_H,C_V-VIII.2017\BM-1145.C_002001r |                             |                      | <b>Frequency (MHz)</b>       | 100.61               |
| <b>Nucleus</b>                | 13C                                                       | <b>Number of Transients</b> | 32                   | <b>Original Points Count</b> | 12076                |
| <b>Pulse Sequence</b>         | zgpg30                                                    | <b>Solvent</b>              | CHLOROFORM-D         | <b>Points Count</b>          | 65536                |
| <b>Temperature (degree C)</b> | 27.000                                                    |                             |                      | <b>Sweep Width (Hz)</b>      | 24154.59             |

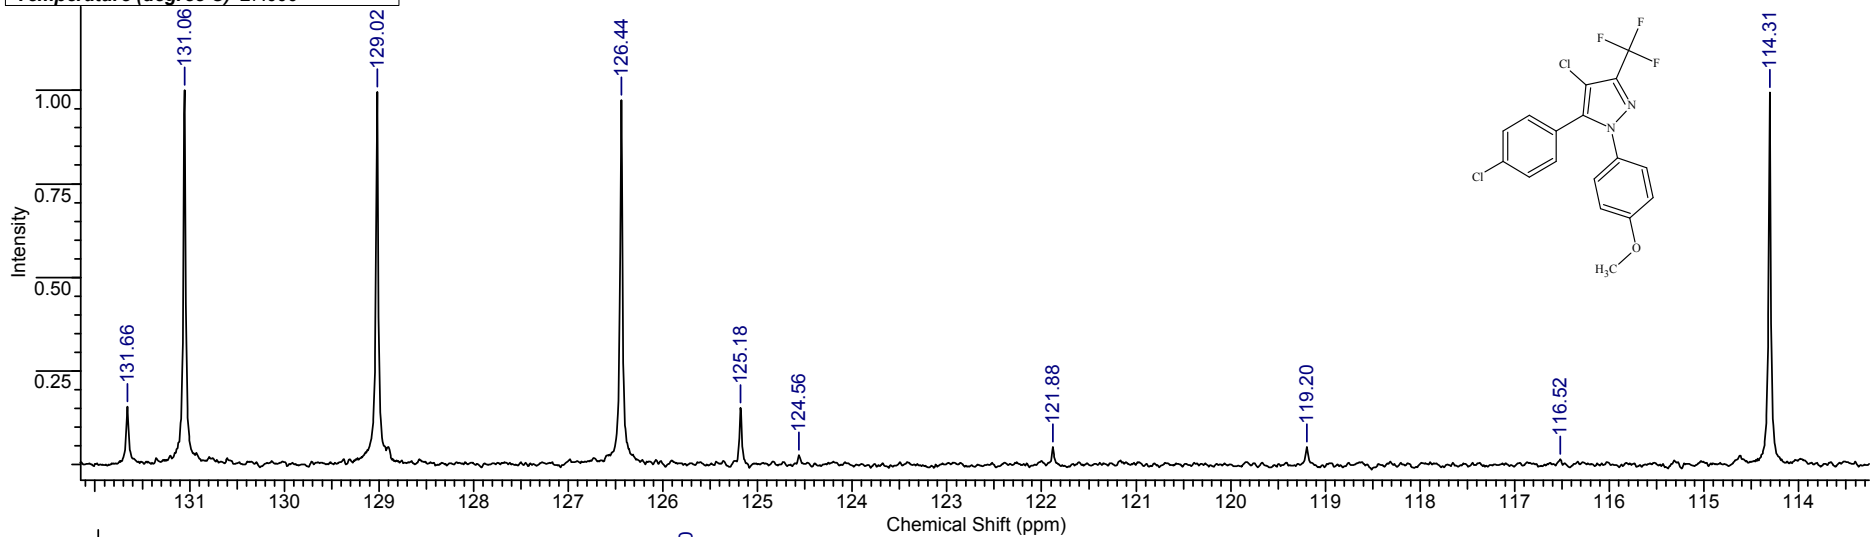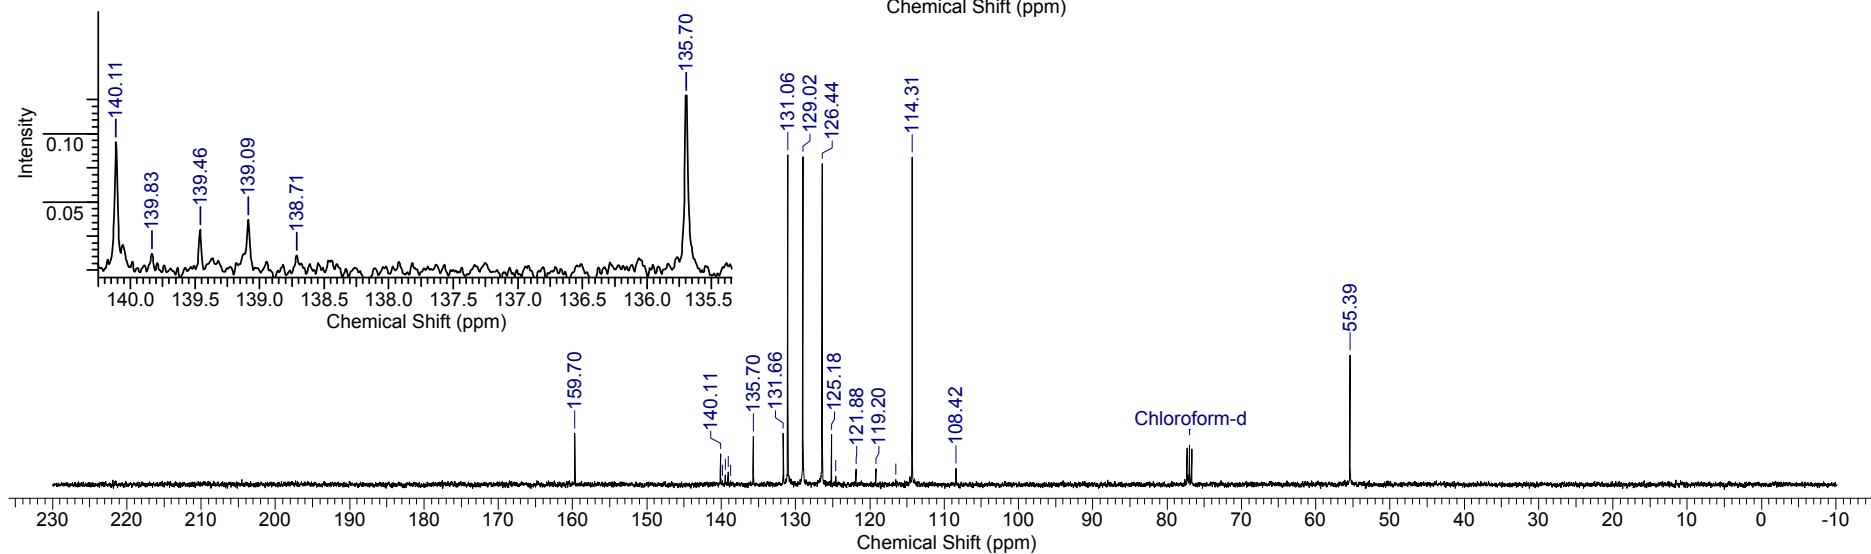

<sup>13</sup>C NMR spectrum of **5b** (100.6 MHz, CDCl<sub>3</sub>)

|                               |                                                                                        |                             |                                                                                 |                              |           |                               |        |
|-------------------------------|----------------------------------------------------------------------------------------|-----------------------------|---------------------------------------------------------------------------------|------------------------------|-----------|-------------------------------|--------|
| <b>FW</b>                     | 387.1827                                                                               | <b>Formula</b>              | C <sub>17</sub> H <sub>11</sub> Cl <sub>2</sub> F <sub>3</sub> N <sub>2</sub> O |                              |           |                               |        |
| <b>Acquisition Time (sec)</b> | 0.2449                                                                                 | <b>Date</b>                 | 31 Jul 2017 15:36:32                                                            |                              |           |                               |        |
| <b>File Name</b>              | C:\BM_DATA\DOCS\SPEC_F_IX-XII.2016\BM-1145.{19F}\BM-1145.{19F}\BM-1145.{19F}_019000fid |                             |                                                                                 | <b>Frequency (MHz)</b>       | 282.39    |                               |        |
| <b>Nucleus</b>                | 19F                                                                                    | <b>Number of Transients</b> | 1                                                                               | <b>Original Points Count</b> | 34018     | <b>Points Count</b>           | 65536  |
| <b>Pulse Sequence</b>         | zg                                                                                     | <b>Solvent</b>              | CHLOROFORM-D                                                                    | <b>Sweep Width (Hz)</b>      | 138888.89 | <b>Temperature (degree C)</b> | 27.000 |

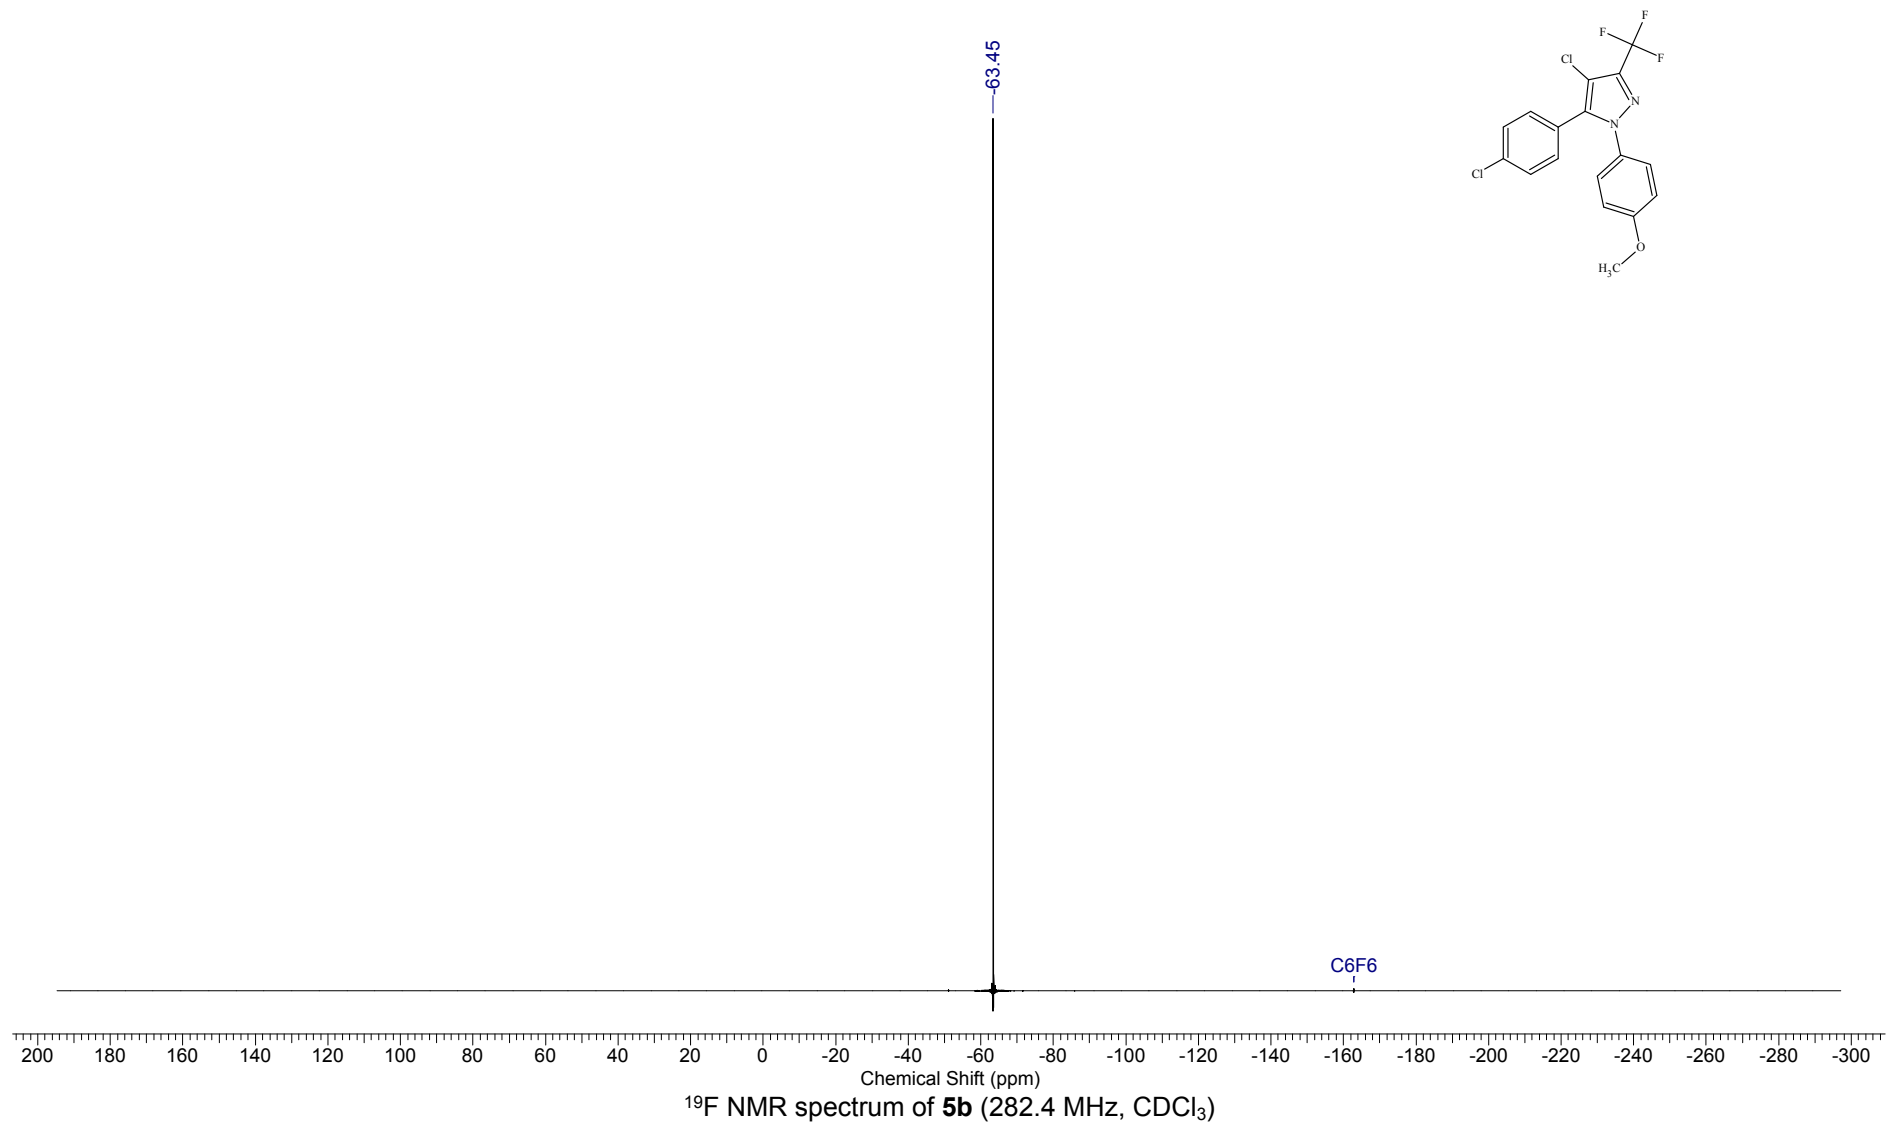

FW 415.8180 Formula  $C_{17}H_{13}ClF_3N_3O_2S$

|                        |                                                                   |                      |                      |                       |          |              |       |
|------------------------|-------------------------------------------------------------------|----------------------|----------------------|-----------------------|----------|--------------|-------|
| Acquisition Time (sec) | 1.3631                                                            | Date                 | 04 Aug 2017 07:51:28 |                       |          |              |       |
| File Name              | C:\BM_DATA\DOCS\SPEC_BM_H,C_V-VIII.2017\BM-1141\BM-1141_001000fid |                      | Frequency (MHz)      | 600.13                |          |              |       |
| Nucleus                | 1H                                                                | Number of Transients | 4                    | Original Points Count | 16384    | Points Count | 16384 |
| Pulse Sequence         | zg30                                                              | Solvent              | CHLOROFORM-D         | Sweep Width (Hz)      | 12019.23 |              |       |
| Temperature (degree C) | 25.000                                                            |                      |                      |                       |          |              |       |

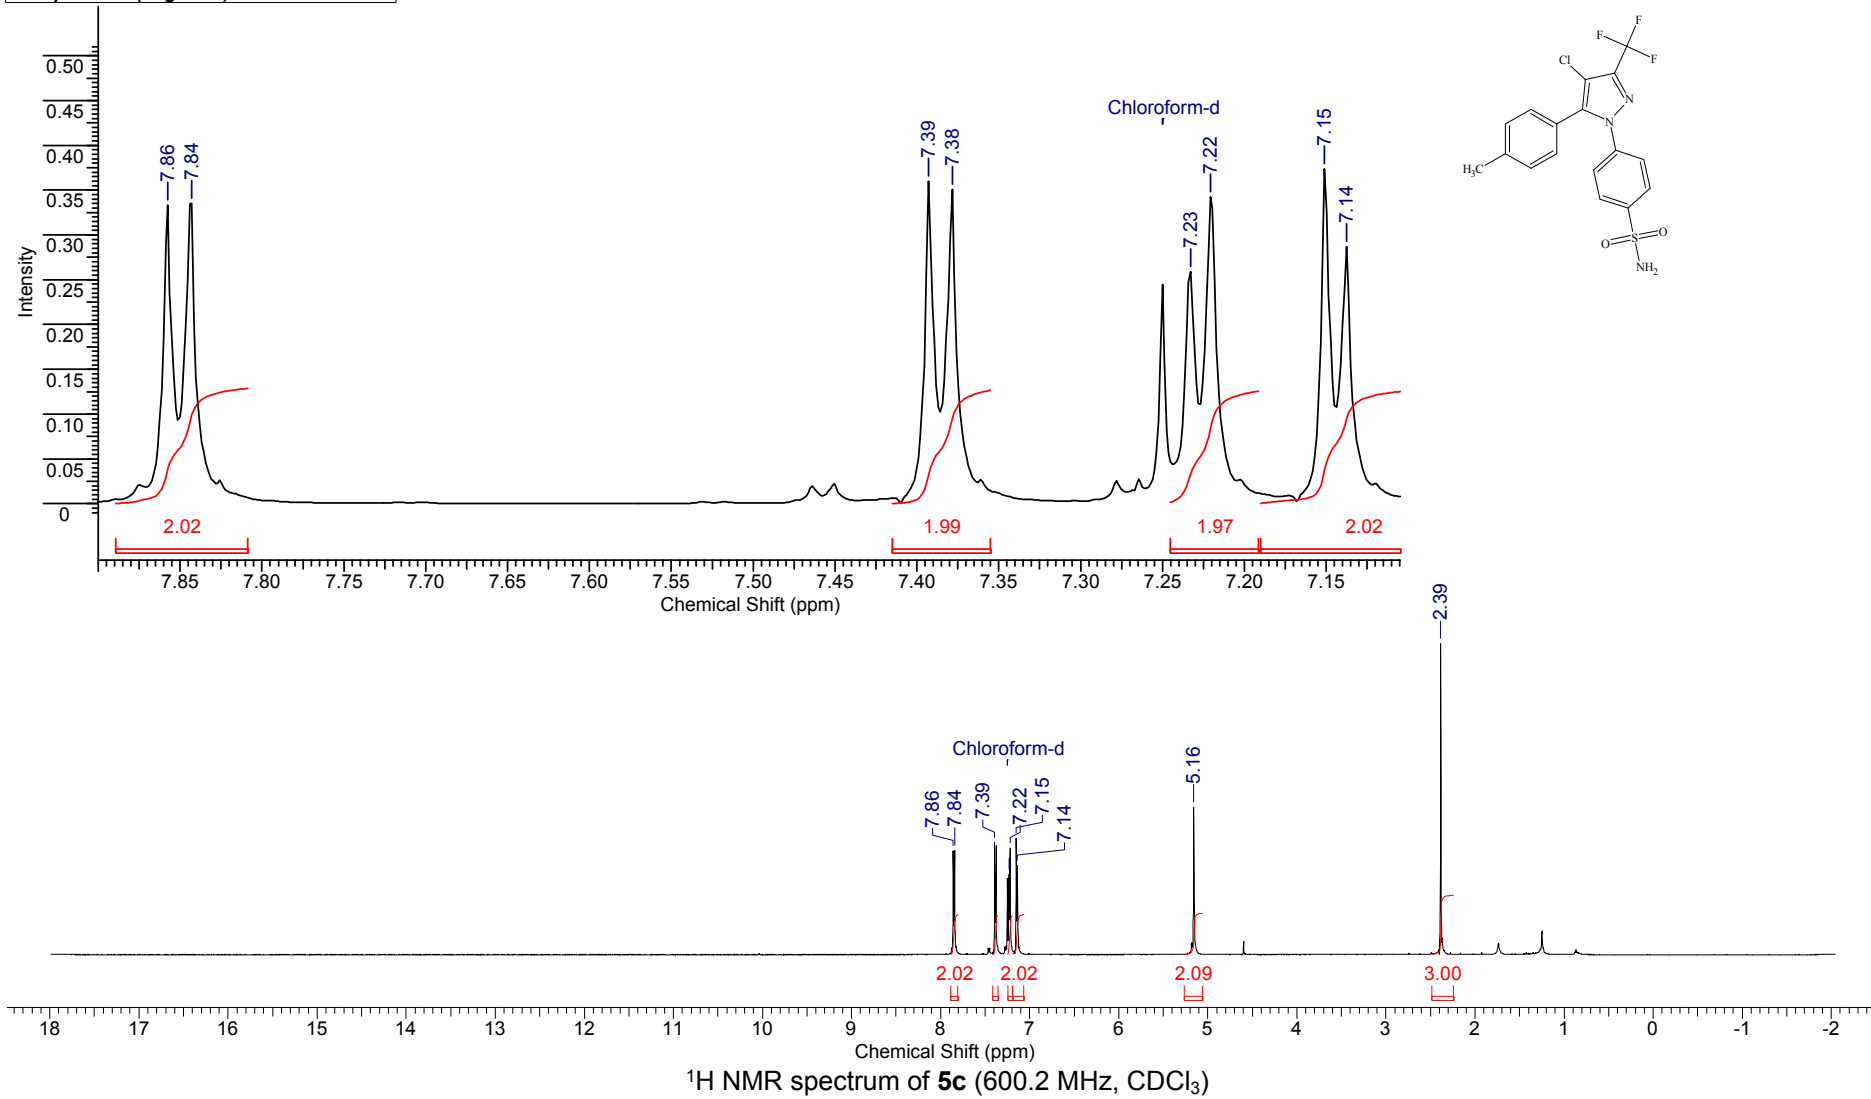



|           |          |                |                                                                                  |
|-----------|----------|----------------|----------------------------------------------------------------------------------|
| <b>FW</b> | 415.8180 | <b>Formula</b> | C <sub>17</sub> H <sub>13</sub> ClF <sub>3</sub> N <sub>3</sub> O <sub>2</sub> S |
|-----------|----------|----------------|----------------------------------------------------------------------------------|

|                               |                                                         |                             |                      |                              |                         |          |
|-------------------------------|---------------------------------------------------------|-----------------------------|----------------------|------------------------------|-------------------------|----------|
| <b>Acquisition Time (sec)</b> | 0.4522                                                  | <b>Date</b>                 | 04 Aug 2017 10:50:36 |                              |                         |          |
| <b>File Name</b>              | C:\BM_DATA\DOCS\SPEC_BM_H,C_V-VIII.2017\BM-1141_013001r |                             |                      | <b>Frequency (MHz)</b>       | 150.90                  |          |
| <b>Nucleus</b>                | 13C                                                     | <b>Number of Transients</b> | 151                  | <b>Original Points Count</b> | 16384                   |          |
| <b>Pulse Sequence</b>         | zpgg30                                                  | <b>Solvent</b>              | CHLOROFORM-D         |                              | <b>Points Count</b>     | 32768    |
| <b>Temperature (degree C)</b> | 25.000                                                  |                             |                      |                              | <b>Sweep Width (Hz)</b> | 36231.88 |

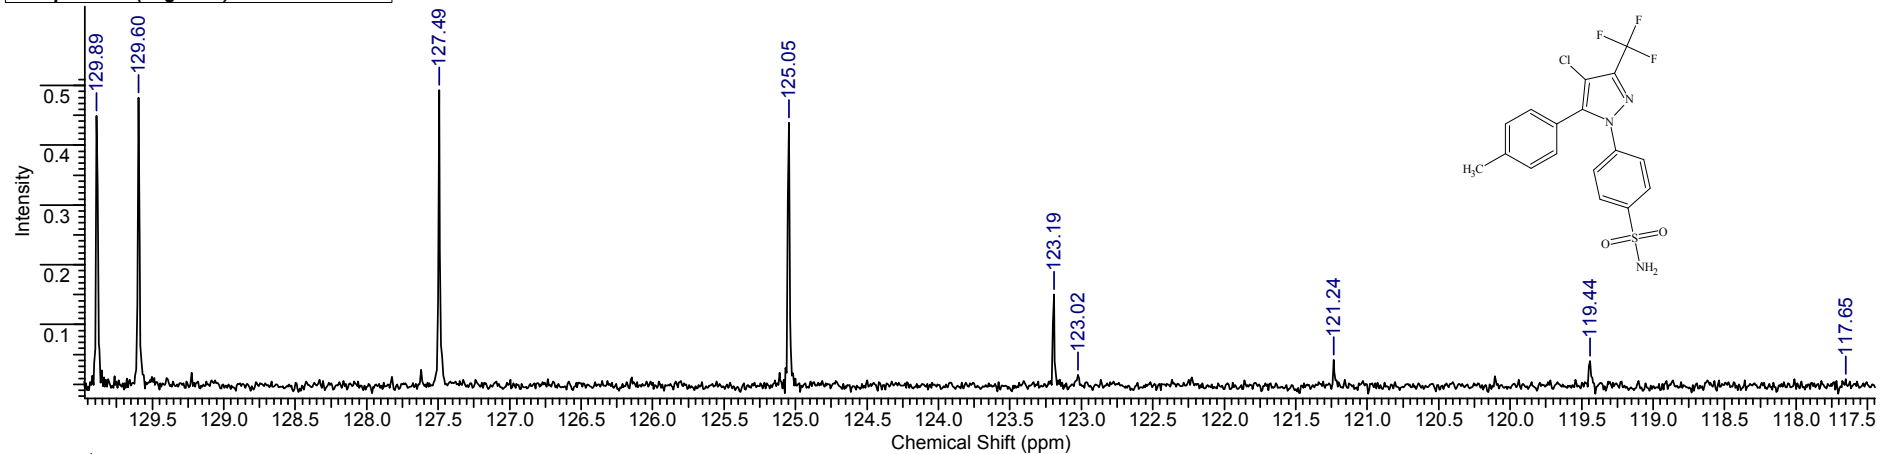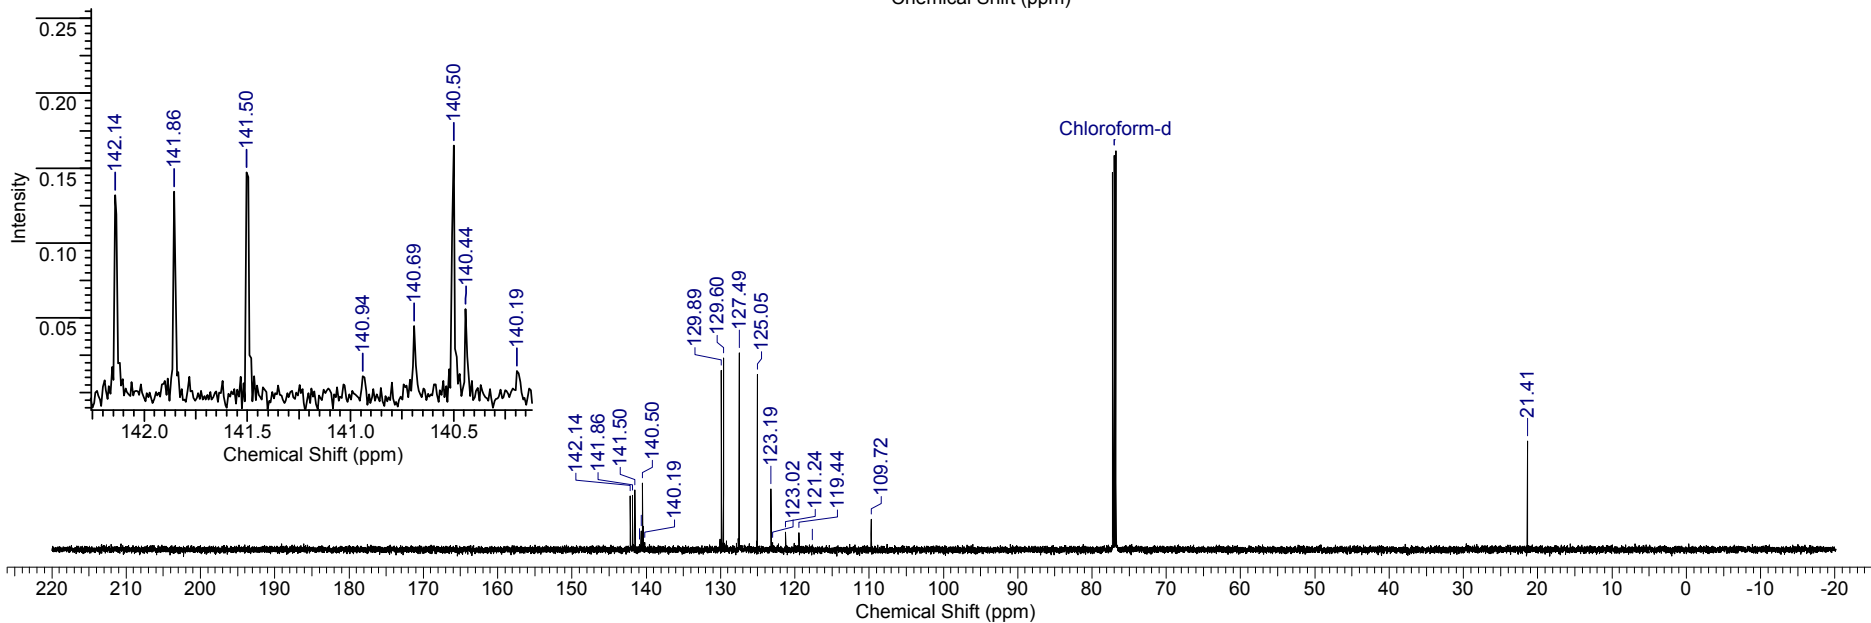

<sup>13</sup>C NMR spectrum of 5c (150.9 MHz, CDCl<sub>3</sub>)

|                    |                                                                                                 |
|--------------------|-------------------------------------------------------------------------------------------------|
| <b>FW</b> 415.8180 | <b>Formula</b> C <sub>17</sub> H <sub>13</sub> ClF <sub>3</sub> N <sub>3</sub> O <sub>2</sub> S |
|--------------------|-------------------------------------------------------------------------------------------------|

|                                                                                           |                                  |                                    |
|-------------------------------------------------------------------------------------------|----------------------------------|------------------------------------|
| <b>Acquisition Time (sec)</b> 0.2449                                                      | <b>Date</b> 07 Aug 2017 15:04:32 | <b>Frequency (MHz)</b> 282.39      |
| <b>File Name</b> C:\BM_DATA\DOCS\SPEC_F_IX-XII.2016\BM-1141.{19F}\BM-1141.{19F}_019000fid |                                  | <b>Points Count</b> 65536          |
| <b>Nucleus</b> 19F                                                                        | <b>Number of Transients</b> 1    | <b>Original Points Count</b> 34018 |
| <b>Pulse Sequence</b> zg                                                                  | <b>Solvent</b> CHLOROFORM-D      | <b>Sweep Width (Hz)</b> 138888.89  |
| <b>Temperature (degree C)</b> 27.000                                                      |                                  |                                    |

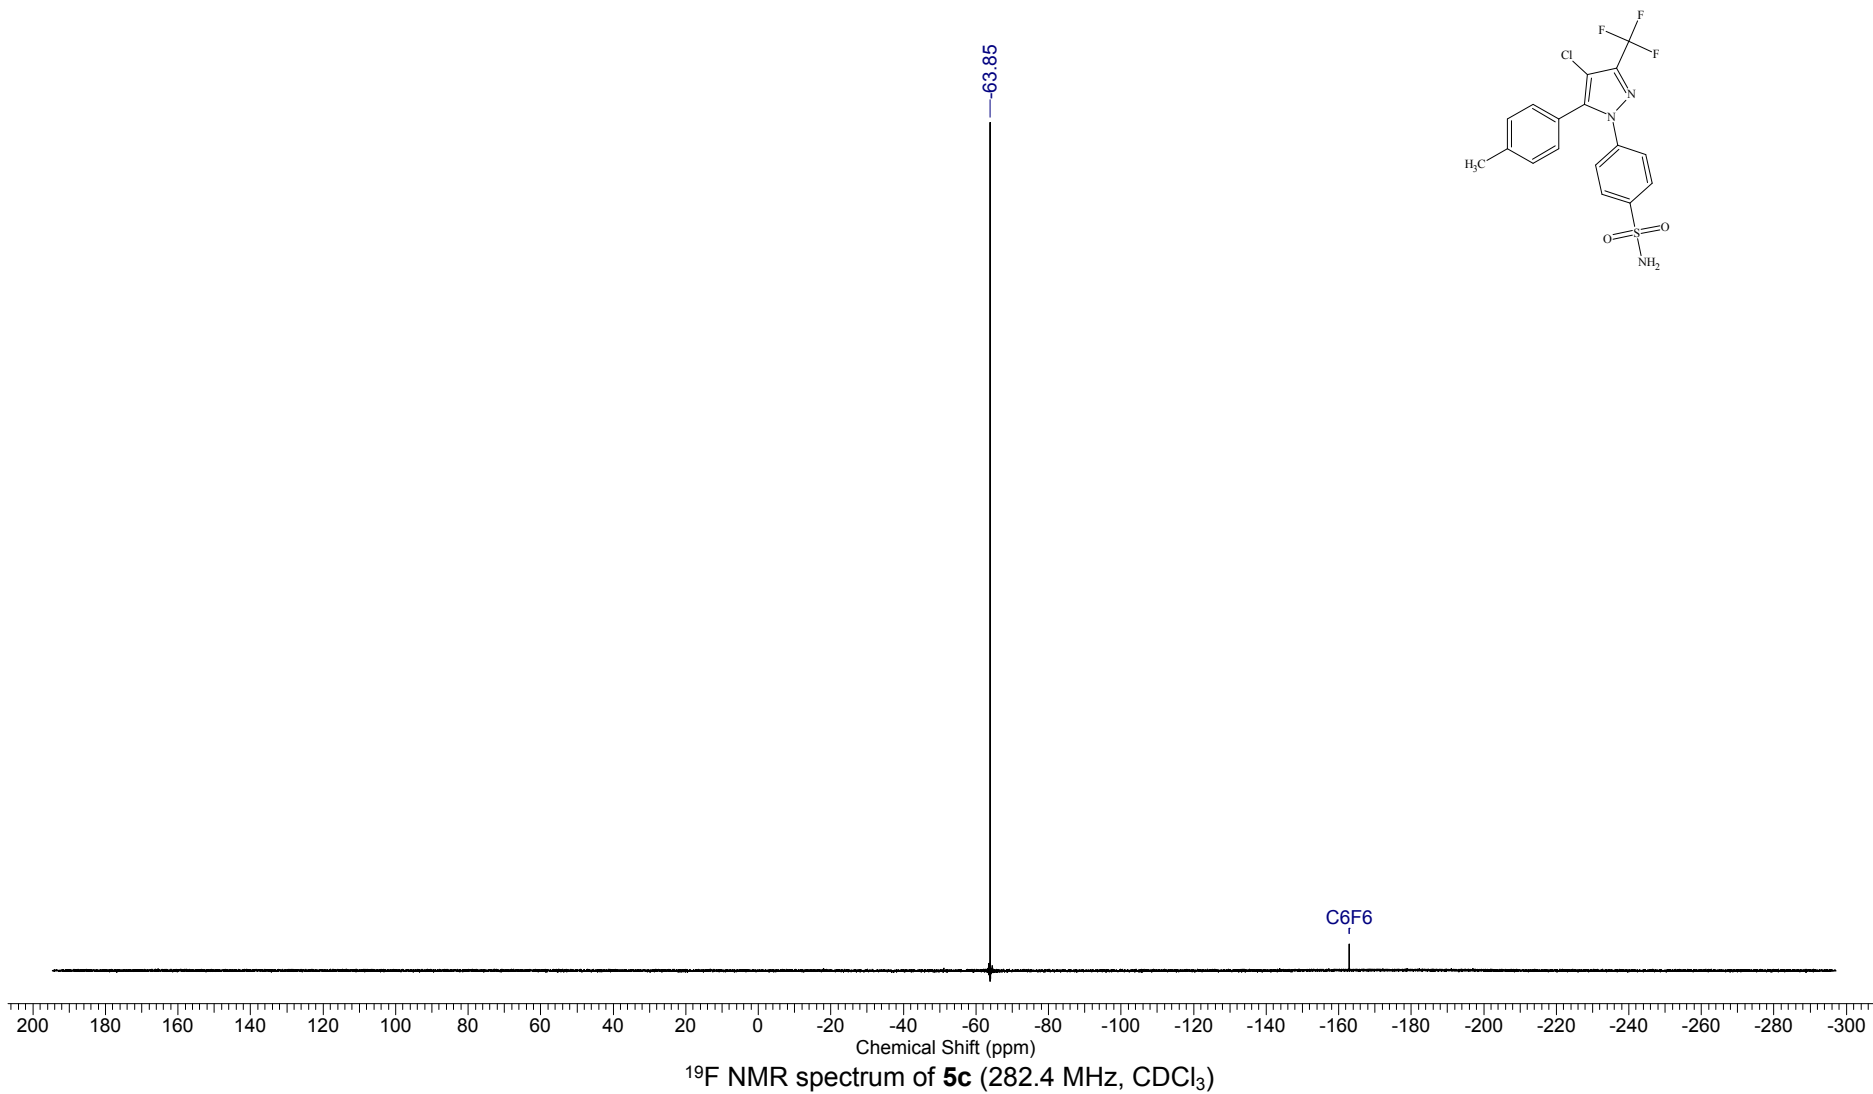

**FW** 431.6340 **Formula** C<sub>17</sub>H<sub>11</sub>BrClF<sub>3</sub>N<sub>2</sub>O

|                               |                                                           |                             |                      |                              |                      |
|-------------------------------|-----------------------------------------------------------|-----------------------------|----------------------|------------------------------|----------------------|
| <b>Acquisition Time (sec)</b> | 2.5559                                                    | <b>Comment</b>              | Imported from UXMNR. | <b>Date</b>                  | 27 Jul 2017 18:11:28 |
| <b>File Name</b>              | C:\BM_DATA\DOCS\SPEC_BM_H_C_V-VIII.2017\BM-1143.H_001001r |                             |                      | <b>Frequency (MHz)</b>       | 400.13               |
| <b>Nucleus</b>                | 1H                                                        | <b>Number of Transients</b> | 4                    | <b>Original Points Count</b> | 16384                |
| <b>Pulse Sequence</b>         | zg30                                                      | <b>Solvent</b>              | CHLOROFORM-D         | <b>Points Count</b>          | 65536                |
| <b>Temperature (degree C)</b> | 27.000                                                    |                             |                      | <b>Sweep Width (Hz)</b>      | 6410.26              |

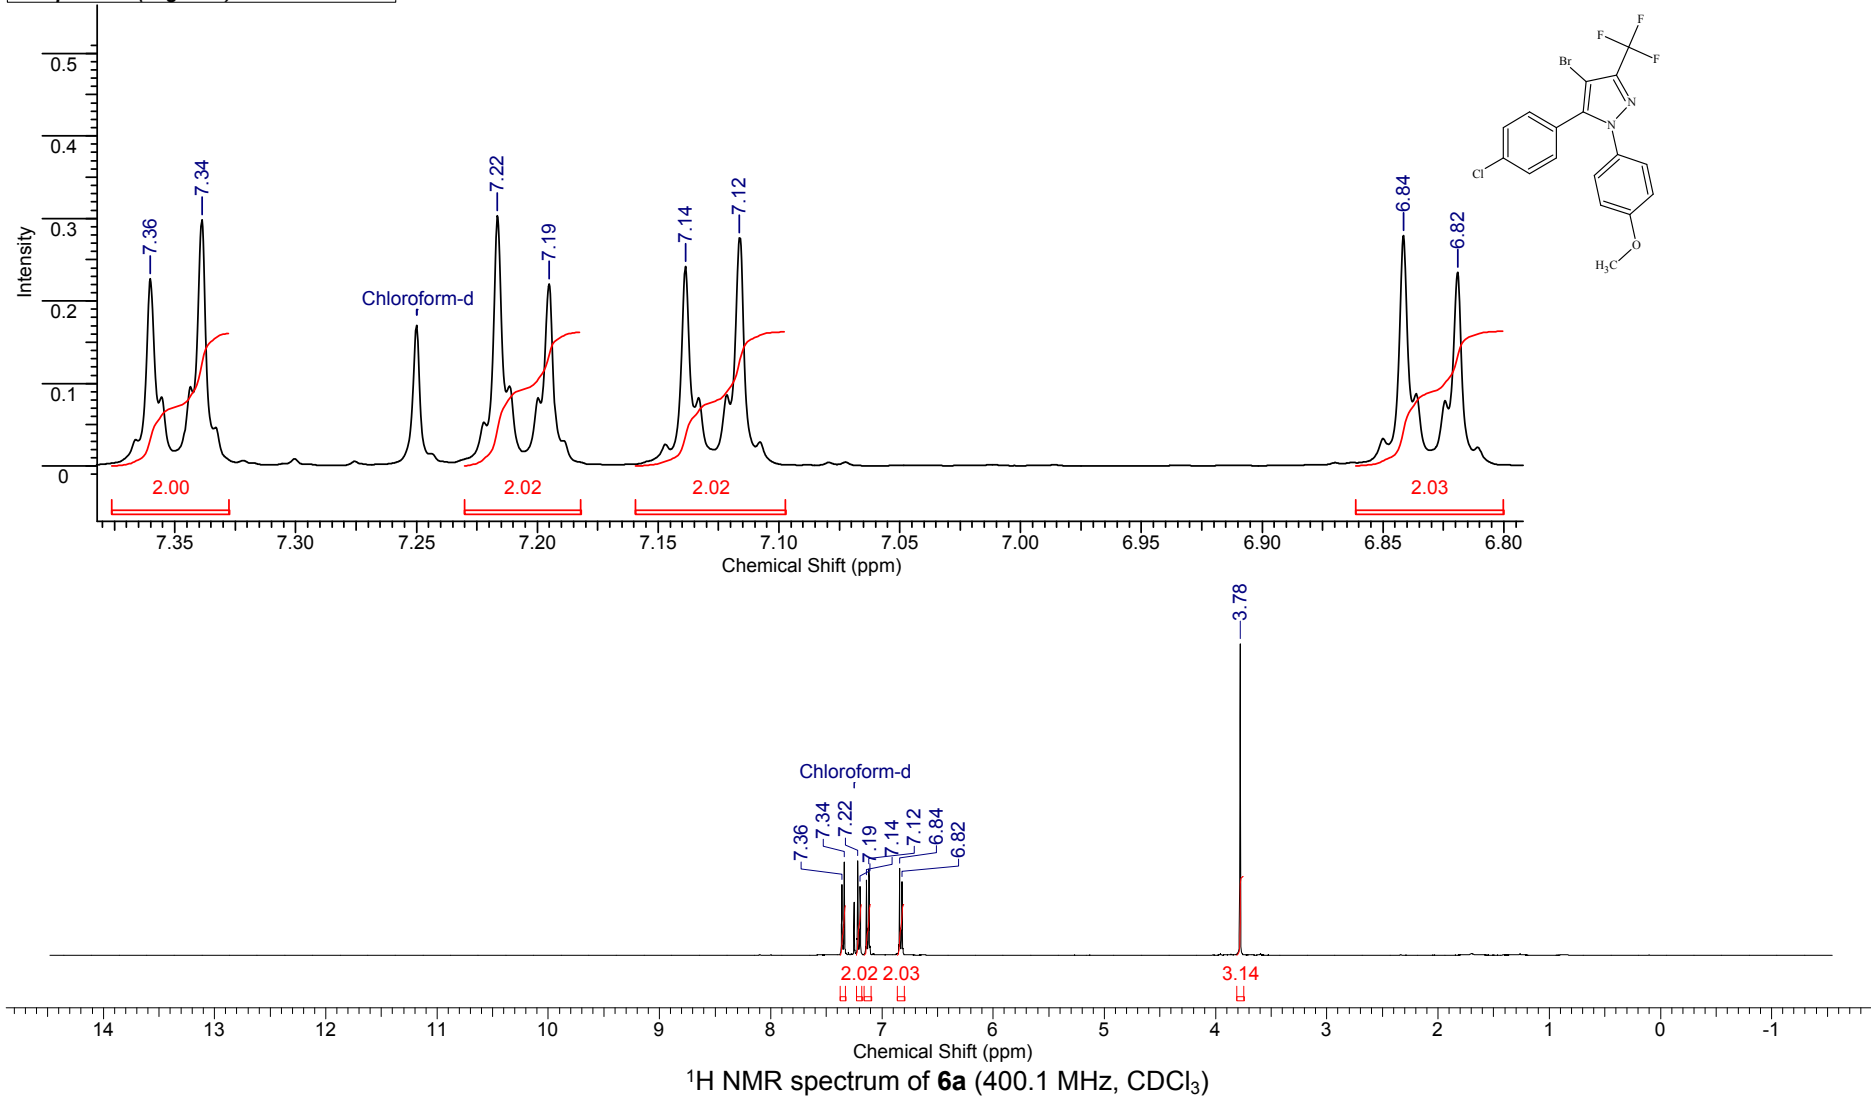

|           |          |                |                                                                     |
|-----------|----------|----------------|---------------------------------------------------------------------|
| <b>FW</b> | 431.6340 | <b>Formula</b> | C <sub>17</sub> H <sub>11</sub> BrClF <sub>3</sub> N <sub>2</sub> O |
|-----------|----------|----------------|---------------------------------------------------------------------|

|                               |                                                           |                             |                      |                              |                      |
|-------------------------------|-----------------------------------------------------------|-----------------------------|----------------------|------------------------------|----------------------|
| <b>Acquisition Time (sec)</b> | 0.4999                                                    | <b>Comment</b>              | Imported from UXMNR. | <b>Date</b>                  | 27 Jul 2017 18:13:34 |
| <b>File Name</b>              | C:\BM_DATA\DOCS\SPEC_BM_H,C_V-VIII.2017\BM-1143.C_002001r |                             |                      | <b>Frequency (MHz)</b>       | 100.61               |
| <b>Nucleus</b>                | 13C                                                       | <b>Number of Transients</b> | 46                   | <b>Original Points Count</b> | 12076                |
| <b>Pulse Sequence</b>         | zgpg30                                                    | <b>Solvent</b>              | CHLOROFORM-D         | <b>Points Count</b>          | 65536                |
| <b>Temperature (degree C)</b> | 27.000                                                    |                             |                      | <b>Sweep Width (Hz)</b>      | 24154.59             |

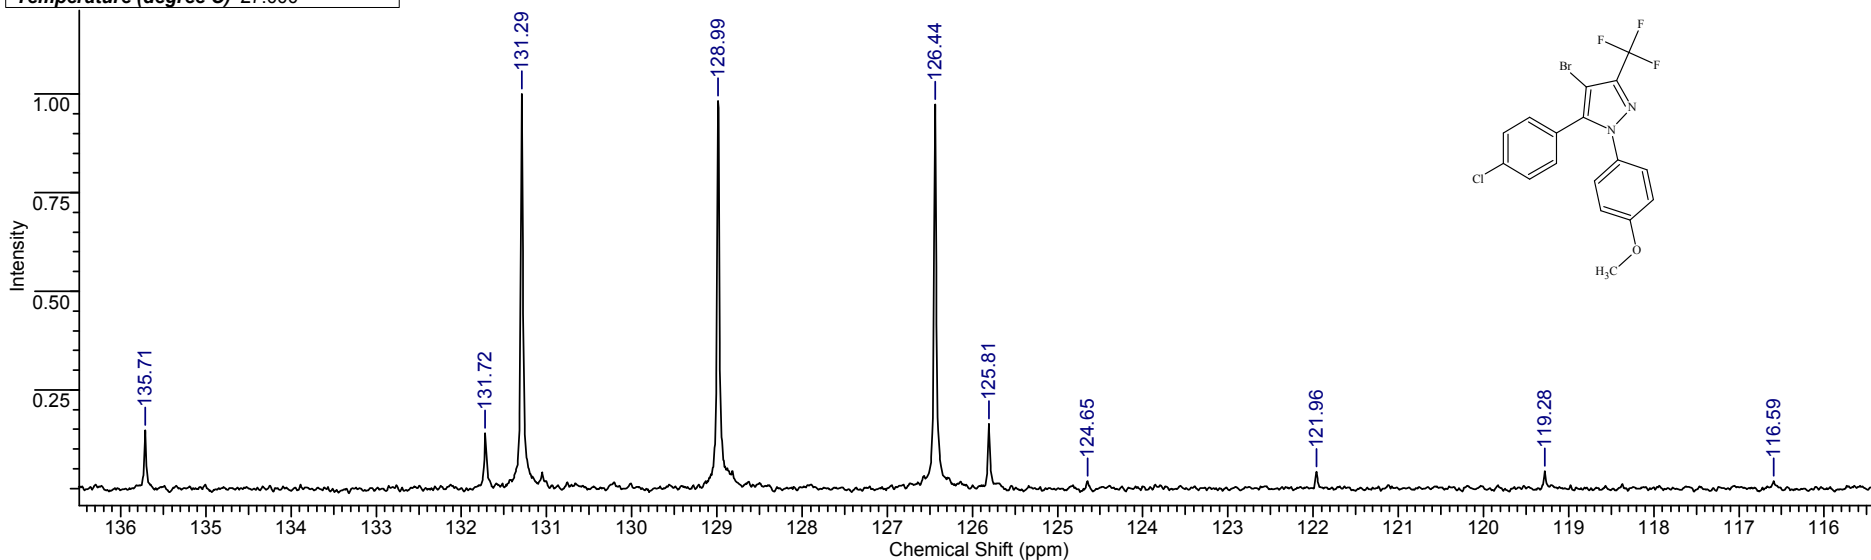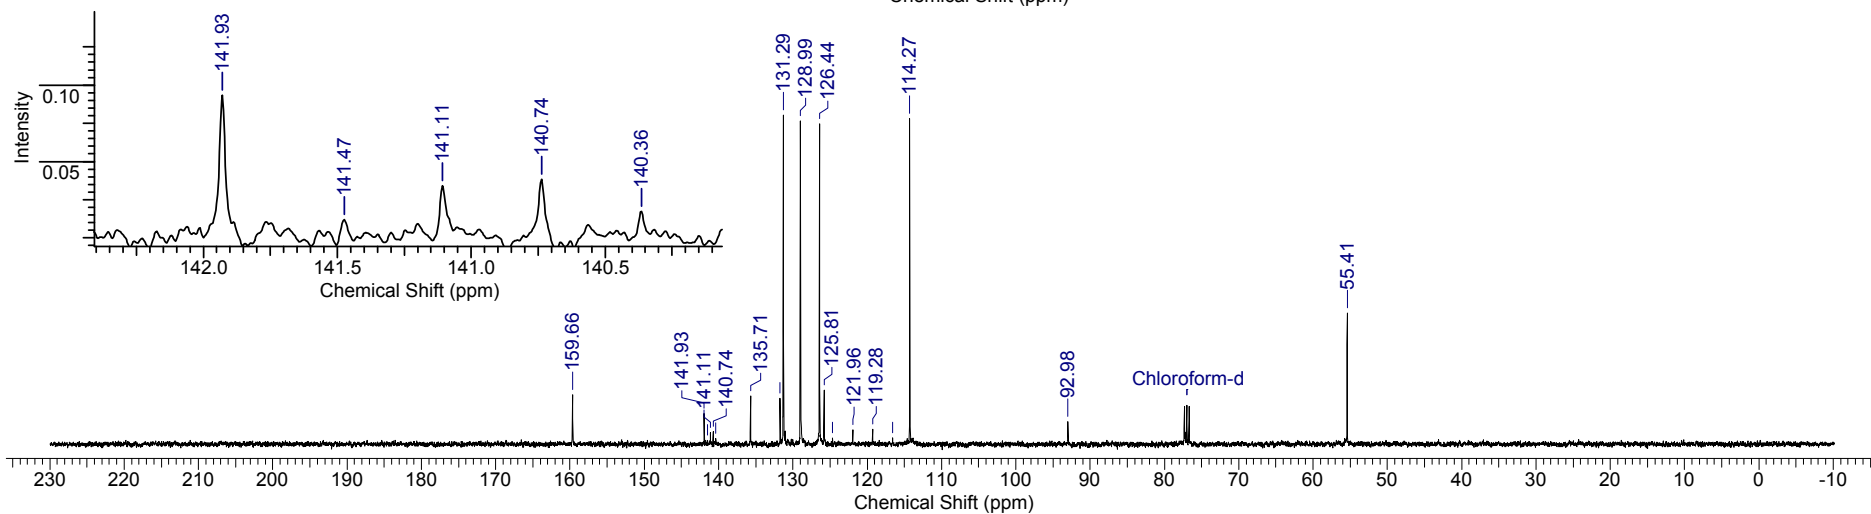

<sup>13</sup>C NMR spectrum of **6a** (100.6 MHz, CDCl<sub>3</sub>)

|                               |                                                                                        |                                                                                    |                      |                              |                        |                               |        |
|-------------------------------|----------------------------------------------------------------------------------------|------------------------------------------------------------------------------------|----------------------|------------------------------|------------------------|-------------------------------|--------|
| <b>FW</b>                     | 431.6340                                                                               | <b>Formula</b> C <sub>17</sub> H <sub>11</sub> BrClF <sub>3</sub> N <sub>2</sub> O |                      |                              |                        |                               |        |
| <b>Acquisition Time (sec)</b> | 0.2449                                                                                 | <b>Date</b>                                                                        | 31 Jul 2017 15:34:24 |                              |                        |                               |        |
| <b>File Name</b>              | C:\BM_DATA\DOCS\SPEC_F_IX-XII.2016\BM-1143.{19F}\BM-1143.{19F}\BM-1143.{19F}_019000fid |                                                                                    |                      |                              | <b>Frequency (MHz)</b> | 282.39                        |        |
| <b>Nucleus</b>                | 19F                                                                                    | <b>Number of Transients</b>                                                        | 1                    | <b>Original Points Count</b> | 34018                  | <b>Points Count</b>           | 65536  |
| <b>Pulse Sequence</b>         | zg                                                                                     | <b>Solvent</b>                                                                     | CHLOROFORM-D         | <b>Sweep Width (Hz)</b>      | 138888.89              | <b>Temperature (degree C)</b> | 27.000 |

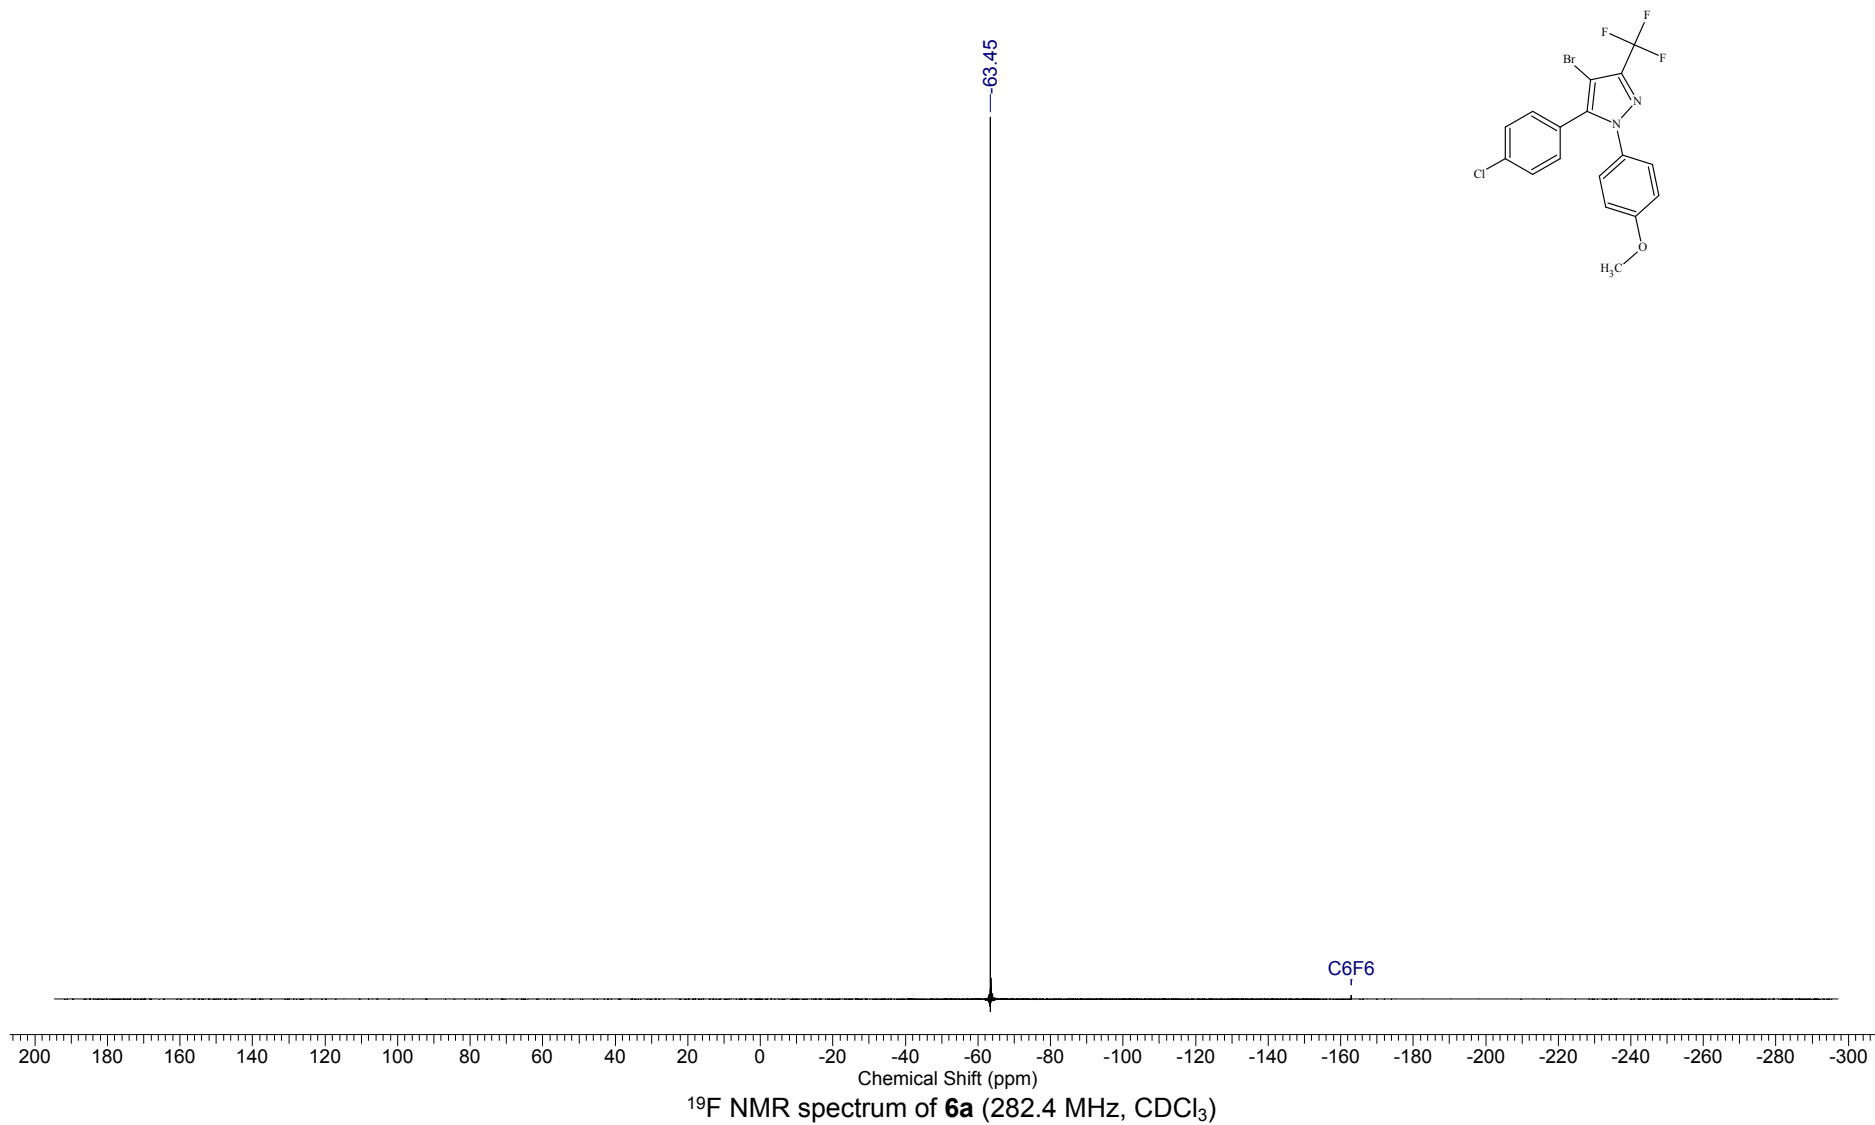

FW 460.2693      Formula C<sub>17</sub>H<sub>13</sub>BrF<sub>3</sub>N<sub>3</sub>O<sub>2</sub>S

|                        |                                                         |                      |                      |                       |                  |          |
|------------------------|---------------------------------------------------------|----------------------|----------------------|-----------------------|------------------|----------|
| Acquisition Time (sec) | 1.3631                                                  | Date                 | 11 Aug 2017 10:43:30 |                       |                  |          |
| File Name              | C:\BM_DATA\DOCS\SPEC_BM_H,C_V-VIII.2017\BM-1152_001001r |                      |                      | Frequency (MHz)       | 600.13           |          |
| Nucleus                | 1H                                                      | Number of Transients | 4                    | Original Points Count | 16384            |          |
| Pulse Sequence         | zg30                                                    | Solvent              | CHLOROFORM-D         |                       | Points Count     | 131072   |
| Temperature (degree C) | 25.000                                                  |                      |                      |                       | Sweep Width (Hz) | 12019.23 |

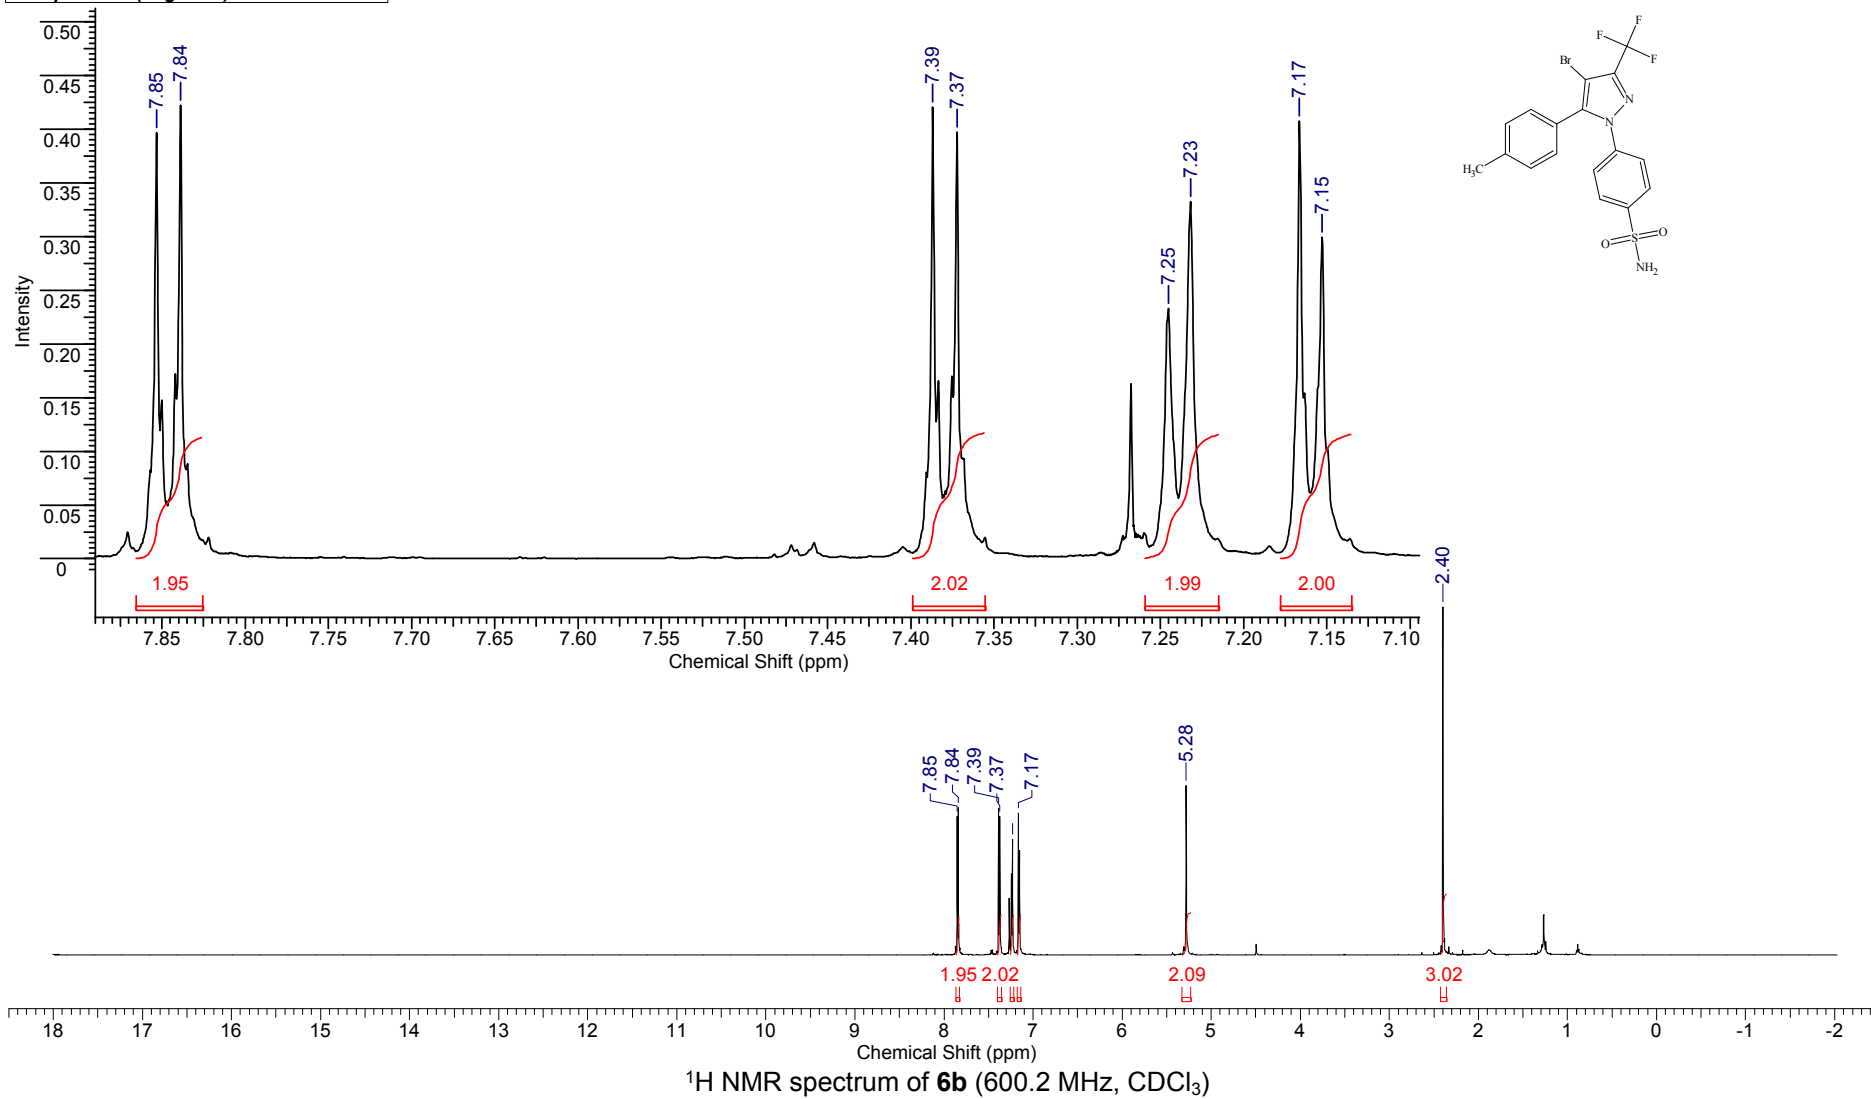

|           |          |                |                                                                                  |
|-----------|----------|----------------|----------------------------------------------------------------------------------|
| <b>FW</b> | 460.2693 | <b>Formula</b> | C <sub>17</sub> H <sub>13</sub> BrF <sub>3</sub> N <sub>3</sub> O <sub>2</sub> S |
|-----------|----------|----------------|----------------------------------------------------------------------------------|

|                               |                                                         |                             |                      |                              |                         |          |
|-------------------------------|---------------------------------------------------------|-----------------------------|----------------------|------------------------------|-------------------------|----------|
| <b>Acquisition Time (sec)</b> | 0.4522                                                  | <b>Date</b>                 | 11 Aug 2017 10:41:00 |                              |                         |          |
| <b>File Name</b>              | C:\BM_DATA\DOCS\SPEC_BM_H,C_V-VIII.2017\BM-1152_013001r |                             |                      | <b>Frequency (MHz)</b>       | 150.90                  |          |
| <b>Nucleus</b>                | 13C                                                     | <b>Number of Transients</b> | 105                  | <b>Original Points Count</b> | 16384                   |          |
| <b>Pulse Sequence</b>         | zgpg30                                                  | <b>Solvent</b>              | CHLOROFORM-D         |                              | <b>Points Count</b>     | 32768    |
| <b>Temperature (degree C)</b> | 25.000                                                  |                             |                      |                              | <b>Sweep Width (Hz)</b> | 36231.88 |

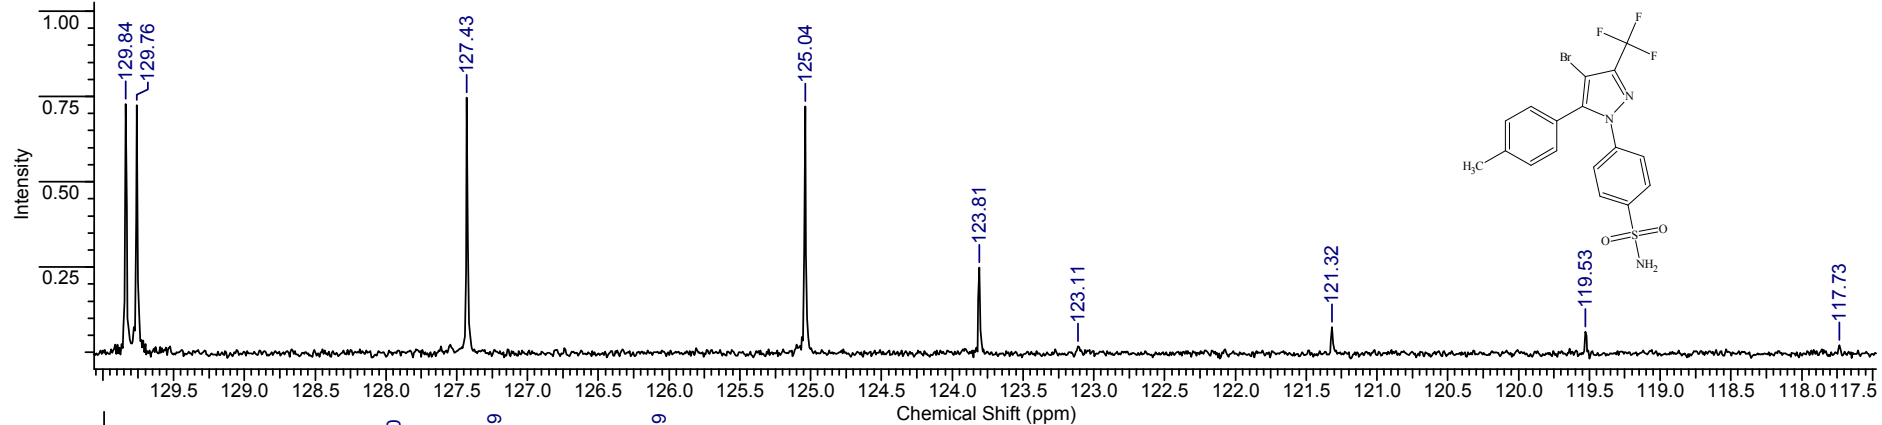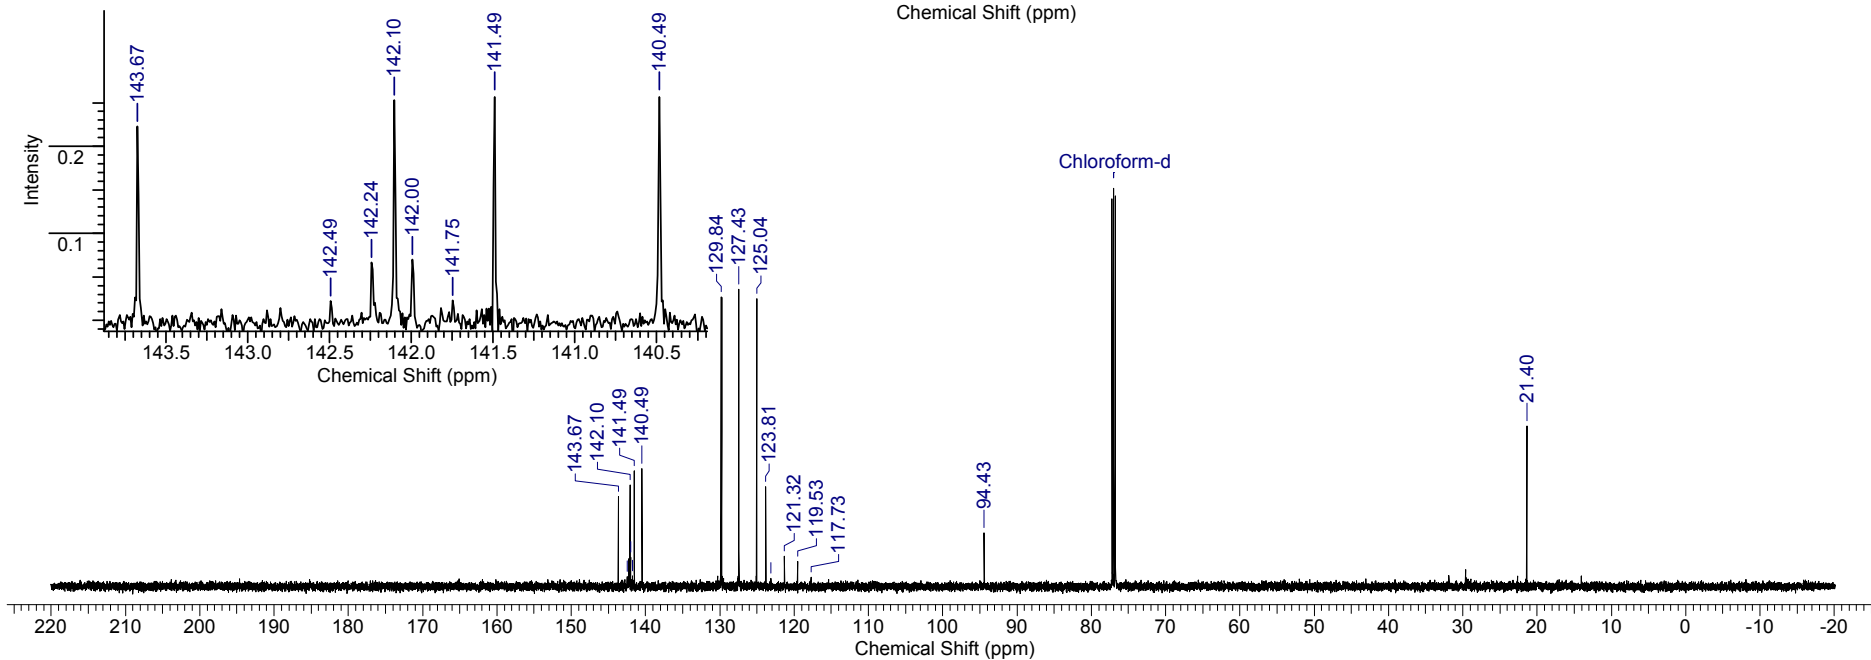

<sup>13</sup>C NMR spectrum of **6b** (150.9 MHz, CDCl<sub>3</sub>)

|                    |                                                                                                 |
|--------------------|-------------------------------------------------------------------------------------------------|
| <b>FW</b> 460.2693 | <b>Formula</b> C <sub>17</sub> H <sub>13</sub> BrF <sub>3</sub> N <sub>3</sub> O <sub>2</sub> S |
|--------------------|-------------------------------------------------------------------------------------------------|

|                                                                                           |                                  |                                    |
|-------------------------------------------------------------------------------------------|----------------------------------|------------------------------------|
| <b>Acquisition Time (sec)</b> 0.2449                                                      | <b>Date</b> 07 Aug 2017 15:02:24 | <b>Frequency (MHz)</b> 282.39      |
| <b>File Name</b> C:\BM_DATA\DOCS\SPEC_F_IX-XII.2016\BM-1152.{19F}\BM-1152.{19F}_019000fid |                                  | <b>Points Count</b> 65536          |
| <b>Nucleus</b> 19F                                                                        | <b>Number of Transients</b> 1    | <b>Original Points Count</b> 34018 |
| <b>Pulse Sequence</b> zg                                                                  | <b>Solvent</b> CHLOROFORM-D      | <b>Sweep Width (Hz)</b> 138888.89  |
| <b>Temperature (degree C)</b> 27.000                                                      |                                  |                                    |

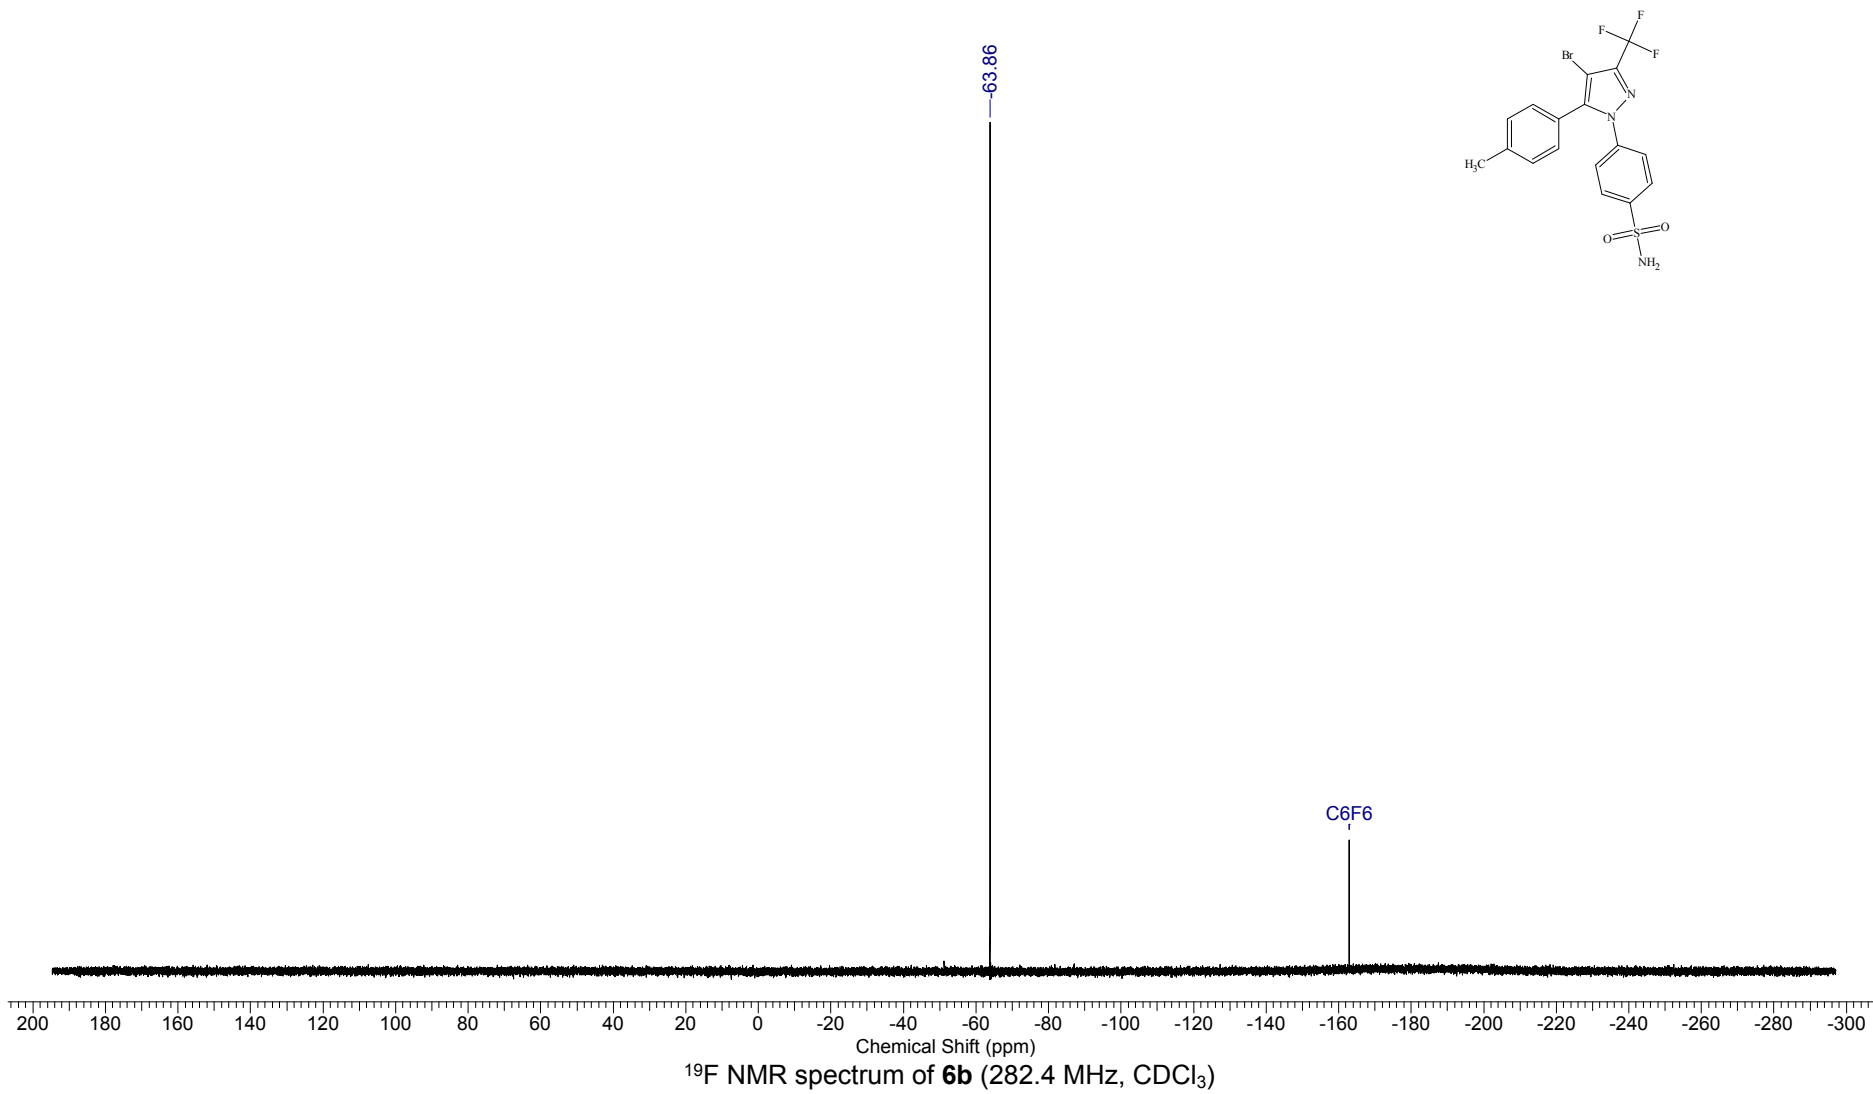



FW 406.3828 Formula  $C_{18}H_{13}F_3N_4O_2S$

|                        |                                                           |                      |                      |                       |                 |                  |          |
|------------------------|-----------------------------------------------------------|----------------------|----------------------|-----------------------|-----------------|------------------|----------|
| Acquisition Time (sec) | 2.6477                                                    | Date                 | 14 Aug 2017 23:57:00 |                       | Frequency (MHz) | 600.13           |          |
| File Name              | C:\BM_DATA\DOCS\SPEC_BM_H,C_V-VIII.2017\BM-1154-p_001001r |                      |                      |                       | Points Count    | 131072           |          |
| Nucleus                | 1H                                                        | Number of Transients | 16                   | Original Points Count | 32768           | Sweep Width (Hz) | 12376.24 |
| Pulse Sequence         | zg                                                        | Solvent              | CHLOROFORM-D         |                       |                 |                  |          |
| Temperature (degree C) | 30.000                                                    |                      |                      |                       |                 |                  |          |

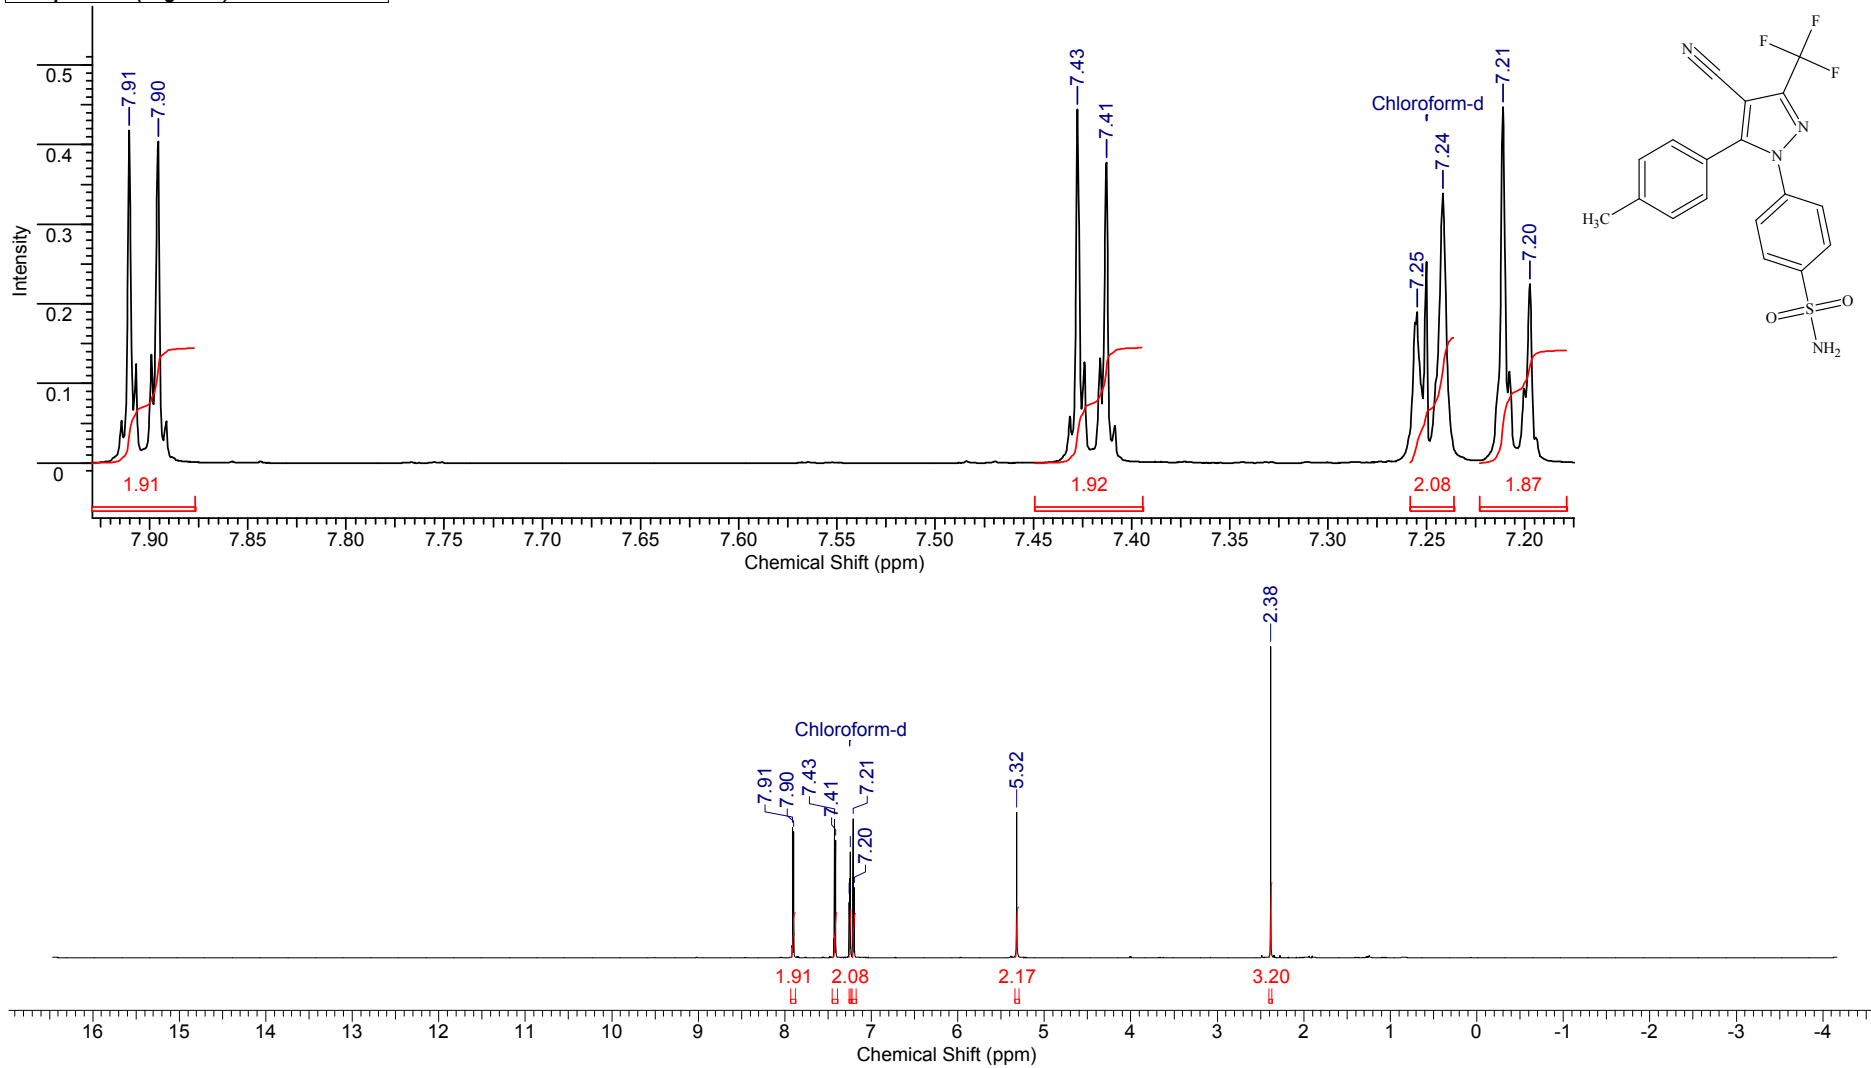

$^1H$  NMR spectrum of 7 (600.2 MHz,  $CDCl_3$ )

|           |          |                |                                                                                |
|-----------|----------|----------------|--------------------------------------------------------------------------------|
| <b>FW</b> | 406.3828 | <b>Formula</b> | C <sub>18</sub> H <sub>13</sub> F <sub>3</sub> N <sub>4</sub> O <sub>2</sub> S |
|-----------|----------|----------------|--------------------------------------------------------------------------------|

|                               |                                                           |                             |                      |                              |          |
|-------------------------------|-----------------------------------------------------------|-----------------------------|----------------------|------------------------------|----------|
| <b>Acquisition Time (sec)</b> | 1.8219                                                    | <b>Date</b>                 | 15 Aug 2017 00:02:16 | <b>Frequency (MHz)</b>       | 150.90   |
| <b>File Name</b>              | C:\BM_DATA\DOCS\SPEC_BM_H,C_V-VIII.2017\BM-1154-p_002001r |                             |                      | <b>Points Count</b>          | 262144   |
| <b>Nucleus</b>                | 13C                                                       | <b>Number of Transients</b> | 50                   | <b>Original Points Count</b> | 65536    |
| <b>Pulse Sequence</b>         | zpgpg                                                     | <b>Solvent</b>              | CHLOROFORM-D         | <b>Sweep Width (Hz)</b>      | 35971.22 |
| <b>Temperature (degree C)</b> | 30.100                                                    |                             |                      |                              |          |

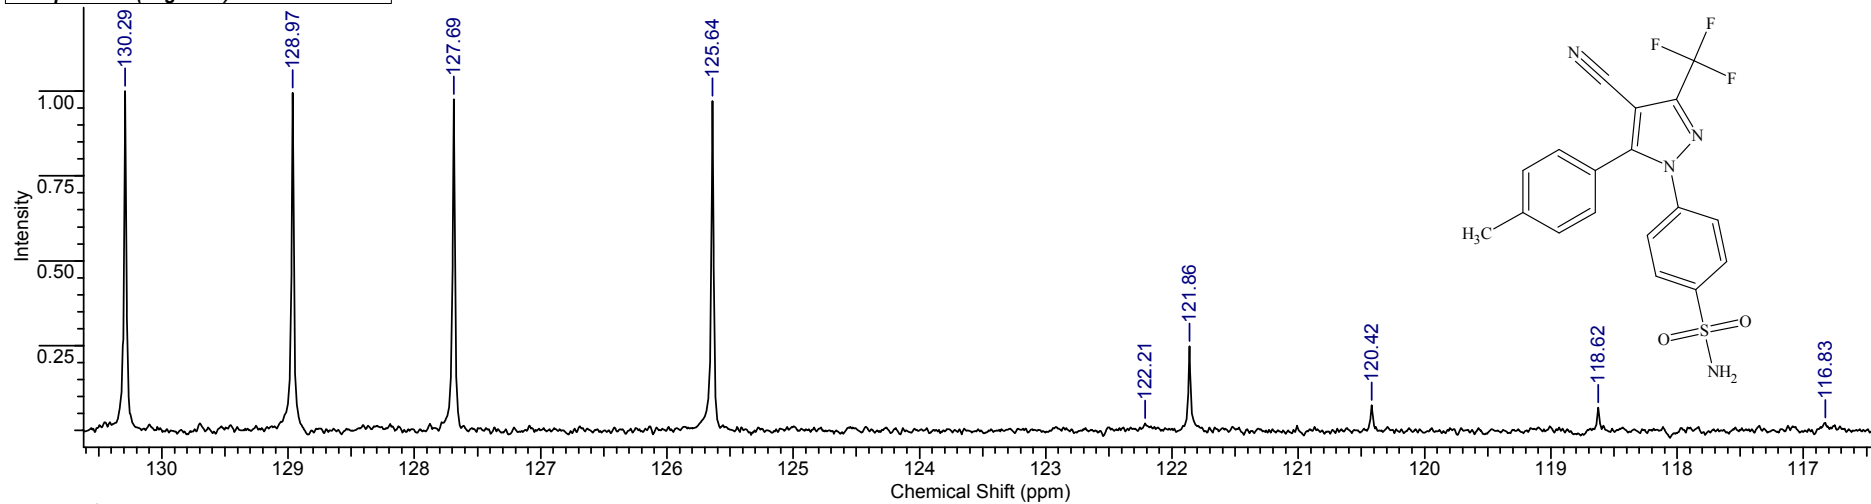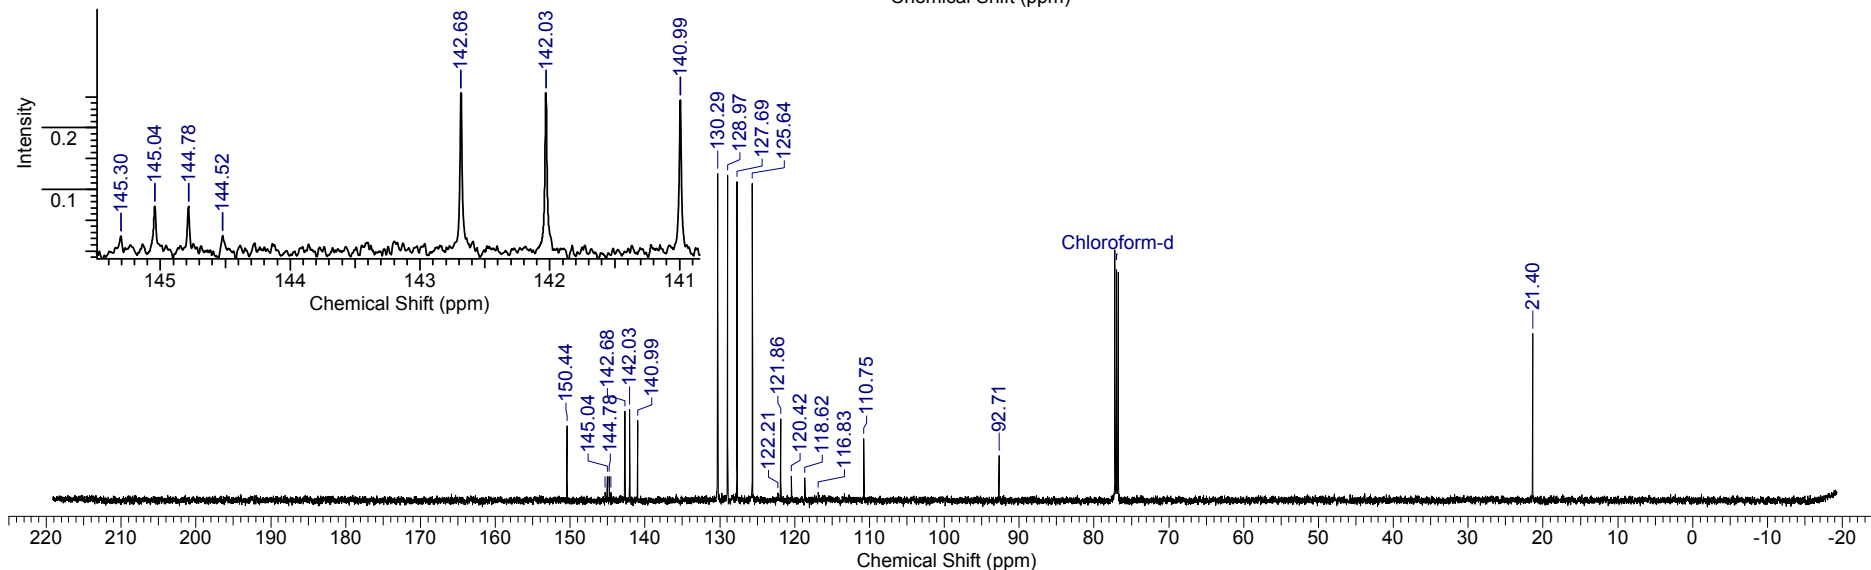

<sup>13</sup>C NMR spectrum of 7 (150.9 MHz, CDCl<sub>3</sub>)

|           |          |                |                                                                                |
|-----------|----------|----------------|--------------------------------------------------------------------------------|
| <b>FW</b> | 406.3828 | <b>Formula</b> | C <sub>18</sub> H <sub>13</sub> F <sub>3</sub> N <sub>4</sub> O <sub>2</sub> S |
|-----------|----------|----------------|--------------------------------------------------------------------------------|

|                               |           |                               |            |                             |                                                                        |                              |        |
|-------------------------------|-----------|-------------------------------|------------|-----------------------------|------------------------------------------------------------------------|------------------------------|--------|
| <b>Acquisition Time (sec)</b> | 1.4680    | <b>Date</b>                   | Sep 4 2017 | <b>File Name</b>            | D:\BN\output\F19\F_2017\2017.09.04\BM-1154-p-F_20170904_01\FLUORINE_01 |                              |        |
| <b>Frequency (MHz)</b>        | 376.32    | <b>Nucleus</b>                | 19F        | <b>Number of Transients</b> | 8                                                                      | <b>Original Points Count</b> | 166818 |
| <b>Points Count</b>           | 262144    | <b>Pulse Sequence</b>         | s2pul      | <b>Solvent</b>              | CHLOROFORM-D                                                           |                              |        |
| <b>Sweep Width (Hz)</b>       | 113636.37 | <b>Temperature (degree C)</b> | 22.000     |                             |                                                                        |                              |        |

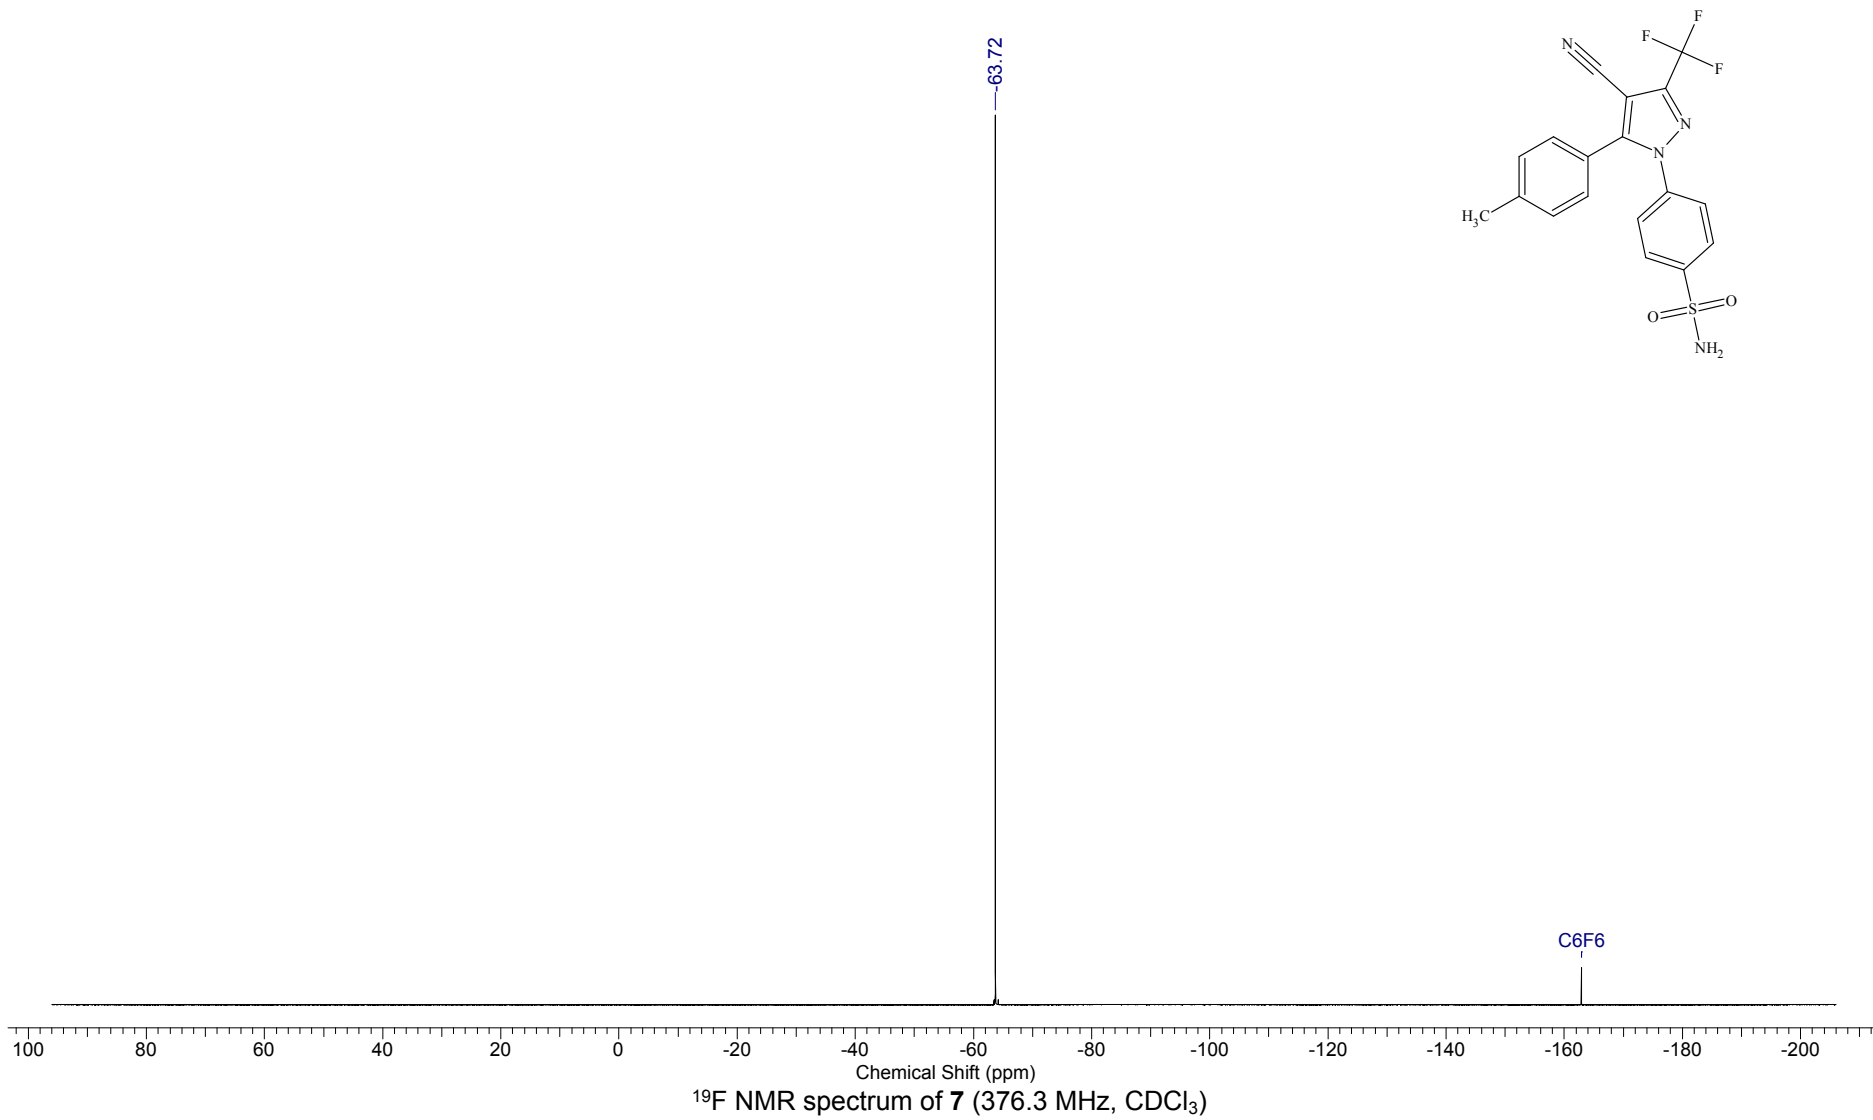

FW 457.4692 Formula C<sub>23</sub>H<sub>18</sub>F<sub>3</sub>N<sub>3</sub>O<sub>2</sub>S

|                        |                                                           |                      |                      |                       |          |
|------------------------|-----------------------------------------------------------|----------------------|----------------------|-----------------------|----------|
| Acquisition Time (sec) | 1.3631                                                    | Date                 | 15 Aug 2017 10:51:42 | Frequency (MHz)       | 600.13   |
| File Name              | C:\BM_DATA\DOCS\SPEC_BM_H,C_V-VIII.2017\BM-1155-p_001001r |                      |                      | Points Count          | 131072   |
| Nucleus                | 1H                                                        | Number of Transients | 4                    | Original Points Count | 16384    |
| Pulse Sequence         | zg30                                                      | Solvent              | CHLOROFORM-D         | Sweep Width (Hz)      | 12019.23 |
| Temperature (degree C) | 25.000                                                    |                      |                      |                       |          |

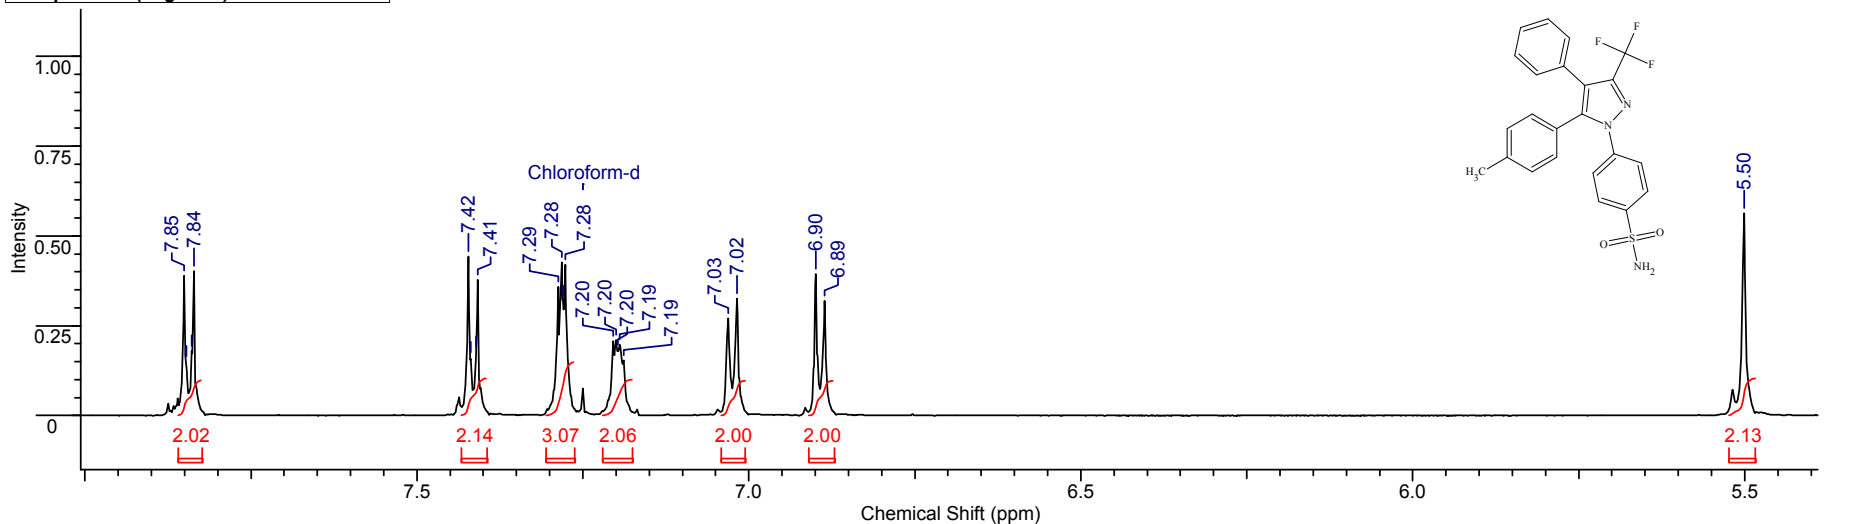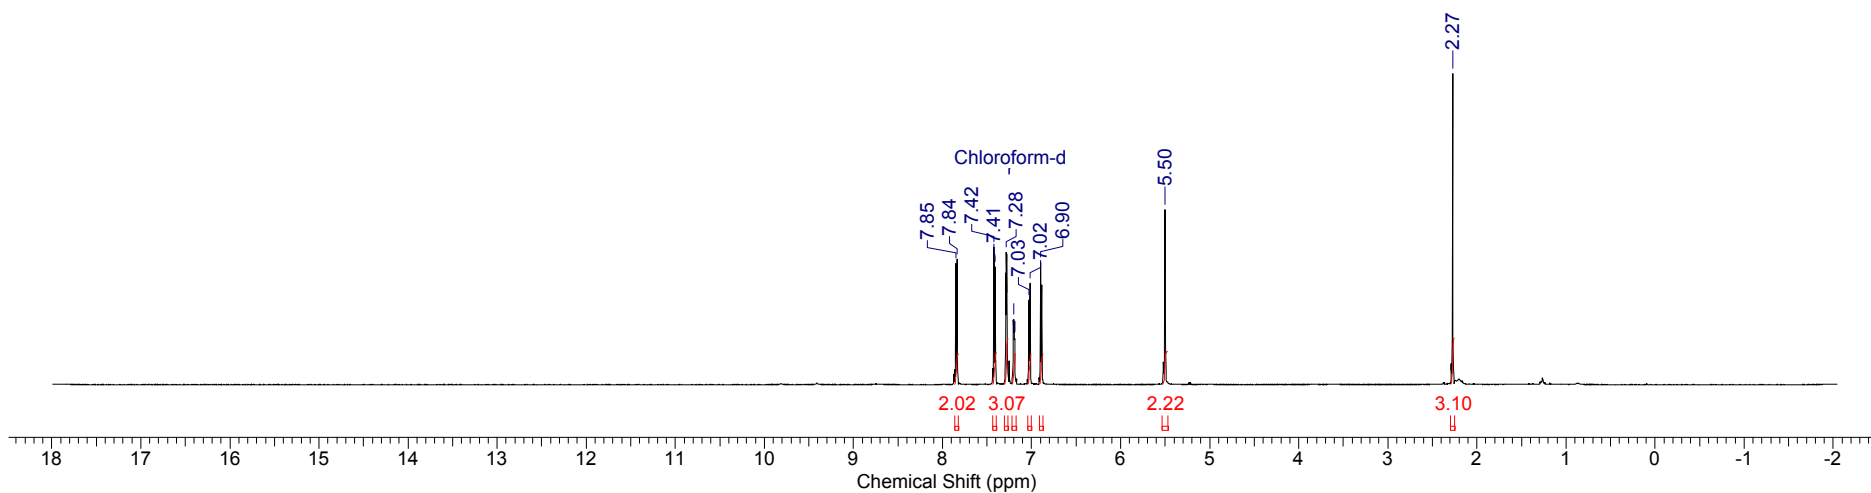

<sup>1</sup>H NMR spectrum of 8 (600.2 MHz, CDCl<sub>3</sub>)

|           |          |                |                                                                                |
|-----------|----------|----------------|--------------------------------------------------------------------------------|
| <b>FW</b> | 457.4692 | <b>Formula</b> | C <sub>23</sub> H <sub>18</sub> F <sub>3</sub> N <sub>3</sub> O <sub>2</sub> S |
|-----------|----------|----------------|--------------------------------------------------------------------------------|

|                               |                                                           |                             |                      |                              |          |
|-------------------------------|-----------------------------------------------------------|-----------------------------|----------------------|------------------------------|----------|
| <b>Acquisition Time (sec)</b> | 0.4522                                                    | <b>Date</b>                 | 15 Aug 2017 10:49:50 | <b>Frequency (MHz)</b>       | 150.90   |
| <b>File Name</b>              | C:\BM_DATA\DOCS\SPEC_BM_H,C_V-VIII.2017\BM-1155-p_013001r |                             |                      | <b>Points Count</b>          | 32768    |
| <b>Nucleus</b>                | <sup>13</sup> C                                           | <b>Number of Transients</b> | 98                   | <b>Original Points Count</b> | 16384    |
| <b>Pulse Sequence</b>         | zpgpg30                                                   | <b>Solvent</b>              | CHLOROFORM-D         | <b>Sweep Width (Hz)</b>      | 36231.88 |
| <b>Temperature (degree C)</b> | 25.000                                                    |                             |                      |                              |          |

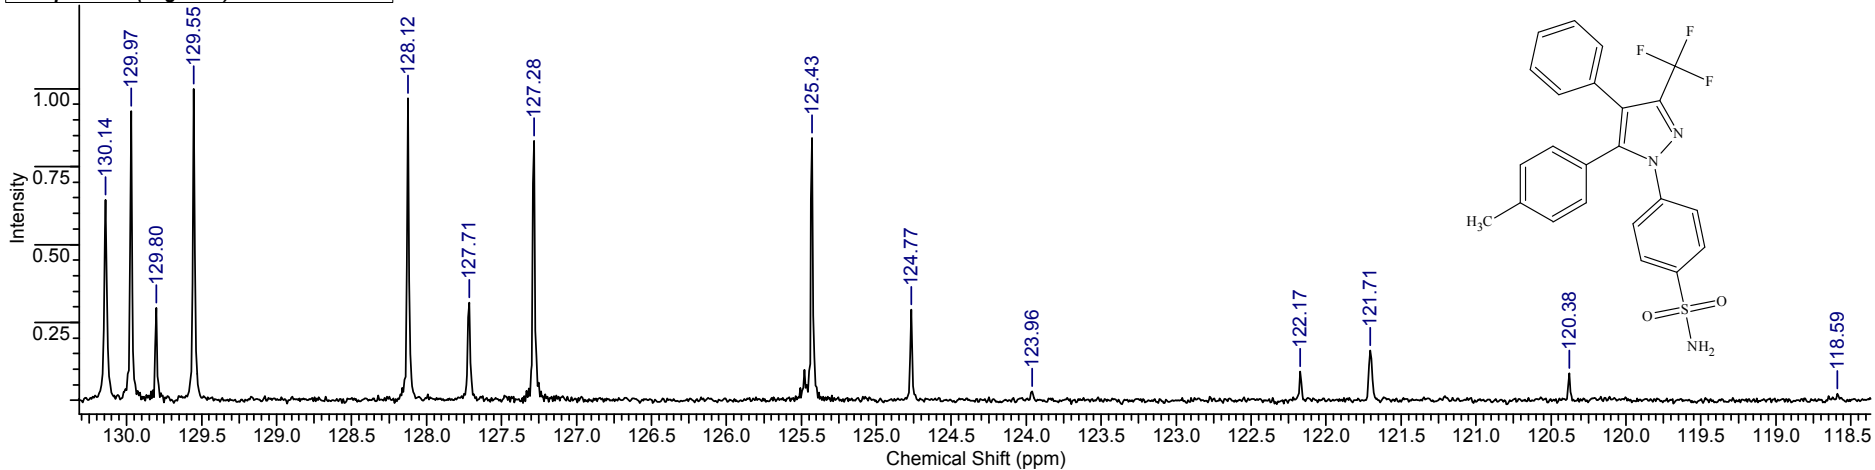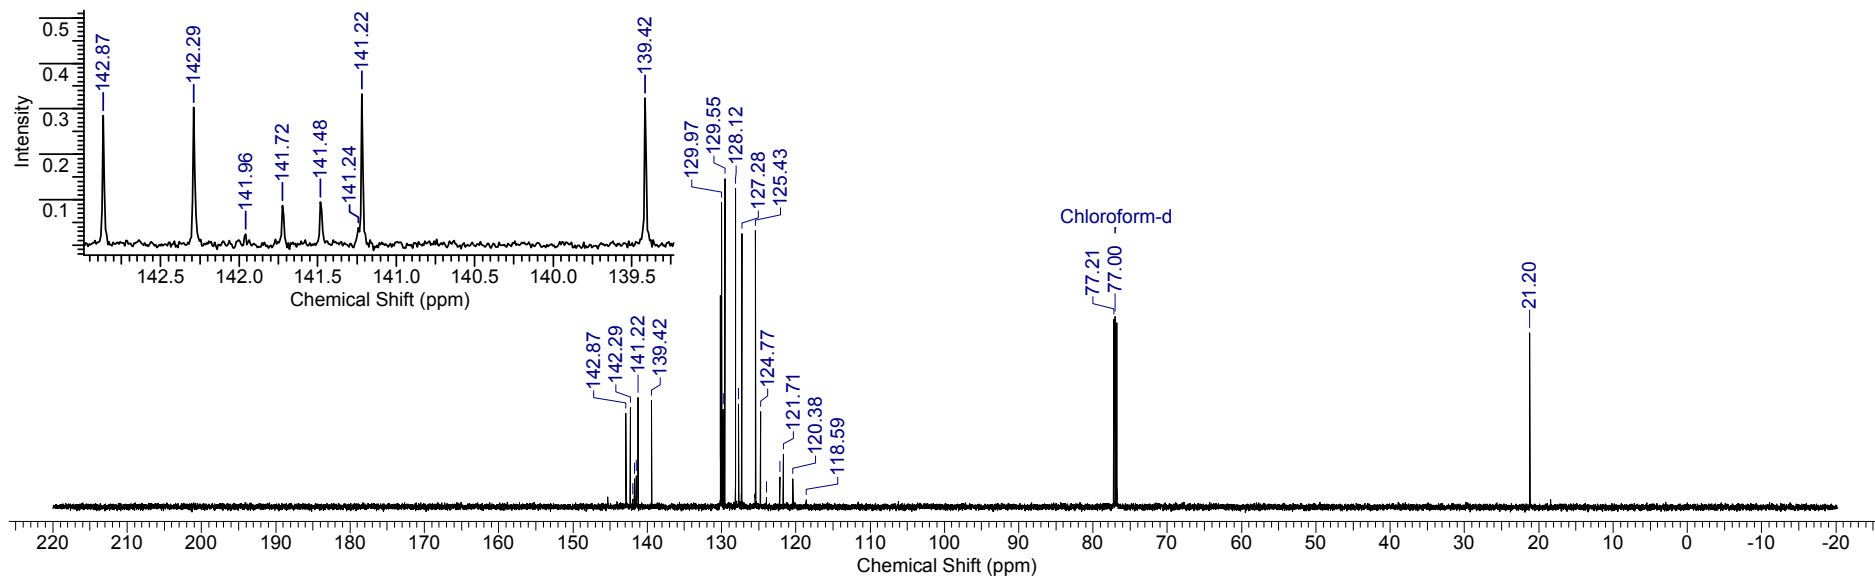

<sup>13</sup>C NMR spectrum of **8** (150.9 MHz, CDCl<sub>3</sub>)

|           |          |                |                                                                                |
|-----------|----------|----------------|--------------------------------------------------------------------------------|
| <b>FW</b> | 457.4692 | <b>Formula</b> | C <sub>23</sub> H <sub>18</sub> F <sub>3</sub> N <sub>3</sub> O <sub>2</sub> S |
|-----------|----------|----------------|--------------------------------------------------------------------------------|

|                               |           |                               |            |                             |                                                                        |                              |        |
|-------------------------------|-----------|-------------------------------|------------|-----------------------------|------------------------------------------------------------------------|------------------------------|--------|
| <b>Acquisition Time (sec)</b> | 1.4680    | <b>Date</b>                   | Sep 4 2017 | <b>File Name</b>            | D:\BN\output\F19\F_2017\2017.09.04\BM-1155-p-F_20170904_01\FLUORINE_01 |                              |        |
| <b>Frequency (MHz)</b>        | 376.32    | <b>Nucleus</b>                | 19F        | <b>Number of Transients</b> | 8                                                                      | <b>Original Points Count</b> | 166818 |
| <b>Points Count</b>           | 262144    | <b>Pulse Sequence</b>         | s2pul      | <b>Solvent</b>              | CHLOROFORM-D                                                           |                              |        |
| <b>Sweep Width (Hz)</b>       | 113636.37 | <b>Temperature (degree C)</b> | 22.000     |                             |                                                                        |                              |        |

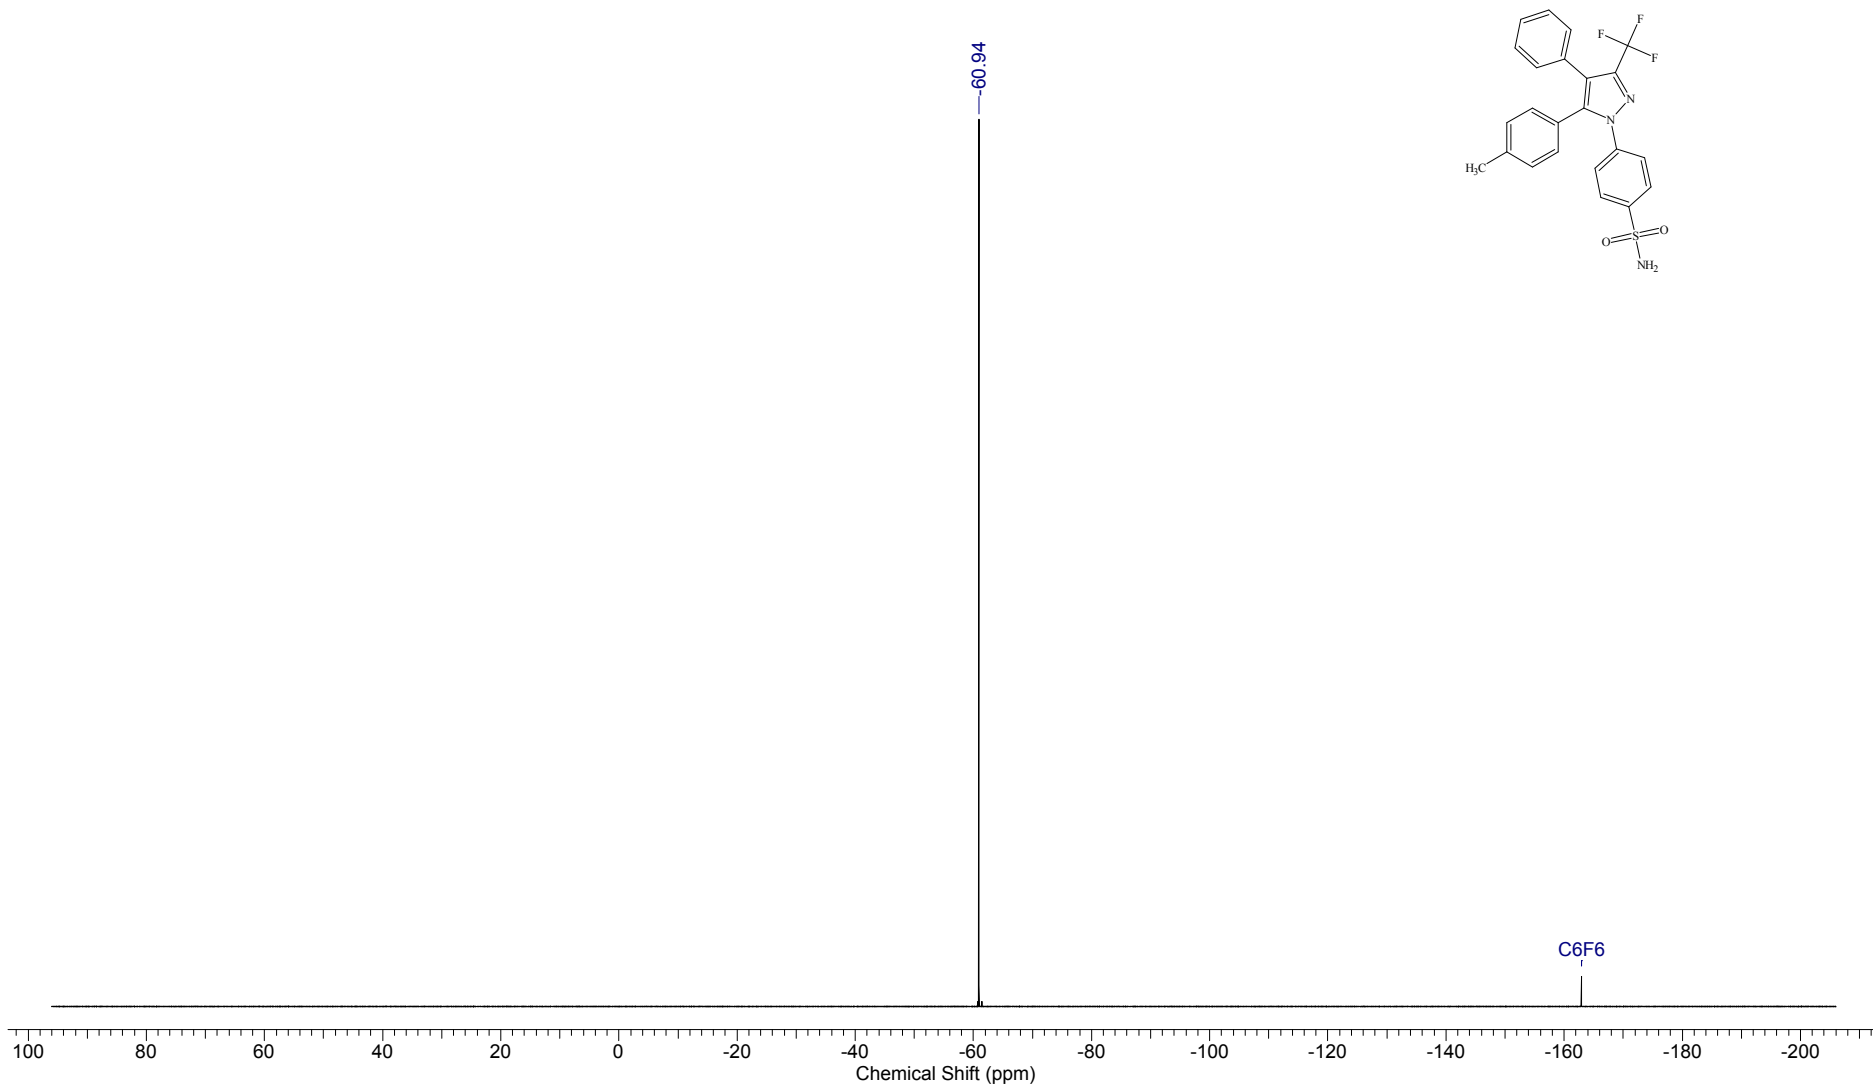

**FW** 481.4906      **Formula** C<sub>25</sub>H<sub>18</sub>F<sub>3</sub>N<sub>3</sub>O<sub>2</sub>S

|                               |                                                                 |                             |                      |                              |          |
|-------------------------------|-----------------------------------------------------------------|-----------------------------|----------------------|------------------------------|----------|
| <b>Acquisition Time (sec)</b> | 3.5479                                                          | <b>Date</b>                 | 10 Aug 2017 19:29:02 | <b>Frequency (MHz)</b>       | 600.13   |
| <b>File Name</b>              | C:\BM_DATA\DOCS\SPEC_BM_H,C_V-VIII.2017\BM-1156\BM-1156_001001r |                             |                      | <b>Points Count</b>          | 131072   |
| <b>Nucleus</b>                | 1H                                                              | <b>Number of Transients</b> | 9                    | <b>Original Points Count</b> | 36056    |
| <b>Pulse Sequence</b>         | zg30                                                            | <b>Solvent</b>              | ACETONITRILE-D3      | <b>Sweep Width (Hz)</b>      | 10162.60 |
| <b>Temperature (degree C)</b> | 30.000                                                          |                             |                      |                              |          |

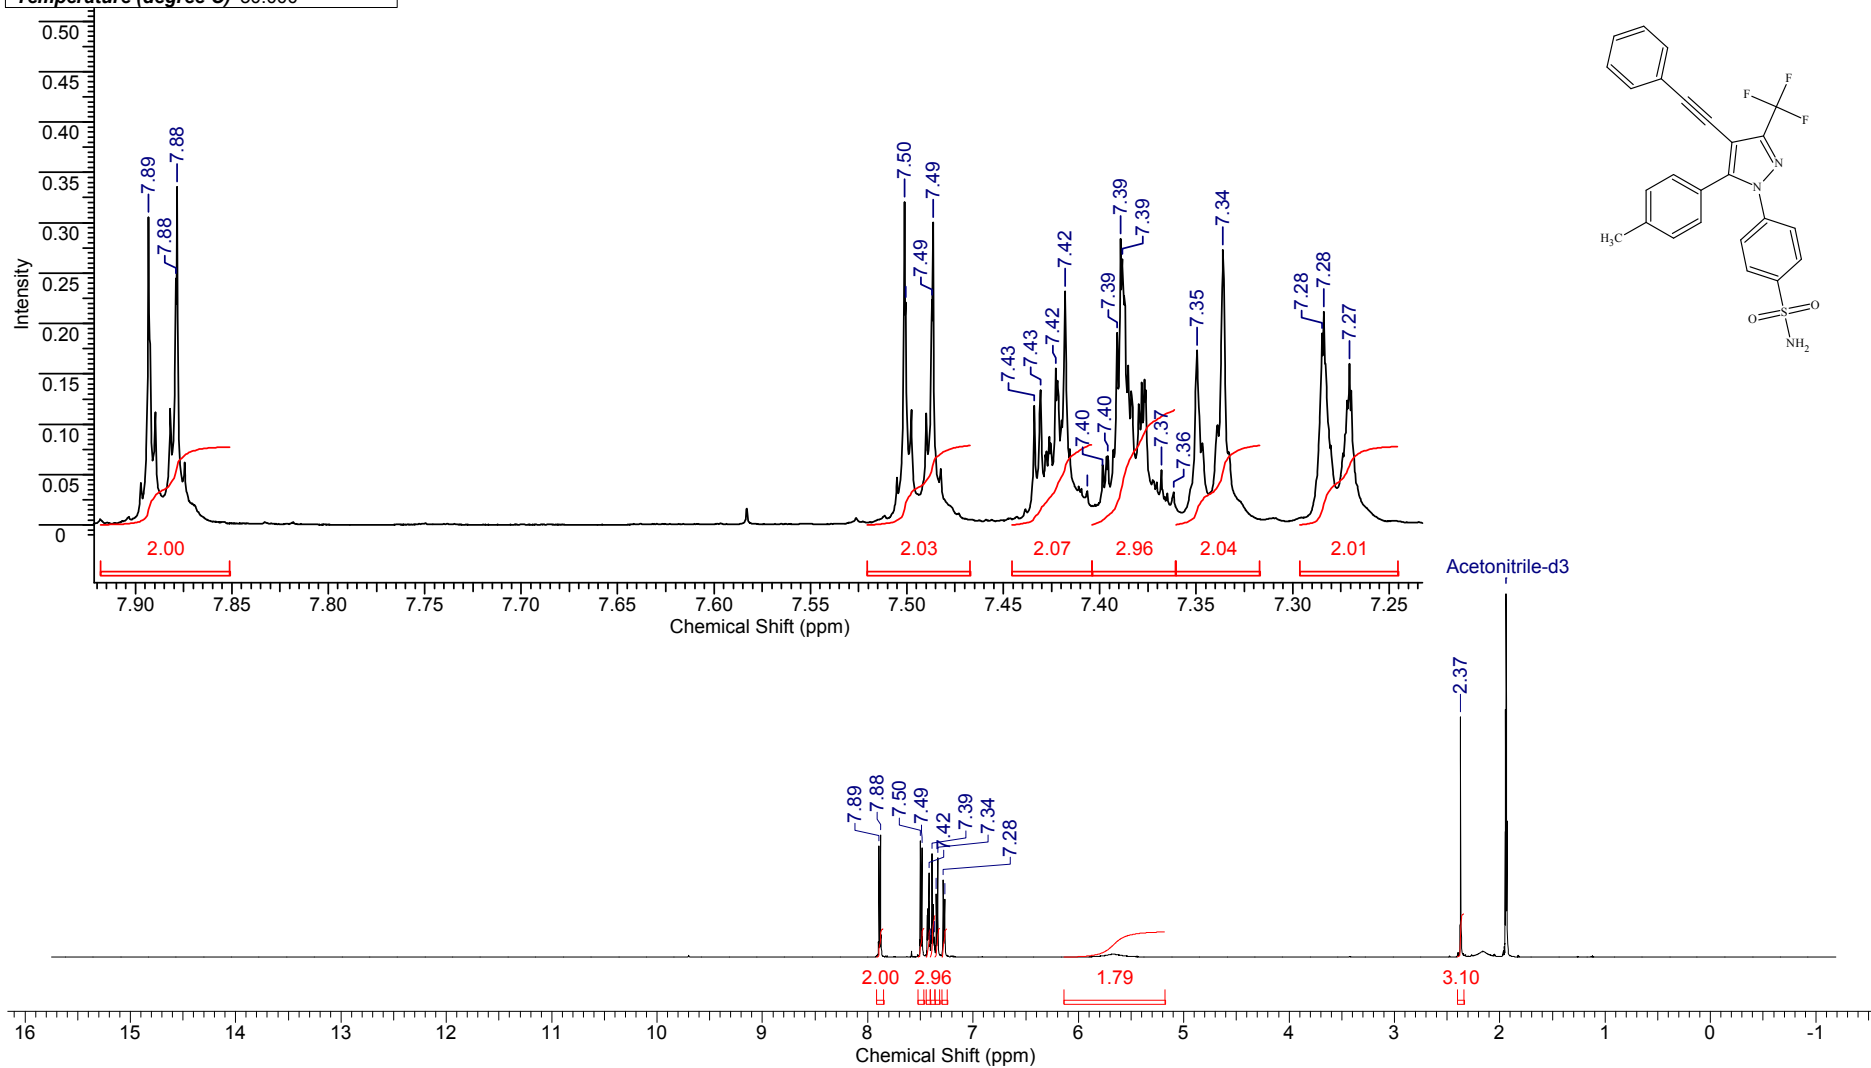

FW 481.4906      Formula C<sub>25</sub>H<sub>18</sub>F<sub>3</sub>N<sub>3</sub>O<sub>2</sub>S

|                        |                                                                 |                      |                      |                       |          |
|------------------------|-----------------------------------------------------------------|----------------------|----------------------|-----------------------|----------|
| Acquisition Time (sec) | 0.4783                                                          | Date                 | 11 Aug 2017 16:37:22 |                       |          |
| File Name              | C:\BM_DATA\DOCS\SPEC_BM_H,C_V-VIII.2017\BM-1156\BM-1156_002001r |                      |                      | Frequency (MHz)       | 150.90   |
| Nucleus                | 13C                                                             | Number of Transients | 30586                | Original Points Count | 17983    |
| Pulse Sequence         | zgpg30                                                          | Solvent              | ACETONITRILE-D3      |                       |          |
| Temperature (degree C) | 30.000                                                          |                      |                      | Sweep Width (Hz)      | 37593.98 |

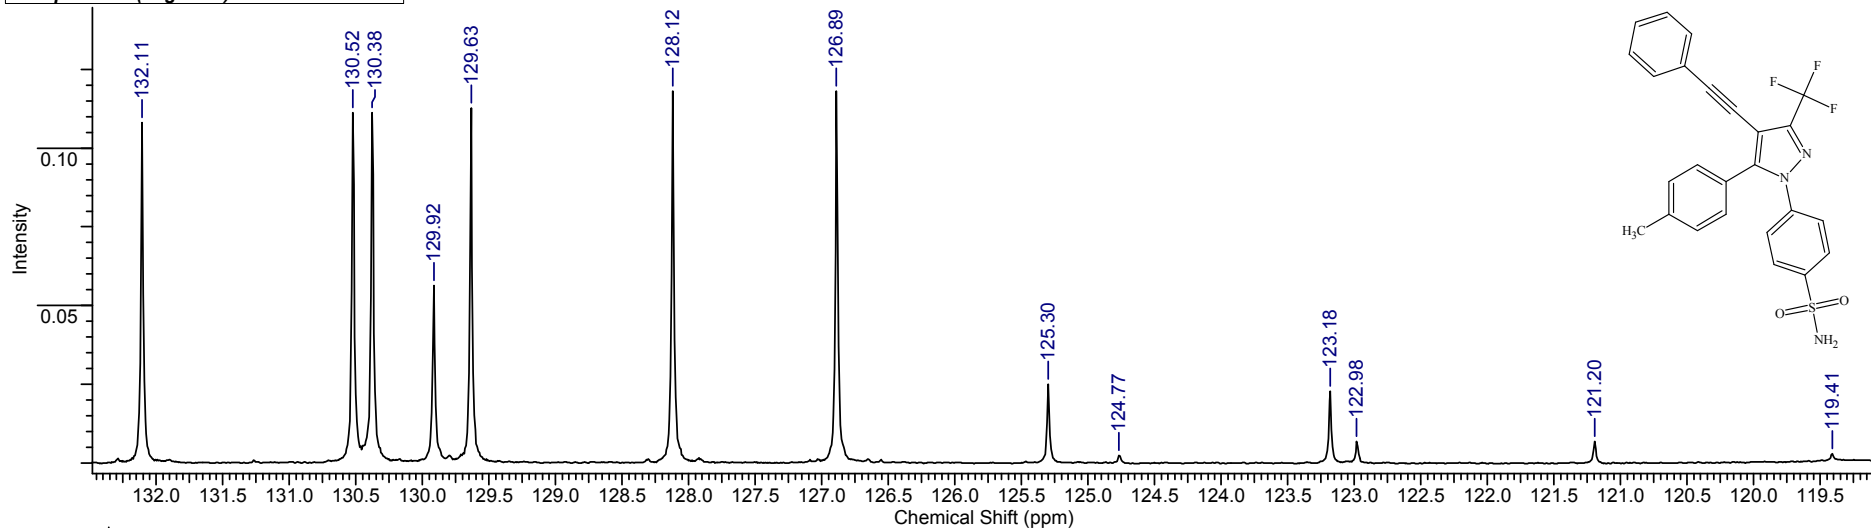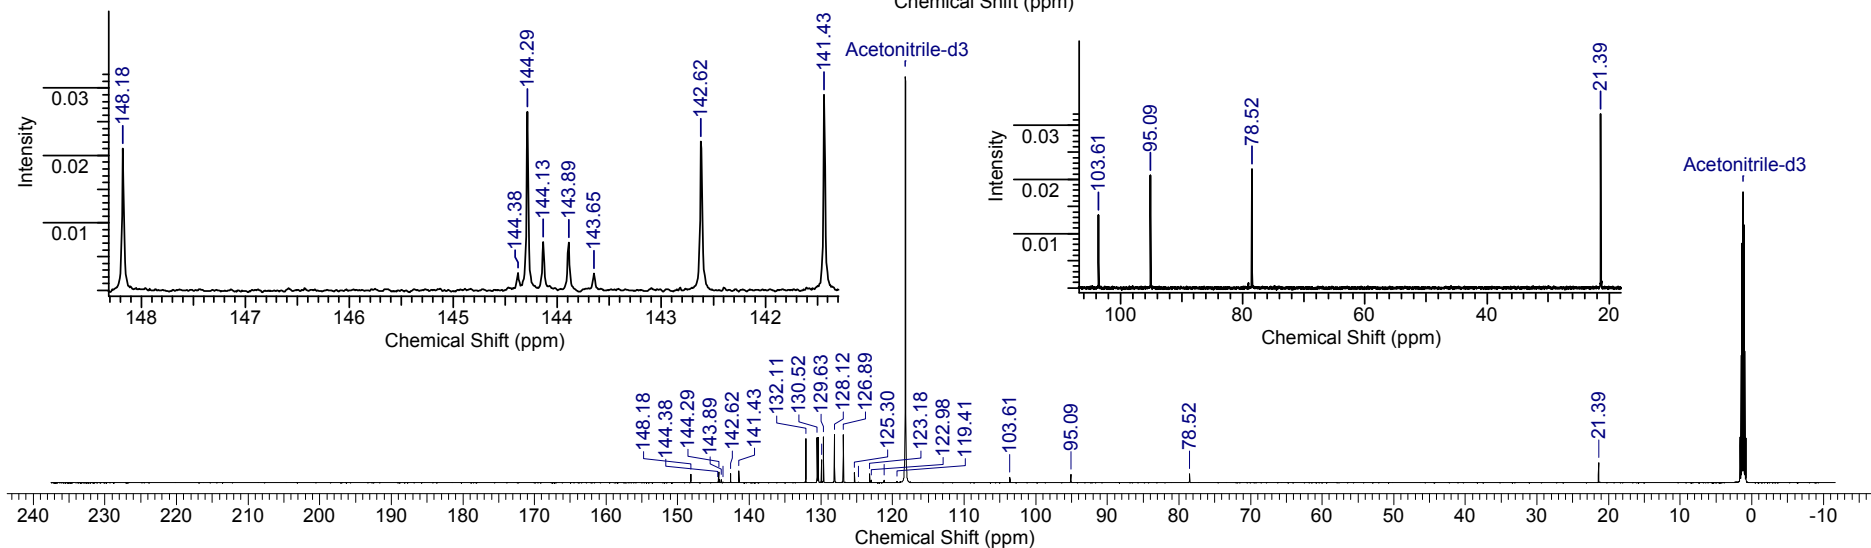

<sup>13</sup>C NMR spectrum of **9** (150.9 MHz, CD<sub>3</sub>CN)



|           |          |                |                                                                                |
|-----------|----------|----------------|--------------------------------------------------------------------------------|
| <b>FW</b> | 481.4906 | <b>Formula</b> | C <sub>25</sub> H <sub>18</sub> F <sub>3</sub> N <sub>3</sub> O <sub>2</sub> S |
|-----------|----------|----------------|--------------------------------------------------------------------------------|

|                               |           |                               |            |                             |                                                                      |                              |        |
|-------------------------------|-----------|-------------------------------|------------|-----------------------------|----------------------------------------------------------------------|------------------------------|--------|
| <b>Acquisition Time (sec)</b> | 1.4680    | <b>Date</b>                   | Sep 4 2017 | <b>File Name</b>            | D:\BN\output\F19\F_2017\2017.09.04\BM-1156-F_20170904_01\FLUORINE_01 |                              |        |
| <b>Frequency (MHz)</b>        | 376.32    | <b>Nucleus</b>                | 19F        | <b>Number of Transients</b> | 8                                                                    | <b>Original Points Count</b> | 166818 |
| <b>Points Count</b>           | 262144    | <b>Pulse Sequence</b>         | s2pul      | <b>Solvent</b>              | ACETONITRILE-D3                                                      |                              |        |
| <b>Sweep Width (Hz)</b>       | 113636.37 | <b>Temperature (degree C)</b> | 22.000     |                             |                                                                      |                              |        |

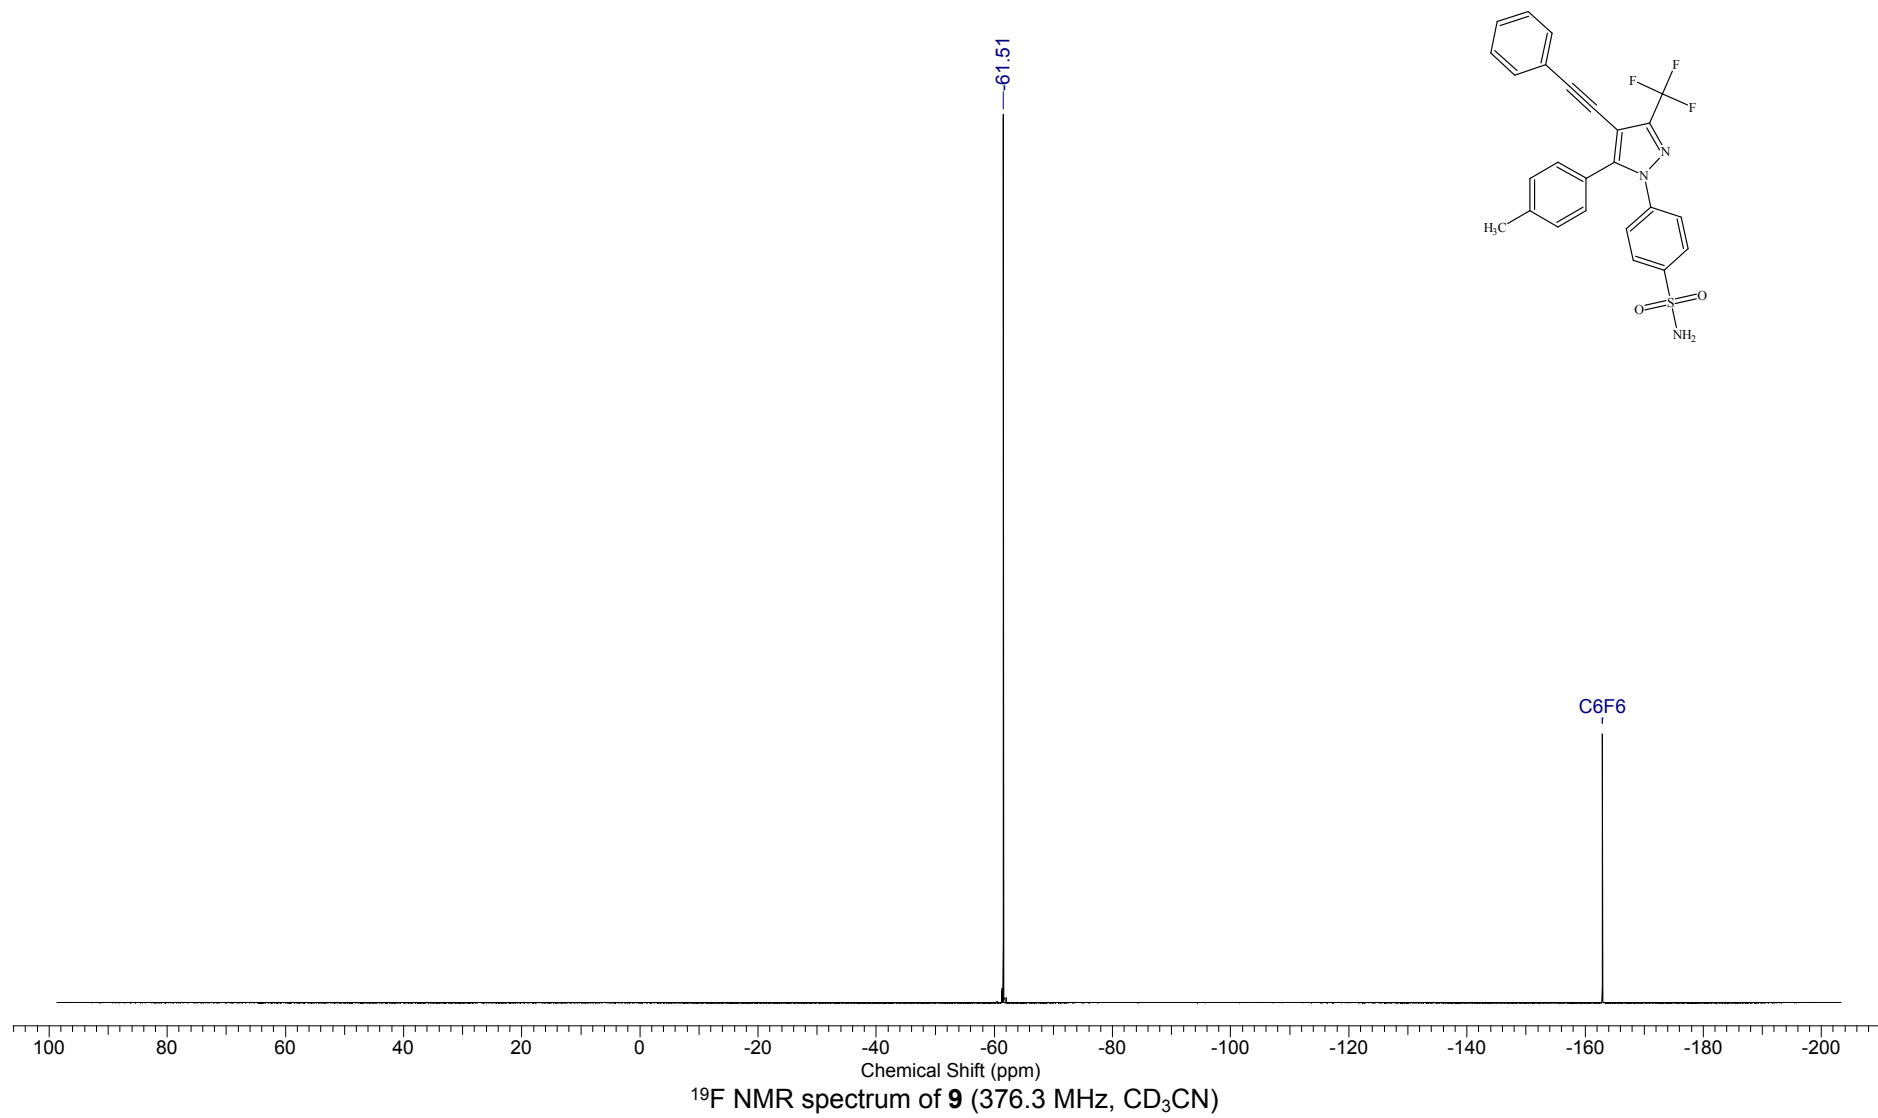

**FW** 519.5612 **Formula** C<sub>24</sub>H<sub>20</sub>F<sub>3</sub>N<sub>3</sub>O<sub>3</sub>S<sub>2</sub>

|                               |                                                               |                             |                      |                              |         |
|-------------------------------|---------------------------------------------------------------|-----------------------------|----------------------|------------------------------|---------|
| <b>Acquisition Time (sec)</b> | 5.9999                                                        | <b>Date</b>                 | 16 Aug 2017 19:47:56 | <b>Frequency (MHz)</b>       | 600.13  |
| <b>File Name</b>              | C:\BM_DATA\DOCS\SPEC_BM_H,C_V-VIII.2017\BM-1157_cdcl3_001001r |                             |                      | <b>Points Count</b>          | 524288  |
| <b>Nucleus</b>                | 1H                                                            | <b>Number of Transients</b> | 16                   | <b>Original Points Count</b> | 57691   |
| <b>Pulse Sequence</b>         | zg                                                            | <b>Solvent</b>              | CHLOROFORM-D         | <b>Sweep Width (Hz)</b>      | 9615.38 |
| <b>Temperature (degree C)</b> | 30.000                                                        |                             |                      |                              |         |

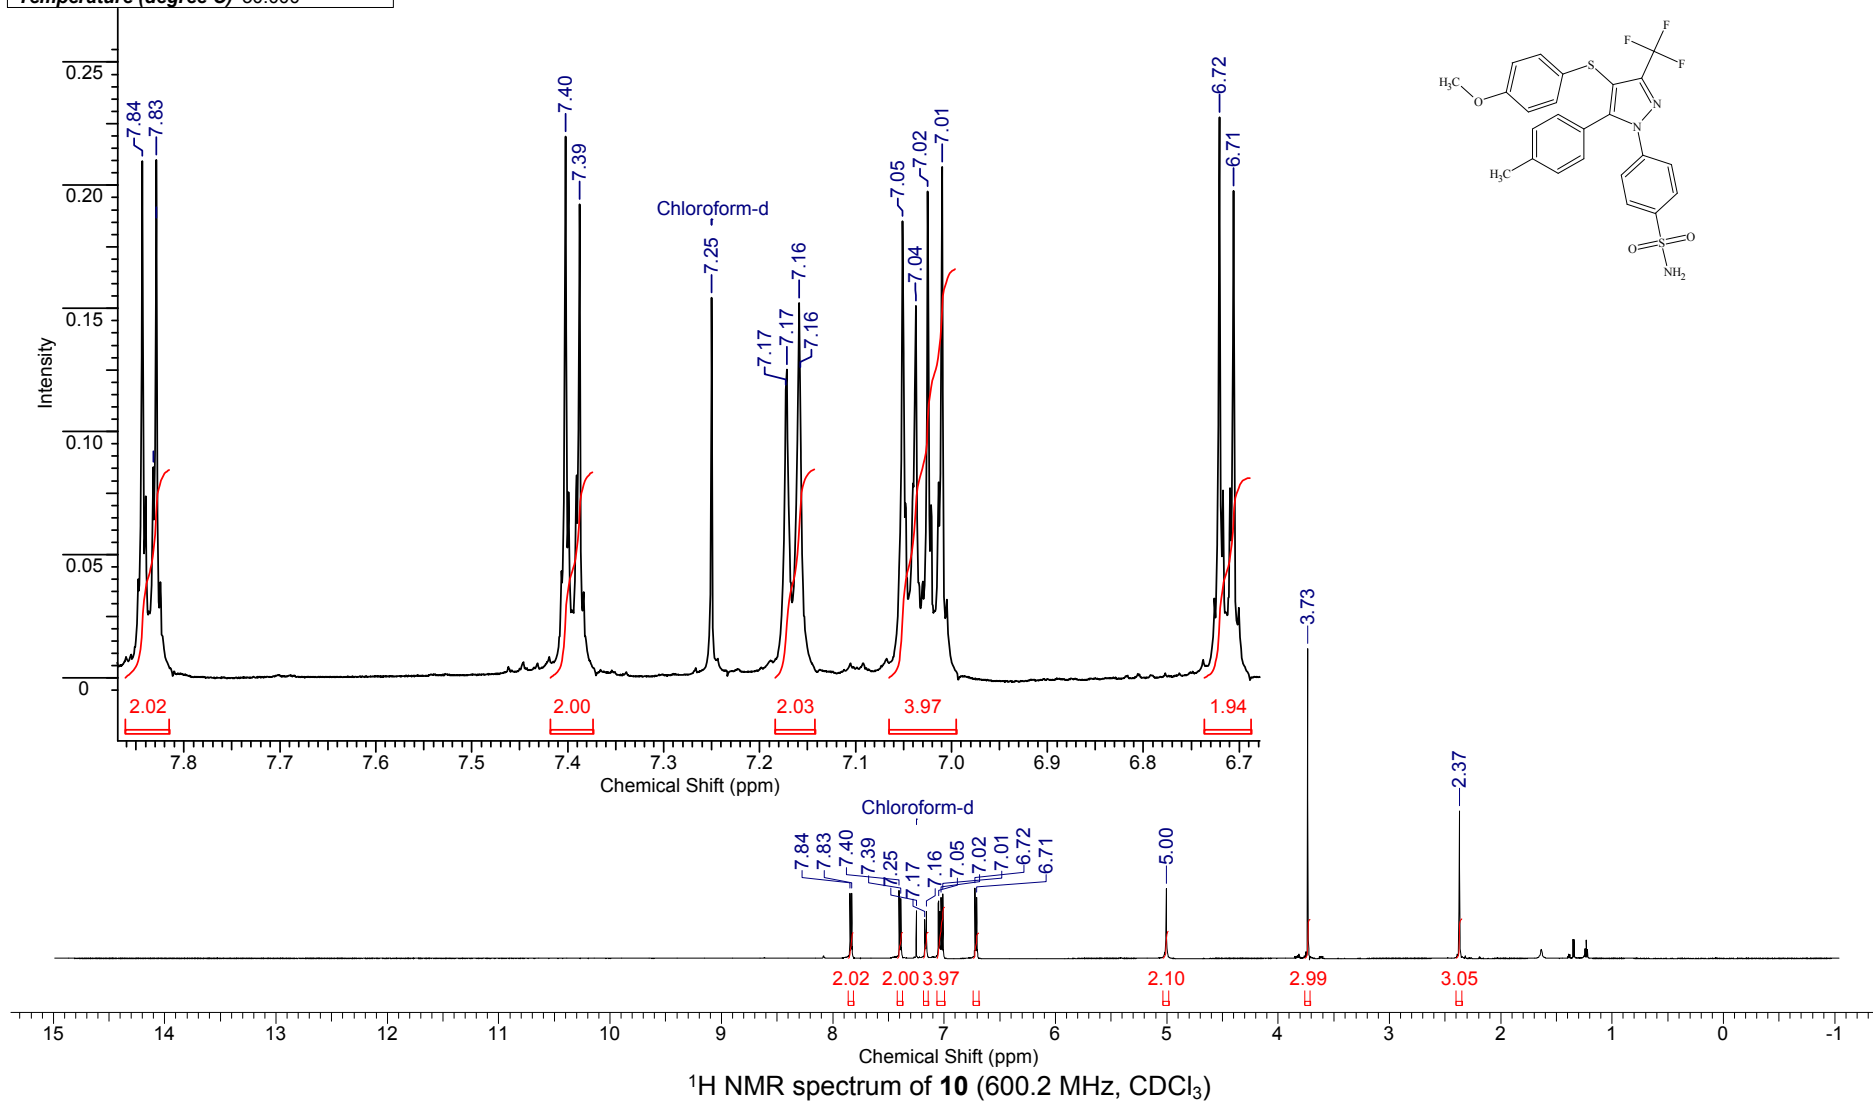

|           |          |                |                                                                                             |
|-----------|----------|----------------|---------------------------------------------------------------------------------------------|
| <b>FW</b> | 519.5612 | <b>Formula</b> | C <sub>24</sub> H <sub>20</sub> F <sub>3</sub> N <sub>3</sub> O <sub>3</sub> S <sub>2</sub> |
|-----------|----------|----------------|---------------------------------------------------------------------------------------------|

|                               |                                                               |                             |                      |                              |                     |        |
|-------------------------------|---------------------------------------------------------------|-----------------------------|----------------------|------------------------------|---------------------|--------|
| <b>Acquisition Time (sec)</b> | 2.9999                                                        | <b>Date</b>                 | 16 Aug 2017 20:16:08 |                              |                     |        |
| <b>File Name</b>              | C:\BM_DATA\DOCS\SPEC_BM_H,C_V-VIII.2017\BM-1157_cdcl3_013001r |                             |                      | <b>Frequency (MHz)</b>       | 150.90              |        |
| <b>Nucleus</b>                | 13C                                                           | <b>Number of Transients</b> | 256                  | <b>Original Points Count</b> | 95236               |        |
| <b>Pulse Sequence</b>         | zgpg                                                          | <b>Solvent</b>              | CHLOROFORM-D         |                              | <b>Points Count</b> | 262144 |
| <b>Temperature (degree C)</b> | 30.000                                                        |                             |                      | <b>Sweep Width (Hz)</b>      | 31746.03            |        |

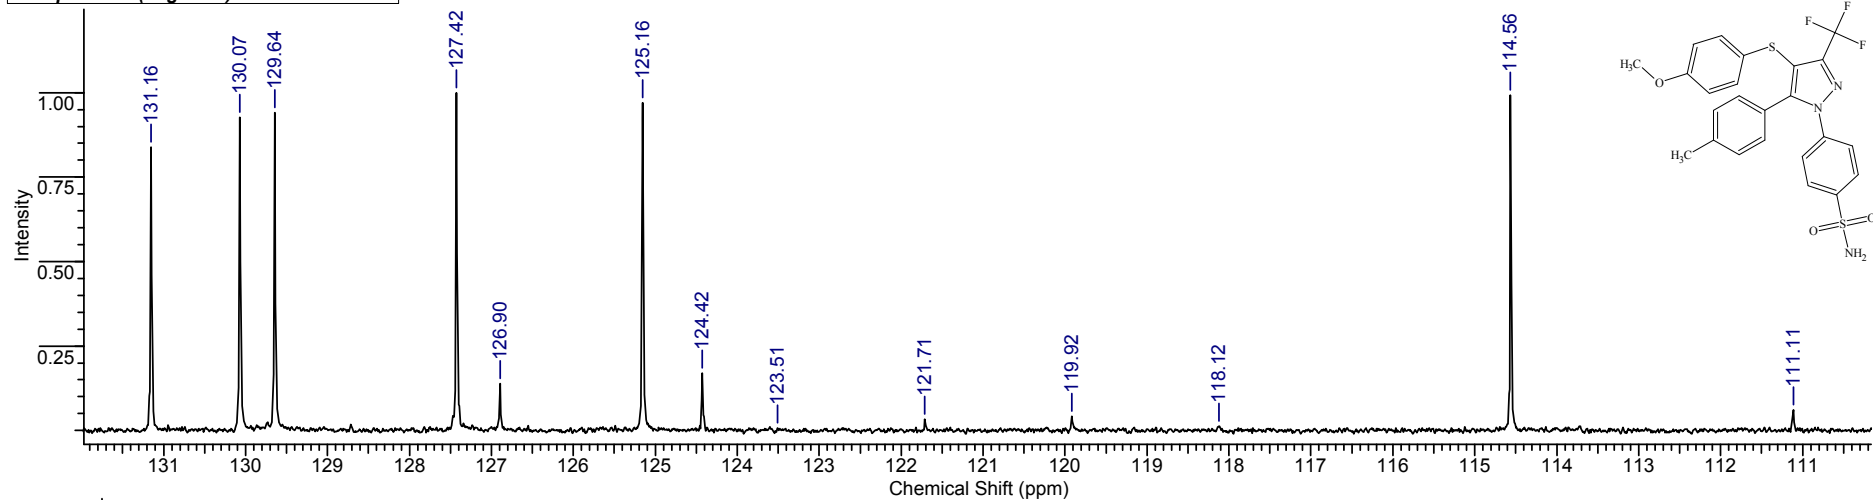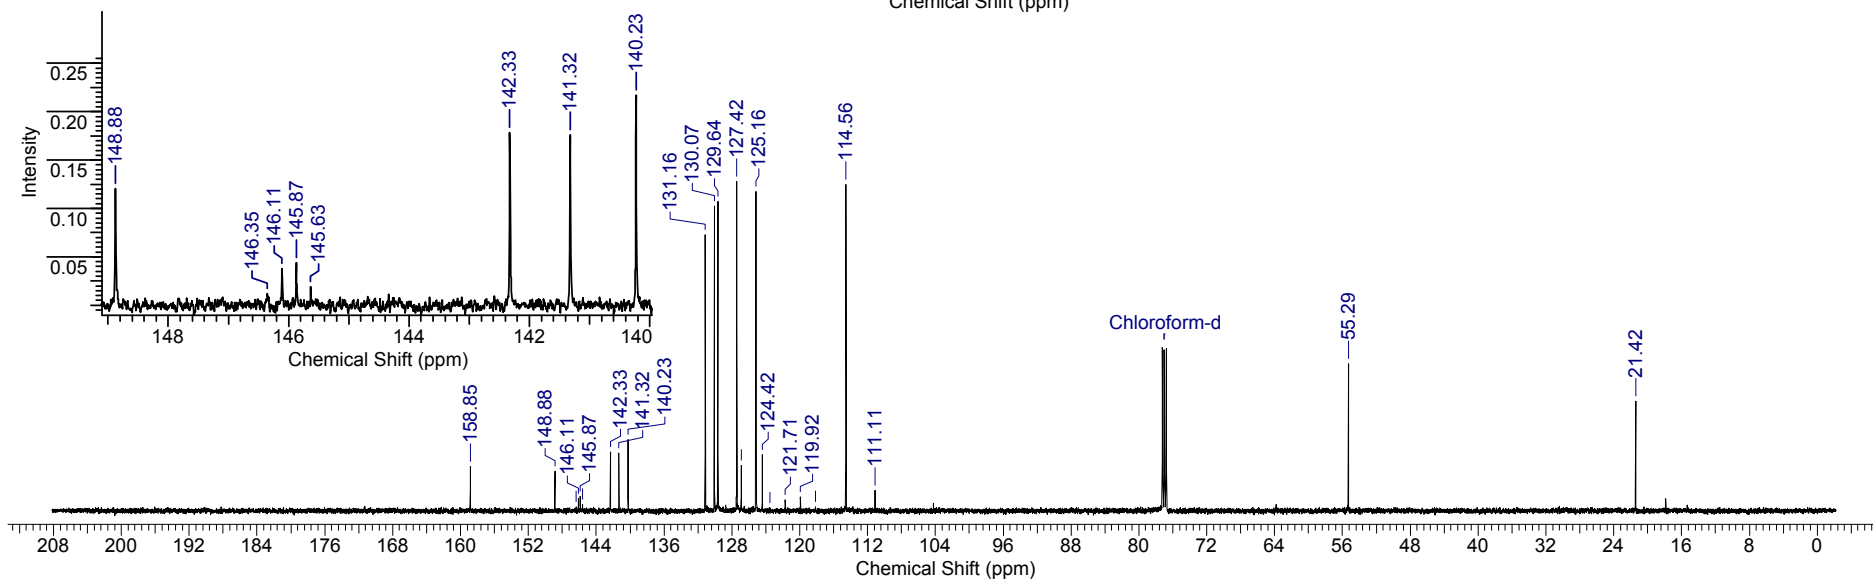

<sup>13</sup>C NMR spectrum of **10** (150.9 MHz, CDCl<sub>3</sub>)

|           |          |                |                                                                                             |
|-----------|----------|----------------|---------------------------------------------------------------------------------------------|
| <b>FW</b> | 519.5612 | <b>Formula</b> | C <sub>24</sub> H <sub>20</sub> F <sub>3</sub> N <sub>3</sub> O <sub>3</sub> S <sub>2</sub> |
|-----------|----------|----------------|---------------------------------------------------------------------------------------------|

|                               |           |                               |            |                             |                                                                      |                              |        |
|-------------------------------|-----------|-------------------------------|------------|-----------------------------|----------------------------------------------------------------------|------------------------------|--------|
| <b>Acquisition Time (sec)</b> | 2.0000    | <b>Date</b>                   | Sep 4 2017 | <b>File Name</b>            | D:\BN\output\F19\F_2017\2017.09.04\BM-1157-F_20170904_01\FLUORINE_01 |                              |        |
| <b>Frequency (MHz)</b>        | 376.32    | <b>Nucleus</b>                | 19F        | <b>Number of Transients</b> | 8                                                                    | <b>Original Points Count</b> | 227273 |
| <b>Points Count</b>           | 262144    | <b>Pulse Sequence</b>         | s2pul      | <b>Solvent</b>              | CHLOROFORM-D                                                         |                              |        |
| <b>Sweep Width (Hz)</b>       | 113636.37 | <b>Temperature (degree C)</b> | 22.000     |                             |                                                                      |                              |        |

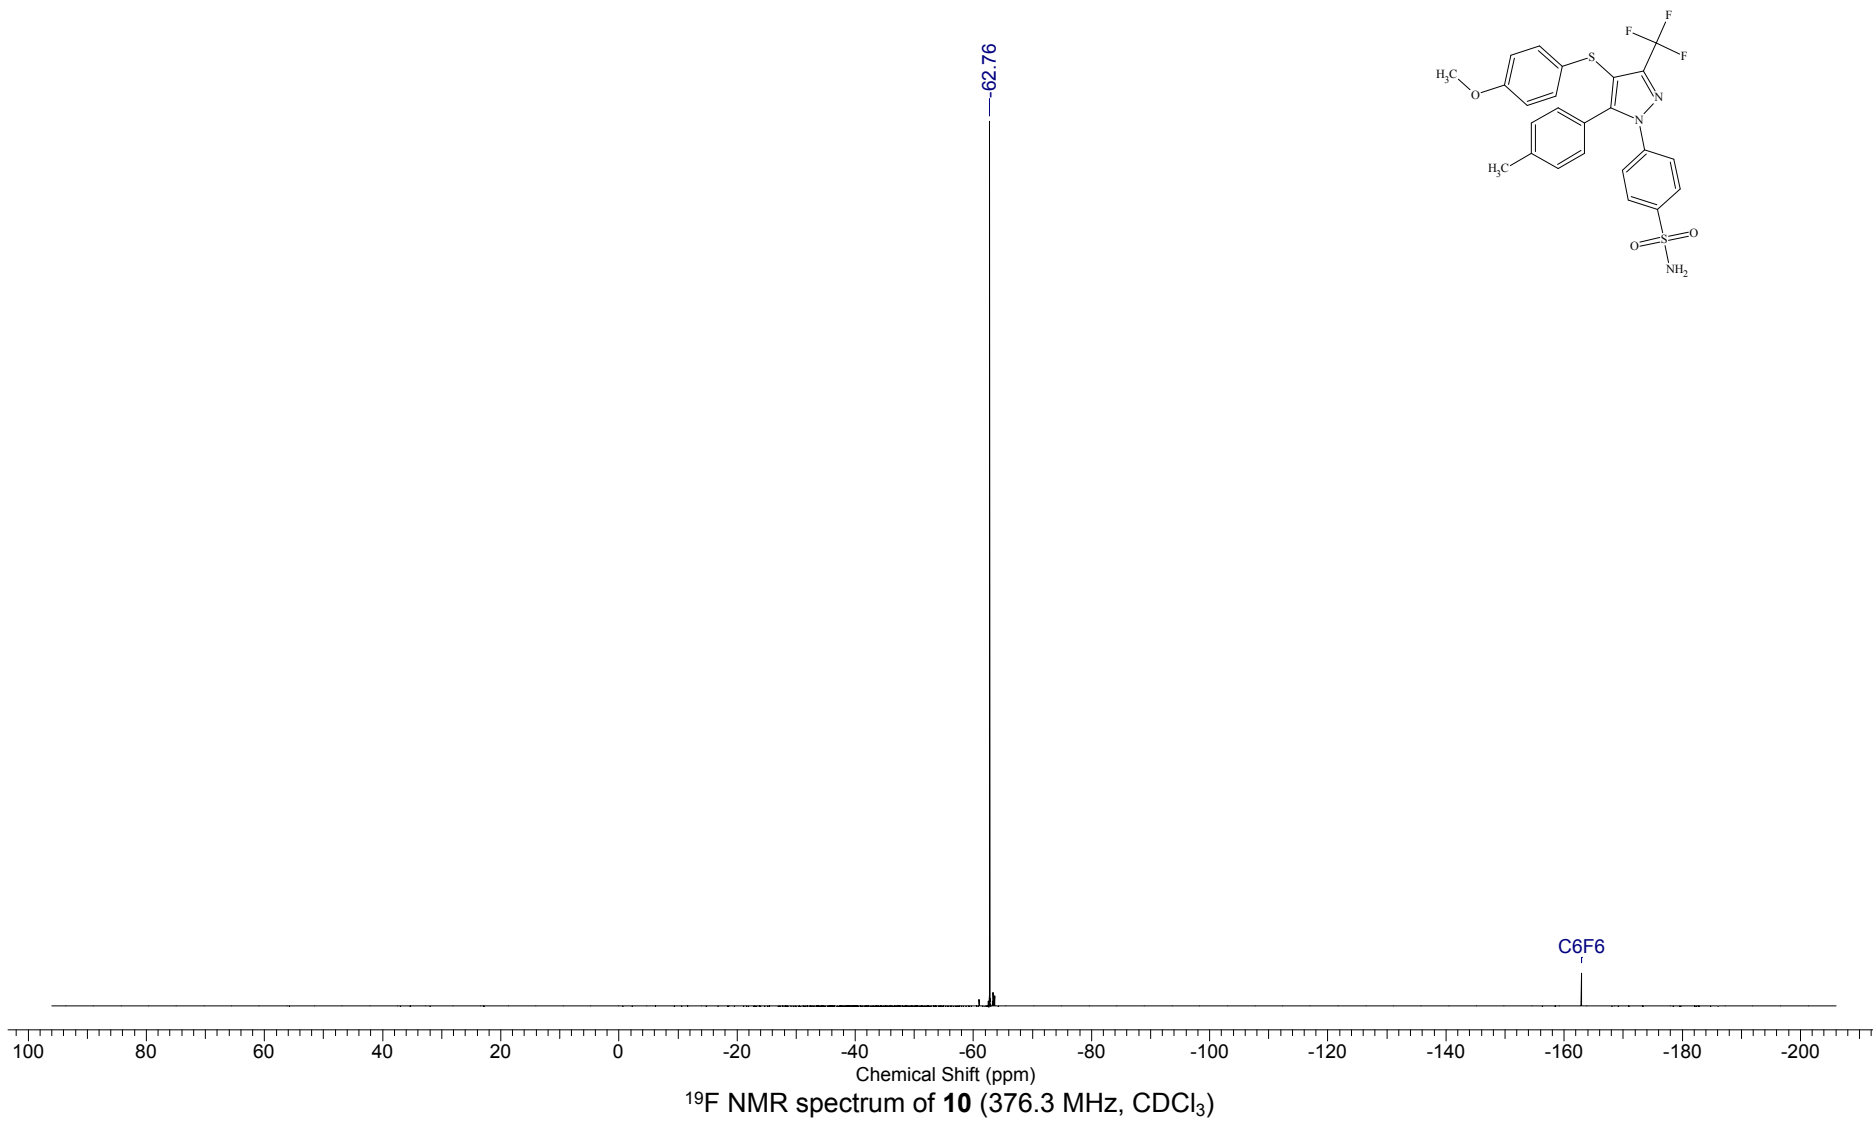

Supplement: c8ob02247j1.pdf [file c8ob02247j1.pdf]
